# Supplementary material for: Differential interferon-α subtype induced immune signatures are associated with suppression of SARS-CoV-2 infection
Source: PubMed Central journal article supplement (PMC8872780; doi:10.1073/pnas.2111600119), 2022-02-07
Supplement: pnas.2111600119.sapp.pdf [file pnas.2111600119.sapp.pdf]

## **Supplementary Information for**

Differential interferon- $\alpha$  subtype induced immune signatures are associated with suppression of SARS-CoV-2 infection

Jonas Schuhenn, Toni Luise Meister, Daniel Todt, Thilo Bracht, Karin Schork, Jean-Noel Billaud, Carina Elsner, Natalie Heinen, Zehra Karakoese, Sibylle Haid Sriram Kumar, Linda Brunotte, Martin Eisenacher, Yunyun Di, Jocelyne Lew, Darryl Falzarano, Jieliang Chen, Zhenghong Yuan, Thomas Pietschmann, Bettina Wiegmann, Hendrik Beckert, Christian Taube, Vu Thuy Khanh Le-Trilling, Mirko Trilling, Adalbert Krawczyk, Stephan Ludwig, Barbara Sitek, Eike Steinmann, Ulf Dittmer, Kerry J. Lavender, Kathrin Sutter and Stephanie Pfaender

Corresponding authors:

Kerry J. Lavender

Email: [kerry.lavender@usask.ca](mailto:kerry.lavender@usask.ca)

Kathrin Sutter

Email: [Kathrin.sutter@uni-due.de](mailto:Kathrin.sutter@uni-due.de)

Stephanie Pfaender

Email: [Stephanie.pfaender@rub.de](mailto:Stephanie.pfaender@rub.de)

### **This PDF file includes:**

Figures S1 to S8

Legends for Figures S1 to S8

Tables S1 to S5

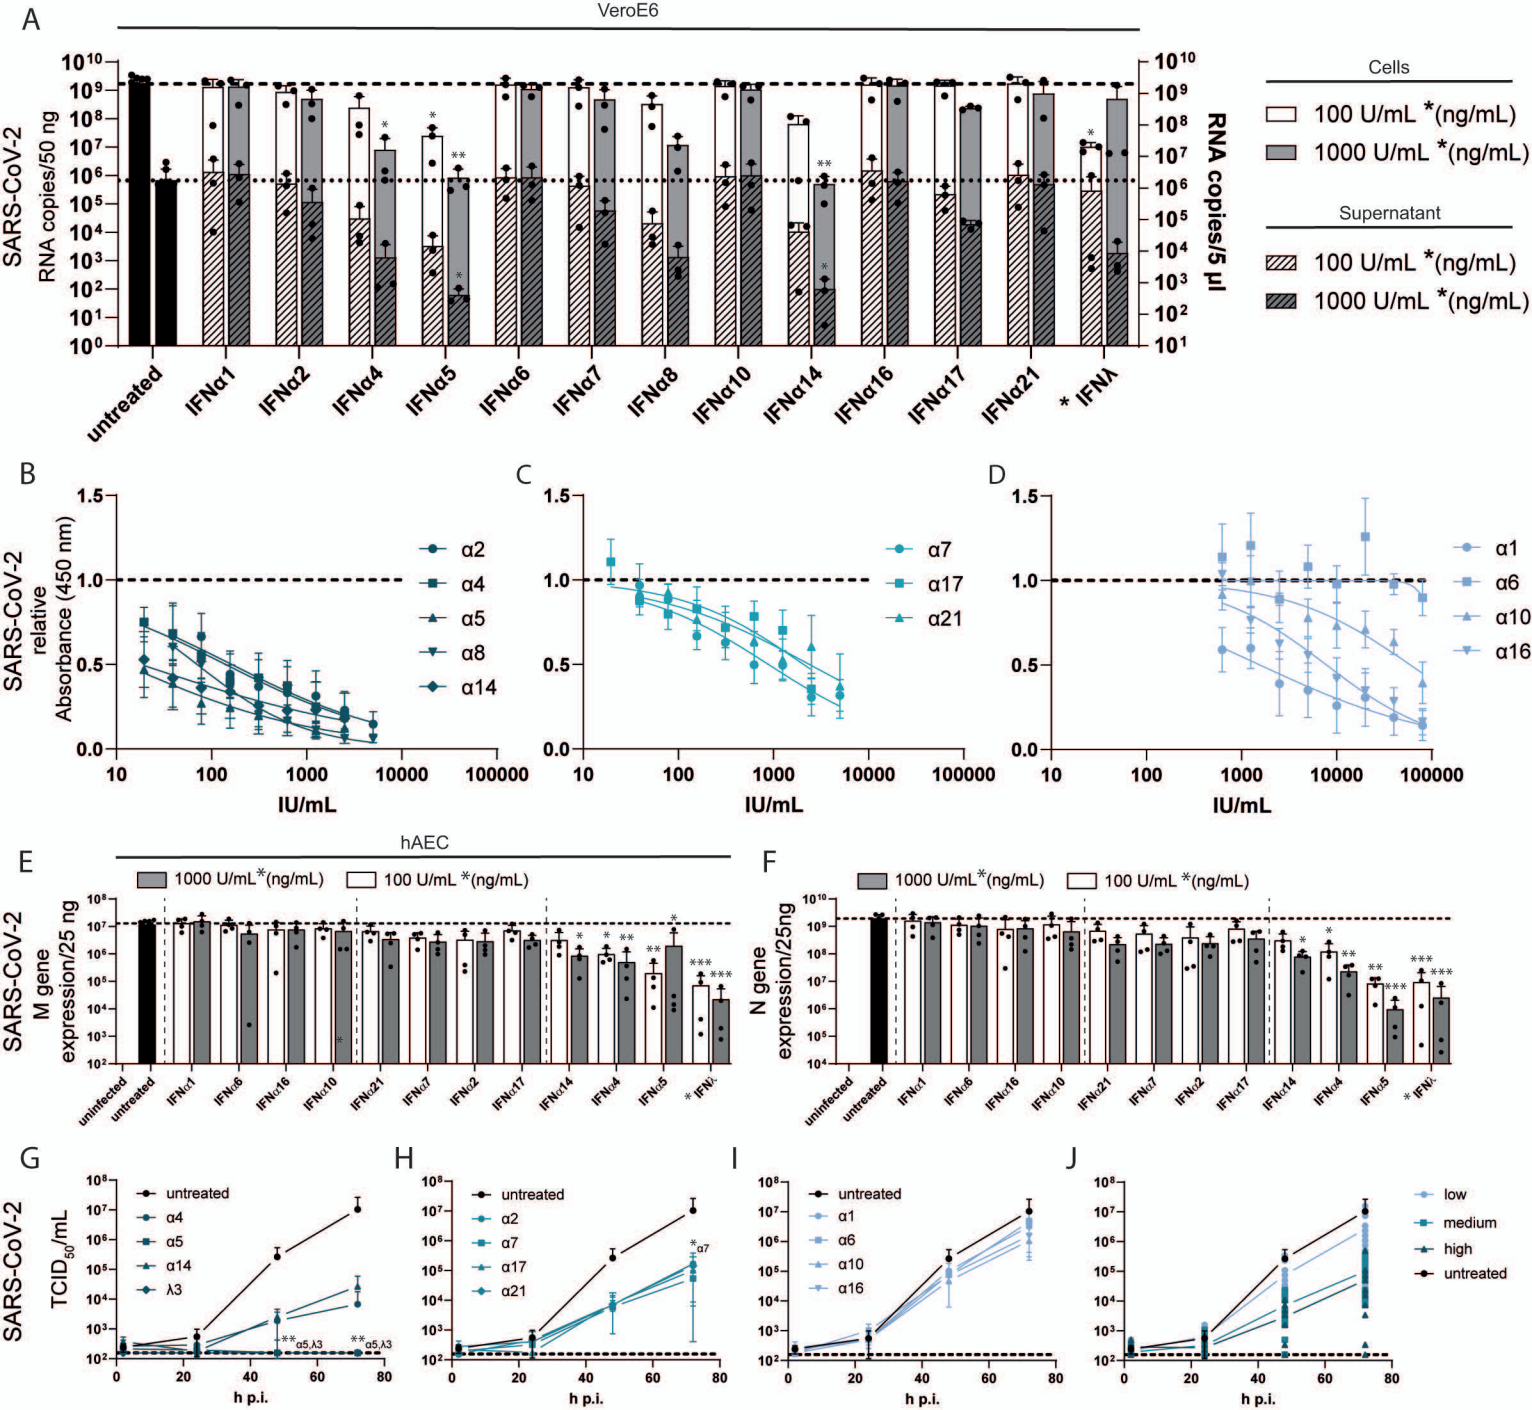

**Supplementary Fig. 1: Treatment with IFN $\alpha$  subtypes reveals distinct antiviral effects against SARS-CoV-2**

(A) Antiviral activity of IFN $\alpha$  subtypes and IFN $\lambda$ 3 against SARS-CoV-2 were analysed in VeroE6 cells and cell supernatant by qRT-PCR. IFN $\alpha$  subtypes were titrated against SARS-CoV-2 on VeroE6 cells by ic-ELISA assay and the IFNs were grouped as mean values in high (B), medium (C) and low (D) antiviral pattern.

Antiviral activity of IFN $\alpha$  subtypes and IFN $\lambda$ 3 in SARS-CoV-2-infected primary hAECs at 72 h p.i. determined by qRT-PCR analysis of *M gene* (E) and *N gene* (F). Kinetics of the antiviral activity of IFNs by TCID<sub>50</sub> assay grouped into high (G), medium (H) and low (I) antiviral pattern and the mean values of each group are plotted in (J). Mean values of high (I) and low/not (J) antiviral IFNs are shown. Mean values  $\pm$  SEM are shown. (A-D) n=3 (E-J) n=4.

\* p<0.05; \*\* p<0.01; \*\*\* p<0.001.

A

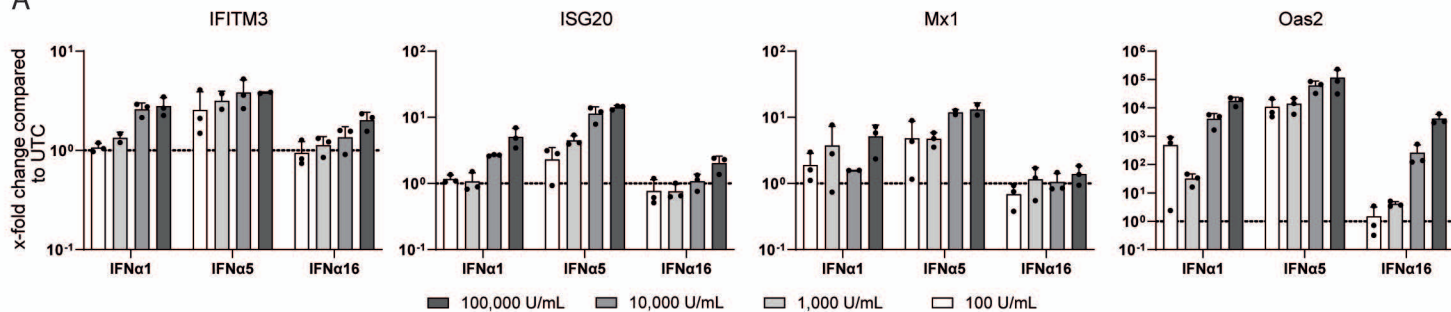

B

hAEC (SARS-CoV-2)

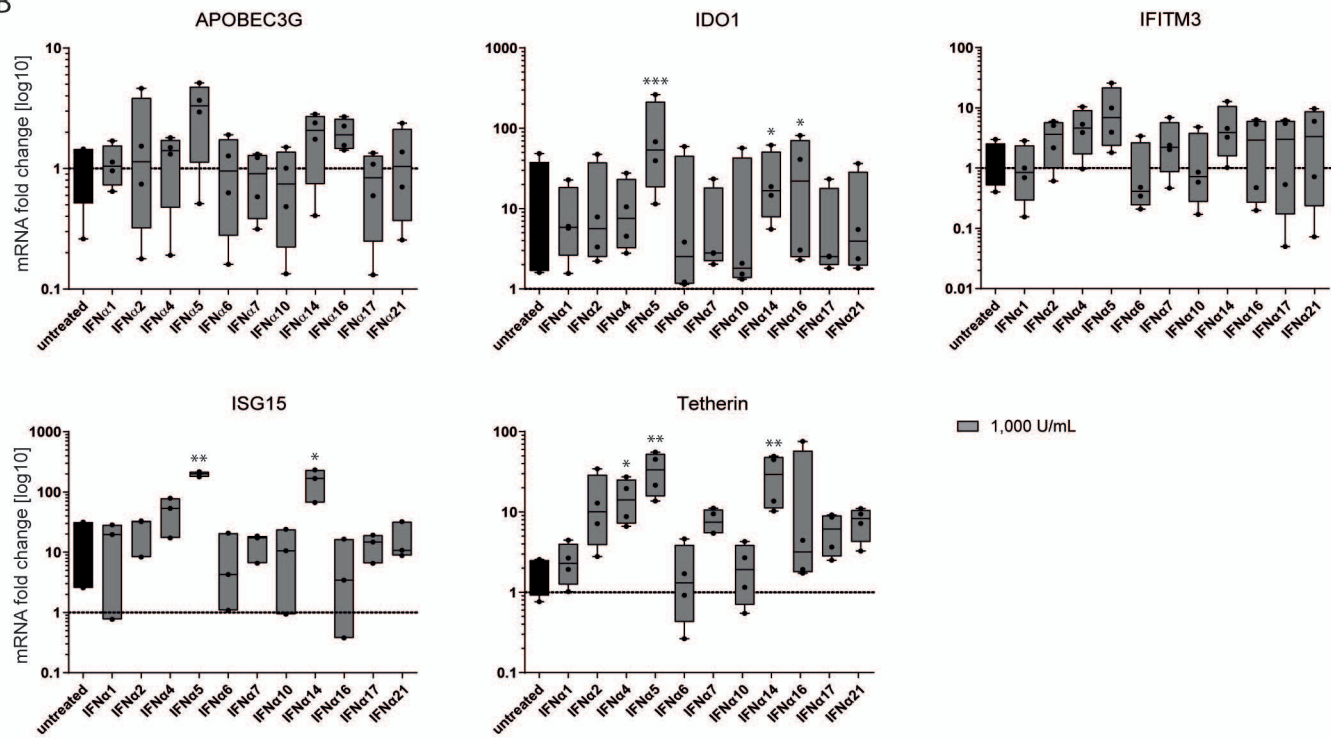

**Supplementary. Fig. 2: ISG induction upon IFN $\alpha$  subtype stimulation**

(A) mRNA expression of different ISGs in IFN-treated VeroE6 cells at 16 h p. stimulation determined by qRT-PCR analysis. (B) mRNA expression of different ISGs in IFN-treated SARS-CoV-2-infected primary hAECs at 72 h p.i. determined by qRT-PCR analysis. Mean values of mRNA expression is shown as fold change compared to untreated control. (A) n=3, (B) n=4. B: \* p<0.05; \*\* p<0.01; \*\*\* p<0.001

A

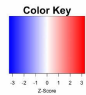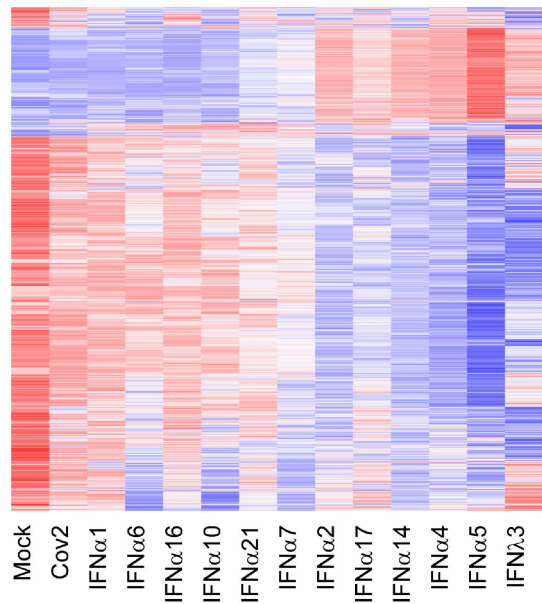

B

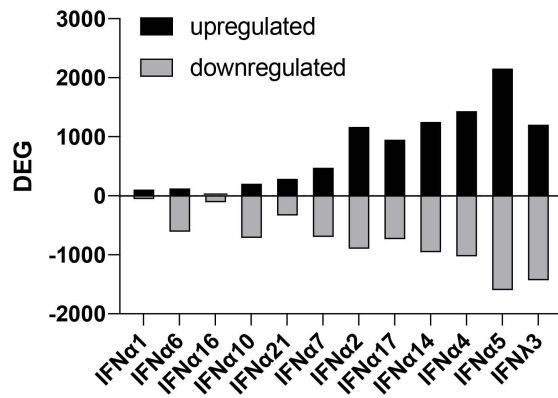

**Supplementary Fig. 3: Transcriptomic analysis display IFN $\alpha$  subtype specific gene signatures**

(A) Transcriptomic analyses of IFN-treated (16 hours post-treatment) or SARS-CoV-2-infected (18 hours post infection) hAECs. Heat maps displaying differentially expressed genes (DEG) from at least one comparison of an IFN vs. Mock. (B) Numbers of up- and downregulated DEGs of IFN-treated compared to untreated hAECs (4 donors) shown as bars.

A

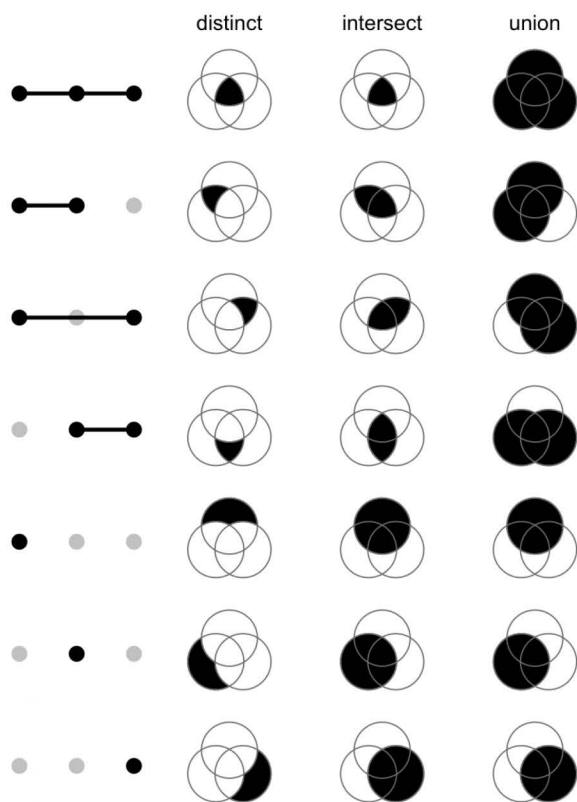

B

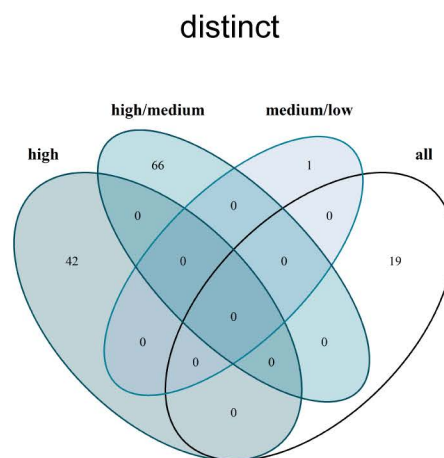

C

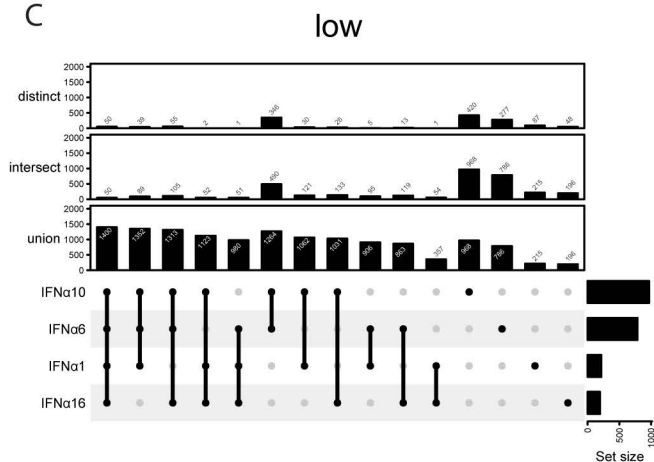

D

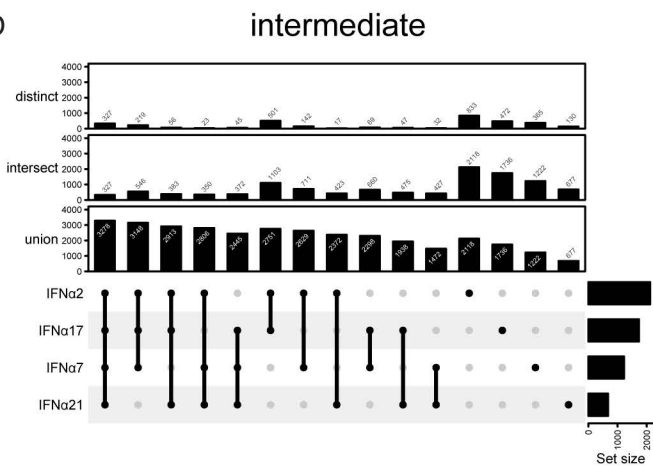

E

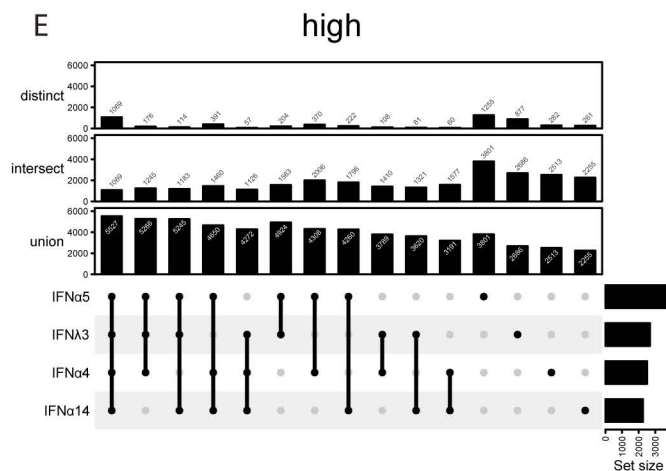



**Supplementary Fig. 4: Transcriptomic analysis reveal different patterns of distinct, intersect and union genes**

(A-E) UpSet plots to summarize distinct, intersect and union differentially expressed genes (DEG) of IFN-treated (16 hours post-treatment) hAECs (4 donors). (A) Schematic depiction of distinct, intersect and union DEGs. (B) Venn diagram of distinct DEGs expressed by all high, medium and low antiviral IFNs. (C) UpSet plots showing distinct, intersect and union DEGs of low (C), medium (D) and high (E) antiviral IFNs. Numbers of individually or group-specific DEGs are shown as bars and numbers. The bottom right horizontal bar graph labelled Set Size shows the total number of DEGs per treatment.

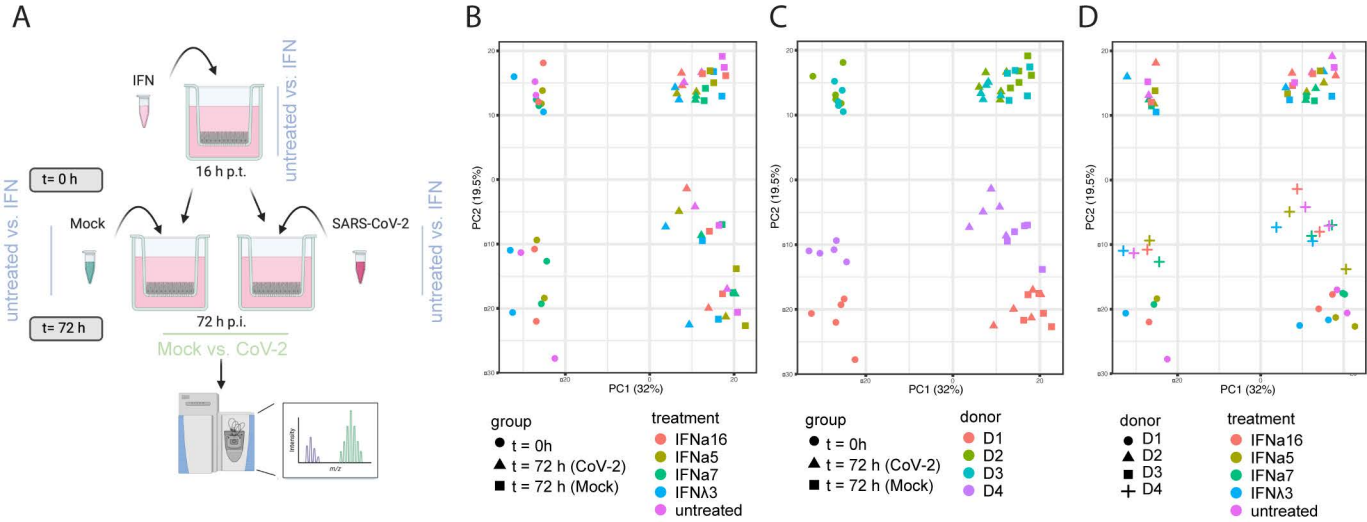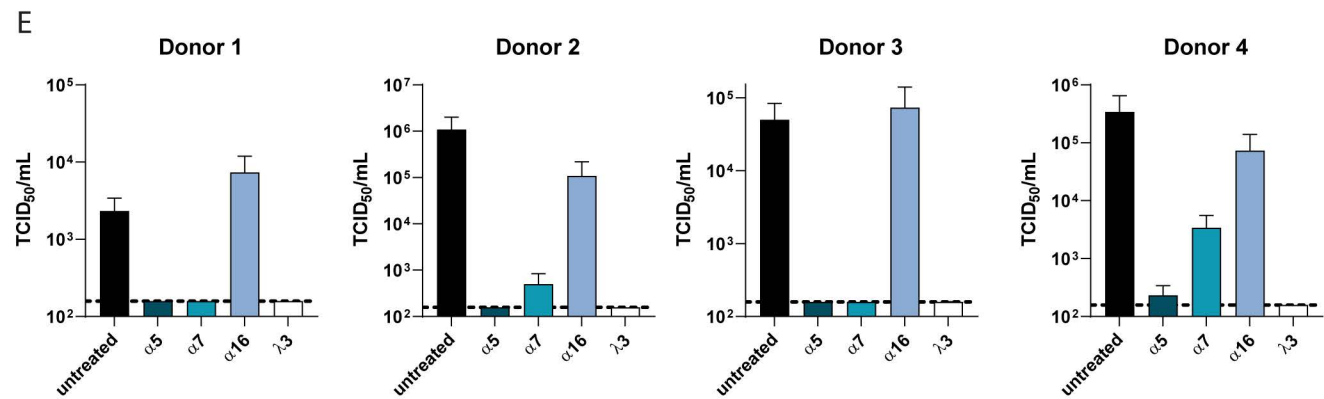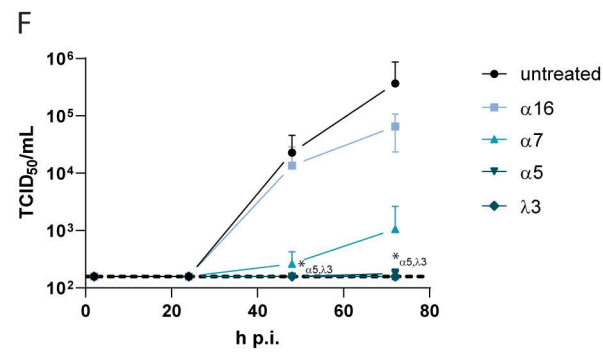

### **Supplementary Fig. 5: Proteomic analysis highlights key cellular mediators**

(A-D) Proteomic analysis of IFN-treated and/or SARS-CoV-2-infected hAECs. (A) Schematic depiction (B-D) Principal component analysis (PCA) of hAEC proteomics. (B) The first two principal components (PCs) are plotted and shaped/coloured according to group and IFN-treatment (B); to group and individual donors (C) or to individual donors and IFN-treatment (D). PCA was performed using all proteins without missing values. Percentage of variation accounted for by each principal component is shown in brackets with the axis label. (E) Antiviral activity of IFN $\alpha$  subtypes and IFN $\lambda$ 3 in SARS-CoV-2-infected primary hAECs of 4 individual donors used for proteomic analysis at 72 h p.i. determined by TCID<sub>50</sub> assay. (F) Kinetics of the antiviral activity of selected IFNs by TCID<sub>50</sub> assay in SARS-CoV-2-infected primary hAECs of 4 individual donors used for proteomic analysis shown as mean values + SEM. D: 48h: \*\*\* p<0.001; \*\*\*\*\* p<0.0001

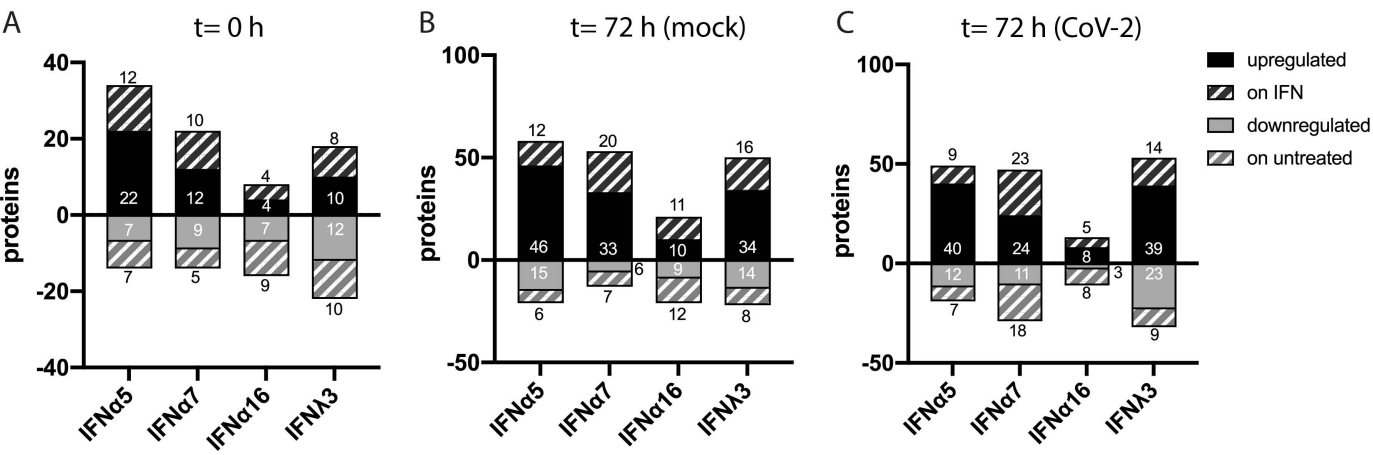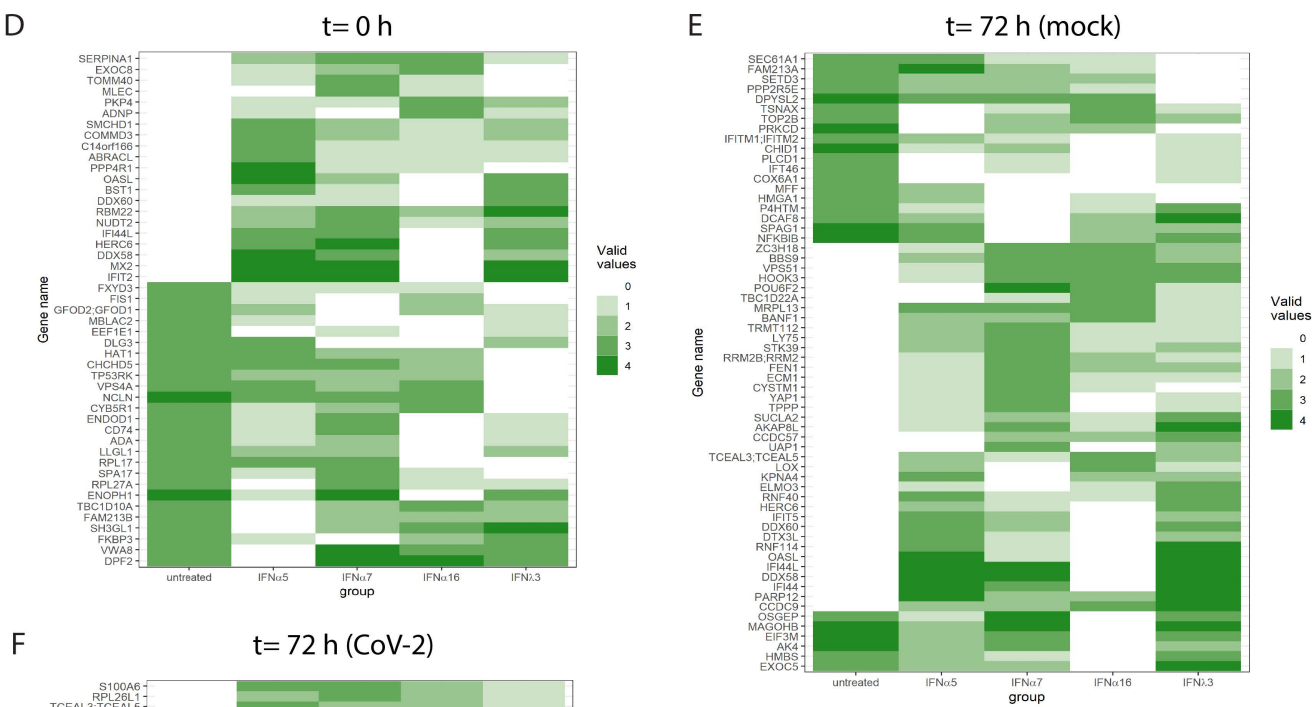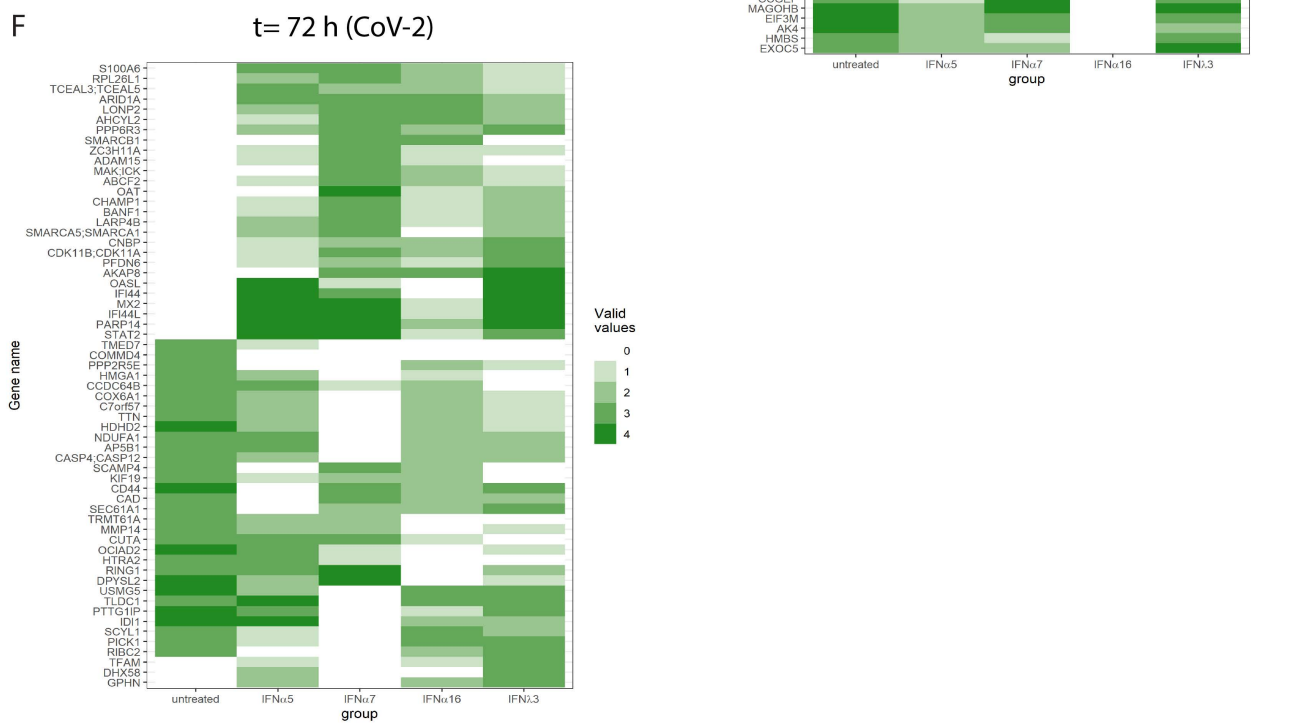

**Supplementary Fig. 6: Proteomic analysis results in differential switched on/off proteins**

Proteomic analysis of IFN-treated and/or SARS-CoV-2-infected hAECs. (A) Differentially regulated or induced (on IFN compared to untreated) proteins in IFN-stimulated hAECs at t=0h (A), at t=72h (mock) (B) or at t=72h (CoV-2) (C). Heatmaps of on-off regulated proteins in IFN-stimulated hAECs at t=0 h (D), at t=72 h (mock) (E) or at t=72 h (CoV-2) (F).

A

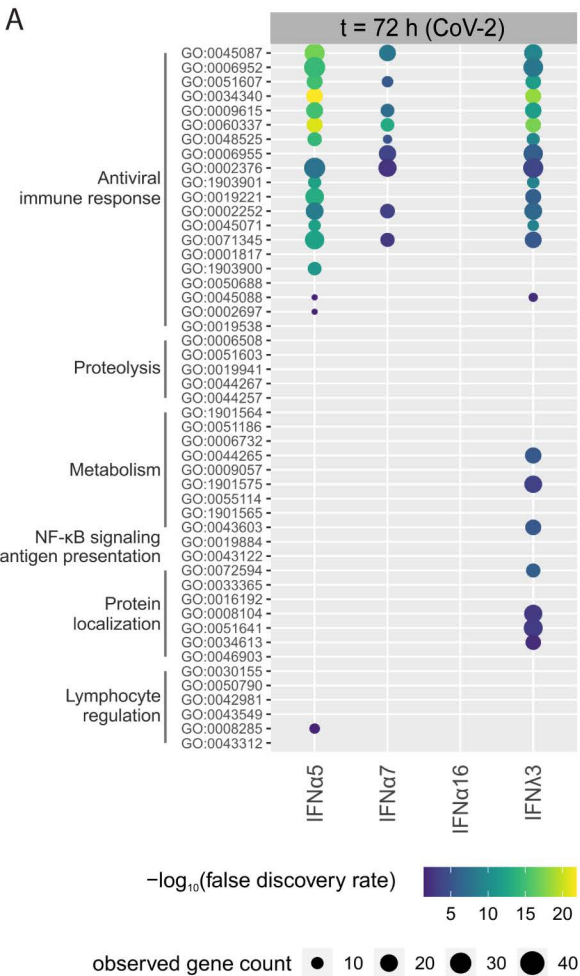

B

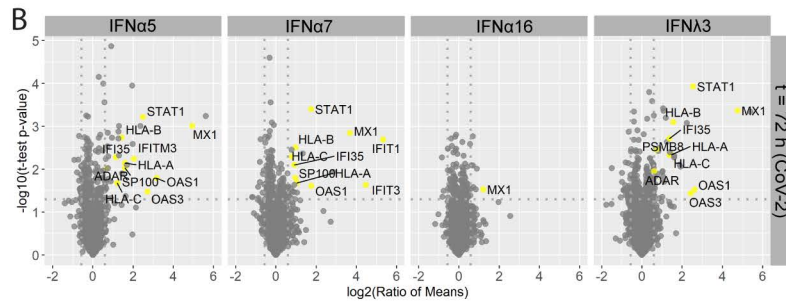

C

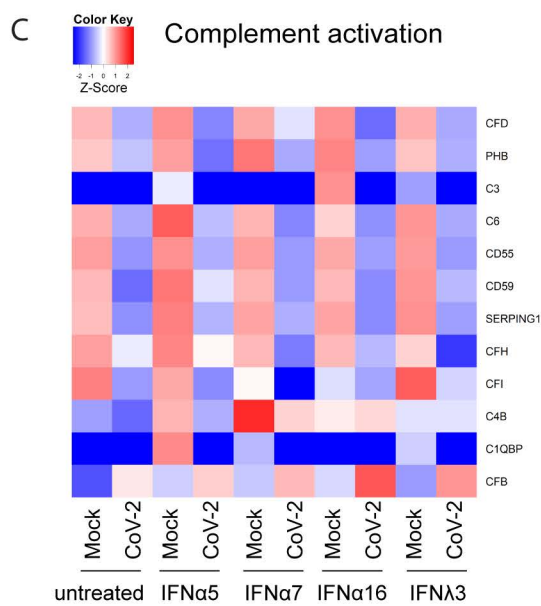

D

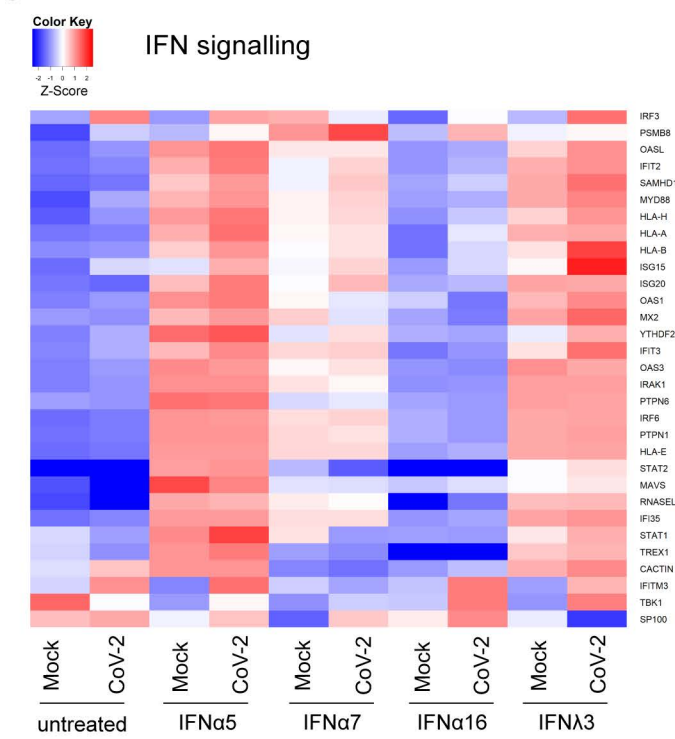

E

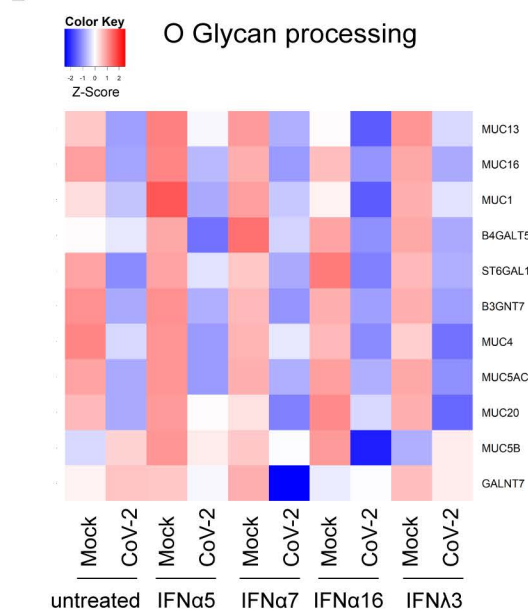

**Supplementary Fig. 7: IFN signature did not change upon SARS-CoV-2 infection**

(A-E) Proteomic analysis of IFN-treated and/or SARS-CoV-2-infected hAECs. (A) Biological processes induced by IFNs in SARS-CoV-2-infected hAECs at 88 h p. treatment (t=72 h (CoV-2)). (B) Volcano plots of IFN-treated SARS-CoV-2-infected hAECs (t=72 h (CoV-2)) Detected ISGs are coloured yellow. Heatmaps displaying differentially expressed proteins which are associated with complement activation (C) IFN signalling (D) and O glycan processing (E). Comparisons of IFN-treated mock or SARS-CoV-2 infected hAECs at 72 h p.i. are depicted. n=4.





### **Supplementary Fig. 8: Therapeutic potential of combination treatment**

(A) Pre- and post-treatments of VeroE6 cells with remdesivir analysed by icELISA (black bars) and TCID<sub>50</sub> assay (white bars) shown as mean values + SEM. (B) Single and combined pre-treatments of IFN $\alpha$ 5, IFN $\alpha$ 2 and remdesivir in SARS-CoV-2 infected VeroE6 cells. Cell viability (%) normalised to untreated control (100%) is shown as heatmap. n=3. \* p<0.05; \*\* p<0.01.

**Supplementary Table 1 - SARS-CoV-2 Identifications**

SARS-CoV2-Proteins and Peptides identified in T = 72 h +CoV2

**Proteins**

| Donor 1   |       |       |        |       | Donor 2   |       |       |        |       | Donor 3   |       |       |        |       | Donor 4   |       |       |        |       | Unique peptides | Sequence coverage |        | UniProt ID | Protein Names | Gene |      |        |        |                    |   |
|-----------|-------|-------|--------|-------|-----------|-------|-------|--------|-------|-----------|-------|-------|--------|-------|-----------|-------|-------|--------|-------|-----------------|-------------------|--------|------------|---------------|------|------|--------|--------|--------------------|---|
| untreated | IFNα5 | IFNα7 | IFNα16 | IFNα3 | untreated | IFNα5 | IFNα7 | IFNα16 | IFNα3 | untreated | IFNα5 | IFNα7 | IFNα16 | IFNα3 | untreated | IFNα5 | IFNα7 | IFNα16 | IFNα3 |                 | [%]               | Score  |            |               |      |      |        |        |                    |   |
| 0         | 0     | 0     | 0      | 0     | 0         | 0     | 0     | 0      | 0     | 0         | 0     | 0     | 0      | 0     | 0         | 0     | 0     | 0      | 0     | 9               | 0                 | 0      | 0          | 0             | 8    | 6.7  | 45.809 | P0DTC2 | Spike glycoprotein | S |
| 0         | 0     | 0     | 0      | 0     | 0         | 0     | 0     | 0      | 0     | 0         | 0     | 0     | 0      | 0     | 0         | 0     | 0     | 0      | 0     | 2               | 0                 | 0      | 1          | 0             | 2    | 13.1 | 14.591 | P0DTC5 | Membrane protein   | M |
| 1         | 0     | 0     | 2      | 0     | 8         | 0     | 0     | 2      | 0     | 1         | 0     | 0     | 3      | 0     | 27        | 0     | 3     | 14     | 0     | 17              | 57                | 323.31 | P0DTC9     | Nucleoprotein | N    |      |        |        |                    |   |

**Peptides**

| Donor 1   |       |       |        |       | Donor 2   |       |       |        |       | Donor 3   |       |       |        |       | Donor 4   |       |       |        |       | Protein Name | Missed    |        | UniProt ID | Sequence                  |                      |
|-----------|-------|-------|--------|-------|-----------|-------|-------|--------|-------|-----------|-------|-------|--------|-------|-----------|-------|-------|--------|-------|--------------|-----------|--------|------------|---------------------------|----------------------|
| untreated | IFNα5 | IFNα7 | IFNα16 | IFNα3 | untreated | IFNα5 | IFNα7 | IFNα16 | IFNα3 | untreated | IFNα5 | IFNα7 | IFNα16 | IFNα3 | untreated | IFNα5 | IFNα7 | IFNα16 | IFNα3 |              | cleavages | Score  |            |                           |                      |
| 0         | 0     | 0     | 0      | 0     | 0         | 0     | 0     | 0      | 0     | 0         | 0     | 0     | 0      | 0     | 1         | 0     | 0     | 0      | 0     | 0            | 0         | 0      | 125.25     | P0DTC2                    | FASVYAWNRR           |
| 0         | 0     | 0     | 0      | 0     | 0         | 0     | 0     | 0      | 0     | 0         | 0     | 0     | 0      | 0     | 1         | 0     | 0     | 0      | 0     | 0            | 0         | 0      | 135.87     | P0DTC2                    | FLPFQQFGR            |
| 0         | 0     | 0     | 0      | 0     | 1         | 0     | 0     | 0      | 0     | 0         | 0     | 0     | 0      | 0     | 1         | 0     | 0     | 0      | 0     | 0            | 0         | 0      | 96.034     | P0DTC2                    | FQTLALHR             |
| 0         | 0     | 0     | 0      | 0     | 0         | 0     | 0     | 0      | 0     | 0         | 0     | 0     | 0      | 0     | 2         | 0     | 0     | 1      | 0     | 0            | 0         | 0      | 215.72     | P0DTC2                    | LQSLQTYVTQLIR        |
| 0         | 0     | 0     | 0      | 0     | 0         | 0     | 0     | 0      | 0     | 0         | 0     | 0     | 0      | 0     | 1         | 0     | 0     | 0      | 0     | 0            | 0         | 0      | 93.551     | P0DTC2                    | SFIEDLLFNK           |
| 0         | 0     | 0     | 0      | 0     | 0         | 0     | 0     | 0      | 0     | 0         | 0     | 0     | 0      | 0     | 1         | 0     | 0     | 0      | 0     | 0            | 0         | 0      | 130.01     | P0DTC2                    | TQLPPAYTNSFTR        |
| 0         | 0     | 0     | 0      | 0     | 0         | 0     | 0     | 0      | 0     | 0         | 0     | 0     | 0      | 0     | 1         | 0     | 0     | 0      | 0     | 0            | 0         | 0      | 101.33     | P0DTC2                    | VQPTESIVR            |
| 0         | 0     | 0     | 0      | 0     | 0         | 0     | 0     | 0      | 0     | 0         | 0     | 0     | 0      | 0     | 1         | 0     | 0     | 0      | 0     | 0            | 0         | 0      | 207.34     | P0DTC2                    | VYSTGSNVFQTR         |
| 0         | 0     | 0     | 0      | 0     | 0         | 0     | 0     | 0      | 0     | 0         | 0     | 0     | 0      | 0     | 1         | 0     | 0     | 0      | 0     | 0            | 0         | 0      | 160.56     | P0DTC5                    | LNTDHSSSDNIALLVQ     |
| 0         | 0     | 0     | 0      | 0     | 0         | 0     | 0     | 0      | 0     | 0         | 0     | 0     | 0      | 0     | 1         | 0     | 0     | 1      | 0     | 0            | 0         | 0      | 171.33     | P0DTC5                    | VAGDSGFAAYSR         |
| 0         | 0     | 0     | 0      | 0     | 0         | 0     | 0     | 0      | 0     | 0         | 0     | 0     | 0      | 0     | 1         | 0     | 0     | 1      | 0     | 0            | 0         | 0      | 168.08     | P0DTC9                    | AYNVTQAFGR           |
| 0         | 0     | 0     | 0      | 0     | 1         | 0     | 0     | 0      | 0     | 0         | 0     | 0     | 0      | 0     | 1         | 0     | 0     | 0      | 0     | 0            | 0         | 0      | 131.06     | P0DTC9                    | DGIIVVATEGALNTPK     |
| 0         | 0     | 0     | 0      | 0     | 0         | 0     | 0     | 0      | 0     | 0         | 0     | 0     | 0      | 0     | 1         | 0     | 0     | 0      | 0     | 0            | 1         | 63.893 | P0DTC9     | DHIGTRNPANNAIVLQLPQGTTLPK |                      |
| 0         | 0     | 0     | 0      | 0     | 0         | 0     | 0     | 0      | 0     | 0         | 0     | 0     | 0      | 0     | 1         | 0     | 0     | 1      | 0     | 0            | 0         | 0      | 357.53     | P0DTC9                    | GPEQTQGNFGDQELIR     |
| 0         | 0     | 0     | 0      | 0     | 0         | 0     | 0     | 0      | 0     | 0         | 0     | 0     | 0      | 0     | 1         | 0     | 0     | 1      | 0     | 0            | 0         | 0      | 266.97     | P0DTC9                    | GQGVPIINTSSPDDQIGYRR |
| 0         | 0     | 0     | 0      | 0     | 0         | 0     | 0     | 0      | 0     | 0         | 0     | 0     | 0      | 0     | 2         | 0     | 1     | 2      | 0     | 0            | 1         | 334.6  | P0DTC9     | GQGVPIINTSSPDDQIGYRR      |                      |
| 0         | 0     | 0     | 0      | 0     | 0         | 0     | 0     | 0      | 0     | 0         | 0     | 0     | 0      | 0     | 1         | 0     | 0     | 0      | 0     | 0            | 0         | 0      | 111.77     | P0DTC9                    | IGMEVTPSGTWLTYTGAIK  |
| 1         | 0     | 0     | 1      | 0     | 1         | 0     | 0     | 1      | 0     | 1         | 0     | 0     | 1      | 0     | 2         | 0     | 1     | 2      | 0     | 0            | 0         | 0      | 332.96     | P0DTC9                    | ITFGGSDSTGSNQNGER    |
| 0         | 0     | 0     | 0      | 0     | 0         | 0     | 0     | 0      | 0     | 0         | 0     | 0     | 0      | 0     | 1         | 0     | 0     | 0      | 0     | 1            | 1         | 145.52 | P0DTC9     | ITFGGSDSTGSNQNGERSGAR     |                      |
| 0         | 0     | 0     | 0      | 0     | 1         | 0     | 0     | 0      | 0     | 0         | 0     | 0     | 0      | 0     | 1         | 0     | 0     | 0      | 0     | 0            | 0         | 0      | 161.76     | P0DTC9                    | MAGNGGDAALALLLDR     |
| 0         | 0     | 0     | 0      | 0     | 0         | 0     | 0     | 0      | 0     | 0         | 0     | 0     | 0      | 0     | 2         | 0     | 0     | 1      | 0     | 1            | 1         | 219.04 | P0DTC9     | MAGNGGDAALALLLDRLNQLESK   |                      |
| 0         | 0     | 0     | 0      | 0     | 2         | 0     | 0     | 0      | 0     | 0         | 0     | 0     | 0      | 0     | 2         | 0     | 0     | 2      | 0     | 0            | 0         | 0      | 304.42     | P0DTC9                    | NPANNAIVLQLPQGTTLPK  |
| 0         | 0     | 0     | 0      | 0     | 0         | 0     | 0     | 0      | 0     | 0         | 0     | 0     | 0      | 0     | 2         | 0     | 0     | 1      | 0     | 1            | 1         | 135.69 | P0DTC9     | QGTDYKHWPIAQFAPSASAFFGMSR |                      |
| 0         | 0     | 0     | 0      | 0     | 1         | 0     | 0     | 0      | 0     | 0         | 0     | 0     | 0      | 0     | 2         | 0     | 0     | 0      | 0     | 0            | 0         | 0      | 126.63     | P0DTC9                    | QQTVTLLPAADLDDFSK    |
| 0         | 0     | 0     | 1      | 0     | 2         | 0     | 0     | 1      | 0     | 0         | 0     | 0     | 2      | 0     | 3         | 0     | 1     | 2      | 0     | 1            | 1         | 363.83 | P0DTC9     | RGPEQTQGNFGDQELIR         |                      |
| 0         | 0     | 0     | 0      | 0     | 0         | 0     | 0     | 0      | 0     | 0         | 0     | 0     | 0      | 0     | 1         | 0     | 0     | 0      | 0     | 1            | 1         | 107.06 | P0DTC9     | RPQGLPNNTASWFTALTQHGK     |                      |
| 0         | 0     | 0     | 0      | 0     | 0         | 0     | 0     | 0      | 0     | 0         | 0     | 0     | 0      | 0     | 1         | 0     | 0     | 0      | 0     | 1            | 1         | 152.69 | P0DTC9     | WYFYLLGTGPEAGLPYGANK      |                      |

## Supplementary Table 2- Table of Contents - Significantly Differentially Abundant Proteins and On-Off Proteins

Filter criteria for significantly differentially abundant proteins:  $\geq 2$  unique peptides, p-value  $\leq 0.05$ , ratio of means  $\leq 0.67$  or  $\geq 1.5$

Filter criteria for On-Off proteins: Quantified in minimum 3 of 4 samples of one experimental group but not the opposed group

| Table No. | Content                                       |                                                       |
|-----------|-----------------------------------------------|-------------------------------------------------------|
| 1         | T = 0 h, IFN $\alpha$ 5 / Untreated           | <b>Significantly Differentially Abundant Proteins</b> |
| 2         | T = 0 h, IFN $\alpha$ 7 / Untreated           |                                                       |
| 3         | T = 0 h, IFN $\alpha$ 16 / Untreated          |                                                       |
| 4         | T = 0 h, IFN $\lambda$ 3 / Untreated          |                                                       |
| 5         | T = 72 h (CoV-2), IFN $\alpha$ 5 / Untreated  |                                                       |
| 6         | T = 72 h (CoV-2), IFN $\alpha$ 7 / Untreated  |                                                       |
| 7         | T = 72 h (CoV-2), IFN $\alpha$ 16 / Untreated |                                                       |
| 8         | T = 72 h (CoV-2), IFN $\lambda$ 3 / Untreated |                                                       |
| 9         | T = 72 h (mock) IFN $\alpha$ 5 / Untreated    |                                                       |
| 10        | T = 72 h (mock) IFN $\alpha$ 7 / Untreated    |                                                       |
| 11        | T = 72 h (mock) IFN $\alpha$ 16 / Untreated   |                                                       |
| 12        | T = 72 h (mock) IFN $\lambda$ 3 / Untreated   |                                                       |
| 13        | T = 72 h, Untreated: CoV-2 / mock             |                                                       |
| 14        | T = 72 h, IFN $\alpha$ 5: CoV-2 / mock        |                                                       |
| 15        | T = 72 h, IFN $\alpha$ 7: CoV-2 / mock        |                                                       |
| 16        | T = 72 h, IFN $\alpha$ 16: CoV-2 / mock       |                                                       |
| 17        | T = 72 h, IFN $\lambda$ 3: CoV-2 / mock       |                                                       |
| 18        | T = 0 h, IFN / Untreated                      | <b>On-Off Proteins</b>                                |
| 19        | T = 72h, (mock) IFN / Untreated               |                                                       |
| 20        | T = 72h, (CoV-2) IFN / Untreated              |                                                       |
| 21        | T = 72 h, CoV-2 / mock                        |                                                       |

**T = 0 h, IFN $\alpha$ 5 / Untreated**

| Uniprot ID    | Protein Name                                                                                                  | Gene Names | Number of Proteins | Peptides | Unique Peptides | p-Value     | P <sub>FDR</sub> -Value | Ratio of Means (IFN $\alpha$ 5 / Untreated) |
|---------------|---------------------------------------------------------------------------------------------------------------|------------|--------------------|----------|-----------------|-------------|-------------------------|---------------------------------------------|
| O14936        | Peripheral plasma membrane protein CASK                                                                       | CASK       | 1                  | 5        | 5               | 0.020456521 | 0.84431694              | 0.542236659                                 |
| O75822        | Eukaryotic translation initiation factor 3 subunit J                                                          | EIF3J      | 1                  | 4        | 4               | 0.024531672 | 0.84431694              | 1.91985968                                  |
| P01011        | Alpha-1-antichymotrypsin;Alpha-1-antichymotrypsin His-Pro-less                                                | SERPINA3   | 1                  | 6        | 6               | 0.027008694 | 0.890554595             | 2.785607202                                 |
| P01889        | HLA class I histocompatibility antigen, B-7 alpha chain                                                       | HLA-B      | 1                  | 20       | 14              | 0.008017178 | 0.631261967             | 2.049845485                                 |
| P04179        | Superoxide dismutase [Mn], mitochondrial                                                                      | SOD2       | 1                  | 3        | 3               | 0.03648489  | 0.965633426             | 0.605294367                                 |
| P05161        | Ubiquitin-like protein ISG15                                                                                  | ISG15      | 1                  | 8        | 8               | 0.000648287 | 0.428950212             | 93.57554337                                 |
| P19835        | Bile salt-activated lipase                                                                                    | CEL        | 1                  | 11       | 11              | 0.004755993 | 0.631261967             | 1.525145936                                 |
| P19971        | Thymidine phosphorylase                                                                                       | TYMP       | 1                  | 23       | 23              | 0.008805867 | 0.631261967             | 1.865603649                                 |
| P20591        | Interferon-induced GTP-binding protein Mx1;Interferon-induced GTP-binding protein Mx1, N-terminally processed | MX1        | 1                  | 48       | 45              | 0.007809488 | 0.631261967             | 51.35881486                                 |
| P22307        | Non-specific lipid-transfer protein                                                                           | SCP2       | 1                  | 14       | 14              | 0.03789953  | 0.984775951             | 0.623100979                                 |
| P23381        | Tryptophan--tRNA ligase, cytoplasmic;T1-TrpRS;T2-TrpRS                                                        | WARS       | 1                  | 28       | 28              | 0.012957478 | 0.730963468             | 2.988231399                                 |
| P23497;Q9H930 | Nuclear autoantigen Sp-100                                                                                    | SP100      | 2                  | 10       | 10              | 0.020979763 | 0.84431694              | 1.702977673                                 |
| P23786        | Carnitine O-palmitoyltransferase 2, mitochondrial                                                             | CPT2       | 1                  | 9        | 9               | 0.005284026 | 0.631261967             | 0.612087895                                 |
| P29590        | Protein PML                                                                                                   | PML        | 1                  | 33       | 33              | 0.023796771 | 0.84431694              | 1.531604171                                 |
| P42224        | Signal transducer and activator of transcription 1-alpha/beta                                                 | STAT1      | 1                  | 35       | 35              | 0.002537616 | 0.503716758             | 3.07857135                                  |
| P50914        | 60S ribosomal protein L14                                                                                     | RPL14      | 1                  | 6        | 6               | 0.030617007 | 0.902257482             | 0.489846341                                 |
| P80217        | Interferon-induced 35 kDa protein                                                                             | IFI35      | 1                  | 10       | 10              | 0.013294489 | 0.730963468             | 1.967553753                                 |
| Q01804        | OTU domain-containing protein 4                                                                               | OTUD4      | 1                  | 2        | 2               | 0.036071231 | 0.965633426             | 0.660048181                                 |
| Q53GL7        | Poly [ADP-ribose] polymerase 10                                                                               | PARP10     | 1                  | 17       | 17              | 0.001297938 | 0.502711544             | 2.969708897                                 |
| Q63HN8        | E3 ubiquitin-protein ligase RNF213                                                                            | RNF213     | 1                  | 28       | 28              | 0.007089235 | 0.631261967             | 1.701118454                                 |
| Q7Z2W4        | Zinc finger CCCH-type antiviral protein 1                                                                     | ZC3HAV1    | 1                  | 10       | 9               | 0.015836805 | 0.748477576             | 1.506922458                                 |
| Q969L2        | Protein MAL2                                                                                                  | MAL2       | 1                  | 2        | 2               | 0.027504833 | 0.890554595             | 0.654500339                                 |
| Q96AZ6        | Interferon-stimulated gene 20 kDa protein                                                                     | ISG20      | 1                  | 6        | 6               | 0.011464435 | 0.730963468             | 10.40730141                                 |
| Q96PP9;Q8N8V2 | Guanylate-binding protein 4                                                                                   | GBP4       | 2                  | 6        | 4               | 0.008904451 | 0.631261967             | 7.09646995                                  |
| Q9BQE5        | Apolipoprotein L2                                                                                             | APOL2      | 1                  | 4        | 4               | 0.048692475 | 0.984775951             | 1.818077829                                 |
| Q9H6T3        | RNA polymerase II-associated protein 3                                                                        | RPAP3      | 1                  | 3        | 3               | 0.013732675 | 0.730963468             | 1.627748837                                 |
| Q9NUQ6        | SPATS2-like protein                                                                                           | SPATS2L    | 1                  | 7        | 7               | 0.029536604 | 0.896758819             | 2.506981089                                 |
| Q9NZT2        | Opioid growth factor receptor                                                                                 | OGFR       | 1                  | 10       | 10              | 0.011434157 | 0.730963468             | 1.514649802                                 |
| Q9Y547        | Intraflagellar transport protein 25 homolog                                                                   | HSPB11     | 1                  | 4        | 4               | 0.000261679 | 0.259716203             | 1.584021184                                 |

**T = 0 h, IFN $\alpha$ 7 / Untreated**

| Uniprot ID                  | Protein Name                                                                                                                  | Gene Names                   | Number of Proteins | Peptides | Unique Peptides | p-Value     | P <sub>FDR</sub> -Value | Ratio of Means (IFN $\alpha$ 7 / Untreated) |
|-----------------------------|-------------------------------------------------------------------------------------------------------------------------------|------------------------------|--------------------|----------|-----------------|-------------|-------------------------|---------------------------------------------|
| O00410                      | Importin-5                                                                                                                    | IPO5                         | 1                  | 14       | 13              | 0.011047308 | 0.840858667             | 1.621904254                                 |
| O75190;Q8NHS0;Q8WWF6;Q7Z6W7 | Dnal homolog subfamily B member 6                                                                                             | DNAJB6                       | 4                  | 7        | 6               | 0.005558028 | 0.803984849             | 0.618819474                                 |
| O75882                      | Attractin                                                                                                                     | ATRN                         | 1                  | 8        | 8               | 0.032813423 | 0.920368351             | 1.501833728                                 |
| P00387                      | NADH-cytochrome b5 reductase 3;NADH-cytochrome b5 reductase 3 membrane-bound form;NADH-cytochrome b5 reductase 3 soluble form | CYB5R3                       | 1                  | 9        | 9               | 0.020970918 | 0.845256394             | 0.583174242                                 |
| P01889                      | HLA class I histocompatibility antigen, B-7 alpha chain                                                                       | HLA-B                        | 1                  | 20       | 14              | 0.013591114 | 0.840858667             | 1.679458267                                 |
| P05161                      | Ubiquitin-like protein ISG15                                                                                                  | ISG15                        | 1                  | 8        | 8               | 0.030162483 | 0.920368351             | 15.66435228                                 |
| P08237                      | ATP-dependent 6-phosphofructokinase, muscle type                                                                              | PFKM                         | 1                  | 6        | 4               | 0.032934536 | 0.920368351             | 0.620291377                                 |
| P13987                      | CD59 glycoprotein                                                                                                             | CD59                         | 1                  | 4        | 4               | 0.011584884 | 0.840858667             | 2.212132671                                 |
| P20591                      | Interferon-induced GTP-binding protein Mx1;Interferon-induced GTP-binding protein Mx1, N-terminally processed                 | MX1                          | 1                  | 48       | 45              | 0.010808667 | 0.840858667             | 27.92299594                                 |
| P42224                      | Signal transducer and activator of transcription 1-alpha/beta                                                                 | STAT1                        | 1                  | 35       | 35              | 0.009162757 | 0.840858667             | 2.371970655                                 |
| P62995                      | Transformer-2 protein homolog beta                                                                                            | TRA2B                        | 1                  | 11       | 11              | 0.040746412 | 0.944882106             | 1.711326967                                 |
| P80217                      | Interferon-induced 35 kDa protein                                                                                             | IFI35                        | 1                  | 10       | 10              | 0.011422429 | 0.840858667             | 1.618444791                                 |
| Q53GL7                      | Poly [ADP-ribose] polymerase 10                                                                                               | PARP10                       | 1                  | 17       | 17              | 0.006319777 | 0.803984849             | 1.628792736                                 |
| Q63HN8                      | E3 ubiquitin-protein ligase RNF213                                                                                            | RNF213                       | 1                  | 28       | 28              | 0.01112852  | 0.840858667             | 1.524826052                                 |
| Q8N0W3                      | L-fucose kinase                                                                                                               | FUK                          | 1                  | 5        | 5               | 0.017410091 | 0.840858667             | 0.591535642                                 |
| Q92973                      | Transportin-1                                                                                                                 | TNPO1                        | 1                  | 12       | 8               | 0.026164845 | 0.896954874             | 0.543765238                                 |
| Q93008;O00507               | Probable ubiquitin carboxyl-terminal hydrolase FAF-X                                                                          | USP9X                        | 2                  | 11       | 11              | 0.016082335 | 0.840858667             | 0.572809833                                 |
| Q93077;Q7L7L0;P04908        | Histone H2A type 1-C;Histone H2A type 3;Histone H2A type 1-B/E                                                                | HIST1H2AC;HIST3H2A;HIST1H2AB | 3                  | 8        | 2               | 0.048720946 | 0.944882106             | 0.440027011                                 |
| Q96CV9                      | Optineurin                                                                                                                    | OPTN                         | 1                  | 5        | 5               | 0.002914805 | 0.648302369             | 1.889483476                                 |
| Q9BT78                      | COP9 signalosome complex subunit 4                                                                                            | COPS4                        | 1                  | 9        | 9               | 0.006507057 | 0.803984849             | 0.616335508                                 |
| Q9Y6I3                      | Epsin-1                                                                                                                       | EPN1                         | 1                  | 4        | 4               | 0.015876157 | 0.840858667             | 0.658594883                                 |

**T = 0 h, IFN $\alpha$ 16 / Untreated**

| Uniprot ID    | Protein Name                                                                                                                                                   | Gene Names      | Number of Proteins | Peptides | Unique Peptides | p-Value     | p <sub>FDR</sub> -Value | Ratio of Means (IFN $\alpha$ 16 / Untreated) |
|---------------|----------------------------------------------------------------------------------------------------------------------------------------------------------------|-----------------|--------------------|----------|-----------------|-------------|-------------------------|----------------------------------------------|
| Q71UI9;POC0S5 | Histone H2A.V;Histone H2A.Z                                                                                                                                    | H2AFV;H2AFZ     | 2                  | 5        | 3               | 0.013397682 | 0.763419391             | 2.885149603                                  |
| P18510        | Interleukin-1 receptor antagonist protein                                                                                                                      | IL1RN           | 1                  | 5        | 5               | 0.046429593 | 0.960754525             | 0.630356021                                  |
| P29992        | Guanine nucleotide-binding protein subunit alpha-11                                                                                                            | GNA11           | 1                  | 10       | 4               | 0.017690874 | 0.885904519             | 1.742449141                                  |
| P49593        | Protein phosphatase 1F                                                                                                                                         | PPM1F           | 1                  | 5        | 5               | 0.004307646 | 0.579440325             | 0.649655333                                  |
| P49959        | Double-strand break repair protein MRE11A                                                                                                                      | MRE11A          | 1                  | 7        | 7               | 0.029686516 | 0.944605204             | 0.606533458                                  |
| Q15257        | Serine/threonine-protein phosphatase 2A activator                                                                                                              | PPP2R4          | 1                  | 6        | 6               | 0.002087308 | 0.566644077             | 0.659362749                                  |
| Q9Y6H1;Q5T1J5 | Coiled-coil-helix-coiled-coil-helix domain-containing protein 2;Putative coiled-coil-helix-coiled-coil-helix domain-containing protein CHCHD2P9, mitochondrial | CHCHD2;CHCHD2P9 | 2                  | 4        | 4               | 0.047589903 | 0.960754525             | 1.523655058                                  |
| Q92743        | Serine protease HTRA1                                                                                                                                          | HTRA1           | 1                  | 5        | 5               | 0.032781891 | 0.944605204             | 0.631404114                                  |
| Q92934        | Bcl2-associated agonist of cell death                                                                                                                          | BAD             | 1                  | 7        | 7               | 0.010330244 | 0.706801765             | 1.579682649                                  |
| Q92973        | Transportin-1                                                                                                                                                  | TNPO1           | 1                  | 12       | 8               | 0.030543812 | 0.944605204             | 0.544353394                                  |
| Q9P2B2        | Prostaglandin F2 receptor negative regulator                                                                                                                   | PTGFRN          | 1                  | 6        | 6               | 0.004747079 | 0.579440325             | 0.6561842                                    |

T = 0 h, IFN $\lambda$ 3  
/ Untreated

| Uniprot ID                          | Protein Name                                                                                                                  | Gene Names                            | Number of Proteins | Peptides | Unique Peptides | p-Value     | P <sub>FDR</sub> -Value | Ratio of Means (IFN $\lambda$ 3 / Untreated) |
|-------------------------------------|-------------------------------------------------------------------------------------------------------------------------------|---------------------------------------|--------------------|----------|-----------------|-------------|-------------------------|----------------------------------------------|
| O60218                              | Aldo-keto reductase family 1 member B10                                                                                       | AKR1B10                               | 1                  | 9        | 7               | 0.008513172 | 0.788171565             | 0.592971555                                  |
| P00387                              | NADH-cytochrome b5 reductase 3;NADH-cytochrome b5 reductase 3 membrane-bound form;NADH-cytochrome b5 reductase 3 soluble form | CYB5R3                                | 1                  | 9        | 9               | 0.047753359 | 0.920209345             | 0.562559919                                  |
| P01889                              | HLA class I histocompatibility antigen, B-7 alpha chain                                                                       | HLA-B                                 | 1                  | 20       | 14              | 0.015174014 | 0.788171565             | 1.673608522                                  |
| P05161                              | Ubiquitin-like protein ISG15                                                                                                  | ISG15                                 | 1                  | 8        | 8               | 0.007703968 | 0.788171565             | 25.59960899                                  |
| P11177                              | Pyruvate dehydrogenase E1 component subunit beta, mitochondrial                                                               | PDHB                                  | 1                  | 9        | 9               | 0.04917172  | 0.920209345             | 0.657947342                                  |
| P13073                              | Cytochrome c oxidase subunit 4 isoform 1, mitochondrial                                                                       | COX41                                 | 1                  | 7        | 7               | 9.68211E-05 | 0.144592217             | 0.640600359                                  |
| P14550                              | Alcohol dehydrogenase [NADP(+)]                                                                                               | AKR1A1                                | 1                  | 22       | 22              | 0.036341199 | 0.916364839             | 0.666338713                                  |
| P20591                              | Interferon-induced GTP-binding protein Mx1;Interferon-induced GTP-binding protein Mx1, N-terminally processed                 | MX1                                   | 1                  | 48       | 45              | 0.011446164 | 0.788171565             | 33.66804943                                  |
| P40926                              | Malate dehydrogenase, mitochondrial                                                                                           | MDH2                                  | 1                  | 15       | 15              | 0.001390873 | 0.506810306             | 0.646274878                                  |
| P42224                              | Signal transducer and activator of transcription 1-alpha/beta                                                                 | STAT1                                 | 1                  | 35       | 35              | 0.010146187 | 0.788171565             | 2.623099718                                  |
| P43155                              | Carnitine O-acetyltransferase                                                                                                 | CRAT                                  | 1                  | 3        | 3               | 0.045871609 | 0.920209345             | 0.435731703                                  |
| P68431;P84243;Q71D13;Q16695;Q6NX T2 | Histone H3.1;Histone H3.3;Histone H3.2;Histone H3.1t;Histone H3.3C                                                            | HIST1H3A;H3F3A;HIST2H3A;HIST3H3;H3F3C | 5                  | 8        | 8               | 0.039068219 | 0.91824849              | 0.631374888                                  |
| P78406                              | mRNA export factor                                                                                                            | RAE1                                  | 1                  | 6        | 6               | 0.002573102 | 0.577895937             | 0.598296535                                  |
| P80217                              | Interferon-induced 35 kDa protein                                                                                             | IFI35                                 | 1                  | 10       | 10              | 0.010962395 | 0.788171565             | 2.072933639                                  |
| Q06830                              | Peroxisome oxidin-1                                                                                                           | PRDX1                                 | 1                  | 24       | 21              | 0.010260691 | 0.788171565             | 0.666315637                                  |
| Q53GL7                              | Poly [ADP-ribose] polymerase 10                                                                                               | PARP10                                | 1                  | 17       | 17              | 0.012791252 | 0.788171565             | 2.834795096                                  |
| Q8IW45                              | ATP-dependent (S)-NAD(P)H-hydrate dehydratase                                                                                 | CARKD                                 | 1                  | 5        | 5               | 0.017850244 | 0.788171565             | 1.537650653                                  |
| Q8WUY1                              | Protein THEM6                                                                                                                 | THEM6                                 | 1                  | 5        | 5               | 0.046230562 | 0.920209345             | 0.616201183                                  |
| Q92925;Q96GM5;Q6STE5                | SWI/SNF-related matrix-associated actin-dependent regulator of chromatin subfamily D member 2                                 | SMARCD2                               | 3                  | 7        | 7               | 0.043896516 | 0.920209345             | 1.737795345                                  |
| Q96AZ6                              | Interferon-stimulated gene 20 kDa protein                                                                                     | ISG20                                 | 1                  | 6        | 6               | 0.003269987 | 0.577895937             | 3.291570345                                  |
| Q96RQ3                              | Methylcrotonoyl-CoA carboxylase subunit alpha, mitochondrial                                                                  | MCCC1                                 | 1                  | 10       | 10              | 0.041920719 | 0.920209345             | 0.632200764                                  |
| Q9NRC6                              | Spectrin beta chain, non-erythrocytic 5                                                                                       | SPTBN5                                | 1                  | 3        | 3               | 0.013066786 | 0.788171565             | 1.618321585                                  |

T = 72 h (CoV-2), IFN $\alpha$ 5 / Untreated

| Uniprot ID                                                     | Protein Name                                                                                                                                                                | Gene Names                                                                         | Number of Proteins | Peptides | Unique Peptides | p-Value     | p <sub>FDR</sub> -Value | Ratio of Means (IFN $\alpha$ 5 / Untreated) |
|----------------------------------------------------------------|-----------------------------------------------------------------------------------------------------------------------------------------------------------------------------|------------------------------------------------------------------------------------|--------------------|----------|-----------------|-------------|-------------------------|---------------------------------------------|
| O00182                                                         | Galectin-9                                                                                                                                                                  | LGALS9                                                                             | 1                  | 11       | 8               | 0.024469544 | 0.449265335             | 1.504917534                                 |
| O00468                                                         | Agrin;Agrin N-terminal 110 kDa subunit;Agrin C-terminal 110 kDa subunit;Agrin C-terminal 90 kDa fragment;Agrin C-terminal 22 kDa                                            | AGRN                                                                               | 1                  | 34       | 34              | 0.00574231  | 0.263841253             | 1.551996998                                 |
| O14879                                                         | Interferon-induced protein with tetratricopeptide repeats 3                                                                                                                 | IFIT3                                                                              | 1                  | 25       | 25              | 0.017122469 | 0.383543299             | 80.63984248                                 |
| P00973                                                         | 2-5-oligoadenylate synthase 1                                                                                                                                               | OAS1                                                                               | 1                  | 9        | 9               | 0.016080942 | 0.379840471             | 9.028224832                                 |
| P01889                                                         | HLA class I histocompatibility antigen, B-7 alpha chain                                                                                                                     | HLA-B                                                                              | 1                  | 20       | 14              | 0.001823769 | 0.178265445             | 2.69898212                                  |
| P04439                                                         | HLA class I histocompatibility antigen, A-3 alpha chain                                                                                                                     | HLA-A                                                                              | 1                  | 20       | 13              | 0.007167454 | 0.293314288             | 3.018975491                                 |
| P09914;Q5T764                                                  | Interferon-induced protein with tetratricopeptide repeats 1                                                                                                                 | IFIT1                                                                              | 2                  | 25       | 24              | 0.00063248  | 0.134591684             | 128.771715                                  |
| Q6FI13;P0C0S8;Q99878;Q98TM1;Q16777;Q96KK5;P20671;P16104;Q96QV6 | Histone H2A type 2-A;Histone H2A type 1;Histone H2A type 1-J;Histone H2A.J;Histone H2A type 2-C;Histone H2A type 1-H;Histone H2A type 1-D;Histone H2AX;Histone H2A type 1-A | HIST2H2AA3;HIST1H2AG;HIST1H2AJ;H2AFJ;HIST2H2AC;HIST1H2AH;HIST1H2AD;H2AFX;HIST1H2AA | 9                  | 8        | 2               | 0.018563216 | 0.405161292             | 0.620387474                                 |
| P10321                                                         | HLA class I histocompatibility antigen, Cw-7 alpha chain                                                                                                                    | HLA-C                                                                              | 1                  | 16       | 10              | 0.020986854 | 0.413518749             | 2.306302985                                 |
| P13073                                                         | Cytochrome c oxidase subunit 4 isoform 1, mitochondrial                                                                                                                     | COX4I1                                                                             | 1                  | 7        | 7               | 0.034152601 | 0.457086384             | 0.655134513                                 |
| P19525                                                         | Interferon-induced, double-stranded RNA-activated protein kinase                                                                                                            | EIF2AK2                                                                            | 1                  | 13       | 13              | 0.012513862 | 0.337082246             | 2.727989372                                 |
| P19971                                                         | Thymidine phosphorylase                                                                                                                                                     | TYMP                                                                               | 1                  | 23       | 23              | 0.000989308 | 0.161942127             | 5.140175092                                 |
| P20591                                                         | Interferon-induced GTP-binding protein Mx1;Interferon-induced GTP-binding protein Mx1, N-terminally processed                                                               | MX1                                                                                | 1                  | 48       | 45              | 0.000969346 | 0.161942127             | 30.71400915                                 |
| P21980;O43548                                                  | Protein-glutamine gamma-glutamyltransferase 2                                                                                                                               | TGM2                                                                               | 2                  | 31       | 31              | 0.005046473 | 0.261924278             | 1.699879612                                 |
| P23381                                                         | Tryptophan--tRNA ligase, cytoplasmic;T1-TrpRS;T2-TrpRS                                                                                                                      | WARS                                                                               | 1                  | 28       | 28              | 0.000112939 | 0.060083622             | 3.87236415                                  |
| P23497;Q9H930                                                  | Nuclear autoantigen Sp-100                                                                                                                                                  | SP100                                                                              | 2                  | 10       | 10              | 0.009280017 | 0.32107976              | 3.016108827                                 |
| P28065                                                         | Proteasome subunit beta type-9                                                                                                                                              | PSMB9                                                                              | 1                  | 10       | 10              | 0.001835203 | 0.178265445             | 1.92455023                                  |
| P28072                                                         | Proteasome subunit beta type-6                                                                                                                                              | PSMB6                                                                              | 1                  | 7        | 7               | 0.001675991 | 0.178265445             | 0.623422384                                 |
| P28074                                                         | Proteasome subunit beta type-5                                                                                                                                              | PSMB5                                                                              | 1                  | 9        | 9               | 0.00601856  | 0.263841253             | 0.60640131                                  |
| P28838                                                         | Cytosol aminopeptidase                                                                                                                                                      | LAP3                                                                               | 1                  | 32       | 32              | 0.001316233 | 0.178265445             | 2.419504104                                 |
| P29466;Q5EG05                                                  | Caspase-1;Caspase-1 subunit p20;Caspase-1 subunit p10                                                                                                                       | CASP1                                                                              | 2                  | 11       | 11              | 1.3557E-05  | 0.028849216             | 1.889806322                                 |
| P29590                                                         | Protein PML                                                                                                                                                                 | PML                                                                                | 1                  | 33       | 33              | 0.001918108 | 0.178265445             | 2.419340576                                 |
| P42224                                                         | Signal transducer and activator of transcription 1-alpha/beta                                                                                                               | STAT1                                                                              | 1                  | 35       | 35              | 0.000603523 | 0.134591684             | 5.609034351                                 |
| P55265                                                         | Double-stranded RNA-specific adenosine deaminase                                                                                                                            | ADAR                                                                               | 1                  | 19       | 19              | 0.009421842 | 0.32107976              | 1.603790329                                 |
| P57076                                                         | UPF0769 protein C21orf59                                                                                                                                                    | C21orf59                                                                           | 1                  | 5        | 5               | 0.048535775 | 0.487189286             | 0.645175066                                 |
| P80217                                                         | Interferon-induced 35 kDa protein                                                                                                                                           | IFI35                                                                              | 1                  | 10       | 10              | 0.005256076 | 0.263841253             | 2.205278328                                 |
| Q01628;C9JQL5                                                  | Interferon-induced transmembrane protein 3                                                                                                                                  | IFITM3                                                                             | 2                  | 4        | 2               | 0.005690281 | 0.263841253             | 4.124111782                                 |
| Q08380                                                         | Galectin-3-binding protein                                                                                                                                                  | LGALS3BP                                                                           | 1                  | 25       | 25              | 0.001414987 | 0.178265445             | 1.670650391                                 |
| Q08AF3;Q7Z7L1;Q68D06                                           | Schlafen family member 5                                                                                                                                                    | SLFN5                                                                              | 3                  | 5        | 5               | 0.048374435 | 0.487189286             | 1.666078024                                 |
| Q13501                                                         | Sequestosome-1                                                                                                                                                              | SQSTM1                                                                             | 1                  | 10       | 10              | 0.021431445 | 0.414601048             | 1.550081846                                 |
| Q16270                                                         | Insulin-like growth factor-binding protein 7                                                                                                                                | IGFBP7                                                                             | 1                  | 6        | 6               | 0.046653372 | 0.478583607             | 1.506124483                                 |
| Q53GL7                                                         | Poly [ADP-ribose] polymerase 10                                                                                                                                             | PARP10                                                                             | 1                  | 17       | 17              | 0.002561383 | 0.208679287             | 3.942489754                                 |
| Q56VL3                                                         | OCIA domain-containing protein 2                                                                                                                                            | OCIAD2                                                                             | 1                  | 3        | 3               | 0.027483579 | 0.451259195             | 0.64755643                                  |
| Q5EBM0                                                         | UMP-CMP kinase 2, mitochondrial                                                                                                                                             | CMPK2                                                                              | 1                  | 18       | 18              | 0.000578982 | 0.134591684             | 48.95897605                                 |
| Q5R314                                                         | Tetratricopeptide repeat protein 38                                                                                                                                         | TTC38                                                                              | 1                  | 4        | 4               | 0.047315123 | 0.481734452             | 1.861750602                                 |
| Q63HN8                                                         | E3 ubiquitin-protein ligase RNF213                                                                                                                                          | RNF213                                                                             | 1                  | 28       | 28              | 0.004791703 | 0.254918607             | 2.461481075                                 |
| Q6P2E9                                                         | Enhancer of mRNA-decapping protein 4                                                                                                                                        | EDC4                                                                               | 1                  | 11       | 11              | 0.028321246 | 0.451259195             | 0.639258804                                 |
| Q709C8                                                         | Vacuolar protein sorting-associated protein 13C                                                                                                                             | VPS13C                                                                             | 1                  | 10       | 10              | 0.006075292 | 0.263841253             | 0.527160356                                 |
| Q86TU7                                                         | Histone-lysine N-methyltransferase setd3                                                                                                                                    | SETD3                                                                              | 1                  | 3        | 3               | 0.008501741 | 0.320488686             | 0.662578579                                 |
| Q86UW9                                                         | Probable E3 ubiquitin-protein ligase DTX2                                                                                                                                   | DTX2                                                                               | 1                  | 3        | 3               | 0.029729897 | 0.451259195             | 0.638491054                                 |



|               |                                              |          |   |    |    |             |             |             |
|---------------|----------------------------------------------|----------|---|----|----|-------------|-------------|-------------|
| Q8IYM9        | E3 ubiquitin-protein ligase TRIM22           | TRIM22   | 1 | 5  | 5  | 0.027460273 | 0.451259195 | 1.58883453  |
| Q92522        | Histone H1x                                  | H1FX     | 1 | 5  | 5  | 0.019324782 | 0.405161292 | 1.855994381 |
| Q96PP9;Q8N8V2 | Guanylate-binding protein 4                  | GBP4     | 2 | 6  | 4  | 0.04256742  | 0.47373118  | 3.09122546  |
| Q99426        | Tubulin-folding cofactor B                   | TBCB     | 1 | 6  | 6  | 0.011792292 | 0.329922649 | 0.578760977 |
| Q99988        | Growth/differentiation factor 15             | GDF15    | 1 | 12 | 12 | 0.016797121 | 0.383543299 | 1.713689828 |
| Q9BQE5        | Apolipoprotein L2                            | APOL2    | 1 | 4  | 4  | 0.000981016 | 0.161942127 | 2.446201569 |
| Q9NRD9        | Dual oxidase 1                               | DUOX1    | 1 | 17 | 12 | 0.009505651 | 0.32107976  | 1.685148555 |
| Q9NUL5        | UPF0515 protein C19orf66                     | C19orf66 | 1 | 4  | 4  | 0.007977496 | 0.30865658  | 3.23880021  |
| Q9NZT2        | Opioid growth factor receptor                | OGFR     | 1 | 10 | 10 | 0.002902712 | 0.212998982 | 1.648340236 |
| Q9P2B2        | Prostaglandin F2 receptor negative regulator | PTGFRN   | 1 | 6  | 6  | 0.013608096 | 0.353146684 | 0.65875054  |
| Q9P2R3        | Rabankyrin-5                                 | ANKFY1   | 1 | 7  | 7  | 0.029797961 | 0.451259195 | 1.544197517 |
| Q9Y6K5        | 2-5-oligoadenylate synthase 3                | OAS3     | 1 | 15 | 15 | 0.033263426 | 0.453747253 | 6.538458042 |

T = 72 h (CoV-2), IFN $\alpha$ 7 / Untreated

| Uniprot ID    | Protein Name                                                                                                                                         | Gene Names  | Number of Proteins | Peptides | Unique Peptides | p-Value     | P <sub>FDR</sub> -Value | Ratio of Means (IFN $\alpha$ 7 / Untreated) |
|---------------|------------------------------------------------------------------------------------------------------------------------------------------------------|-------------|--------------------|----------|-----------------|-------------|-------------------------|---------------------------------------------|
| O00442        | RNA 3-terminal phosphate cyclase                                                                                                                     | RTCA        | 1                  | 8        | 8               | 0.022443609 | 0.542982077             | 0.665727058                                 |
| O14879        | Interferon-induced protein with tetratricopeptide repeats 3                                                                                          | IFIT3       | 1                  | 25       | 25              | 0.023058269 | 0.542982077             | 22.21628095                                 |
| O75976        | Carboxypeptidase D                                                                                                                                   | CPD         | 1                  | 12       | 12              | 0.044558691 | 0.557156448             | 0.440709333                                 |
| P00973        | 2-5-oligoadenylate synthase 1                                                                                                                        | OAS1        | 1                  | 9        | 9               | 0.024420354 | 0.542982077             | 3.392710018                                 |
| P01889        | HLA class I histocompatibility antigen, B-7 alpha chain                                                                                              | HLA-B       | 1                  | 20       | 14              | 0.003118051 | 0.456004853             | 1.959806303                                 |
| P04439        | HLA class I histocompatibility antigen, A-3 alpha chain                                                                                              | HLA-A       | 1                  | 20       | 13              | 0.020852211 | 0.542982077             | 2.069803906                                 |
| P06132        | Uroporphyrinogen decarboxylase                                                                                                                       | UROD        | 1                  | 12       | 12              | 0.001987664 | 0.3566244               | 0.590422048                                 |
| P08195        | 4F2 cell-surface antigen heavy chain                                                                                                                 | SLC3A2      | 1                  | 5        | 5               | 0.012810778 | 0.518590162             | 0.635344774                                 |
| P08571        | Monocyte differentiation antigen CD14;Monocyte differentiation antigen CD14, urinary form;Monocyte differentiation antigen CD14, membrane-bound form | CD14        | 1                  | 7        | 7               | 0.025926764 | 0.542982077             | 0.541013723                                 |
| P09543        | 2,3-cyclic-nucleotide 3-phosphodiesterase                                                                                                            | CNP         | 1                  | 9        | 9               | 0.041140183 | 0.557156448             | 1.576225431                                 |
| P09914;Q5T764 | Interferon-induced protein with tetratricopeptide repeats 1                                                                                          | IFIT1       | 2                  | 25       | 24              | 0.002033013 | 0.3566244               | 40.32729178                                 |
| Q71UI9;P0C055 | Histone H2A.V;Histone H2A.Z                                                                                                                          | H2AFV;H2AFZ | 2                  | 5        | 3               | 0.047388155 | 0.564221141             | 0.544830472                                 |
| P10321        | HLA class I histocompatibility antigen, Cw-7 alpha chain                                                                                             | HLA-C       | 1                  | 16       | 10              | 0.005044577 | 0.482537071             | 1.71330411                                  |
| P19525        | Interferon-induced, double-stranded RNA-activated protein kinase                                                                                     | EIF2AK2     | 1                  | 13       | 13              | 0.049535457 | 0.57608915              | 1.92550923                                  |
| P19971        | Thymidine phosphorylase                                                                                                                              | TYMP        | 1                  | 23       | 23              | 0.004306092 | 0.477069675             | 2.523566614                                 |
| P20591        | Interferon-induced GTP-binding protein Mx1;Interferon-induced GTP-binding protein Mx1, N-terminally processed                                        | MX1         | 1                  | 48       | 45              | 0.001425725 | 0.3566244               | 12.82408058                                 |
| P23497;Q9H930 | Nuclear autoantigen Sp-100                                                                                                                           | SP100       | 2                  | 10       | 10              | 0.015904545 | 0.523110439             | 1.944950358                                 |
| P28838        | Cytosol aminopeptidase                                                                                                                               | LAP3        | 1                  | 32       | 32              | 0.0035137   | 0.456004853             | 1.708728519                                 |
| P31949        | Protein S100-A11;Protein S100-A11, N-terminally processed                                                                                            | S100A11     | 1                  | 2        | 2               | 0.033171365 | 0.557156448             | 1.797374223                                 |
| P42224        | Signal transducer and activator of transcription 1-alpha/beta                                                                                        | STAT1       | 1                  | 35       | 35              | 0.000397629 | 0.279003085             | 3.355776488                                 |
| P42330;P17516 | Aldo-keto reductase family 1 member C3                                                                                                               | AKR1C3      | 2                  | 18       | 10              | 0.010646468 | 0.511729016             | 0.652257494                                 |
| P46776        | 60S ribosomal protein L27a                                                                                                                           | RPL27A      | 1                  | 6        | 6               | 0.019971953 | 0.542982077             | 0.575253297                                 |
| P51970        | NADH dehydrogenase [ubiquinone] 1 alpha subcomplex subunit 8                                                                                         | NDUFA8      | 1                  | 6        | 6               | 0.029079218 | 0.542982077             | 1.702708602                                 |
| P80217        | Interferon-induced 35 kDa protein                                                                                                                    | IFI35       | 1                  | 10       | 10              | 0.007965926 | 0.48293567              | 1.885947152                                 |
| Q13564        | NEDD8-activating enzyme E1 regulatory subunit                                                                                                        | NAE1        | 1                  | 8        | 8               | 0.035192796 | 0.557156448             | 0.629676649                                 |
| Q13751        | Laminin subunit beta-3                                                                                                                               | LAMB3       | 1                  | 20       | 20              | 0.023075529 | 0.542982077             | 1.88431572                                  |
| Q14244        | Ensconsin                                                                                                                                            | MAP7        | 1                  | 8        | 8               | 0.044839125 | 0.557156448             | 0.446941301                                 |
| Q5EBM0        | UMP-CMP kinase 2, mitochondrial                                                                                                                      | CMPK2       | 1                  | 18       | 18              | 0.011557129 | 0.518590162             | 7.22274518                                  |
| Q6ZU80        | Centrosomal protein of 128 kDa                                                                                                                       | CEP128      | 1                  | 7        | 7               | 0.025008651 | 0.542982077             | 1.551110464                                 |
| Q709C8        | Vacuolar protein sorting-associated protein 13C                                                                                                      | VPS13C      | 1                  | 10       | 10              | 0.006805587 | 0.482537071             | 0.572940289                                 |
| Q93052        | Lipoma-preferred partner                                                                                                                             | LPP         | 1                  | 12       | 12              | 0.025572279 | 0.542982077             | 1.5100862                                   |
| Q96FV0        | Leucine-rich repeat-containing protein 46                                                                                                            | LRRC46      | 1                  | 10       | 10              | 0.034142624 | 0.557156448             | 1.86195317                                  |
| Q96PP9;Q8N8V2 | Guanylate-binding protein 4                                                                                                                          | GBP4        | 2                  | 6        | 4               | 0.03621397  | 0.557156448             | 1.54952868                                  |
| Q9H2D6        | TRIO and F-actin-binding protein                                                                                                                     | TRIOBP      | 1                  | 14       | 14              | 0.04448977  | 0.557156448             | 1.638369602                                 |
| Q9NUQ6        | SPATS2-like protein                                                                                                                                  | SPATS2L     | 1                  | 7        | 7               | 0.034899838 | 0.557156448             | 2.07300735                                  |

**T = 72 h (CoV-2), IFN $\alpha$ 16 / Untreated**

| Uniprot ID    | Protein Name                                                                                                  | Gene Names | Number of Proteins | Peptides | Unique Peptides | p-Value     | p <sub>FDR</sub> -Value | Ratio of Means (IFN $\alpha$ 16 / Untreated) |
|---------------|---------------------------------------------------------------------------------------------------------------|------------|--------------------|----------|-----------------|-------------|-------------------------|----------------------------------------------|
| P14927        | Cytochrome b-c1 complex subunit 7                                                                             | UQCRB      | 1                  | 3        | 3               | 0.02934394  | 0.811415117             | 1.793643054                                  |
| P20591        | Interferon-induced GTP-binding protein Mx1;Interferon-induced GTP-binding protein Mx1, N-terminally processed | MX1        | 1                  | 48       | 45              | 0.029345217 | 0.811415117             | 2.311083046                                  |
| P20674        | Cytochrome c oxidase subunit 5A, mitochondrial                                                                | COX5A      | 1                  | 5        | 5               | 0.009735971 | 0.811415117             | 1.851845411                                  |
| P42025        | Beta-centractin                                                                                               | ACTR1B     | 1                  | 13       | 8               | 0.0081513   | 0.811415117             | 1.615411667                                  |
| P50452        | Serpin B8                                                                                                     | SERPINB8   | 1                  | 8        | 5               | 0.00534587  | 0.760895449             | 0.557923858                                  |
| P60660;P14649 | Myosin light polypeptide 6                                                                                    | MYL6       | 2                  | 10       | 10              | 0.008009926 | 0.811415117             | 1.546819146                                  |
| Q03154        | Aminoacylase-1                                                                                                | ACY1       | 1                  | 13       | 13              | 0.028752305 | 0.811415117             | 1.510005125                                  |
| Q15185        | Prostaglandin E synthase 3                                                                                    | PTGES3     | 1                  | 5        | 5               | 0.044217652 | 0.859855344             | 0.565302942                                  |
| Q8NFU3        | Thiosulfate sulfurtransferase/rhodanese-like domain-containing protein                                        | TSTD1      | 1                  | 4        | 4               | 0.001700912 | 0.705097724             | 1.614396852                                  |
| Q99538        | Legumain                                                                                                      | LGMN       | 1                  | 6        | 6               | 0.032148762 | 0.814371479             | 0.592627023                                  |
| Q9NUL5        | UPF0515 protein C19orf66                                                                                      | C19orf66   | 1                  | 4        | 4               | 0.026042375 | 0.811415117             | 1.640652499                                  |

T = 72 h (CoV-2), IFN $\lambda$ 3 / Untreated

| Uniprot ID           | Protein Name                                                                                                  | Gene Names | Number of Proteins | Peptides | Unique Peptides | p-Value     | P <sub>FDR</sub> -Value | Ratio of Means (IFN $\lambda$ 3 / Untreated) |
|----------------------|---------------------------------------------------------------------------------------------------------------|------------|--------------------|----------|-----------------|-------------|-------------------------|----------------------------------------------|
| O00410               | Importin-5                                                                                                    | IPO5       | 1                  | 14       | 13              | 0.001333139 | 0.177724081             | 0.631156478                                  |
| O14545               | TRAF-type zinc finger domain-containing protein 1                                                             | TRAFD1     | 1                  | 7        | 7               | 0.003753399 | 0.268399721             | 1.766544974                                  |
| O14879               | Interferon-induced protein with tetratricopeptide repeats 3                                                   | IFIT3      | 1                  | 25       | 25              | 0.004765196 | 0.286166561             | 66.33182125                                  |
| O14949               | Cytochrome b-c1 complex subunit 8                                                                             | UQCRCQ     | 1                  | 4        | 4               | 0.031993212 | 0.416128485             | 0.639477656                                  |
| O15533               | Tapasin                                                                                                       | TAPBP      | 1                  | 6        | 6               | 0.002301183 | 0.233734409             | 2.350964746                                  |
| O75964               | ATP synthase subunit g, mitochondrial                                                                         | ATPSL      | 1                  | 3        | 3               | 0.030151265 | 0.408504901             | 0.527350572                                  |
| O75976               | Carboxypeptidase D                                                                                            | CPD        | 1                  | 12       | 12              | 0.016671507 | 0.370420035             | 0.664097651                                  |
| P00973               | 2-5-oligoadenylate synthase 1                                                                                 | OAS1       | 1                  | 9        | 9               | 0.029726215 | 0.408504901             | 6.102939967                                  |
| P01889               | HLA class I histocompatibility antigen, B-7 alpha chain                                                       | HLA-B      | 1                  | 20       | 14              | 0.000788971 | 0.126797117             | 2.945686097                                  |
| P04439               | HLA class I histocompatibility antigen, A-3 alpha chain                                                       | HLA-A      | 1                  | 20       | 13              | 0.004573026 | 0.286166561             | 2.74414151                                   |
| P09543               | 2,3-cyclic-nucleotide 3-phosphodiesterase                                                                     | CNP        | 1                  | 9        | 9               | 0.011168667 | 0.335531924             | 2.032743666                                  |
| P09914;Q5T764        | Interferon-induced protein with tetratricopeptide repeats 1                                                   | IFIT1      | 2                  | 25       | 24              | 0.002430838 | 0.235680771             | 121.7540751                                  |
| P10321               | HLA class I histocompatibility antigen, Cw-7 alpha chain                                                      | HLA-C      | 1                  | 16       | 10              | 0.004609711 | 0.286166561             | 2.562732535                                  |
| P10412;Q02539;P22492 | Histone H1.4                                                                                                  | HIST1H1E   | 3                  | 8        | 2               | 0.00693294  | 0.326888592             | 0.573191171                                  |
| P15170               | Eukaryotic peptide chain release factor GTP-binding subunit ERF3A                                             | GSPT1      | 1                  | 8        | 4               | 0.0403098   | 0.446902486             | 0.646700795                                  |
| P19525               | Interferon-induced, double-stranded RNA-activated protein kinase                                              | EIF2AK2    | 1                  | 13       | 13              | 0.004829815 | 0.286166561             | 3.05057632                                   |
| P19971               | Thymidine phosphorylase                                                                                       | TYMP       | 1                  | 23       | 23              | 0.000832236 | 0.126797117             | 4.677156685                                  |
| P20591               | Interferon-induced GTP-binding protein Mx1;Interferon-induced GTP-binding protein Mx1, N-terminally processed | MX1        | 1                  | 48       | 45              | 0.000430761 | 0.121167248             | 26.99318237                                  |
| P21980;O43548        | Protein-glutamine gamma-glutamyltransferase 2                                                                 | TGM2       | 2                  | 31       | 31              | 0.00321105  | 0.268399721             | 1.779006147                                  |
| P23381               | Tryptophan--tRNA ligase, cytoplasmic;T1-TrpRS;T2-TrpRS                                                        | WARS       | 1                  | 28       | 28              | 0.005305135 | 0.298984601             | 3.033754683                                  |
| P28062               | Proteasome subunit beta type-8                                                                                | PSMB8      | 1                  | 14       | 14              | 0.003466958 | 0.268399721             | 1.640758712                                  |
| P28065               | Proteasome subunit beta type-9                                                                                | PSMB9      | 1                  | 10       | 10              | 0.000380534 | 0.121167248             | 2.072520042                                  |
| P28072               | Proteasome subunit beta type-6                                                                                | PSMB6      | 1                  | 7        | 7               | 0.029642595 | 0.408504901             | 0.54716141                                   |
| P28838               | Cytosol aminopeptidase                                                                                        | LAP3       | 1                  | 32       | 32              | 0.00043518  | 0.121167248             | 2.117949432                                  |
| P29590               | Protein PML                                                                                                   | PML        | 1                  | 33       | 33              | 0.000635912 | 0.126797117             | 2.27617433                                   |
| P29966               | Myristoylated alanine-rich C-kinase substrate                                                                 | MARCKS     | 1                  | 3        | 3               | 0.026821221 | 0.403019414             | 1.513989241                                  |
| P41208               | Centrin-2                                                                                                     | CETN2      | 1                  | 7        | 7               | 0.011685043 | 0.3461694               | 2.003334622                                  |
| P41226               | Ubiquitin-like modifier-activating enzyme 7                                                                   | UBA7       | 1                  | 16       | 16              | 0.027908405 | 0.403019414             | 1.555849204                                  |
| P42025               | Beta-centractin                                                                                               | ACTR1B     | 1                  | 13       | 8               | 0.047505753 | 0.45777502              | 1.816497142                                  |
| P42224               | Signal transducer and activator of transcription 1-alpha/beta                                                 | STAT1      | 1                  | 35       | 35              | 0.000116807 | 0.121167248             | 5.838913935                                  |
| P46776               | 60S ribosomal protein L27a                                                                                    | RPL27A     | 1                  | 6        | 6               | 0.045515184 | 0.453307332             | 0.481333429                                  |
| P50336               | Protoporphyrinogen oxidase                                                                                    | PPOX       | 1                  | 17       | 17              | 0.007259629 | 0.326888592             | 0.627614984                                  |
| P50914               | 60S ribosomal protein L14                                                                                     | RPL14      | 1                  | 6        | 6               | 0.042003849 | 0.446902486             | 0.618232463                                  |
| P52789               | Hexokinase-2                                                                                                  | HK2        | 1                  | 10       | 7               | 0.012858117 | 0.360873194             | 1.702751102                                  |
| P53365               | Arfaptin-2                                                                                                    | ARFIP2     | 1                  | 6        | 6               | 0.033113254 | 0.418374313             | 1.504325026                                  |
| P55265               | Double-stranded RNA-specific adenosine deaminase                                                              | ADAR       | 1                  | 19       | 19              | 0.011111341 | 0.335531924             | 1.521303399                                  |
| P61353               | 60S ribosomal protein L27                                                                                     | RPL27      | 1                  | 5        | 5               | 0.02429826  | 0.403019414             | 0.646004933                                  |
| P62081               | 40S ribosomal protein S7                                                                                      | RPS7       | 1                  | 6        | 6               | 0.023489496 | 0.403019414             | 0.563244798                                  |
| P62266               | 40S ribosomal protein S23                                                                                     | RPS23      | 1                  | 3        | 3               | 0.048410272 | 0.458929375             | 0.624228009                                  |
| P62269               | 40S ribosomal protein S18                                                                                     | RPS18      | 1                  | 16       | 16              | 0.012207906 | 0.348665401             | 0.501292753                                  |
| P62304               | Small nuclear ribonucleoprotein E                                                                             | SNRPE      | 1                  | 4        | 4               | 0.040292414 | 0.446902486             | 0.569222481                                  |
| P62805               | Histone H4                                                                                                    | HIST1H4A   | 1                  | 13       | 13              | 0.031123453 | 0.414914535             | 0.528904214                                  |
| P62899               | 60S ribosomal protein L31                                                                                     | RPL31      | 1                  | 6        | 6               | 0.033872374 | 0.422513295             | 0.607839207                                  |

|        |                                                         |          |   |    |    |             |             |             |
|--------|---------------------------------------------------------|----------|---|----|----|-------------|-------------|-------------|
| P62910 | 60S ribosomal protein L32                               | RPL32    | 1 | 6  | 6  | 0.00947205  | 0.335531924 | 0.352056823 |
| P80217 | Interferon-induced 35 kDa protein                       | IFI35    | 1 | 10 | 10 | 0.001908651 | 0.221922487 | 2.562452473 |
| Q08380 | Galectin-3-binding protein                              | LGALS3BP | 1 | 25 | 25 | 0.00055999  | 0.126797117 | 1.508351675 |
| Q12907 | Vesicular integral-membrane protein VIP36               | LMAN2    | 1 | 8  | 8  | 0.029714801 | 0.408504901 | 0.656213156 |
| Q53GL7 | Poly [ADP-ribose] polymerase 10                         | PARP10   | 1 | 17 | 17 | 0.007855263 | 0.326888592 | 3.64578244  |
| Q5EBM0 | UMP-CMP kinase 2, mitochondrial                         | CMPK2    | 1 | 18 | 18 | 0.000449581 | 0.121167248 | 42.14286883 |
| Q63HN8 | E3 ubiquitin-protein ligase RNF213                      | RNF213   | 1 | 28 | 28 | 0.01465361  | 0.367139981 | 2.066678035 |
| Q709C8 | Vacuolar protein sorting-associated protein 13C         | VPS13C   | 1 | 10 | 10 | 0.019715843 | 0.385486612 | 0.500852146 |
| Q8IY67 | Ribonucleoprotein PTB-binding 1                         | RAVER1   | 1 | 6  | 6  | 0.01481034  | 0.367139981 | 1.571025697 |
| Q92820 | Gamma-glutamyl hydrolase                                | GGH      | 1 | 8  | 8  | 0.02693994  | 0.403019414 | 0.600970424 |
| Q9BQE5 | Apolipoprotein L2                                       | APOL2    | 1 | 4  | 4  | 0.004026625 | 0.268399721 | 2.610022316 |
| Q9BUP3 | Oxidoreductase HTATIP2                                  | HTATIP2  | 1 | 6  | 6  | 0.022313009 | 0.399946617 | 1.573780658 |
| Q9NTZ6 | RNA-binding protein 12                                  | RBM12    | 1 | 9  | 9  | 0.041197099 | 0.446902486 | 1.541168447 |
| Q9NUL5 | UPF0515 protein C19orf66                                | C19orf66 | 1 | 4  | 4  | 0.008701656 | 0.33494246  | 3.78596436  |
| Q9NUQ6 | SPATS2-like protein                                     | SPATS2L  | 1 | 7  | 7  | 0.019834379 | 0.385486612 | 2.145604594 |
| Q9Y277 | Voltage-dependent anion-selective channel protein 3     | VDAC3    | 1 | 12 | 12 | 0.02644514  | 0.403019414 | 0.667387171 |
| Q9Y3U8 | 60S ribosomal protein L36                               | RPL36    | 1 | 7  | 7  | 0.041224877 | 0.446902486 | 0.604278306 |
| Q9Y4F1 | FERM, RhoGEF and pleckstrin domain-containing protein 1 | FARP1    | 1 | 6  | 6  | 0.044104458 | 0.450968623 | 2.029789541 |
| Q9Y6K5 | 2-5-oligoadenylate synthase 3                           | OAS3     | 1 | 15 | 15 | 0.036763625 | 0.438082752 | 5.392341932 |

T = 72 h (mock) IFN $\alpha$ 5 / Untreated

| Uniprot ID    | Protein Name                                                                                                                                   | Gene Names     | Number of Proteins | Peptides | Unique Peptides | p-Value     | P <sub>FDR</sub> -Value | Ratio of Means (IFN $\alpha$ 5 / Untreated) |
|---------------|------------------------------------------------------------------------------------------------------------------------------------------------|----------------|--------------------|----------|-----------------|-------------|-------------------------|---------------------------------------------|
| O00468        | Aggrin;Aggrin N-terminal 110 kDa subunit;Aggrin C-terminal 110 kDa subunit;Aggrin C-terminal 90 kDa fragment;Aggrin C-terminal 22 kDa fragment | AGRN           | 1                  | 34       | 34              | 0.0029584   | 0.24160194              | 1.514028072                                 |
| O14545        | TRAF-type zinc finger domain-containing protein 1                                                                                              | TRAFD1         | 1                  | 7        | 7               | 0.011016903 | 0.373099156             | 1.649960951                                 |
| O14879        | Interferon-induced protein with tetratricopeptide repeats 3                                                                                    | IFIT3          | 1                  | 25       | 25              | 0.001137239 | 0.14832759              | 94.98826837                                 |
| O14929        | Histone acetyltransferase type B catalytic subunit                                                                                             | HAT1           | 1                  | 4        | 4               | 0.048857382 | 0.469805802             | 0.529713792                                 |
| O14933        | Ubiquitin/ISG15-conjugating enzyme E2 L6                                                                                                       | UBE2L6         | 1                  | 6        | 6               | 0.028295828 | 0.402624958             | 4.24173436                                  |
| O15533        | Tapasin                                                                                                                                        | TAPBP          | 1                  | 6        | 6               | 0.019584805 | 0.399231048             | 3.254425911                                 |
| O95361;Q309B1 | Tripartite motif-containing protein 16;Tripartite motif-containing protein 16                                                                  | TRIM16;TRIM16L | 2                  | 5        | 5               | 0.013402838 | 0.373099156             | 0.642035941                                 |
| P00751        | Complement factor B;Complement factor B Ba fragment;Complement factor                                                                          | CFB            | 1                  | 40       | 40              | 0.033051011 | 0.417504022             | 1.610129574                                 |
| P01009        | Alpha-1-antitrypsin;Short peptide from AAT                                                                                                     | SERPINA1       | 1                  | 3        | 3               | 0.020106274 | 0.399231048             | 0.591002118                                 |
| P01889        | HLA class I histocompatibility antigen, B-7 alpha chain                                                                                        | HLA-B          | 1                  | 20       | 14              | 0.003380794 | 0.25621587              | 3.712940575                                 |
| P01903;P01906 | HLA class II histocompatibility antigen, DR alpha chain                                                                                        | HLA-DRA        | 2                  | 8        | 8               | 0.005384354 | 0.294228008             | 1.962549487                                 |
| P04439        | HLA class I histocompatibility antigen, A-3 alpha chain                                                                                        | HLA-A          | 1                  | 20       | 13              | 0.032136828 | 0.415819206             | 2.578384906                                 |
| P05161        | Ubiquitin-like protein ISG15                                                                                                                   | ISG15          | 1                  | 8        | 8               | 0.000168719 | 0.067512497             | 150.1045229                                 |
| P09543        | 2,3-cyclic-nucleotide 3-phosphodiesterase                                                                                                      | CNP            | 1                  | 9        | 9               | 0.013538471 | 0.373099156             | 2.099137886                                 |
| P13928;Q5VT79 | Annexin A8;Annexin A8-like protein 2                                                                                                           | ANXA8;ANXA8L2  | 2                  | 14       | 14              | 0.028853248 | 0.402624958             | 0.628449187                                 |
| P15374        | Ubiquitin carboxyl-terminal hydrolase isozyme L3                                                                                               | UCHL3          | 1                  | 7        | 7               | 0.035994594 | 0.424613984             | 2.420964435                                 |
| P18510        | Interleukin-1 receptor antagonist protein                                                                                                      | IL1RN          | 1                  | 5        | 5               | 0.023076716 | 0.402624958             | 1.945917834                                 |
| P19525        | Interferon-induced, double-stranded RNA-activated protein kinase                                                                               | EIF2AK2        | 1                  | 13       | 13              | 0.014065463 | 0.374319408             | 3.130219025                                 |
| P19971        | Thymidine phosphorylase                                                                                                                        | TYMP           | 1                  | 23       | 23              | 0.001188298 | 0.14832759              | 4.798128007                                 |
| P20290        | Transcription factor BTF3                                                                                                                      | BTF3           | 1                  | 5        | 5               | 0.026427685 | 0.402624958             | 0.601866257                                 |
| P20591        | Interferon-induced GTP-binding protein Mx1;Interferon-induced GTP-binding protein Mx1, N-terminally processed                                  | MX1            | 1                  | 48       | 45              | 0.000107477 | 0.067512497             | 34.79396037                                 |
| P21926        | CD9 antigen                                                                                                                                    | CD9            | 1                  | 4        | 4               | 0.010859529 | 0.373099156             | 0.522442165                                 |
| P21980;O43548 | Protein-glutamine gamma-glutamyltransferase 2                                                                                                  | TGM2           | 2                  | 31       | 31              | 0.008012986 | 0.361777794             | 1.762293622                                 |
| P23381        | Tryptophan--tRNA ligase, cytoplasmic;T1-TrpRS;T2-TrpRS                                                                                         | WARS           | 1                  | 28       | 28              | 0.004165832 | 0.267875641             | 3.590316076                                 |
| P23497;Q9H930 | Nuclear autoantigen Sp-100                                                                                                                     | SP100          | 2                  | 10       | 10              | 0.01191578  | 0.373099156             | 3.41043107                                  |
| P28065        | Proteasome subunit beta type-9                                                                                                                 | PSMB9          | 1                  | 10       | 10              | 0.003734742 | 0.264170755             | 1.790827266                                 |
| P28838        | Cytosol aminopeptidase                                                                                                                         | LAP3           | 1                  | 32       | 32              | 0.000300331 | 0.067512497             | 2.370355916                                 |
| P29466;Q5EG05 | Caspase-1;Caspase-1 subunit p20;Caspase-1 subunit p10                                                                                          | CASP1          | 2                  | 11       | 11              | 0.000136916 | 0.067512497             | 1.518221704                                 |
| P29590        | Protein PML                                                                                                                                    | PML            | 1                  | 33       | 33              | 0.000350658 | 0.067512497             | 2.304786949                                 |
| P29728        | 2-5-oligoadenylate synthase 2                                                                                                                  | OAS2           | 1                  | 11       | 11              | 0.000510349 | 0.077354383             | 11.73869233                                 |
| P41226        | Ubiquitin-like modifier-activating enzyme 7                                                                                                    | UBA7           | 1                  | 16       | 16              | 0.035029771 | 0.424613984             | 1.766693504                                 |
| P42224        | Signal transducer and activator of transcription 1-alpha/beta                                                                                  | STAT1          | 1                  | 35       | 35              | 0.000320769 | 0.067512497             | 6.773181717                                 |
| P55210        | Caspase-7;Caspase-7 subunit p20;Caspase-7 subunit p11                                                                                          | CASP7          | 1                  | 11       | 11              | 0.007694071 | 0.35749574              | 1.536928085                                 |
| P55265        | Double-stranded RNA-specific adenosine deaminase                                                                                               | ADAR           | 1                  | 19       | 19              | 0.01233365  | 0.373099156             | 1.618786851                                 |
| P61221        | ATP-binding cassette sub-family E member 1                                                                                                     | ABCE1          | 1                  | 3        | 3               | 0.00230223  | 0.226388443             | 0.669070197                                 |
| P61769        | Beta-2-microglobulin;Beta-2-microglobulin form pl 5.3                                                                                          | B2M            | 1                  | 5        | 5               | 0.012039825 | 0.373099156             | 7.343941062                                 |
| P62304        | Small nuclear ribonucleoprotein E                                                                                                              | SNRPE          | 1                  | 4        | 4               | 0.037486982 | 0.427674062             | 0.558013041                                 |
| P62888        | 60S ribosomal protein L30                                                                                                                      | RPL30          | 1                  | 4        | 4               | 0.016666795 | 0.391704397             | 0.618016745                                 |
| P63208        | S-phase kinase-associated protein 1                                                                                                            | SKP1           | 1                  | 7        | 7               | 0.030058781 | 0.402624958             | 1.965306808                                 |
| P80217        | Interferon-induced 35 kDa protein                                                                                                              | IFI35          | 1                  | 10       | 10              | 0.000293898 | 0.067512497             | 2.024309699                                 |
| P80303        | Nucleobindin-2;Nesfatin-1                                                                                                                      | NUCB2          | 1                  | 9        | 9               | 0.012980883 | 0.373099156             | 2.445874953                                 |
| P80723        | Brain acid soluble protein 1                                                                                                                   | BASP1          | 1                  | 9        | 9               | 0.000476206 | 0.077354383             | 2.29909654                                  |
| P98179        | RNA-binding protein 3                                                                                                                          | RBM3           | 1                  | 6        | 6               | 0.020936374 | 0.399231048             | 0.654543966                                 |
| Q01628;C9JQL5 | Interferon-induced transmembrane protein 3                                                                                                     | IFITM3         | 2                  | 4        | 2               | 0.016368467 | 0.390268393             | 3.399937342                                 |
| Q06323        | Proteasome activator complex subunit 1                                                                                                         | PSME1          | 1                  | 20       | 20              | 0.027799744 | 0.402624958             | 1.939490106                                 |

|               |                                                                      |          |   |    |    |             |             |             |
|---------------|----------------------------------------------------------------------|----------|---|----|----|-------------|-------------|-------------|
| Q07021        | Complement component 1 Q subcomponent-binding protein, mitochondrial | C1QBP    | 1 | 5  | 5  | 0.03605625  | 0.424613984 | 1.561643543 |
| Q08380        | Galectin-3-binding protein                                           | LGALS3BP | 1 | 25 | 25 | 0.016797879 | 0.391704397 | 1.538156916 |
| Q13501        | Sequestosome-1                                                       | SQSTM1   | 1 | 10 | 10 | 0.012979625 | 0.373099156 | 1.539844143 |
| Q14258        | E3 ubiquitin/ISG15 ligase TRIM25                                     | TRIM25   | 1 | 12 | 12 | 0.031295462 | 0.408593049 | 1.944859119 |
| Q53GL7        | Poly [ADP-ribose] polymerase 10                                      | PARP10   | 1 | 17 | 17 | 0.000381786 | 0.067512497 | 4.291931252 |
| Q63HN8        | E3 ubiquitin-protein ligase RNF213                                   | RNF213   | 1 | 28 | 28 | 0.012327371 | 0.373099156 | 2.264909377 |
| Q8N142        | Adenylosuccinate synthetase isozyme 1                                | ADSSL1   | 1 | 13 | 11 | 0.021324813 | 0.399231048 | 0.638814251 |
| Q8NCM8        | Cytoplasmic dynein 2 heavy chain 1                                   | DYNC2H1  | 1 | 40 | 40 | 0.004041879 | 0.267875641 | 0.614245806 |
| Q8WXW3        | Progesterone-induced-blocking factor 1                               | PIBF1    | 1 | 7  | 7  | 0.005407584 | 0.294228008 | 1.887868159 |
| Q96PP9;Q8N8V2 | Guanylate-binding protein 4                                          | GBP4     | 2 | 6  | 4  | 0.013878116 | 0.374319408 | 3.368361714 |
| Q9BQE5        | Apolipoprotein L2                                                    | APOL2    | 1 | 4  | 4  | 0.014548205 | 0.374319408 | 2.623198141 |
| Q9BSJ8        | Extended synaptotagmin-1                                             | ESYT1    | 1 | 13 | 13 | 0.0423694   | 0.454080135 | 0.572471367 |
| Q9BXJ9        | N-alpha-acetyltransferase 15, NatA auxiliary subunit                 | NAA15    | 1 | 6  | 5  | 0.024059543 | 0.402624958 | 0.663148835 |
| Q9GZN4        | Brain-specific serine protease 4                                     | PRSS22   | 1 | 5  | 5  | 0.037400006 | 0.427674062 | 1.631047308 |
| Q9NUL5        | UPF0515 protein C19orf66                                             | C19orf66 | 1 | 4  | 4  | 0.009041755 | 0.373099156 | 3.359611417 |
| Q9Y3U8        | 60S ribosomal protein L36                                            | RPL36    | 1 | 7  | 7  | 0.033046387 | 0.417504022 | 0.661807843 |

T = 72 h (mock) IFN $\alpha$ 7 / Untreated

| Uniprot ID           | Protein Name                                                                                                  | Gene Names         | Number of Proteins | Peptides | Unique Peptides | p-Value     | p <sub>FDR</sub> -Value | Ratio of Means (IFN $\alpha$ 7 / Untreated) |
|----------------------|---------------------------------------------------------------------------------------------------------------|--------------------|--------------------|----------|-----------------|-------------|-------------------------|---------------------------------------------|
| O14879               | Interferon-induced protein with tetratricopeptide repeats 3                                                   | IFIT3              | 1                  | 25       | 25              | 0.006212869 | 0.34318543              | 30.55864395                                 |
| P19105;O14950;P24844 | Myosin regulatory light chain 12A;Myosin regulatory light chain 12B;Myosin regulatory light polypeptide 9     | MYL12A;MYL12B;MYL9 | 3                  | 9        | 9               | 0.028335172 | 0.459015154             | 2.733906722                                 |
| P00167               | Cytochrome b5                                                                                                 | CYB5A              | 1                  | 5        | 5               | 0.005115131 | 0.339356985             | 1.746762864                                 |
| P01040               | Cystatin-A;Cystatin-A, N-terminally processed                                                                 | CSTA               | 1                  | 4        | 4               | 0.029107059 | 0.459015154             | 3.354490039                                 |
| P01889               | HLA class I histocompatibility antigen, B-7 alpha chain                                                       | HLA-B              | 1                  | 20       | 14              | 0.008577211 | 0.37665208              | 2.659376449                                 |
| P02792               | Ferritin light chain                                                                                          | FTL                | 1                  | 9        | 9               | 0.02838246  | 0.459015154             | 1.883436989                                 |
| P05161               | Ubiquitin-like protein ISG15                                                                                  | ISG15              | 1                  | 8        | 8               | 0.001726317 | 0.218236597             | 26.86775196                                 |
| P06753               | Tropomyosin alpha-3 chain                                                                                     | TPM3               | 1                  | 18       | 9               | 0.039467533 | 0.499634955             | 1.566619905                                 |
| P09669               | Cytochrome c oxidase subunit 6C                                                                               | COX6C              | 1                  | 5        | 5               | 0.010268519 | 0.37665208              | 0.570913833                                 |
| P10321               | HLA class I histocompatibility antigen, Cw-7 alpha chain                                                      | HLA-C              | 1                  | 16       | 10              | 0.003506342 | 0.275702388             | 1.988640605                                 |
| P13284               | Gamma-interferon-inducible lysosomal thiol reductase                                                          | IFI30              | 1                  | 2        | 2               | 0.042887245 | 0.509047425             | 1.908110713                                 |
| P18510               | Interleukin-1 receptor antagonist protein                                                                     | IL1RN              | 1                  | 5        | 5               | 0.014521789 | 0.405654698             | 1.754121056                                 |
| P19525               | Interferon-induced, double-stranded RNA-activated protein kinase                                              | EIF2AK2            | 1                  | 13       | 13              | 0.018818799 | 0.450519213             | 2.595273281                                 |
| P19971               | Thymidine phosphorylase                                                                                       | TYMP               | 1                  | 23       | 23              | 0.007274303 | 0.34318543              | 2.745510007                                 |
| P20290               | Transcription factor BTF3                                                                                     | BTF3               | 1                  | 5        | 5               | 0.018608508 | 0.450519213             | 0.602768531                                 |
| P20591               | Interferon-induced GTP-binding protein Mx1;Interferon-induced GTP-binding protein Mx1, N-terminally processed | MX1                | 1                  | 48       | 45              | 7.93148E-05 | 0.084192678             | 14.50347907                                 |
| P28838               | Cytosol aminopeptidase                                                                                        | LAP3               | 1                  | 32       | 32              | 0.001683146 | 0.218236597             | 1.640370581                                 |
| P29590               | Protein PML                                                                                                   | PML                | 1                  | 33       | 33              | 0.001831936 | 0.218236597             | 1.650774645                                 |
| P29728               | 2-5-oligoadenylate synthase 2                                                                                 | OAS2               | 1                  | 11       | 11              | 0.041323552 | 0.50419483              | 4.172354637                                 |
| P31946               | 14-3-3 protein beta/alpha;14-3-3 protein beta/alpha, N-terminally                                             | YWHAH              | 1                  | 20       | 12              | 0.032462313 | 0.460480149             | 0.609828055                                 |
| P42224               | Signal transducer and activator of transcription 1-alpha/beta                                                 | STAT1              | 1                  | 35       | 35              | 0.001504222 | 0.218236597             | 3.912337027                                 |
| P51970               | NADH dehydrogenase [ubiquinone] 1 alpha subcomplex subunit 8                                                  | NDUFA8             | 1                  | 6        | 6               | 0.043203332 | 0.509047425             | 2.133607727                                 |
| P56715               | Oxygen-regulated protein 1                                                                                    | RP1                | 1                  | 7        | 7               | 0.022220522 | 0.45425557              | 1.620715219                                 |
| P60660;P14649        | Myosin light polypeptide 6                                                                                    | MYL6               | 2                  | 10       | 10              | 0.027157971 | 0.459015154             | 1.606500007                                 |
| P61221               | ATP-binding cassette sub-family E member 1                                                                    | ABCE1              | 1                  | 3        | 3               | 0.011302956 | 0.376688624             | 0.661877177                                 |
| P62888               | 60S ribosomal protein L30                                                                                     | RPL30              | 1                  | 4        | 4               | 0.035571529 | 0.473561144             | 0.632494997                                 |
| P80217               | Interferon-induced 35 kDa protein                                                                             | IFI35              | 1                  | 10       | 10              | 0.012065392 | 0.376688624             | 1.616822015                                 |
| P80303               | Nucleobindin-2;Nesfatin-1                                                                                     | NUCB2              | 1                  | 9        | 9               | 0.039537764 | 0.499634955             | 4.221224617                                 |
| Q06323               | Proteasome activator complex subunit 1                                                                        | PSME1              | 1                  | 20       | 20              | 0.001391249 | 0.218236597             | 1.839533568                                 |
| Q53GL7               | Poly [ADP-ribose] polymerase 10                                                                               | PARP10             | 1                  | 17       | 17              | 0.047059876 | 0.520354778             | 1.74564149                                  |
| Q8IU85;Q14012        | Calcium/calmodulin-dependent protein kinase type 1D                                                           | CAMK1D             | 2                  | 5        | 5               | 0.026598844 | 0.459015154             | 1.548813565                                 |
| Q8IYT3               | Coiled-coil domain-containing protein 170                                                                     | CCDC170            | 1                  | 10       | 10              | 0.029473017 | 0.459015154             | 1.819387734                                 |
| Q96NG3               | Tetratricopeptide repeat protein 25                                                                           | TTC25              | 1                  | 6        | 6               | 0.020922743 | 0.45425557              | 1.55460126                                  |
| Q96PP9;Q8N8V2        | Guanylate-binding protein 4                                                                                   | GBP4               | 2                  | 6        | 4               | 0.018422317 | 0.450519213             | 1.649079963                                 |
| Q9BPU9               | B9 domain-containing protein 2                                                                                | B9D2               | 1                  | 4        | 4               | 0.042352325 | 0.509047425             | 0.570672801                                 |
| Q9H2W6               | 39S ribosomal protein L46, mitochondrial                                                                      | MRPL46             | 1                  | 2        | 2               | 0.044290427 | 0.513817354             | 1.550292713                                 |
| Q9NUL5               | UPF0515 protein C19orf66                                                                                      | C19orf66           | 1                  | 4        | 4               | 0.001126517 | 0.217417709             | 1.738533016                                 |
| Q9NUU7;Q9UMR2        | ATP-dependent RNA helicase DDX19A;ATP-dependent RNA helicase                                                  | DDX19A;DDX19       | 2                  | 8        | 8               | 0.047724276 | 0.521768328             | 1.688931401                                 |
| Q9NVR5               | Protein kintoun                                                                                               | DNAAF2             | 1                  | 12       | 12              | 0.016947544 | 0.442441381             | 1.576432607                                 |



**T = 72 h (mock) IFN $\alpha$ 16 / Untreated**

| Uniprot ID | Protein Name                                                                                                  | Gene Names | Number of Proteins | Peptides | Unique Peptides | p-Value     | p <sub>FDR</sub> -Value | Ratio of Means (IFN $\alpha$ 16 / Untreated) |
|------------|---------------------------------------------------------------------------------------------------------------|------------|--------------------|----------|-----------------|-------------|-------------------------|----------------------------------------------|
| O14645     | Axonemal dynein light intermediate polypeptide 1                                                              | DNALI1     | 1                  | 5        | 5               | 0.002955559 | 0.407291732             | 1.535389837                                  |
| O14879     | Interferon-induced protein with tetratricopeptide repeats 3                                                   | IFIT3      | 1                  | 25       | 25              | 0.034459827 | 0.485911567             | 3.339856978                                  |
| O43837     | Isocitrate dehydrogenase [NAD] subunit beta, mitochondrial                                                    | IDH3B      | 1                  | 6        | 6               | 0.041844965 | 0.485911567             | 1.51321778                                   |
| P20042     | Eukaryotic translation initiation factor 2 subunit 2                                                          | EIF2S2     | 1                  | 6        | 6               | 0.032602284 | 0.485911567             | 1.725862508                                  |
| P20591     | Interferon-induced GTP-binding protein Mx1;Interferon-induced GTP-binding protein Mx1, N-terminally processed | MX1        | 1                  | 48       | 45              | 0.009471639 | 0.481372252             | 2.117747589                                  |
| P56715     | Oxygen-regulated protein 1                                                                                    | RP1        | 1                  | 7        | 7               | 0.037800264 | 0.485911567             | 1.642714861                                  |
| P62861     | 40S ribosomal protein S30                                                                                     | FAU        | 1                  | 3        | 3               | 0.048417978 | 0.485911567             | 0.606939128                                  |
| Q02978     | Mitochondrial 2-oxoglutarate/malate carrier protein                                                           | SLC25A11   | 1                  | 10       | 10              | 0.041333329 | 0.485911567             | 1.524163567                                  |
| Q13418     | Integrin-linked protein kinase                                                                                | ILK        | 1                  | 8        | 8               | 0.041612861 | 0.485911567             | 1.529839062                                  |
| Q58FF8     | Putative heat shock protein HSP 90-beta 2                                                                     | HSP90AB2P  | 1                  | 9        | 2               | 0.001957913 | 0.407291732             | 0.592146333                                  |
| Q76M96     | Coiled-coil domain-containing protein 80                                                                      | CCDC80     | 1                  | 5        | 5               | 0.004447545 | 0.407291732             | 0.603834897                                  |
| Q8NE86     | Calcium uniporter protein, mitochondrial                                                                      | MCU        | 1                  | 6        | 6               | 0.037745109 | 0.485911567             | 0.656257874                                  |
| Q8WWI5     | Choline transporter-like protein 1                                                                            | SLC44A1    | 1                  | 5        | 5               | 0.020859409 | 0.485911567             | 0.648451825                                  |
| Q8WXW3     | Progesterone-induced-blocking factor 1                                                                        | PIBF1      | 1                  | 7        | 7               | 0.049419286 | 0.485911567             | 2.899737656                                  |
| Q92688     | Acidic leucine-rich nuclear phosphoprotein 32 family member B                                                 | ANP32B     | 1                  | 6        | 3               | 0.046594338 | 0.485911567             | 0.577465361                                  |
| Q9H7Z7     | Prostaglandin E synthase 2;Prostaglandin E synthase 2 truncated form                                          | PTGES2     | 1                  | 6        | 6               | 0.031905541 | 0.485911567             | 0.620081626                                  |
| Q9UHQ9     | NADH-cytochrome b5 reductase 1                                                                                | CYB5R1     | 1                  | 8        | 8               | 0.045412639 | 0.485911567             | 0.650789107                                  |
| Q9UIF3     | Tektin-2                                                                                                      | TEKT2      | 1                  | 12       | 12              | 0.024939549 | 0.485911567             | 1.521361507                                  |
| Q9Y224     | UPF0568 protein C14orf166                                                                                     | C14orf166  | 1                  | 9        | 9               | 0.026152117 | 0.485911567             | 0.660655287                                  |

T = 72 h (mock) IFN $\lambda$ 3 / Untreated

| Uniprot ID    | Protein Name                                                                                                                          | Gene Names | Number of Proteins | Peptides | Unique Peptides | p-Value     | P <sub>FDR</sub> -Value | Ratio of Means (IFN $\lambda$ 3 / Untreated) |
|---------------|---------------------------------------------------------------------------------------------------------------------------------------|------------|--------------------|----------|-----------------|-------------|-------------------------|----------------------------------------------|
| O00468        | Agriin;Agriin N-terminal 110 kDa subunit;Agriin C-terminal 110 kDa subunit;Agriin C-terminal 90 kDa fragment;Agriin C-terminal 22 kDa | AGRN       | 1                  | 34       | 34              | 0.012652915 | 0.374315396             | 1.509708646                                  |
| O14879        | Interferon-induced protein with tetratricopeptide repeats 3                                                                           | IFIT3      | 1                  | 25       | 25              | 0.007056448 | 0.34309969              | 54.11247446                                  |
| O14929        | Histone acetyltransferase type B catalytic subunit                                                                                    | HAT1       | 1                  | 4        | 4               | 0.016637707 | 0.398183321             | 0.663021058                                  |
| O14933        | Ubiquitin/ISG15-conjugating enzyme E2 L6                                                                                              | UBE2L6     | 1                  | 6        | 6               | 0.011625243 | 0.353739542             | 3.129789383                                  |
| O15533        | Tapasin                                                                                                                               | TAPBP      | 1                  | 6        | 6               | 0.009262127 | 0.353739542             | 2.484583764                                  |
| O95433        | Activator of 90 kDa heat shock protein ATPase homolog 1                                                                               | AHSA1      | 1                  | 9        | 9               | 0.02699992  | 0.418657986             | 1.526092652                                  |
| P01889        | HLA class I histocompatibility antigen, B-7 alpha chain                                                                               | HLA-B      | 1                  | 20       | 14              | 0.002266075 | 0.209858279             | 3.893287128                                  |
| P04439        | HLA class I histocompatibility antigen, A-3 alpha chain                                                                               | HLA-A      | 1                  | 20       | 13              | 0.022556962 | 0.418657986             | 2.625944466                                  |
| P05109        | Protein S100-A8;Protein S100-A8, N-terminally processed                                                                               | S100A8     | 1                  | 8        | 8               | 0.021450428 | 0.418023822             | 0.642770609                                  |
| P05161        | Ubiquitin-like protein ISG15                                                                                                          | ISG15      | 1                  | 8        | 8               | 0.000911702 | 0.15509589              | 109.6748655                                  |
| P08590;P05976 | Myosin light chain 3;Myosin light chain 1/3, skeletal muscle isoform                                                                  | MYL3;MYL1  | 2                  | 2        | 2               | 0.005694641 | 0.319206533             | 1.530683234                                  |
| P13473        | Lysosome-associated membrane glycoprotein 2                                                                                           | LAMP2      | 1                  | 5        | 5               | 0.038632964 | 0.424752924             | 1.649221141                                  |
| P15328        | Folate receptor alpha                                                                                                                 | FOLR1      | 1                  | 7        | 7               | 0.027466813 | 0.418657986             | 2.174605222                                  |
| P17900        | Ganglioside GM2 activator;Ganglioside GM2 activator isoform short                                                                     | GM2A       | 1                  | 3        | 3               | 0.023148482 | 0.418657986             | 1.504113886                                  |
| P18510        | Interleukin-1 receptor antagonist protein                                                                                             | IL1RN      | 1                  | 5        | 5               | 0.009517084 | 0.353739542             | 1.894183621                                  |
| P19525        | Interferon-induced, double-stranded RNA-activated protein kinase                                                                      | EIF2AK2    | 1                  | 13       | 13              | 0.011572849 | 0.353739542             | 3.09337808                                   |
| P19971        | Thymidine phosphorylase                                                                                                               | TYMP       | 1                  | 23       | 23              | 0.004023007 | 0.273776161             | 4.574044666                                  |
| P20042        | Eukaryotic translation initiation factor 2 subunit 2                                                                                  | EIF2S2     | 1                  | 6        | 6               | 0.045863016 | 0.446091173             | 1.830273723                                  |
| P20591        | Interferon-induced GTP-binding protein Mx1;Interferon-induced GTP-binding protein Mx1, N-terminally processed                         | MX1        | 1                  | 48       | 45              | 0.000390342 | 0.153729497             | 28.69350368                                  |
| P21926        | CD9 antigen                                                                                                                           | CD9        | 1                  | 4        | 4               | 0.014201304 | 0.384451623             | 0.530199842                                  |
| P21980;O43548 | Protein-glutamine gamma-glutamyltransferase 2                                                                                         | TGM2       | 2                  | 31       | 31              | 0.011134114 | 0.353739542             | 1.8524377                                    |
| P23381        | Tryptophan--tRNA ligase, cytoplasmic;T1-TrpRS;T2-TrpRS                                                                                | WARS       | 1                  | 28       | 28              | 0.003924113 | 0.273776161             | 2.59065283                                   |
| P23497;Q9H930 | Nuclear autoantigen Sp-100                                                                                                            | SP100      | 2                  | 10       | 10              | 0.013092881 | 0.379919316             | 2.640400308                                  |
| P28065        | Proteasome subunit beta type-9                                                                                                        | PSMB9      | 1                  | 10       | 10              | 0.000172154 | 0.142914                | 1.707761882                                  |
| P28072        | Proteasome subunit beta type-6                                                                                                        | PSMB6      | 1                  | 7        | 7               | 0.010144366 | 0.353739542             | 0.635263515                                  |
| P28838        | Cytosol aminopeptidase                                                                                                                | LAP3       | 1                  | 32       | 32              | 0.001648569 | 0.191242366             | 2.130355149                                  |
| P29590        | Protein PML                                                                                                                           | PML        | 1                  | 33       | 33              | 0.000505214 | 0.153729497             | 2.066053803                                  |
| P29728        | 2-5-oligoadenylate synthase 2                                                                                                         | OAS2       | 1                  | 11       | 11              | 0.001414438 | 0.191242366             | 11.17966877                                  |
| P41226        | Ubiquitin-like modifier-activating enzyme 7                                                                                           | UBA7       | 1                  | 16       | 16              | 0.007248585 | 0.34309969              | 1.552859569                                  |
| P42224        | Signal transducer and activator of transcription 1-alpha/beta                                                                         | STAT1      | 1                  | 35       | 35              | 0.000141431 | 0.142914                | 6.100260474                                  |
| P48449        | Lanosterol synthase                                                                                                                   | LSS        | 1                  | 6        | 6               | 0.034205145 | 0.42330866              | 0.65795201                                   |
| P61221        | ATP-binding cassette sub-family E member 1                                                                                            | ABCE1      | 1                  | 3        | 3               | 0.004718172 | 0.279158537             | 0.66563832                                   |
| P62304        | Small nuclear ribonucleoprotein E                                                                                                     | SNRPE      | 1                  | 4        | 4               | 0.033458027 | 0.42330866              | 0.561909406                                  |
| P80217        | Interferon-induced 35 kDa protein                                                                                                     | IFI35      | 1                  | 10       | 10              | 0.008553997 | 0.353739542             | 2.233171118                                  |
| Q01628;C9JQL5 | Interferon-induced transmembrane protein 3                                                                                            | IFITM3     | 2                  | 4        | 2               | 0.046284577 | 0.446091173             | 1.627209665                                  |
| Q06323        | Proteasome activator complex subunit 1                                                                                                | PSME1      | 1                  | 20       | 20              | 0.042163124 | 0.436280293             | 1.950282169                                  |
| Q13835        | Plakophilin-1                                                                                                                         | PKP1       | 1                  | 11       | 11              | 0.043129891 | 0.437460323             | 0.486357855                                  |
| Q14258        | E3 ubiquitin/ISG15 ligase TRIM25                                                                                                      | TRIM25     | 1                  | 12       | 12              | 0.016396497 | 0.398183321             | 1.512841908                                  |
| Q53GL7        | Poly [ADP-ribose] polymerase 10                                                                                                       | PARP10     | 1                  | 17       | 17              | 0.027003635 | 0.418657986             | 3.428850031                                  |
| Q63HN8        | E3 ubiquitin-protein ligase RNF213                                                                                                    | RNF213     | 1                  | 28       | 28              | 0.006962252 | 0.34309969              | 2.016794316                                  |
| Q709C8        | Vacuolar protein sorting-associated protein 13C                                                                                       | VPS13C     | 1                  | 10       | 10              | 0.035061739 | 0.42330866              | 0.571119183                                  |
| Q96FV0        | Leucine-rich repeat-containing protein 46                                                                                             | LRRC46     | 1                  | 10       | 10              | 0.019211055 | 0.405144041             | 0.616940375                                  |
| Q96PP9;Q8N8V2 | Guanylate-binding protein 4                                                                                                           | GBP4       | 2                  | 6        | 4               | 0.021508197 | 0.418023822             | 2.261329541                                  |

|        |                                                |       |   |    |    |             |             |             |
|--------|------------------------------------------------|-------|---|----|----|-------------|-------------|-------------|
| Q9BQE5 | Apolipoprotein L2                              | APOL2 | 1 | 4  | 4  | 0.000946595 | 0.15509589  | 2.553647181 |
| Q9NRX4 | 14 kDa phosphohistidine phosphatase            | PHPT1 | 1 | 4  | 4  | 0.012502374 | 0.374315396 | 0.610964135 |
| Q9P258 | Protein RCC2                                   | RCC2  | 1 | 21 | 21 | 0.008773323 | 0.353739542 | 0.665604626 |
| Q9UBQ7 | Glyoxylate reductase/hydroxypyruvate reductase | GRHPR | 1 | 10 | 10 | 0.004651892 | 0.279158537 | 0.655753211 |
| Q9Y3U8 | 60S ribosomal protein L36                      | RPL36 | 1 | 7  | 7  | 0.036002204 | 0.424752924 | 0.636614651 |

T = 72 h, Untreated: CoV-2 / mock

| Uniprot ID                                     | Protein Name                                                                                                                                                                                                | Gene Names | Number of Proteins | Peptides | Unique Peptides | p-Value     | p <sub>FDR</sub> -Value | Ratio of Means (Untreated: CoV-2 / mock) |
|------------------------------------------------|-------------------------------------------------------------------------------------------------------------------------------------------------------------------------------------------------------------|------------|--------------------|----------|-----------------|-------------|-------------------------|------------------------------------------|
| O00115                                         | Deoxyribonuclease-2-alpha                                                                                                                                                                                   | DNASE2     | 1                  | 5        | 5               | 1.21552E-05 | 0.025878526             | 0.639459183                              |
| O00391                                         | Sulfhydryl oxidase 1                                                                                                                                                                                        | QSOX1      | 1                  | 17       | 17              | 0.000745799 | 0.132805329             | 0.218535338                              |
| O00468                                         | Aggrin;Aggrin N-terminal 110 kDa subunit;Aggrin C-terminal 110 kDa subunit;Aggrin C-terminal 90 kDa fragment;Aggrin C-terminal 22                                                                           | AGRN       | 1                  | 34       | 34              | 0.032178843 | 0.337481561             | 0.487312691                              |
| O00560                                         | Syntenin-1                                                                                                                                                                                                  | SDCBP      | 1                  | 8        | 8               | 0.042225878 | 0.358084664             | 0.514196138                              |
| O14976                                         | Cyclin-G-associated kinase                                                                                                                                                                                  | GAK        | 1                  | 6        | 6               | 0.018924005 | 0.29039315              | 1.811366737                              |
| O43490                                         | Prominin-1                                                                                                                                                                                                  | PROM1      | 1                  | 27       | 27              | 0.00126288  | 0.143131287             | 0.129958059                              |
| O43653                                         | Prostate stem cell antigen                                                                                                                                                                                  | PSCA       | 1                  | 4        | 4               | 0.0441009   | 0.358084664             | 0.230569553                              |
| O43920                                         | NADH dehydrogenase [ubiquinone] iron-sulfur protein 5                                                                                                                                                       | NDUFSS     | 1                  | 5        | 5               | 0.02186853  | 0.302933694             | 1.699742177                              |
| O60635                                         | Tetraspanin-1                                                                                                                                                                                               | TSPAN1     | 1                  | 3        | 3               | 0.00022668  | 0.132805329             | 0.321445585                              |
| O75915                                         | PRA1 family protein 3                                                                                                                                                                                       | ARL6IP5    | 1                  | 3        | 3               | 0.008616345 | 0.229302483             | 1.850588844                              |
| O95436                                         | Sodium-dependent phosphate transport protein 2B                                                                                                                                                             | SLC34A2    | 1                  | 12       | 12              | 0.014870196 | 0.280165026             | 0.446893802                              |
| P00450;CON__ENS<br>EMBL:ENSBTAP000<br>00031900 | Ceruloplasmin                                                                                                                                                                                               | CP         | 2                  | 31       | 31              | 0.005267688 | 0.190083185             | 0.360068258                              |
| P00751                                         | Complement factor B;Complement factor B Ba                                                                                                                                                                  | CFB        | 1                  | 40       | 40              | 0.002030715 | 0.147211642             | 0.241071833                              |
| P01024;CON__Q2U<br>VX4                         | Complement C3;Complement C3 beta chain;C3-beta-c;Complement C3 alpha chain;C3a anaphylatoxin;Acylation stimulating protein;Complement C3b alpha chain;Complement C3c alpha chain fragment 1;Complement C3dg | C3         | 2                  | 100      | 100             | 0.002582414 | 0.148593491             | 0.202003045                              |
| P01033                                         | Metalloproteinase inhibitor 1                                                                                                                                                                               | TIMP1      | 1                  | 7        | 7               | 0.003902972 | 0.172375303             | 0.371612233                              |
| P01034                                         | Cystatin-C                                                                                                                                                                                                  | CST3       | 1                  | 4        | 4               | 0.008036183 | 0.220784206             | 0.235054301                              |
| P01833                                         | Polymeric immunoglobulin receptor;Secretory component                                                                                                                                                       | PIGR       | 1                  | 42       | 42              | 0.002118885 | 0.147211642             | 0.185626117                              |
| P03973                                         | Antileukoproteinase                                                                                                                                                                                         | SLPI       | 1                  | 5        | 5               | 0.008932177 | 0.231909821             | 0.219711683                              |
| P04844                                         | Dolichyl-diphosphooligosaccharide--protein glycosyltransferase                                                                                                                                              | RPN2       | 1                  | 8        | 8               | 0.002989257 | 0.163182781             | 1.793000905                              |
| P07919;A0A096LP5<br>5                          | Cytochrome b-c1 complex subunit 6, mitochondrial                                                                                                                                                            | UQCRH      | 2                  | 5        | 5               | 0.025327477 | 0.302933694             | 2.754802722                              |
| P08195                                         | 4F2 cell-surface antigen heavy chain                                                                                                                                                                        | SLC3A2     | 1                  | 5        | 5               | 0.020546748 | 0.292436854             | 1.634079964                              |
| P08571                                         | Monocyte differentiation antigen CD14;Monocyte differentiation antigen CD14, urinary form;Monocyte differentiation antigen                                                                                  | CD14       | 1                  | 7        | 7               | 0.013774375 | 0.264640176             | 0.305238448                              |
| P09668                                         | Pro-cathepsin H;Cathepsin H mini chain;Cathepsin H;Cathepsin H                                                                                                                                              | CTSH       | 1                  | 11       | 11              | 0.001652287 | 0.147211642             | 0.648788216                              |
| P12273                                         | Prolactin-inducible protein                                                                                                                                                                                 | PIP        | 1                  | 6        | 6               | 0.015903561 | 0.282748161             | 0.327424214                              |
| P13987                                         | CD59 glycoprotein                                                                                                                                                                                           | CD59       | 1                  | 4        | 4               | 0.036599335 | 0.339620278             | 0.482693024                              |
| P14780                                         | Matrix metalloproteinase-9;67 kDa matrix metalloproteinase-                                                                                                                                                 | MMP9       | 1                  | 13       | 13              | 0.024564876 | 0.302933694             | 0.28164335                               |
| P15941                                         | Mucin-1;Mucin-1 subunit alpha;Mucin-1 subunit beta                                                                                                                                                          | MUC1       | 1                  | 9        | 9               | 0.0021482   | 0.147211642             | 0.304914696                              |
| P20042                                         | Eukaryotic translation initiation factor 2 subunit 2                                                                                                                                                        | EIF2S2     | 1                  | 6        | 6               | 0.046437959 | 0.359380406             | 1.749709984                              |
| P20061                                         | Transcobalamin-1                                                                                                                                                                                            | TCN1       | 1                  | 8        | 8               | 0.041948828 | 0.358084664             | 0.514675452                              |
| P25685;Q9UDY4                                  | DnaJ homolog subfamily B member 1                                                                                                                                                                           | DNAJB1     | 2                  | 13       | 13              | 0.010595555 | 0.242558463             | 1.540868516                              |
| P27105                                         | Erythrocyte band 7 integral membrane protein                                                                                                                                                                | STOM       | 1                  | 15       | 15              | 0.024936472 | 0.302933694             | 0.544895515                              |
| P27701                                         | CD82 antigen                                                                                                                                                                                                | CD82       | 1                  | 4        | 4               | 0.032841172 | 0.337714828             | 0.488273223                              |
| P31949                                         | Protein S100-A11;Protein S100-A11, N-terminally processed                                                                                                                                                   | S100A11    | 1                  | 2        | 2               | 0.036700746 | 0.339620278             | 0.607715561                              |
| P43353;P48448                                  | Aldehyde dehydrogenase family 3 member B1                                                                                                                                                                   | ALDH3B1    | 2                  | 15       | 14              | 0.023166916 | 0.302933694             | 0.526189677                              |
| P49788                                         | Retinoic acid receptor responder protein 1                                                                                                                                                                  | RARRES1    | 1                  | 8        | 8               | 0.048456862 | 0.363255844             | 0.574980624                              |
| P54707                                         | Potassium-transporting ATPase alpha chain 2                                                                                                                                                                 | ATP12A     | 1                  | 31       | 27              | 0.006565002 | 0.206992477             | 0.577939665                              |

|                                           |                                                                                                                                          |          |   |    |    |             |             |             |
|-------------------------------------------|------------------------------------------------------------------------------------------------------------------------------------------|----------|---|----|----|-------------|-------------|-------------|
| P54727                                    | UV excision repair protein RAD23 homolog B                                                                                               | RAD23B   | 1 | 7  | 7  | 0.043640081 | 0.358084664 | 1.713821319 |
| P55058                                    | Phospholipid transfer protein                                                                                                            | PLTP     | 1 | 11 | 11 | 0.02018703  | 0.29039315  | 0.425869883 |
| P60903                                    | Protein S100-A10                                                                                                                         | S100A10  | 1 | 5  | 5  | 0.035729566 | 0.339135786 | 0.552206392 |
| P61916                                    | Epididymal secretory protein E1                                                                                                          | NPC2     | 1 | 2  | 2  | 0.005171072 | 0.189814    | 0.632088248 |
| P63092;Q5JWF2;P38405;P19087;A8MTJ3;P11488 | Guanine nucleotide-binding protein G(s) subunit alpha isoforms short;Guanine nucleotide-binding protein G(s) subunit alpha isoforms XLas | GNAS     | 6 | 9  | 8  | 0.015864924 | 0.282748161 | 0.586014583 |
| P80188                                    | Neutrophil gelatinase-associated lipocalin                                                                                               | LCN2     | 1 | 16 | 16 | 0.000538344 | 0.132805329 | 0.326826597 |
| Q03169                                    | Tumor necrosis factor alpha-induced protein 2                                                                                            | TNFAIP2  | 1 | 15 | 15 | 0.0037648   | 0.172375303 | 1.776038258 |
| Q07666                                    | KH domain-containing, RNA-binding, signal transduction-                                                                                  | KHDRBS1  | 1 | 11 | 11 | 0.044234977 | 0.358084664 | 1.589647974 |
| Q08380                                    | Galectin-3-binding protein                                                                                                               | LGALS3BP | 1 | 25 | 25 | 0.00235469  | 0.147211642 | 0.467354093 |
| Q08431                                    | Lactadherin;Lactadherin short form;Medin                                                                                                 | MFGE8    | 1 | 5  | 5  | 0.005132616 | 0.189814    | 0.624489326 |
| Q12805                                    | EGF-containing fibulin-like extracellular matrix protein 1                                                                               | EFEMP1   | 1 | 14 | 14 | 0.019265442 | 0.29039315  | 0.131075047 |
| Q13724                                    | Mannosyl-oligosaccharide glucosidase                                                                                                     | MOGS     | 1 | 12 | 12 | 0.039607582 | 0.348450785 | 1.603024649 |
| Q13751                                    | Laminin subunit beta-3                                                                                                                   | LAMB3    | 1 | 20 | 20 | 0.018285564 | 0.29039315  | 0.395197968 |
| Q16270                                    | Insulin-like growth factor-binding protein 7                                                                                             | IGFBP7   | 1 | 6  | 6  | 0.004644226 | 0.183102895 | 0.166752721 |
| Q16348                                    | Solute carrier family 15 member 2                                                                                                        | SLC15A2  | 1 | 4  | 4  | 0.038518017 | 0.348450785 | 0.508412617 |
| Q16787                                    | Laminin subunit alpha-3                                                                                                                  | LAMA3    | 1 | 8  | 8  | 0.039917267 | 0.349727827 | 0.51421513  |
| Q53GD3                                    | Choline transporter-like protein 4                                                                                                       | SLC44A4  | 1 | 5  | 5  | 0.007860996 | 0.220784206 | 0.25077206  |
| Q6NVY1                                    | 3-hydroxyisobutyryl-CoA hydrolase, mitochondrial                                                                                         | HIBCH    | 1 | 6  | 6  | 0.022032558 | 0.302933694 | 0.615791531 |
| Q6UXY8                                    | Transmembrane channel-like protein 5                                                                                                     | TMC5     | 1 | 19 | 19 | 0.002184324 | 0.147211642 | 0.299694792 |
| Q7Z404                                    | Transmembrane channel-like protein 4                                                                                                     | TMC4     | 1 | 16 | 16 | 0.001435693 | 0.147211642 | 0.211189174 |
| Q8IWA5                                    | Choline transporter-like protein 2                                                                                                       | SLC44A2  | 1 | 5  | 5  | 0.006125582 | 0.200636385 | 0.592188274 |
| Q8NFJ5                                    | Retinoic acid-induced protein 3                                                                                                          | GPRC5A   | 1 | 5  | 5  | 0.028005598 | 0.31772678  | 0.343282107 |
| Q8TDL5                                    | BPI fold-containing family B member 1                                                                                                    | BPIFB1   | 1 | 30 | 30 | 0.006034713 | 0.200636385 | 0.203135623 |
| Q8WXI7                                    | Mucin-16                                                                                                                                 | MUC16    | 1 | 39 | 39 | 0.001806616 | 0.147211642 | 0.069632828 |
| Q99102                                    | Mucin-4;Mucin-4 alpha chain;Mucin-4 beta chain                                                                                           | MUC4     | 1 | 37 | 37 | 0.00424091  | 0.18057795  | 0.251637985 |
| Q99828                                    | Calcium and integrin-binding protein 1                                                                                                   | CIB1     | 1 | 10 | 10 | 0.016801031 | 0.282748161 | 0.452608989 |
| Q9BW30                                    | Tubulin polymerization-promoting protein family member 3                                                                                 | TPPP3    | 1 | 13 | 13 | 0.002420107 | 0.147211642 | 0.638953157 |
| Q9H223                                    | EH domain-containing protein 4                                                                                                           | EHD4     | 1 | 21 | 17 | 0.027599497 | 0.317497664 | 0.665099286 |
| Q9NP55                                    | BPI fold-containing family A member 1                                                                                                    | BPIFA1   | 1 | 11 | 11 | 0.002211361 | 0.147211642 | 0.275526535 |
| Q9NQ84                                    | G-protein coupled receptor family C group 5 member C                                                                                     | GPRC5C   | 1 | 5  | 5  | 0.010342026 | 0.241957948 | 0.253627269 |
| Q9P035                                    | Very-long-chain (3R)-3-hydroxyacyl-CoA dehydratase 3                                                                                     | HACD3    | 1 | 7  | 7  | 0.024848697 | 0.302933694 | 1.928953096 |
| Q9UGM3                                    | Deleted in malignant brain tumors 1 protein                                                                                              | DMBT1    | 1 | 14 | 14 | 0.001802563 | 0.147211642 | 0.336818366 |
| Q9UMX0                                    | Ubiquilin-1                                                                                                                              | UBQLN1   | 1 | 10 | 5  | 0.01178661  | 0.253471652 | 1.51299425  |
| Q9Y376                                    | Calcium-binding protein 39                                                                                                               | CAB39    | 1 | 8  | 7  | 0.04613586  | 0.359380406 | 0.458012712 |

T = 72 h, IFN $\alpha$ 5: CoV-2 / mock

| Uniprot ID                                    | Protein Name                                                                                                                                                                                                | Gene Names | Number of Proteins | Peptides | Unique Peptides | p-Value     | p <sub>FDR</sub> -Value | Ratio of Means (IFN $\alpha$ 5: CoV-2 / mock) |
|-----------------------------------------------|-------------------------------------------------------------------------------------------------------------------------------------------------------------------------------------------------------------|------------|--------------------|----------|-----------------|-------------|-------------------------|-----------------------------------------------|
| K7EJ46                                        | Small integral membrane protein 22                                                                                                                                                                          | SMIM22     | 1                  | 2        | 2               | 0.002740305 | 0.288025456             | 0.313748798                                   |
| O00391                                        | Sulfhydryl oxidase 1                                                                                                                                                                                        | QSOX1      | 1                  | 17       | 17              | 0.003106764 | 0.288025456             | 0.285362167                                   |
| O00468                                        | Agrin;Agrin N-terminal 110 kDa subunit;Agrin C-terminal 110 kDa subunit;Agrin C-terminal 90 kDa fragment;Agrin C-terminal                                                                                   | AGRN       | 1                  | 34       | 34              | 0.012509333 | 0.330619128             | 0.49953356                                    |
| O00515                                        | Ladinin-1                                                                                                                                                                                                   | LAD1       | 1                  | 13       | 13              | 0.006604967 | 0.317105083             | 1.772154136                                   |
| O14976                                        | Cyclin-G-associated kinase                                                                                                                                                                                  | GAK        | 1                  | 6        | 6               | 0.016189725 | 0.330619128             | 0.487838312                                   |
| O15020                                        | Spectrin beta chain, non-erythrocytic 2                                                                                                                                                                     | SPTBN2     | 1                  | 27       | 22              | 0.029470343 | 0.395690981             | 1.855365315                                   |
| O15160                                        | DNA-directed RNA polymerases I and III subunit RPAC1                                                                                                                                                        | POLR1C     | 1                  | 5        | 5               | 0.003000672 | 0.288025456             | 1.547469605                                   |
| O43490                                        | Prominin-1                                                                                                                                                                                                  | PROM1      | 1                  | 27       | 27              | 0.029120434 | 0.395690981             | 0.08098288                                    |
| O60635                                        | Tetraspanin-1                                                                                                                                                                                               | TSPAN1     | 1                  | 3        | 3               | 0.031832399 | 0.411672988             | 0.290533431                                   |
| O95436                                        | Sodium-dependent phosphate transport protein 2B                                                                                                                                                             | SLC34A2    | 1                  | 12       | 12              | 0.048698953 | 0.435226874             | 0.4226145                                     |
| P00450;CON_ENS<br>EMBL:ENSBTAP000<br>00031900 | Ceruloplasmin                                                                                                                                                                                               | CP         | 2                  | 31       | 31              | 0.009649749 | 0.330619128             | 0.299197042                                   |
| P00751                                        | Complement factor B;Complement factor B Ba                                                                                                                                                                  | CFB        | 1                  | 40       | 40              | 0.000609792 | 0.257088415             | 0.204153325                                   |
| P01024;CON_Q2U<br>VX4                         | Complement C3;Complement C3 beta chain;C3-beta-c;Complement C3 alpha chain;C3a anaphylatoxin;Acylation stimulating protein;Complement C3b alpha chain;Complement C3c alpha chain fragment 1;Complement C3dg | C3         | 2                  | 100      | 100             | 0.001639101 | 0.287935406             | 0.22096803                                    |
| P01034                                        | Cystatin-C                                                                                                                                                                                                  | CST3       | 1                  | 4        | 4               | 0.015234586 | 0.330619128             | 0.283507231                                   |
| P01833                                        | Polymeric immunoglobulin receptor;Secretory component                                                                                                                                                       | PIGR       | 1                  | 42       | 42              | 0.007669066 | 0.330619128             | 0.171836143                                   |
| P01903;P01906                                 | HLA class II histocompatibility antigen, DR alpha chain                                                                                                                                                     | HLA-DRA    | 2                  | 8        | 8               | 0.033173992 | 0.412427077             | 0.491683859                                   |
| P03973                                        | Antileukoproteinase                                                                                                                                                                                         | SLPI       | 1                  | 5        | 5               | 0.000832742 | 0.287935406             | 0.188560468                                   |
| P06396;REV_Q6T                                | Gelsolin                                                                                                                                                                                                    | GSN        | 2                  | 42       | 20              | 0.004070283 | 0.288025456             | 0.638374388                                   |
| P07339                                        | Cathepsin D;Cathepsin D light chain;Cathepsin D heavy chain                                                                                                                                                 | CTSD       | 1                  | 23       | 23              | 0.045170335 | 0.428914715             | 0.600004208                                   |
| P07947;P06241                                 | Tyrosine-protein kinase Yes                                                                                                                                                                                 | YES1       | 2                  | 7        | 3               | 9.57765E-05 | 0.201896958             | 0.568069253                                   |
| P08195                                        | 4F2 cell-surface antigen heavy chain                                                                                                                                                                        | SLC3A2     | 1                  | 5        | 5               | 0.003841787 | 0.288025456             | 1.938323986                                   |
| P08571                                        | Monocyte differentiation antigen CD14;Monocyte differentiation antigen CD14, urinary form;Monocyte                                                                                                          | CD14       | 1                  | 7        | 7               | 0.005234699 | 0.299513101             | 0.328448273                                   |
| P08603;Q03591;Q0<br>2985                      | Complement factor H                                                                                                                                                                                         | CFH        | 3                  | 23       | 23              | 0.046552893 | 0.43230616              | 0.244679603                                   |
| P09668                                        | Pro-cathepsin H;Cathepsin H mini chain;Cathepsin H;Cathepsin                                                                                                                                                | CTSH       | 1                  | 11       | 11              | 0.018279034 | 0.340992948             | 0.52960497                                    |
| P10909                                        | Clusterin;Clusterin beta chain;Clusterin alpha chain                                                                                                                                                        | CLU        | 1                  | 22       | 22              | 0.008921609 | 0.330619128             | 0.536591915                                   |
| P14780                                        | Matrix metalloproteinase-9;67 kDa matrix metalloproteinase-                                                                                                                                                 | MMP9       | 1                  | 13       | 13              | 0.039496354 | 0.412427077             | 0.249655237                                   |
| P15907                                        | Beta-galactoside alpha-2,6-sialyltransferase 1                                                                                                                                                              | ST6GAL1    | 1                  | 4        | 4               | 0.009507056 | 0.330619128             | 0.400605866                                   |
| P15941                                        | Mucin-1;Mucin-1 subunit alpha;Mucin-1 subunit beta                                                                                                                                                          | MUC1       | 1                  | 9        | 9               | 0.000506554 | 0.257088415             | 0.293298754                                   |
| P18077                                        | 60S ribosomal protein L35a                                                                                                                                                                                  | RPL35A     | 1                  | 5        | 5               | 0.023157284 | 0.369786587             | 1.693101745                                   |
| P18827                                        | Syndecan-1                                                                                                                                                                                                  | SDC1       | 1                  | 3        | 3               | 0.038695331 | 0.412427077             | 1.72351264                                    |
| P24821                                        | Tenascin                                                                                                                                                                                                    | TNC        | 1                  | 47       | 47              | 0.041759111 | 0.412427077             | 0.657422988                                   |
| P25774                                        | Cathepsin S                                                                                                                                                                                                 | CTSS       | 1                  | 14       | 14              | 0.009369469 | 0.330619128             | 0.617425931                                   |

|                      |                                                             |          |   |    |    |             |             |             |
|----------------------|-------------------------------------------------------------|----------|---|----|----|-------------|-------------|-------------|
| P27105               | Erythrocyte band 7 integral membrane protein                | STOM     | 1 | 15 | 15 | 0.028173236 | 0.393305833 | 0.47112012  |
| P35637               | RNA-binding protein FUS                                     | FUS      | 1 | 8  | 6  | 0.032414703 | 0.412427077 | 0.648651198 |
| P42704               | Leucine-rich PPR motif-containing protein, mitochondrial    | LRPPRC   | 1 | 19 | 19 | 0.001932763 | 0.288025456 | 1.50755873  |
| P43353;P48448        | Aldehyde dehydrogenase family 3 member B1                   | ALDH3B1  | 2 | 15 | 14 | 0.029682634 | 0.396018937 | 0.536039802 |
| P46060               | Ran GTPase-activating protein 1                             | RANGAP1  | 1 | 13 | 13 | 0.029412188 | 0.395690981 | 1.525787958 |
| P49788               | Retinoic acid receptor responder protein 1                  | RARRS1   | 1 | 8  | 8  | 0.019159964 | 0.347218672 | 0.586359088 |
| P53365               | Arfaptin-2                                                  | ARFIP2   | 1 | 6  | 6  | 0.016600491 | 0.330619128 | 0.662182816 |
| P54707               | Potassium-transporting ATPase alpha chain 2                 | ATP12A   | 1 | 31 | 27 | 0.019780647 | 0.353369527 | 0.429528194 |
| P55789               | FAD-linked sulfhydryl oxidase ALR                           | GFER     | 1 | 4  | 4  | 0.034126477 | 0.412427077 | 1.691181794 |
| P80188               | Neutrophil gelatinase-associated lipocalin                  | LCN2     | 1 | 16 | 16 | 0.019177146 | 0.347218672 | 0.344891056 |
| P80303               | Nucleobindin-2;Nesfatin-1                                   | NUCB2    | 1 | 9  | 9  | 0.003062405 | 0.288025456 | 0.226652242 |
| P98175               | RNA-binding protein 10                                      | RBM10    | 1 | 5  | 5  | 0.01173493  | 0.330619128 | 1.532042693 |
| Q03169               | Tumor necrosis factor alpha-induced protein 2               | TNFAIP2  | 1 | 15 | 15 | 0.002560438 | 0.288025456 | 2.061186873 |
| Q08380               | Galectin-3-binding protein                                  | LGALS3BP | 1 | 25 | 25 | 0.000481962 | 0.257088415 | 0.507610953 |
| Q08AF3;Q7Z7L1;Q68D06 | Schlafen family member 5                                    | SLFN5    | 3 | 5  | 5  | 0.034884193 | 0.412427077 | 1.665004103 |
| Q12805               | EGF-containing fibulin-like extracellular matrix protein 1  | EFEMP1   | 1 | 14 | 14 | 0.004099034 | 0.288025456 | 0.155713191 |
| Q15833               | Syntaxin-binding protein 2                                  | STXBP2   | 1 | 18 | 18 | 0.020709411 | 0.35783147  | 0.66101332  |
| Q16270               | Insulin-like growth factor-binding protein 7                | IGFBP7   | 1 | 6  | 6  | 0.007351815 | 0.330619128 | 0.238777144 |
| Q53GD3               | Choline transporter-like protein 4                          | SLC44A4  | 1 | 5  | 5  | 0.023589373 | 0.369786587 | 0.27608049  |
| Q56VL3               | OCIA domain-containing protein 2                            | OCIAD2   | 1 | 3  | 3  | 0.046829842 | 0.432970642 | 0.62038494  |
| Q6NVY1               | 3-hydroxyisobutyryl-CoA hydrolase, mitochondrial            | HIBCH    | 1 | 6  | 6  | 0.040082045 | 0.412427077 | 0.652110209 |
| Q6UN15               | Pre-mRNA 3-end-processing factor FIP1                       | FIP1L1   | 1 | 8  | 8  | 0.041854003 | 0.412427077 | 1.655961011 |
| Q6UXY8               | Transmembrane channel-like protein 5                        | TMC5     | 1 | 19 | 19 | 0.00361148  | 0.288025456 | 0.296974978 |
| Q6ZNW5               | GDP-D-glucose phosphorylase 1                               | GDPGP1   | 1 | 8  | 8  | 0.009231319 | 0.330619128 | 1.529930546 |
| Q7Z404               | Transmembrane channel-like protein 4                        | TMC4     | 1 | 16 | 16 | 0.023612737 | 0.369786587 | 0.216349934 |
| Q7Z4L5               | Tetratricopeptide repeat protein 21B                        | TTC21B   | 1 | 4  | 4  | 0.01256979  | 0.330619128 | 1.522324087 |
| Q8IXT5               | RNA-binding protein 12B                                     | RBM12B   | 1 | 7  | 7  | 0.011441265 | 0.330619128 | 1.512561907 |
| Q8N1D5               | Uncharacterized protein C1orf158                            | C1orf158 | 1 | 5  | 5  | 0.022817704 | 0.369786587 | 0.535646423 |
| Q8TDL5               | BPI fold-containing family B member 1                       | BPIFB1   | 1 | 30 | 30 | 0.010335807 | 0.330619128 | 0.212823814 |
| Q8WXI7               | Mucin-16                                                    | MUC16    | 1 | 39 | 39 | 0.001534542 | 0.287935406 | 0.043738364 |
| Q99102               | Mucin-4;Mucin-4 alpha chain;Mucin-4 beta chain              | MUC4     | 1 | 37 | 37 | 0.004648166 | 0.296919234 | 0.264260464 |
| Q99538               | Legumain                                                    | LGMN     | 1 | 6  | 6  | 0.017845554 | 0.33657013  | 0.613255599 |
| Q99828               | Calcium and integrin-binding protein 1                      | CIB1     | 1 | 10 | 10 | 0.047437664 | 0.434776507 | 0.499098535 |
| Q9BX68               | Histidine triad nucleotide-binding protein 2, mitochondrial | HINT2    | 1 | 3  | 3  | 0.013469002 | 0.330619128 | 0.432764661 |
| Q9H008               | Phospholysine phosphohistidine inorganic pyrophosphate      | LHPP     | 1 | 4  | 4  | 0.045496373 | 0.42903768  | 0.573800815 |
| Q9H977               | WD repeat-containing protein 54                             | WDR54    | 1 | 7  | 7  | 0.024003102 | 0.369786587 | 1.561904496 |
| Q9NP55               | BPI fold-containing family A member 1                       | BPIFA1   | 1 | 11 | 11 | 0.038290118 | 0.412427077 | 0.235493704 |
| Q9NR30               | Nucleolar RNA helicase 2                                    | DDX21    | 1 | 5  | 4  | 0.036721591 | 0.412427077 | 1.557630357 |
| Q9NUQ8               | ATP-binding cassette sub-family F member 3                  | ABCF3    | 1 | 10 | 10 | 0.02304964  | 0.369786587 | 1.652738066 |
| Q9UGM3               | Deleted in malignant brain tumors 1 protein                 | DMBT1    | 1 | 14 | 14 | 0.043468197 | 0.41650436  | 0.279556305 |
| Q9UK41               | Vacuolar protein sorting-associated protein 28 homolog      | VPS28    | 1 | 10 | 10 | 0.005257109 | 0.299513101 | 0.651182972 |
| Q9ULC4               | Malignant T-cell-amplified sequence 1                       | MCTS1    | 1 | 4  | 4  | 0.037626883 | 0.412427077 | 1.587109717 |
| Q9UN37               | Vacuolar protein sorting-associated protein 4A              | VPS4A    | 1 | 7  | 5  | 0.020673904 | 0.35783147  | 1.683005381 |
| Q9Y376               | Calcium-binding protein 39                                  | CAB39    | 1 | 8  | 7  | 0.006015902 | 0.309305406 | 0.414821548 |

|               |                                                                                                                            |       |   |    |   |             |             |             |
|---------------|----------------------------------------------------------------------------------------------------------------------------|-------|---|----|---|-------------|-------------|-------------|
| Q9Y3D6        | Mitochondrial fission 1 protein                                                                                            | FIS1  | 1 | 4  | 4 | 0.025796051 | 0.382944199 | 0.648692464 |
| Q9Y6E0;O00506 | Serine/threonine-protein kinase 24;Serine/threonine-protein kinase 24 36 kDa subunit;Serine/threonine-protein kinase 24 12 | STK24 | 2 | 11 | 6 | 0.030166551 | 0.399943965 | 0.637551109 |



T = 72 h, IFN $\alpha$ 7: CoV-2 / mock

| Uniprot ID                                     | Protein Name                                                                                                                                                                                                                        | Gene Names | Number of Proteins | Peptides | Unique Peptides | p-Value     | p <sub>FDR</sub> -Value | Ratio of Means (IFN $\alpha$ 7: CoV-2 / mock) |
|------------------------------------------------|-------------------------------------------------------------------------------------------------------------------------------------------------------------------------------------------------------------------------------------|------------|--------------------|----------|-----------------|-------------|-------------------------|-----------------------------------------------|
| K7EJ46                                         | Small integral membrane protein 22                                                                                                                                                                                                  | SMIM22     | 1                  | 2        | 2               | 0.013233528 | 0.378280486             | 0.584188577                                   |
| O00391                                         | Sulfhydryl oxidase 1                                                                                                                                                                                                                | QSOX1      | 1                  | 17       | 17              | 0.003156094 | 0.236205432             | 0.220184745                                   |
| O00468                                         | Agirin;Agirin N-terminal 110 kDa subunit;Agirin C-terminal 110 kDa subunit;Agirin C-terminal 90 kDa fragment;Agirin C-terminal 22 kDa                                                                                               | AGRN       | 1                  | 34       | 34              | 0.004010734 | 0.238959236             | 0.530878147                                   |
| O00560                                         | Syntenin-1                                                                                                                                                                                                                          | SDCBP      | 1                  | 8        | 8               | 0.020716204 | 0.450471745             | 0.413778252                                   |
| O43490                                         | Prominin-1                                                                                                                                                                                                                          | PROM1      | 1                  | 27       | 27              | 0.000548348 | 0.192812914             | 0.159392851                                   |
| O43795                                         | Unconventional myosin-Ib                                                                                                                                                                                                            | MYO1B      | 1                  | 22       | 19              | 0.005148847 | 0.261242706             | 0.663516738                                   |
| O60635                                         | Tetraspanin-1                                                                                                                                                                                                                       | TSPAN1     | 1                  | 3        | 3               | 0.008777888 | 0.346401483             | 0.259532191                                   |
| O95436                                         | Sodium-dependent phosphate transport protein 2B                                                                                                                                                                                     | SLC34A2    | 1                  | 12       | 12              | 0.005932053 | 0.287300093             | 0.479756762                                   |
| P00450;CON__EN<br>SEMBL:ENSBTAP0<br>0000031900 | Ceruloplasmin                                                                                                                                                                                                                       | CP         | 2                  | 31       | 31              | 0.002660453 | 0.234975264             | 0.353611139                                   |
| P00751                                         | Complement factor B;Complement factor B Ba fragment;Complement                                                                                                                                                                      | CFB        | 1                  | 40       | 40              | 0.001313498 | 0.222290474             | 0.247291629                                   |
| P01024;CON__Q2<br>UVX4                         | Complement C3;Complement C3 beta chain;C3-beta-c;Complement C3 alpha chain;C3a anaphylatoxin;Acylation stimulating protein;Complement C3b alpha chain;Complement C3c alpha chain fragment 1;Complement C3dg fragment;Complement C3g | C3         | 2                  | 100      | 100             | 0.000274094 | 0.192812914             | 0.210756052                                   |
| P01033                                         | Metalloproteinase inhibitor 1                                                                                                                                                                                                       | TIMP1      | 1                  | 7        | 7               | 0.008498643 | 0.346401483             | 0.370665393                                   |
| P01833                                         | Polymeric immunoglobulin receptor;Secretory component                                                                                                                                                                               | PIGR       | 1                  | 42       | 42              | 0.024106707 | 0.467012652             | 0.263377571                                   |
| P03973                                         | Antileukoproteinase                                                                                                                                                                                                                 | SLPI       | 1                  | 5        | 5               | 0.030877818 | 0.476816161             | 0.16870288                                    |
| P04843                                         | Dolichyl-diphosphooligosaccharide--protein glycosyltransferase                                                                                                                                                                      | RPN1       | 1                  | 18       | 18              | 0.029437554 | 0.470398191             | 1.68167501                                    |
| P06396;REV__Q6<br>TDU7                         | Gelsolin                                                                                                                                                                                                                            | GSN        | 2                  | 42       | 20              | 0.001241682 | 0.222290474             | 0.617990051                                   |
| P06731;P31997;P<br>40198                       | Carcinoembryonic antigen-related cell adhesion molecule 5                                                                                                                                                                           | CEACAM5    | 3                  | 13       | 11              | 0.034461014 | 0.497134445             | 0.548029653                                   |
| P07948;P08631                                  | Tyrosine-protein kinase Lyn                                                                                                                                                                                                         | LYN        | 2                  | 14       | 12              | 0.020238872 | 0.444629244             | 0.653169788                                   |
| P08603;Q03591;<br>Q02985                       | Complement factor H                                                                                                                                                                                                                 | CFH        | 3                  | 23       | 23              | 0.000174155 | 0.185561961             | 0.213588158                                   |
| P10909                                         | Clusterin;Clusterin beta chain;Clusterin alpha chain                                                                                                                                                                                | CLU        | 1                  | 22       | 22              | 0.028724951 | 0.470398191             | 0.557364502                                   |
| P12273                                         | Prolactin-inducible protein                                                                                                                                                                                                         | PIP        | 1                  | 6        | 6               | 0.018255698 | 0.425136407             | 0.297486888                                   |
| P14780                                         | Matrix metalloproteinase-9;67 kDa matrix metalloproteinase-9;82                                                                                                                                                                     | MMP9       | 1                  | 13       | 13              | 0.023755456 | 0.467012652             | 0.270133942                                   |
| P15941                                         | Mucin-1;Mucin-1 subunit alpha;Mucin-1 subunit beta                                                                                                                                                                                  | MUC1       | 1                  | 9        | 9               | 6.50027E-05 | 0.138520753             | 0.310128779                                   |
| P20061                                         | Transcobalamin-1                                                                                                                                                                                                                    | TCN1       | 1                  | 8        | 8               | 0.004148987 | 0.238959236             | 0.378539432                                   |
| P27105                                         | Erythrocyte band 7 integral membrane protein                                                                                                                                                                                        | STOM       | 1                  | 15       | 15              | 0.027835841 | 0.467572955             | 0.546884498                                   |
| P27701                                         | CD82 antigen                                                                                                                                                                                                                        | CD82       | 1                  | 4        | 4               | 0.001577834 | 0.222290474             | 0.411711915                                   |
| P29992                                         | Guanine nucleotide-binding protein subunit alpha-11                                                                                                                                                                                 | GNA11      | 1                  | 10       | 4               | 0.025742083 | 0.467572955             | 0.400964719                                   |
| P35241                                         | Radixin                                                                                                                                                                                                                             | RDX        | 1                  | 21       | 6               | 0.008611535 | 0.346401483             | 0.489248528                                   |
| P43353;P48448                                  | Aldehyde dehydrogenase family 3 member B1                                                                                                                                                                                           | ALDH3B1    | 2                  | 15       | 14              | 0.011869246 | 0.366570492             | 0.59049712                                    |
| P49788                                         | Retinoic acid receptor responder protein 1                                                                                                                                                                                          | RARRES1    | 1                  | 8        | 8               | 0.023325166 | 0.464541393             | 0.534136643                                   |
| P50148                                         | Guanine nucleotide-binding protein G(q) subunit alpha                                                                                                                                                                               | GNAQ       | 1                  | 10       | 5               | 0.047539739 | 0.551336863             | 0.570758944                                   |
| P54707                                         | Potassium-transporting ATPase alpha chain 2                                                                                                                                                                                         | ATP12A     | 1                  | 31       | 27              | 0.002343964 | 0.234975264             | 0.523855102                                   |
| P80188                                         | Neutrophil gelatinase-associated lipocalin                                                                                                                                                                                          | LCN2       | 1                  | 16       | 16              | 0.001379596 | 0.222290474             | 0.313769046                                   |

|        |                                                                  |          |   |    |    |             |             |             |
|--------|------------------------------------------------------------------|----------|---|----|----|-------------|-------------|-------------|
| P98160 | Basement membrane-specific heparan sulfate proteoglycan core     | HSPG2    | 1 | 40 | 40 | 0.032689798 | 0.496884637 | 0.44074221  |
| Q02386 | Zinc finger protein 45                                           | ZNF45    | 1 | 2  | 2  | 0.009716211 | 0.353581747 | 0.261123097 |
| Q03169 | Tumor necrosis factor alpha-induced protein 2                    | TNFAIP2  | 1 | 15 | 15 | 0.011629664 | 0.364453142 | 1.638050764 |
| Q08380 | Galectin-3-binding protein                                       | LGALS3BP | 1 | 25 | 25 | 0.001536404 | 0.222290474 | 0.508017784 |
| Q12805 | EGF-containing fibulin-like extracellular matrix protein 1       | EFEMP1   | 1 | 14 | 14 | 0.003574789 | 0.238959236 | 0.166529381 |
| Q16270 | Insulin-like growth factor-binding protein 7                     | IGFBP7   | 1 | 6  | 6  | 0.004431083 | 0.239246986 | 0.167699053 |
| Q53GD3 | Choline transporter-like protein 4                               | SLC44A4  | 1 | 5  | 5  | 0.007498647 | 0.34344822  | 0.295696649 |
| Q6UXY8 | Transmembrane channel-like protein 5                             | TMC5     | 1 | 19 | 19 | 0.004490793 | 0.239246986 | 0.382145396 |
| Q7Z404 | Transmembrane channel-like protein 4                             | TMC4     | 1 | 16 | 16 | 0.00063336  | 0.192812914 | 0.196775267 |
| Q8TDL5 | BPI fold-containing family B member 1                            | BPIFB1   | 1 | 30 | 30 | 0.004146615 | 0.238959236 | 0.224153742 |
| Q8WXI7 | Mucin-16                                                         | MUC16    | 1 | 39 | 39 | 0.001311534 | 0.222290474 | 0.08219263  |
| Q92522 | Histone H1x                                                      | H1FX     | 1 | 5  | 5  | 0.015838202 | 0.399373336 | 1.633754479 |
| Q99102 | Mucin-4;Mucin-4 alpha chain;Mucin-4 beta chain                   | MUC4     | 1 | 37 | 37 | 0.001506161 | 0.222290474 | 0.29091275  |
| Q99816 | Tumor susceptibility gene 101 protein                            | TSG101   | 1 | 10 | 10 | 0.014466414 | 0.399373336 | 0.637191251 |
| Q9NP55 | BPI fold-containing family A member 1                            | BPIFA1   | 1 | 11 | 11 | 0.003689341 | 0.238959236 | 0.238277118 |
| Q9Y2A9 | N-acetyllactosaminide beta-1,3-N-acetylglucosaminyltransferase 3 | B3GNT3   | 1 | 6  | 6  | 0.04882048  | 0.551336863 | 0.651503596 |
| Q9Y376 | Calcium-binding protein 39                                       | CAB39    | 1 | 8  | 7  | 0.042143996 | 0.532092202 | 0.551416886 |
| Q9Y6R7 | IgGfC-binding protein                                            | FCGBP    | 1 | 34 | 34 | 0.025551026 | 0.467572955 | 0.146573974 |

T = 72 h, IFN $\alpha$ 16: CoV-2 / mock

| Uniprot ID                                    | Protein Name                                                                                                                                                                              | Gene Names | Number of Proteins | Peptides | Unique Peptides | p-Value     | P <sub>FDR</sub> -Value | Ratio of Means (IFN $\alpha$ 16: CoV-2 / mock) |
|-----------------------------------------------|-------------------------------------------------------------------------------------------------------------------------------------------------------------------------------------------|------------|--------------------|----------|-----------------|-------------|-------------------------|------------------------------------------------|
| B0FP48;E5RIL1                                 | Uroplakin-3b-like protein                                                                                                                                                                 | UPK3BL     | 2                  | 5        | 5               | 0.033337394 | 0.389460499             | 0.631772121                                    |
| O00391                                        | Sulfhydryl oxidase 1                                                                                                                                                                      | QSOX1      | 1                  | 17       | 17              | 0.002296359 | 0.162354374             | 0.209702132                                    |
| O00468                                        | Agrin;Agrin N-terminal 110 kDa subunit;Agrin C-terminal 110 kDa subunit;Agrin C-terminal 90 kDa fragment;Agrin                                                                            | AGRN       | 1                  | 34       | 34              | 0.01717762  | 0.335368745             | 0.436733979                                    |
| O00560                                        | Syntenin-1                                                                                                                                                                                | SDCBP      | 1                  | 8        | 8               | 0.034458534 | 0.389460499             | 0.41415854                                     |
| O43286;Q9UBX8                                 | Beta-1,4-galactosyltransferase 5                                                                                                                                                          | B4GALT5    | 2                  | 7        | 7               | 0.042793183 | 0.401258054             | 0.645814963                                    |
| O43490                                        | Prominin-1                                                                                                                                                                                | PROM1      | 1                  | 27       | 27              | 0.006692268 | 0.249884497             | 0.126295658                                    |
| O43653                                        | Prostate stem cell antigen                                                                                                                                                                | PSCA       | 1                  | 4        | 4               | 0.008527582 | 0.262369724             | 0.192342597                                    |
| O60635                                        | Tetraspanin-1                                                                                                                                                                             | TSPAN1     | 1                  | 3        | 3               | 0.01899516  | 0.335368745             | 0.283412222                                    |
| O60936                                        | Nucleolar protein 3                                                                                                                                                                       | NOL3       | 1                  | 5        | 5               | 0.010597543 | 0.288904507             | 2.12840721                                     |
| O95436                                        | Sodium-dependent phosphate transport protein 2B                                                                                                                                           | SLC34A2    | 1                  | 12       | 12              | 0.025981164 | 0.381306818             | 0.484590914                                    |
| P00387                                        | NADH-cytochrome b5 reductase 3;NADH-cytochrome b5 reductase 3 membrane-bound form;NADH-cytochrome                                                                                         | CYB5R3     | 1                  | 9        | 9               | 0.023714714 | 0.361952309             | 1.567607794                                    |
| P00450;CON_E<br>NSEMBL:ENSBTA<br>P00000031900 | Ceruloplasmin                                                                                                                                                                             | CP         | 2                  | 31       | 31              | 0.023186352 | 0.359937405             | 0.325317694                                    |
| P00751                                        | Complement factor B;Complement factor B Ba                                                                                                                                                | CFB        | 1                  | 40       | 40              | 0.000245893 | 0.129807789             | 0.197023795                                    |
| P00918                                        | Carbonic anhydrase 2                                                                                                                                                                      | CA2        | 1                  | 5        | 5               | 0.02777449  | 0.381706815             | 1.508541789                                    |
| P01024;CON_Q<br>2UVX4                         | Complement C3;Complement C3 beta chain;C3-beta-c;Complement C3 alpha chain;C3a anaphylatoxin;Acylation stimulating protein;Complement C3b alpha chain;Complement C3c alpha chain fragment | C3         | 2                  | 100      | 100             | 0.002200698 | 0.162354374             | 0.233942999                                    |
| P01033                                        | Metalloproteinase inhibitor 1                                                                                                                                                             | TIMP1      | 1                  | 7        | 7               | 0.010622249 | 0.288904507             | 0.249356257                                    |
| P01034                                        | Cystatin-C                                                                                                                                                                                | CST3       | 1                  | 4        | 4               | 0.001643659 | 0.156222299             | 0.34130657                                     |
| P01833                                        | Polymeric immunoglobulin receptor;Secretory                                                                                                                                               | PIGR       | 1                  | 42       | 42              | 0.000900054 | 0.156222299             | 0.155584434                                    |
| P03973                                        | Antileukoproteinase                                                                                                                                                                       | SLPI       | 1                  | 5        | 5               | 0.014963481 | 0.309949751             | 0.204699144                                    |
| P07602                                        | Prosaposin;Saposin-A;Saposin-B-Val;Saposin-B;Saposin-                                                                                                                                     | PSAP       | 1                  | 11       | 11              | 0.027210772 | 0.381706815             | 0.436991153                                    |
| P08243                                        | Asparagine synthetase [glutamine-hydrolyzing]                                                                                                                                             | ASNS       | 1                  | 3        | 3               | 0.031571023 | 0.387740113             | 1.911575103                                    |
| P08603;Q03591;<br>Q02985                      | Complement factor H                                                                                                                                                                       | CFH        | 3                  | 23       | 23              | 0.006305837 | 0.249884497             | 0.191430627                                    |
| P09622                                        | Dihydrolipoyl dehydrogenase, mitochondrial                                                                                                                                                | DLD        | 1                  | 12       | 12              | 0.041140445 | 0.39553897              | 0.606955811                                    |
| P09668                                        | Pro-cathepsin H;Cathepsin H mini chain;Cathepsin                                                                                                                                          | CTSH       | 1                  | 11       | 11              | 0.03265253  | 0.389460499             | 0.588823443                                    |
| P13987                                        | CD59 glycoprotein                                                                                                                                                                         | CD59       | 1                  | 4        | 4               | 0.020564549 | 0.341593447             | 0.27689209                                     |
| P15941                                        | Mucin-1;Mucin-1 subunit alpha;Mucin-1 subunit beta                                                                                                                                        | MUC1       | 1                  | 9        | 9               | 0.002331873 | 0.162354374             | 0.330929466                                    |
| P18077                                        | 60S ribosomal protein L35a                                                                                                                                                                | RPL35A     | 1                  | 5        | 5               | 0.041426607 | 0.39553897              | 1.566009197                                    |
| P18827                                        | Syndecan-1                                                                                                                                                                                | SDC1       | 1                  | 3        | 3               | 0.01883918  | 0.335368745             | 1.68454312                                     |
| P20061                                        | Transcobalamin-1                                                                                                                                                                          | TCN1       | 1                  | 8        | 8               | 0.024661818 | 0.368341869             | 0.314363486                                    |
| P20674                                        | Cytochrome c oxidase subunit 5A, mitochondrial                                                                                                                                            | COX5A      | 1                  | 5        | 5               | 0.027055505 | 0.381706815             | 1.705333643                                    |
| P27105                                        | Erythrocyte band 7 integral membrane protein                                                                                                                                              | STOM       | 1                  | 15       | 15              | 0.027290651 | 0.381706815             | 0.458062603                                    |

|                      |                                                                                                            |          |   |    |    |             |             |             |
|----------------------|------------------------------------------------------------------------------------------------------------|----------|---|----|----|-------------|-------------|-------------|
| P27701               | CD82 antigen                                                                                               | CD82     | 1 | 4  | 4  | 0.001373097 | 0.156222299 | 0.318562608 |
| P41212               | Transcription factor ETV6                                                                                  | ETV6     | 1 | 6  | 6  | 8.55466E-05 | 0.089439014 | 1.681342984 |
| P43353;P48448        | Aldehyde dehydrogenase family 3 member B1                                                                  | ALDH3B1  | 2 | 15 | 14 | 0.046732226 | 0.410575989 | 0.525406255 |
| P46976               | Glycogenin-1                                                                                               | GYG1     | 1 | 6  | 6  | 0.005282889 | 0.230135847 | 1.681295864 |
| P51148               | Ras-related protein Rab-5C                                                                                 | RAB5C    | 1 | 7  | 4  | 0.023238426 | 0.359937405 | 0.652369418 |
| P51687               | Sulfite oxidase, mitochondrial                                                                             | SUOX     | 1 | 6  | 6  | 0.028066497 | 0.381706815 | 1.560984272 |
| P51857               | 3-oxo-5-beta-steroid 4-dehydrogenase                                                                       | AKR1D1   | 1 | 2  | 2  | 0.038405647 | 0.395431978 | 1.71777836  |
| P52943               | Cysteine-rich protein 2                                                                                    | CRIP2    | 1 | 3  | 3  | 0.006090028 | 0.249691139 | 0.621354065 |
| P54707               | Potassium-transporting ATPase alpha chain 2                                                                | ATP12A   | 1 | 31 | 27 | 0.018925162 | 0.335368745 | 0.49850936  |
| P55058               | Phospholipid transfer protein                                                                              | PLTP     | 1 | 11 | 11 | 0.045839085 | 0.406142065 | 0.621195832 |
| P55957               | BH3-interacting domain death agonist;BH3-interacting domain death agonist p15;BH3-interacting domain death | BID      | 1 | 7  | 7  | 0.010284848 | 0.288904507 | 1.900101141 |
| P61916               | Epididymal secretory protein E1                                                                            | NPC2     | 1 | 2  | 2  | 0.000886916 | 0.156222299 | 0.487487805 |
| P62753               | 40S ribosomal protein S6                                                                                   | RPS6     | 1 | 9  | 9  | 0.011070867 | 0.288904507 | 1.617600758 |
| P62861               | 40S ribosomal protein S30                                                                                  | FAU      | 1 | 3  | 3  | 0.01169932  | 0.288904507 | 2.310289122 |
| P62873;P16520        | Guanine nucleotide-binding protein G(I)/G(S)/G(T)                                                          | GNB1     | 2 | 21 | 13 | 0.040280843 | 0.39553897  | 0.600605374 |
| P62879               | Guanine nucleotide-binding protein G(I)/G(S)/G(T)                                                          | GNB2     | 1 | 22 | 13 | 0.012849411 | 0.288904507 | 0.620130646 |
| P63167               | Dynein light chain 1, cytoplasmic                                                                          | DYNLL1   | 1 | 5  | 2  | 0.007651762 | 0.256332711 | 0.543341803 |
| P80188               | Neutrophil gelatinase-associated lipocalin                                                                 | LCN2     | 1 | 16 | 16 | 0.006816759 | 0.250067438 | 0.329969015 |
| P98160               | Basement membrane-specific heparan sulfate                                                                 | HSPG2    | 1 | 40 | 40 | 0.007422035 | 0.25441762  | 0.401492956 |
| Q03169               | Tumor necrosis factor alpha-induced protein 2                                                              | TNFAIP2  | 1 | 15 | 15 | 0.001777318 | 0.16158136  | 1.909309407 |
| Q08380               | Galectin-3-binding protein                                                                                 | LGALS3BP | 1 | 25 | 25 | 0.001585858 | 0.156222299 | 0.523509991 |
| Q08AF3;Q7Z7L1;Q68D06 | Schlafen family member 5                                                                                   | SLFN5    | 3 | 5  | 5  | 0.049657167 | 0.413677833 | 1.539539382 |
| Q12805               | EGF-containing fibulin-like extracellular matrix protein 1                                                 | EFEMP1   | 1 | 14 | 14 | 0.002462952 | 0.162354374 | 0.132825436 |
| Q13557               | Calcium/calmodulin-dependent protein kinase type II                                                        | CAMK2D   | 1 | 12 | 7  | 0.044475787 | 0.406142065 | 0.658822411 |
| Q13561               | Dynactin subunit 2                                                                                         | DCTN2    | 1 | 12 | 12 | 0.004701784 | 0.217604496 | 1.770010852 |
| Q15428               | Splicing factor 3A subunit 2                                                                               | SF3A2    | 1 | 5  | 5  | 0.044524991 | 0.406142065 | 1.872995119 |
| Q16270               | Insulin-like growth factor-binding protein 7                                                               | IGFBP7   | 1 | 6  | 6  | 0.002588254 | 0.164001207 | 0.218205392 |
| Q53GD3               | Choline transporter-like protein 4                                                                         | SLC44A4  | 1 | 5  | 5  | 0.001364897 | 0.156222299 | 0.311037996 |
| Q5T601               | Probable G-protein coupled receptor 110                                                                    | GPR110   | 1 | 4  | 4  | 0.01750817  | 0.335368745 | 0.537086046 |
| Q6UXY8               | Transmembrane channel-like protein 5                                                                       | TMC5     | 1 | 19 | 19 | 0.000495091 | 0.147890813 | 0.39353385  |
| Q7Z404               | Transmembrane channel-like protein 4                                                                       | TMC4     | 1 | 16 | 16 | 0.014094423 | 0.299911535 | 0.272668046 |
| Q8IWA5               | Choline transporter-like protein 2                                                                         | SLC44A2  | 1 | 5  | 5  | 0.04096796  | 0.39553897  | 0.585698035 |
| Q8NFJ5               | Retinoic acid-induced protein 3                                                                            | GPRC5A   | 1 | 5  | 5  | 0.001280462 | 0.156222299 | 0.271327341 |
| Q8TDL5               | BPI fold-containing family B member 1                                                                      | BPIFB1   | 1 | 30 | 30 | 0.003362334 | 0.190510668 | 0.219695516 |
| Q8WXH0;Q8NF9         | Nesprin-2                                                                                                  | SYNE2    | 2 | 6  | 6  | 0.02837955  | 0.381706815 | 0.600304236 |
| Q8WXI7               | Mucin-16                                                                                                   | MUC16    | 1 | 39 | 39 | 6.11696E-05 | 0.089439014 | 0.067913747 |
| Q99102               | Mucin-4;Mucin-4 alpha chain;Mucin-4 beta chain                                                             | MUC4     | 1 | 37 | 37 | 0.000758543 | 0.156222299 | 0.291310352 |
| Q99519               | Sialidase-1                                                                                                | NEU1     | 1 | 11 | 11 | 0.048114346 | 0.413677833 | 0.618781335 |
| Q99538               | Legumain                                                                                                   | LGMN     | 1 | 6  | 6  | 0.003320032 | 0.190510668 | 0.491169799 |
| Q9BS26               | Endoplasmic reticulum resident protein 44                                                                  | ERP44    | 1 | 13 | 13 | 0.00248462  | 0.162354374 | 1.5252669   |
| Q9H299               | SH3 domain-binding glutamic acid-rich-like protein 3                                                       | SH3BGL3  | 1 | 2  | 2  | 0.006581037 | 0.249884497 | 1.82341213  |

|        |                                                    |         |   |    |    |             |             |             |
|--------|----------------------------------------------------|---------|---|----|----|-------------|-------------|-------------|
| Q9NP55 | BPI fold-containing family A member 1              | BPIFA1  | 1 | 11 | 11 | 0.026398061 | 0.381306818 | 0.257128053 |
| Q9NTK5 | Obg-like ATPase 1                                  | OLA1    | 1 | 6  | 6  | 0.017049738 | 0.335368745 | 1.565132875 |
| Q9NUQ8 | ATP-binding cassette sub-family F member 3         | ABCF3   | 1 | 10 | 10 | 0.049345467 | 0.413677833 | 1.637955486 |
| Q9P0J0 | NADH dehydrogenase [ubiquinone] 1 alpha subcomplex | NDUFA13 | 1 | 5  | 5  | 0.042497246 | 0.400278111 | 1.508101665 |
| Q9UMX0 | Ubiquilin-1                                        | UBQLN1  | 1 | 10 | 5  | 0.040812118 | 0.39553897  | 1.701204581 |
| Q9Y6R7 | IgGFc-binding protein                              | FCGBP   | 1 | 34 | 34 | 0.048755741 | 0.413677833 | 0.262098735 |

T = 72 h, IFNλ3: CoV-2 / mock

| Uniprot ID                           | Protein Name                                                                                                                                                                              | Gene Names | Number of Proteins | Peptides | Unique Peptides | p-Value     | P <sub>FDR</sub> -Value | Ratio of Means (IFNλ3: CoV-2 / mock) |
|--------------------------------------|-------------------------------------------------------------------------------------------------------------------------------------------------------------------------------------------|------------|--------------------|----------|-----------------|-------------|-------------------------|--------------------------------------|
| O00391                               | Sulfhydryl oxidase 1                                                                                                                                                                      | QSOX1      | 1                  | 17       | 17              | 0.003496243 | 0.131048781             | 0.26728898                           |
| O00468                               | Agrin;Agrin N-terminal 110 kDa subunit;Agrin C-terminal 110 kDa subunit;Agrin C-terminal 90 kDa fragment;Agrin C-                                                                         | AGRN       | 1                  | 34       | 34              | 0.02374311  | 0.209876382             | 0.459290282                          |
| O00560                               | Syntenin-1                                                                                                                                                                                | SDCBP      | 1                  | 8        | 8               | 0.043883847 | 0.268137742             | 0.652539949                          |
| O43490                               | Prominin-1                                                                                                                                                                                | PROM1      | 1                  | 27       | 27              | 0.002535774 | 0.114268328             | 0.120934083                          |
| O43795                               | Unconventional myosin-Ib                                                                                                                                                                  | MYO1B      | 1                  | 22       | 19              | 0.047737639 | 0.274318439             | 0.667414587                          |
| O60341                               | Lysine-specific histone demethylase 1A                                                                                                                                                    | KDM1A      | 1                  | 6        | 6               | 0.010807136 | 0.174121205             | 1.586422554                          |
| O60635                               | Tetraspanin-1                                                                                                                                                                             | TSPAN1     | 1                  | 3        | 3               | 0.019413081 | 0.201895613             | 0.383322046                          |
| O75607                               | Nucleoplasmin-3                                                                                                                                                                           | NPM3       | 1                  | 5        | 5               | 0.029743069 | 0.230588737             | 1.606131099                          |
| O75947                               | ATP synthase subunit d, mitochondrial                                                                                                                                                     | ATP5H      | 1                  | 7        | 7               | 0.042336921 | 0.266117253             | 0.652025612                          |
| O75964                               | ATP synthase subunit g, mitochondrial                                                                                                                                                     | ATP5L      | 1                  | 3        | 3               | 0.008005651 | 0.164010485             | 0.556408153                          |
| O95436                               | Sodium-dependent phosphate transport protein 2B                                                                                                                                           | SLC34A2    | 1                  | 12       | 12              | 0.02401449  | 0.209876382             | 0.433844785                          |
| O95486                               | Protein transport protein Sec24A                                                                                                                                                          | SEC24A     | 1                  | 7        | 7               | 0.000127383 | 0.045921446             | 1.583070072                          |
| P00450;CON_ENSEMBL:ENSBTAP0000031900 | Ceruloplasmin                                                                                                                                                                             | CP         | 2                  | 31       | 31              | 0.014350894 | 0.192801138             | 0.344853319                          |
| P00751                               | Complement factor B;Complement factor B Ba                                                                                                                                                | CFB        | 1                  | 40       | 40              | 0.001089766 | 0.108375899             | 0.190663991                          |
| P01024;CON_Q2UVX4                    | Complement C3;Complement C3 beta chain;C3-beta-c;Complement C3 alpha chain;C3a anaphylatoxin;Acylation stimulating protein;Complement C3b alpha chain;Complement C3c alpha chain fragment | C3         | 2                  | 100      | 100             | 0.000211386 | 0.061268307             | 0.196671547                          |
| P01033                               | Metalloproteinase inhibitor 1                                                                                                                                                             | TIMP1      | 1                  | 7        | 7               | 0.019449607 | 0.201895613             | 0.355146404                          |
| P01034                               | Cystatin-C                                                                                                                                                                                | CST3       | 1                  | 4        | 4               | 0.001155171 | 0.108375899             | 0.323796686                          |
| P01833                               | Polymeric immunoglobulin receptor;Secretory component                                                                                                                                     | PIGR       | 1                  | 42       | 42              | 0.001073589 | 0.108375899             | 0.194373387                          |
| P03973                               | Antileukoproteinase                                                                                                                                                                       | SLPI       | 1                  | 5        | 5               | 0.020471745 | 0.20194832              | 0.188706567                          |
| P06396;REV_Q6TDU7                    | Gelsolin                                                                                                                                                                                  | GSN        | 2                  | 42       | 20              | 0.001119494 | 0.108375899             | 0.616343013                          |
| P06731;P31997;P40198                 | Carcinoembryonic antigen-related cell adhesion molecule 4F2 cell-surface antigen heavy chain                                                                                              | CEACAM5    | 3                  | 13       | 11              | 0.049789408 | 0.276516168             | 0.645827888                          |
| P08195                               | 4F2 cell-surface antigen heavy chain                                                                                                                                                      | SLC3A2     | 1                  | 5        | 5               | 0.038826302 | 0.25604052              | 1.878135544                          |
| P08571                               | Monocyte differentiation antigen CD14;Monocyte differentiation antigen CD14, urinary form;Monocyte                                                                                        | CD14       | 1                  | 7        | 7               | 0.019062908 | 0.201895613             | 0.297424804                          |
| P08603;Q03591;Q02985                 | Complement factor H                                                                                                                                                                       | CFH        | 3                  | 23       | 23              | 0.009184631 | 0.165552967             | 0.223756399                          |
| P09668                               | Pro-cathepsin H;Cathepsin H mini chain;Cathepsin                                                                                                                                          | CTSH       | 1                  | 11       | 11              | 0.0019823   | 0.108375899             | 0.629499588                          |
| P12830                               | Cadherin-1;E-Cad/CTF1;E-Cad/CTF2;E-Cad/CTF3                                                                                                                                               | CDH1       | 1                  | 11       | 11              | 0.005291985 | 0.144893198             | 1.513129633                          |
| P13987                               | CD59 glycoprotein                                                                                                                                                                         | CD59       | 1                  | 4        | 4               | 0.033209063 | 0.238641871             | 0.448699071                          |
| P15328                               | Folate receptor alpha                                                                                                                                                                     | FOLR1      | 1                  | 7        | 7               | 0.004081243 | 0.131935503             | 0.393525129                          |
| P15941                               | Mucin-1;Mucin-1 subunit alpha;Mucin-1 subunit beta                                                                                                                                        | MUC1       | 1                  | 9        | 9               | 1.68405E-05 | 0.036039453             | 0.32964792                           |
| P18827                               | Syndecan-1                                                                                                                                                                                | SDC1       | 1                  | 3        | 3               | 0.008966799 | 0.164010485             | 1.785104941                          |
| P20042                               | Eukaryotic translation initiation factor 2 subunit 2                                                                                                                                      | EIF2S2     | 1                  | 6        | 6               | 0.032862587 | 0.238641871             | 1.56780452                           |
| P20061                               | Transcobalamin-1                                                                                                                                                                          | TCN1       | 1                  | 8        | 8               | 0.02503345  | 0.215660912             | 0.645866756                          |

|                      |                                                                                                          |                   |   |    |    |             |             |             |
|----------------------|----------------------------------------------------------------------------------------------------------|-------------------|---|----|----|-------------|-------------|-------------|
| P25774               | Cathepsin S                                                                                              | CTSS              | 1 | 14 | 14 | 0.003392573 | 0.131048781 | 0.617954052 |
| P27105               | Erythrocyte band 7 integral membrane protein                                                             | STOM              | 1 | 15 | 15 | 0.015165823 | 0.196195789 | 0.542129024 |
| P29034               | Protein S100-A2                                                                                          | S100A2            | 1 | 4  | 4  | 0.031292454 | 0.23501937  | 0.577221298 |
| P29279               | Connective tissue growth factor                                                                          | CTGF              | 1 | 6  | 6  | 0.033007805 | 0.238641871 | 0.61261754  |
| P29992               | Guanine nucleotide-binding protein subunit alpha-11                                                      | GNA11             | 1 | 10 | 4  | 0.02126105  | 0.202051327 | 0.52337909  |
| P31949               | Protein S100-A11;Protein S100-A11, N-terminally                                                          | S100A11           | 1 | 2  | 2  | 0.004431872 | 0.135016054 | 0.599249233 |
| P35241               | Radixin                                                                                                  | RDX               | 1 | 21 | 6  | 0.031968495 | 0.237621495 | 0.612473985 |
| P43353;P48448        | Aldehyde dehydrogenase family 3 member B1                                                                | ALDH3B1           | 2 | 15 | 14 | 0.008355679 | 0.164010485 | 0.555998353 |
| P46060               | Ran GTPase-activating protein 1                                                                          | RANGAP1           | 1 | 13 | 13 | 0.03768638  | 0.253942806 | 1.630038009 |
| P53634               | Dipeptidyl peptidase 1;Dipeptidyl peptidase 1 exclusion domain chain;Dipeptidyl peptidase 1 heavy        | CTSC              | 1 | 19 | 19 | 0.005913988 | 0.154119946 | 0.662544881 |
| P53999               | Activated RNA polymerase II transcriptional coactivator                                                  | SUB1              | 1 | 5  | 5  | 0.005070471 | 0.142434147 | 1.502609686 |
| P54707               | Potassium-transporting ATPase alpha chain 2                                                              | ATP12A            | 1 | 31 | 27 | 0.00800499  | 0.164010485 | 0.590163731 |
| P60903               | Protein S100-A10                                                                                         | S100A10           | 1 | 5  | 5  | 0.005152549 | 0.142884134 | 0.485567543 |
| P60953               | Cell division control protein 42 homolog                                                                 | CDC42             | 1 | 4  | 4  | 0.009023231 | 0.164010485 | 0.529200758 |
| P61956;P55854;Q6EEV6 | Small ubiquitin-related modifier 2;Small ubiquitin-related modifier 3;Small ubiquitin-related modifier 4 | SUMO2;SUMO3;SUMO4 | 3 | 2  | 2  | 0.007835603 | 0.164010485 | 0.565832172 |
| P62191               | 26S protease regulatory subunit 4                                                                        | PSMC1             | 1 | 14 | 14 | 0.001011327 | 0.108375899 | 1.624784795 |
| P62805               | Histone H4                                                                                               | HIST1H4A          | 1 | 13 | 13 | 0.017988467 | 0.201895613 | 0.611721857 |
| P62910               | 60S ribosomal protein L32                                                                                | RPL32             | 1 | 6  | 6  | 0.018388965 | 0.201895613 | 0.55903016  |
| P63000;P60763;P15153 | Ras-related C3 botulinum toxin substrate 1;Ras-related C3                                                | RAC1;RAC3         | 3 | 6  | 6  | 0.02628647  | 0.220378432 | 0.5963184   |
| P80188               | Neutrophil gelatinase-associated lipocalin                                                               | LCN2              | 1 | 16 | 16 | 0.002052453 | 0.108375899 | 0.288985284 |
| Q08380               | Galectin-3-binding protein                                                                               | LGALS3BP          | 1 | 25 | 25 | 0.000467709 | 0.101165453 | 0.498709362 |
| Q08752               | Peptidyl-prolyl cis-trans isomerase D                                                                    | PPID              | 1 | 4  | 4  | 0.001966495 | 0.108375899 | 0.65054818  |
| Q12805               | EGF-containing fibulin-like extracellular matrix protein 1                                               | EFEMP1            | 1 | 14 | 14 | 0.004164366 | 0.132463578 | 0.129058934 |
| Q13418               | Integrin-linked protein kinase                                                                           | ILK               | 1 | 8  | 8  | 0.006728671 | 0.157917902 | 1.572616495 |
| Q16270               | Insulin-like growth factor-binding protein 7                                                             | IGFBP7            | 1 | 6  | 6  | 0.014320189 | 0.192801138 | 0.206925415 |
| Q16719               | Kynureninase                                                                                             | KYNU              | 1 | 5  | 5  | 0.006585825 | 0.157917902 | 1.762251766 |
| Q3YEC7               | Rab-like protein 6                                                                                       | RABL6             | 1 | 11 | 11 | 0.002032753 | 0.108375899 | 1.559725616 |
| Q53GD3               | Choline transporter-like protein 4                                                                       | SLC44A4           | 1 | 5  | 5  | 0.001106842 | 0.108375899 | 0.288574556 |
| Q5T601               | Probable G-protein coupled receptor 110                                                                  | GPR110            | 1 | 4  | 4  | 0.015027783 | 0.196195789 | 0.523570413 |
| Q6DKJ4               | Nucleoredoxin                                                                                            | NXN               | 1 | 4  | 4  | 0.017025301 | 0.199605065 | 1.640254822 |
| Q6IBS0               | Twinfilin-2                                                                                              | TWF2              | 1 | 8  | 8  | 0.024480658 | 0.211806649 | 1.543769365 |
| Q6UXY8               | Transmembrane channel-like protein 5                                                                     | TMC5              | 1 | 19 | 19 | 0.006887589 | 0.157917902 | 0.340414283 |
| Q7Z404               | Transmembrane channel-like protein 4                                                                     | TMC4              | 1 | 16 | 16 | 0.000420282 | 0.101007784 | 0.280411655 |
| Q8N5I2               | Arrestin domain-containing protein 1                                                                     | ARRDC1            | 1 | 3  | 3  | 0.019021784 | 0.201895613 | 0.464598766 |
| Q8NFF5               | FAD synthase;Molybdenum cofactor biosynthesis protein-                                                   | FLAD1             | 1 | 8  | 8  | 0.037569605 | 0.253942806 | 1.701348593 |
| Q8NFI5               | Retinoic acid-induced protein 3                                                                          | GPRC5A            | 1 | 5  | 5  | 0.006496463 | 0.157917902 | 0.359515972 |
| Q8NFL0               | UDP-GlcNAc:betaGal beta-1,3-N-                                                                           | B3GNT7            | 1 | 5  | 5  | 0.043466561 | 0.26690788  | 0.661168791 |
| Q8TBC5               | Zinc finger and SCAN domain-containing protein 18                                                        | ZSCAN18           | 1 | 4  | 4  | 3.44244E-05 | 0.036039453 | 1.535610759 |
| Q8TDL5               | BPI fold-containing family B member 1                                                                    | BPIFB1            | 1 | 30 | 30 | 0.003840384 | 0.131048781 | 0.233356316 |
| Q8WXI7               | Mucin-16                                                                                                 | MUC16             | 1 | 39 | 39 | 0.000943314 | 0.108375899 | 0.049681869 |
| Q92597               | Protein NDRG1                                                                                            | NDRG1             | 1 | 10 | 10 | 0.049664549 | 0.276516168 | 1.534222128 |
| Q92973               | Transportin-1                                                                                            | TNPO1             | 1 | 12 | 8  | 0.018567438 | 0.201895613 | 0.633168412 |
| Q96DI7               | U5 small nuclear ribonucleoprotein 40 kDa protein                                                        | SNRNP40           | 1 | 10 | 10 | 0.01573791  | 0.197913363 | 1.598785622 |

|               |                                                |        |   |    |    |             |             |             |
|---------------|------------------------------------------------|--------|---|----|----|-------------|-------------|-------------|
| Q96FF7        | Uncharacterized protein LOC113230              |        | 1 | 4  | 4  | 0.030972062 | 0.233423591 | 1.895319273 |
| Q96PP9;Q8N8V2 | Guanylate-binding protein 4                    | GBP4   | 2 | 6  | 4  | 0.039541312 | 0.258052466 | 1.562043128 |
| Q96QR8        | Transcriptional activator protein Pur-beta     | PURB   | 1 | 7  | 6  | 0.000226605 | 0.061268307 | 1.706249797 |
| Q99102        | Mucin-4;Mucin-4 alpha chain;Mucin-4 beta chain | MUC4   | 1 | 37 | 37 | 0.003145406 | 0.130921329 | 0.290813604 |
| Q99828        | Calcium and integrin-binding protein 1         | CIB1   | 1 | 10 | 10 | 0.004086768 | 0.131935503 | 0.288487297 |
| Q9NP55        | BPI fold-containing family A member 1          | BPIFA1 | 1 | 11 | 11 | 0.012876078 | 0.187628547 | 0.356669062 |
| Q9UII2        | ATPase inhibitor, mitochondrial                | ATPIF1 | 1 | 5  | 5  | 0.01336903  | 0.188479261 | 0.170653923 |
| Q9Y2A7        | Nck-associated protein 1                       | NCKAP1 | 1 | 12 | 12 | 0.047324908 | 0.274318439 | 1.582510051 |
| Q9Y4W6        | AFG3-like protein 2                            | AFG3L2 | 1 | 5  | 5  | 0.008869189 | 0.164010485 | 1.540030356 |



T = 0 h, IFN / Untreated

| Uniprot ID    | Protein Name                                                                                        | Gene Names  | Number of Proteins | Unique Peptides | Number of Valid Values |                |                |                 |                 | "On"-Group Untreated / IFN $\alpha$ 5 | "On"-Group Untreated / IFN $\alpha$ 7 | "On"-Group Untreated / IFN $\alpha$ 16 | "On"-Group Untreated / IFN $\lambda$ 3 |
|---------------|-----------------------------------------------------------------------------------------------------|-------------|--------------------|-----------------|------------------------|----------------|----------------|-----------------|-----------------|---------------------------------------|---------------------------------------|----------------------------------------|----------------------------------------|
|               |                                                                                                     |             |                    |                 | Untreated              | IFN $\alpha$ 5 | IFN $\alpha$ 7 | IFN $\alpha$ 16 | IFN $\lambda$ 3 |                                       |                                       |                                        |                                        |
| P09913        | Interferon-induced protein with tetratricopeptide                                                   | IFIT2       | 1                  | 21              | 0                      | 4              | 4              | 0               | 4               | IFN $\alpha$ 5                        | IFN $\alpha$ 7                        |                                        | IFN $\lambda$ 3                        |
| P20592        | Interferon-induced GTP-binding protein Mx2                                                          | MX2         | 1                  | 13              | 0                      | 4              | 4              | 0               | 4               | IFN $\alpha$ 5                        | IFN $\alpha$ 7                        |                                        | IFN $\lambda$ 3                        |
| Q53G44        | Interferon-induced protein 44-like                                                                  | IFI44L      | 1                  | 7               | 0                      | 3              | 3              | 0               | 3               | IFN $\alpha$ 5                        | IFN $\alpha$ 7                        |                                        | IFN $\lambda$ 3                        |
| Q8IVU3        | Probable E3 ubiquitin-protein ligase HERC6                                                          | HERC6       | 1                  | 2               | 0                      | 3              | 4              | 0               | 3               | IFN $\alpha$ 5                        | IFN $\alpha$ 7                        |                                        | IFN $\lambda$ 3                        |
| O95786        | Probable ATP-dependent RNA helicase DDX58                                                           | DDX58       | 1                  | 11              | 0                      | 4              | 3              | 0               | 2               | IFN $\alpha$ 5                        | IFN $\alpha$ 7                        |                                        |                                        |
| Q10588        | ADP-ribosyl cyclase/cyclic ADP-ribose hydrolase 2                                                   | BST1        | 1                  | 3               | 0                      | 3              | 1              | 0               | 3               | IFN $\alpha$ 5                        |                                       |                                        | IFN $\lambda$ 3                        |
| Q15646        | 2-5-oligoadenylate synthase-like protein                                                            | OASL        | 1                  | 7               | 0                      | 4              | 2              | 0               | 3               | IFN $\alpha$ 5                        |                                       |                                        | IFN $\lambda$ 3                        |
| A6NHR9        | Structural maintenance of chromosomes flexible hinge domain-containing protein 1                    | SMCHD1      | 1                  | 6               | 0                      | 3              | 2              | 1               | 2               | IFN $\alpha$ 5                        |                                       |                                        |                                        |
| Q8TF05        | Serine/threonine-protein phosphatase 4 regulatory                                                   | PPP4R1      | 1                  | 4               | 0                      | 4              | 1              | 1               | 0               | IFN $\alpha$ 5                        |                                       |                                        |                                        |
| Q9P1F3        | Costars family protein ABRACL                                                                       | ABRACL      | 1                  | 2               | 0                      | 3              | 1              | 1               | 1               | IFN $\alpha$ 5                        |                                       |                                        |                                        |
| Q9UBI1        | COMM domain-containing protein 3                                                                    | COMMMD3     | 1                  | 2               | 0                      | 3              | 2              | 1               | 2               | IFN $\alpha$ 5                        |                                       |                                        |                                        |
| Q9Y224        | UPF0568 protein C14orf166                                                                           | C14orf166   | 1                  | 9               | 0                      | 3              | 1              | 1               | 1               | IFN $\alpha$ 5                        |                                       |                                        |                                        |
| O43324        | Eukaryotic translation elongation factor 1 epsilon-1                                                | EEF1E1      | 1                  | 5               | 3                      | 0              | 1              | 0               | 1               | Untreated                             |                                       | Untreated                              |                                        |
| A3KMH1        | von Willebrand factor A domain-containing protein 8                                                 | VWA8        | 1                  | 5               | 3                      | 0              | 4              | 3               | 3               | Untreated                             |                                       |                                        |                                        |
| P46776        | 60S ribosomal protein L27a                                                                          | RPL27A      | 1                  | 6               | 3                      | 0              | 3              | 1               | 1               | Untreated                             |                                       |                                        |                                        |
| Q8TBF2        | Prostamide/prostaglandin F synthase                                                                 | FAM213B     | 1                  | 3               | 3                      | 0              | 2              | 2               | 2               | Untreated                             |                                       |                                        |                                        |
| Q92785        | Zinc finger protein ubi-d4                                                                          | DPF2        | 1                  | 3               | 3                      | 0              | 4              | 4               | 3               | Untreated                             |                                       |                                        |                                        |
| Q99961;Q99962 | Endophilin-A2                                                                                       | SH3GL1      | 2                  | 5               | 3                      | 0              | 2              | 3               | 4               | Untreated                             |                                       |                                        |                                        |
| Q9BXI6        | TBC1 domain family member 10A                                                                       | TBC1D10A    | 1                  | 3               | 3                      | 0              | 2              | 3               | 2               | Untreated                             |                                       |                                        |                                        |
| P01009        | Alpha-1-antitrypsin;Short peptide from AAT                                                          | SERPINA1    | 1                  | 3               | 0                      | 2              | 3              | 3               | 1               |                                       | IFN $\alpha$ 7                        | IFN $\alpha$ 16                        |                                        |
| Q9NW64        | Pre-mRNA-splicing factor RBM22                                                                      | RBM22       | 1                  | 1               | 0                      | 2              | 3              | 2               | 4               |                                       | IFN $\alpha$ 7                        |                                        | IFN $\lambda$ 3                        |
| O96008        | Mitochondrial import receptor subunit TOM40                                                         | TOMM40      | 1                  | 6               | 0                      | 1              | 3              | 1               | 0               |                                       | IFN $\alpha$ 7                        |                                        |                                        |
| P50583        | Bis(5-nucleosyl)-tetraphosphatase [asymmetrical]                                                    | NUDT2       | 1                  | 5               | 0                      | 2              | 3              | 1               | 2               |                                       | IFN $\alpha$ 7                        |                                        |                                        |
| Q14165        | Malectin                                                                                            | MLEC        | 1                  | 3               | 0                      | 0              | 3              | 1               | 0               |                                       | IFN $\alpha$ 7                        |                                        |                                        |
| Q68D91        | Metallo-beta-lactamase domain-containing protein 2                                                  | MBLAC2      | 1                  | 2               | 3                      | 1              | 0              | 0               | 1               |                                       | Untreated                             | Untreated                              |                                        |
| Q92796        | Disks large homolog 3                                                                               | DLG3        | 1                  | 7               | 3                      | 3              | 0              | 0               | 2               |                                       | Untreated                             | Untreated                              |                                        |
| Q9Y3D6        | Mitochondrial fission 1 protein                                                                     | FIS1        | 1                  | 4               | 3                      | 1              | 0              | 2               | 0               |                                       | Untreated                             |                                        | Untreated                              |
| Q00688        | Peptidyl-prolyl cis-trans isomerase FKBP3                                                           | FKBP3       | 1                  | 7               | 3                      | 1              | 0              | 2               | 3               |                                       | Untreated                             |                                        |                                        |
| Q3B7J2;Q9NXC2 | Glucose-fructose oxidoreductase domain-containing protein 2;Glucose-fructose oxidoreductase domain- | GFOD2;GFOD1 | 2                  | 2               | 3                      | 2              | 0              | 2               | 1               |                                       | Untreated                             |                                        |                                        |
| Q8IYI6        | Exocyst complex component 8                                                                         | EXOC8       | 1                  | 2               | 0                      | 1              | 2              | 3               | 0               |                                       |                                       | IFN $\alpha$ 16                        |                                        |
| Q99569        | Plakophilin-4                                                                                       | PKP4        | 1                  | 7               | 0                      | 1              | 1              | 3               | 2               |                                       |                                       | IFN $\alpha$ 16                        |                                        |
| Q9H2P0        | Activity-dependent neuroprotector homeobox                                                          | ADNP        | 1                  | 3               | 0                      | 1              | 0              | 3               | 1               |                                       |                                       | IFN $\alpha$ 16                        |                                        |
| P18621        | 60S ribosomal protein L17                                                                           | RPL17       | 1                  | 5               | 3                      | 3              | 3              | 0               | 0               |                                       |                                       | Untreated                              | Untreated                              |
| O94919        | Endonuclease domain-containing 1 protein                                                            | ENDOD1      | 1                  | 3               | 3                      | 1              | 3              | 0               | 1               |                                       |                                       | Untreated                              |                                        |
| P00813        | Adenosine deaminase                                                                                 | ADA         | 1                  | 3               | 3                      | 1              | 2              | 0               | 1               |                                       |                                       | Untreated                              |                                        |
| P04233        | HLA class II histocompatibility antigen gamma chain                                                 | CD74        | 1                  | 3               | 3                      | 1              | 3              | 0               | 1               |                                       |                                       | Untreated                              |                                        |
| Q15334        | Lethal(2) giant larvae protein homolog 1                                                            | LLGL1       | 1                  | 3               | 3                      | 2              | 2              | 0               | 2               |                                       |                                       | Untreated                              |                                        |
| Q9UHY7        | Enolase-phosphatase E1                                                                              | ENOPH1      | 1                  | 6               | 4                      | 1              | 4              | 0               | 3               |                                       |                                       | Untreated                              |                                        |
| Q8IY21        | Probable ATP-dependent RNA helicase DDX60                                                           | DDX60       | 1                  | 5               | 0                      | 1              | 1              | 0               | 3               |                                       |                                       |                                        | IFN $\lambda$ 3                        |
| O14929        | Histone acetyltransferase type B catalytic subunit                                                  | HAT1        | 1                  | 4               | 3                      | 3              | 2              | 2               | 0               |                                       |                                       |                                        | Untreated                              |
| Q14802        | FXVD domain-containing ion transport regulator 3                                                    | FXVD3       | 1                  | 1               | 3                      | 1              | 1              | 1               | 0               |                                       |                                       |                                        | Untreated                              |
| Q15506        | Sperm surface protein Sp17                                                                          | SPA17       | 1                  | 6               | 3                      | 1              | 3              | 1               | 0               |                                       |                                       |                                        | Untreated                              |
| Q969V3        | Nicalin                                                                                             | NCLN        | 1                  | 8               | 4                      | 3              | 3              | 3               | 0               |                                       |                                       |                                        | Untreated                              |

|        |                                                       |        |   |   |   |   |   |   |   |  |  |  |           |
|--------|-------------------------------------------------------|--------|---|---|---|---|---|---|---|--|--|--|-----------|
| Q96S44 | TP53-regulating kinase                                | TP53RK | 1 | 1 | 3 | 2 | 2 | 2 | 0 |  |  |  | Untreated |
| Q9BSY4 | Coiled-coil-helix-coiled-coil-helix domain-containing | CHCHD5 | 1 | 5 | 3 | 3 | 3 | 2 | 0 |  |  |  | Untreated |
| Q9UHQ9 | NADH-cytochrome b5 reductase 1                        | CYB5R1 | 1 | 8 | 3 | 1 | 2 | 3 | 0 |  |  |  | Untreated |
| Q9UN37 | Vacuolar protein sorting-associated protein 4A        | VPS4A  | 1 | 5 | 3 | 3 | 2 | 3 | 0 |  |  |  | Untreated |

T = 72h, (mock) IFN / Untreated

| Uniprot ID    | Protein Name                                                       | Gene Names | Number of Proteins | Unique Peptides | Number of Valid Values |                |                |                 |                 | "On"-Group Untreated / IFN $\alpha$ 5 | "On"-Group Untreated / IFN $\alpha$ 7 | "On"-Group Untreated / IFN $\alpha$ 16 | "On"-Group Untreated / IFN $\lambda$ 3 |
|---------------|--------------------------------------------------------------------|------------|--------------------|-----------------|------------------------|----------------|----------------|-----------------|-----------------|---------------------------------------|---------------------------------------|----------------------------------------|----------------------------------------|
|               |                                                                    |            |                    |                 | Untreated              | IFN $\alpha$ 5 | IFN $\alpha$ 7 | IFN $\alpha$ 16 | IFN $\lambda$ 3 |                                       |                                       |                                        |                                        |
| Q9BYD1        | 39S ribosomal protein L13,                                         | MRPL13     | 1                  | 6               | 0                      | 3              | 3              | 3               | 1               | IFN $\alpha$ 5                        | IFN $\alpha$ 7                        | IFN $\alpha$ 16                        |                                        |
| O95786        | Probable ATP-dependent RNA helicase                                | DDX58      | 1                  | 11              | 0                      | 4              | 4              | 0               | 4               | IFN $\alpha$ 5                        | IFN $\alpha$ 7                        |                                        | IFN $\lambda$ 3                        |
| Q53G44        | Interferon-induced protein 44-like                                 | IFI44L     | 1                  | 7               | 0                      | 4              | 4              | 0               | 4               | IFN $\alpha$ 5                        | IFN $\alpha$ 7                        |                                        | IFN $\lambda$ 3                        |
| Q8TCB0        | Interferon-induced protein 44                                      | IFI44      | 1                  | 6               | 0                      | 4              | 3              | 0               | 4               | IFN $\alpha$ 5                        | IFN $\alpha$ 7                        |                                        | IFN $\lambda$ 3                        |
| O75150;Q5VTR2 | E3 ubiquitin-protein ligase BRE1B                                  | RNF40      | 2                  | 3               | 0                      | 3              | 1              | 1               | 3               | IFN $\alpha$ 5                        |                                       |                                        | IFN $\lambda$ 3                        |
| Q15646        | 2-5-oligoadenylate synthase-like protein                           | OASL       | 1                  | 7               | 0                      | 4              | 1              | 0               | 4               | IFN $\alpha$ 5                        |                                       |                                        | IFN $\lambda$ 3                        |
| Q8IY21        | Probable ATP-dependent RNA helicase                                | DDX60      | 1                  | 5               | 0                      | 3              | 2              | 0               | 3               | IFN $\alpha$ 5                        |                                       |                                        | IFN $\lambda$ 3                        |
| Q9H0J9        | Poly [ADP-ribose] polymerase 12                                    | PARP12     | 1                  | 4               | 0                      | 4              | 2              | 2               | 4               | IFN $\alpha$ 5                        |                                       |                                        | IFN $\lambda$ 3                        |
| Q9Y508        | E3 ubiquitin-protein ligase RNF114                                 | RNF114     | 1                  | 3               | 0                      | 3              | 1              | 0               | 4               | IFN $\alpha$ 5                        |                                       |                                        | IFN $\lambda$ 3                        |
| O00629        | Importin subunit alpha-3                                           | KPNA4      | 1                  | 6               | 0                      | 3              | 0              | 2               | 2               | IFN $\alpha$ 5                        |                                       |                                        |                                        |
| Q13325        | Interferon-induced protein with                                    | IFIT5      | 1                  | 2               | 0                      | 3              | 2              | 0               | 2               | IFN $\alpha$ 5                        |                                       |                                        |                                        |
| Q8TDB6        | E3 ubiquitin-protein ligase DTX3L                                  | DTX3L      | 1                  | 5               | 0                      | 3              | 1              | 0               | 2               | IFN $\alpha$ 5                        |                                       |                                        |                                        |
| P12074        | Cytochrome c oxidase subunit 6A1,                                  | COX6A1     | 1                  | 1               | 3                      | 0              | 0              | 0               | 1               | Untreated                             | Untreated                             | Untreated                              |                                        |
| P51178        | 1-phosphatidylinositol 4,5-bisphosphate                            | PLCD1      | 1                  | 6               | 3                      | 0              | 1              | 0               | 1               | Untreated                             |                                       | Untreated                              |                                        |
| Q9NQC8        | Intraflagellar transport protein 46                                | IFT46      | 1                  | 2               | 3                      | 0              | 1              | 0               | 1               | Untreated                             |                                       | Untreated                              |                                        |
| Q05655        | Protein kinase C delta type;Protein kinase C delta type regulatory | PRKCD      | 1                  | 4               | 4                      | 0              | 2              | 2               | 0               | Untreated                             |                                       |                                        | Untreated                              |
| Q02880;P11388 | DNA topoisomerase 2-beta                                           | TOP2B      | 2                  | 7               | 3                      | 0              | 2              | 3               | 2               | Untreated                             |                                       |                                        |                                        |
| Q99598        | Translin-associated protein X                                      | TSNAX      | 1                  | 5               | 3                      | 0              | 1              | 3               | 1               | Untreated                             |                                       |                                        |                                        |
| Q86VS8        | Protein Hook homolog 3                                             | HOOK3      | 1                  | 5               | 0                      | 1              | 3              | 3               | 3               |                                       | IFN $\alpha$ 7                        | IFN $\alpha$ 16                        | IFN $\lambda$ 3                        |
| Q9UID3        | Vacuolar protein sorting-associated                                | VP551      | 1                  | 5               | 0                      | 1              | 3              | 3               | 3               |                                       | IFN $\alpha$ 7                        | IFN $\alpha$ 16                        | IFN $\lambda$ 3                        |
| P78424        | POU domain, class 6, transcription factor                          | POU6F2     | 1                  | 2               | 0                      | 0              | 4              | 3               | 1               |                                       | IFN $\alpha$ 7                        | IFN $\alpha$ 16                        |                                        |
| Q3SYG4        | Protein PTHB1                                                      | BBS9       | 1                  | 5               | 0                      | 2              | 3              | 3               | 2               |                                       | IFN $\alpha$ 7                        | IFN $\alpha$ 16                        |                                        |
| Q86VM9        | Zinc finger CCCH domain-containing                                 | ZC3H18     | 1                  | 5               | 0                      | 1              | 3              | 3               | 2               |                                       | IFN $\alpha$ 7                        | IFN $\alpha$ 16                        |                                        |
| Q9ULX6        | A-kinase anchor protein 8-like                                     | AKAP8L     | 1                  | 3               | 0                      | 1              | 3              | 1               | 4               |                                       | IFN $\alpha$ 7                        |                                        | IFN $\lambda$ 3                        |
| O60449        | Lymphocyte antigen 75                                              | LY75       | 1                  | 2               | 0                      | 2              | 3              | 1               | 1               |                                       | IFN $\alpha$ 7                        |                                        |                                        |
| O94811        | Tubulin polymerization-promoting                                   | TPPP       | 1                  | 3               | 0                      | 1              | 3              | 0               | 1               |                                       | IFN $\alpha$ 7                        |                                        |                                        |
| P39748        | Flap endonuclease 1                                                | FEN1       | 1                  | 2               | 0                      | 1              | 3              | 2               | 2               |                                       | IFN $\alpha$ 7                        |                                        |                                        |
| P46937        | Transcriptional coactivator YAP1                                   | YAP1       | 1                  | 5               | 0                      | 1              | 3              | 0               | 1               |                                       | IFN $\alpha$ 7                        |                                        |                                        |
| Q16222        | UDP-N-acetylhexosamine pyrophosphorylase;UDP-N-acetylgalactosamine | UAP1       | 1                  | 3               | 0                      | 0              | 3              | 0               | 2               |                                       | IFN $\alpha$ 7                        |                                        |                                        |
| Q16610        | Extracellular matrix protein 1                                     | ECM1       | 1                  | 5               | 0                      | 1              | 3              | 1               | 1               |                                       | IFN $\alpha$ 7                        |                                        |                                        |
| Q7LG56;P31350 | Ribonucleoside-diphosphate reductase subunit M2 B;Ribonucleoside-  | RRM2B;RRM2 | 2                  | 2               | 0                      | 1              | 3              | 2               | 1               |                                       | IFN $\alpha$ 7                        |                                        |                                        |
| Q9H1C7        | Cysteine-rich and transmembrane                                    | CYSTM1     | 1                  | 1               | 0                      | 1              | 3              | 1               | 0               |                                       | IFN $\alpha$ 7                        |                                        |                                        |
| Q9UEW8        | STE20/SPS1-related proline-alanine-rich                            | STK39      | 1                  | 5               | 0                      | 2              | 3              | 1               | 2               |                                       | IFN $\alpha$ 7                        |                                        |                                        |
| Q9UI30        | Multifunctional methyltransferase                                  | TRMT112    | 1                  | 3               | 0                      | 2              | 3              | 1               | 1               |                                       | IFN $\alpha$ 7                        |                                        |                                        |
| Q9GZY8        | Mitochondrial fission factor                                       | MFF        | 1                  | 5               | 3                      | 2              | 0              | 0               | 0               |                                       | Untreated                             | Untreated                              | Untreated                              |
| P17096        | High mobility group protein HMG-                                   | HMG1       | 1                  | 3               | 3                      | 2              | 0              | 1               | 0               |                                       | Untreated                             |                                        | Untreated                              |

|                          |                                                                                   |               |   |   |   |   |   |   |   |  |           |                 |                 |
|--------------------------|-----------------------------------------------------------------------------------|---------------|---|---|---|---|---|---|---|--|-----------|-----------------|-----------------|
| Q07617                   | Sperm-associated antigen 1                                                        | SPAG1         | 1 | 3 | 4 | 3 | 0 | 2 | 2 |  | Untreated |                 |                 |
| Q15653                   | NF-kappa-B inhibitor beta                                                         | NFKBIB        | 1 | 5 | 4 | 3 | 0 | 2 | 3 |  | Untreated |                 |                 |
| Q5TAQ9                   | DDB1- and CUL4-associated factor 8                                                | DCAF8         | 1 | 2 | 3 | 2 | 0 | 2 | 4 |  | Untreated |                 |                 |
| Q9NXG6                   | Transmembrane prolyl 4-hydroxylase                                                | P4HTM         | 1 | 3 | 3 | 1 | 0 | 1 | 3 |  | Untreated |                 |                 |
| Q9Y3X0                   | Coiled-coil domain-containing protein 9                                           | CCDC9         | 1 | 6 | 0 | 2 | 2 | 3 | 4 |  |           | IFN $\alpha$ 16 | IFN $\lambda$ 3 |
| O75531                   | Barrier-to-autointegration factor;Barrier-to-autointegration factor, N-terminally | BANF1         | 1 | 4 | 0 | 2 | 2 | 3 | 1 |  |           | IFN $\alpha$ 16 |                 |
| P28300                   | Protein-lysine 6-oxidase                                                          | LOX           | 1 | 2 | 0 | 2 | 0 | 3 | 1 |  |           | IFN $\alpha$ 16 |                 |
| Q8WUA7                   | TBC1 domain family member 22A                                                     | TBC1D22A      | 1 | 2 | 0 | 0 | 1 | 3 | 1 |  |           | IFN $\alpha$ 16 |                 |
| Q969E4;Q5H9L2;<br>Q6IPX3 | Transcription elongation factor A protein-like 3;Transcription elongation         | TCEAL3;TCEAL5 | 3 | 5 | 0 | 2 | 1 | 3 | 2 |  |           | IFN $\alpha$ 16 |                 |
| O00471                   | Exocyst complex component 5                                                       | EXOC5         | 1 | 3 | 3 | 2 | 2 | 0 | 4 |  |           | Untreated       |                 |
| P08397                   | Porphobilinogen deaminase                                                         | HMBS          | 1 | 4 | 3 | 2 | 1 | 0 | 3 |  |           | Untreated       |                 |
| P13164;Q01629            | Interferon-induced transmembrane protein 1;Interferon-induced                     | IFITM1;IFITM2 | 2 | 1 | 3 | 2 | 1 | 0 | 1 |  |           | Untreated       |                 |
| P27144                   | Adenylate kinase 4, mitochondrial                                                 | AK4           | 1 | 4 | 4 | 2 | 3 | 0 | 2 |  |           | Untreated       |                 |
| Q7L2H7                   | Eukaryotic translation initiation factor 3                                        | EIF3M         | 1 | 4 | 4 | 2 | 3 | 0 | 3 |  |           | Untreated       |                 |
| Q96A72                   | Protein mago nashi homolog 2                                                      | MAGOHB        | 1 | 1 | 4 | 2 | 4 | 0 | 4 |  |           | Untreated       |                 |
| Q9BWS9                   | Chitinase domain-containing protein 1                                             | CHID1         | 1 | 4 | 4 | 1 | 2 | 0 | 1 |  |           | Untreated       |                 |
| Q9NPF4                   | Probable tRNA N6-adenosine                                                        | OSGEP         | 1 | 7 | 3 | 1 | 4 | 0 | 3 |  |           | Untreated       |                 |
| Q2TAC2                   | Coiled-coil domain-containing protein                                             | CCDC57        | 1 | 4 | 0 | 0 | 2 | 2 | 3 |  |           |                 | IFN $\lambda$ 3 |
| Q8IVU3                   | Probable E3 ubiquitin-protein ligase                                              | HERC6         | 1 | 2 | 0 | 2 | 1 | 0 | 3 |  |           |                 | IFN $\lambda$ 3 |
| Q96BJ8                   | Engulfment and cell motility protein 3                                            | ELMO3         | 1 | 4 | 0 | 1 | 0 | 1 | 3 |  |           |                 | IFN $\lambda$ 3 |
| Q9P2R7                   | Succinyl-CoA ligase [ADP-forming]                                                 | SUCLA2        | 1 | 3 | 0 | 1 | 2 | 1 | 3 |  |           |                 | IFN $\lambda$ 3 |
| P61619                   | Protein transport protein Sec61 subunit                                           | SEC61A1       | 1 | 1 | 3 | 3 | 1 | 1 | 0 |  |           |                 | Untreated       |
| Q16537                   | Serine/threonine-protein phosphatase 2A 56 kDa regulatory subunit epsilon         | PPP2R5E       | 1 | 1 | 3 | 2 | 2 | 1 | 0 |  |           |                 | Untreated       |
| Q16555                   | Dihydropyrimidinase-related protein 2                                             | DPYSL2        | 1 | 5 | 4 | 3 | 3 | 3 | 0 |  |           |                 | Untreated       |
| Q86TU7                   | Histone-lysine N-methyltransferase                                                | SETD3         | 1 | 3 | 3 | 2 | 2 | 2 | 0 |  |           |                 | Untreated       |
| Q9BRX8                   | Redox-regulatory protein FAM213A                                                  | FAM213A       | 1 | 5 | 3 | 4 | 2 | 1 | 0 |  |           |                 | Untreated       |

T = 72h, (CoV-2) IFN / Untreated

| Uniprot ID           | Protein Name                                                                                                                | Gene Names      | Number of Proteins | Unique Peptides | Number of Valid Values |       |       |        |       | "On"-Group Untreated / IFNα5 | "On"-Group Untreated / IFNα7 | "On"-Group Untreated / IFNα16 | "On"-Group Untreated / IFNλ3 |
|----------------------|-----------------------------------------------------------------------------------------------------------------------------|-----------------|--------------------|-----------------|------------------------|-------|-------|--------|-------|------------------------------|------------------------------|-------------------------------|------------------------------|
|                      |                                                                                                                             |                 |                    |                 | Untreated              | IFNα5 | IFNα7 | IFNα16 | IFNλ3 |                              |                              |                               |                              |
| Q14497               | AT-rich interactive domain-containing                                                                                       | ARID1A          | 1                  | 3               | 0                      | 3     | 3     | 3      | 2     | IFNα5                        | IFNα7                        | IFNα16                        |                              |
| P20592               | Interferon-induced GTP-binding protein Mx2                                                                                  | MX2             | 1                  | 13              | 0                      | 4     | 4     | 1      | 4     | IFNα5                        | IFNα7                        |                               | IFNλ3                        |
| P52630               | Signal transducer and activator of                                                                                          | STAT2           | 1                  | 5               | 0                      | 4     | 4     | 1      | 3     | IFNα5                        | IFNα7                        |                               | IFNλ3                        |
| Q460N5               | Poly [ADP-ribose] polymerase 14                                                                                             | PARP14          | 1                  | 4               | 0                      | 4     | 4     | 2      | 4     | IFNα5                        | IFNα7                        |                               | IFNλ3                        |
| Q53G44               | Interferon-induced protein 44-like                                                                                          | IFI44L          | 1                  | 7               | 0                      | 4     | 4     | 1      | 4     | IFNα5                        | IFNα7                        |                               | IFNλ3                        |
| Q8TCB0               | Interferon-induced protein 44                                                                                               | IFI44           | 1                  | 6               | 0                      | 4     | 3     | 0      | 4     | IFNα5                        | IFNα7                        |                               | IFNλ3                        |
| P06703               | Protein S100-A6                                                                                                             | S100A6          | 1                  | 2               | 0                      | 3     | 3     | 2      | 1     | IFNα5                        | IFNα7                        |                               |                              |
| Q15646               | 2-5-oligoadenylate synthase-like protein                                                                                    | OASL            | 1                  | 7               | 0                      | 4     | 1     | 0      | 4     | IFNα5                        |                              |                               | IFNλ3                        |
| Q969E4;Q5H9L2;Q6IPX3 | Transcription elongation factor A protein-like 3;Transcription elongation factor A protein-                                 | TCEAL3;TCEAL5   | 3                  | 5               | 0                      | 3     | 2     | 2      | 1     | IFNα5                        |                              |                               |                              |
| Q9H0A8               | COMM domain-containing protein 4                                                                                            | COMMD4          | 1                  | 2               | 3                      | 0     | 0     | 0      | 0     | untreated                    | untreated                    | untreated                     | untreated                    |
| Q16537               | Serine/threonine-protein phosphatase 2A 56 kDa regulatory subunit epsilon isoform                                           | PPP2R5E         | 1                  | 1               | 3                      | 0     | 0     | 2      | 1     | untreated                    | untreated                    |                               |                              |
| Q9H4K1               | RIB43A-like with coiled-coils protein 2                                                                                     | RIBC2           | 1                  | 6               | 3                      | 0     | 0     | 2      | 3     | untreated                    | untreated                    |                               |                              |
| Q969E2               | Secretory carrier-associated membrane                                                                                       | SCAMP4          | 1                  | 2               | 3                      | 0     | 3     | 2      | 0     | untreated                    |                              |                               | untreated                    |
| P16070               | CD44 antigen                                                                                                                | CD44            | 1                  | 2               | 4                      | 0     | 3     | 2      | 3     | untreated                    |                              |                               |                              |
| P27708               | CAD protein;Glutamine-dependent carbamoyl-phosphate synthase;Aspartate                                                      | CAD             | 1                  | 6               | 3                      | 0     | 3     | 2      | 2     | untreated                    |                              |                               |                              |
| P61619               | Protein transport protein Sec61 subunit                                                                                     | SEC61A1         | 1                  | 1               | 3                      | 0     | 2     | 2      | 3     | untreated                    |                              |                               |                              |
| O43823               | A-kinase anchor protein 8                                                                                                   | AKAP8           | 1                  | 4               | 0                      | 0     | 3     | 3      | 4     |                              | IFNα7                        | IFNα16                        | IFNλ3                        |
| Q12824               | SWI/SNF-related matrix-associated actin-dependent regulator of chromatin subfamily                                          | SMARCB1         | 1                  | 4               | 0                      | 0     | 3     | 3      | 0     |                              | IFNα7                        | IFNα16                        |                              |
| Q86WA8               | Lon protease homolog 2, peroxisomal                                                                                         | LONP2           | 1                  | 2               | 0                      | 2     | 3     | 3      | 2     |                              | IFNα7                        | IFNα16                        |                              |
| Q96HN2               | Putative adenosylhomocysteinase 3                                                                                           | AHCYL2          | 1                  | 3               | 0                      | 1     | 3     | 3      | 2     |                              | IFNα7                        | IFNα16                        |                              |
| P21127;Q9UQ88        | Cyclin-dependent kinase 11B;Cyclin-                                                                                         | CDK11B;CDK11A   | 2                  | 7               | 0                      | 1     | 3     | 2      | 3     |                              | IFNα7                        |                               | IFNλ3                        |
| Q5H9R7               | Serine/threonine-protein phosphatase 6                                                                                      | PPP6R3          | 1                  | 4               | 0                      | 2     | 3     | 2      | 3     |                              | IFNα7                        |                               | IFNλ3                        |
| O60264;P28370        | SWI/SNF-related matrix-associated actin-dependent regulator of chromatin subfamily A member 5;Probable global transcription | SMARCA5;SMARCA1 | 2                  | 4               | 0                      | 2     | 3     | 0      | 2     |                              | IFNα7                        |                               |                              |
| O75152;A0A1B0GTU1    | Zinc finger CCCH domain-containing protein 11A                                                                              | ZC3H11A         | 2                  | 2               | 0                      | 1     | 3     | 1      | 1     |                              | IFNα7                        |                               |                              |
| O75531               | Barrier-to-autointegration factor;Barrier-to-autointegration factor, N-terminally                                           | BANF1           | 1                  | 4               | 0                      | 1     | 3     | 1      | 2     |                              | IFNα7                        |                               |                              |
| P04181               | Ornithine aminotransferase, mitochondrial;Ornithine aminotransferase, hepatic form;Ornithine aminotransferase,              | OAT             | 1                  | 5               | 0                      | 0     | 4     | 1      | 2     |                              | IFNα7                        |                               |                              |
| P20794;Q9UPZ9        | Serine/threonine-protein kinase MAK;Serine/threonine-protein kinase ICK                                                     | MAK;ICK         | 2                  | 3               | 0                      | 0     | 3     | 2      | 1     |                              | IFNα7                        |                               |                              |
| Q13444               | Disintegrin and metalloproteinase domain-                                                                                   | ADAM15          | 1                  | 3               | 0                      | 1     | 3     | 1      | 0     |                              | IFNα7                        |                               |                              |
| Q92615               | La-related protein 4B                                                                                                       | LARP4B          | 1                  | 5               | 0                      | 2     | 3     | 1      | 2     |                              | IFNα7                        |                               |                              |
| Q96JM3               | Chromosome alignment-maintaining                                                                                            | CHAMP1          | 1                  | 2               | 0                      | 1     | 3     | 1      | 2     |                              | IFNα7                        |                               |                              |
| Q9UG63               | ATP-binding cassette sub-family F member 2                                                                                  | ABCF2           | 1                  | 2               | 0                      | 1     | 3     | 2      | 1     |                              | IFNα7                        |                               |                              |
| Q9UNX3               | 60S ribosomal protein L26-like 1                                                                                            | RPL26L1         | 1                  | 2               | 0                      | 2     | 3     | 2      | 1     |                              | IFNα7                        |                               |                              |

|               |                                                                       |              |   |   |   |   |   |   |   |  |           |           |           |
|---------------|-----------------------------------------------------------------------|--------------|---|---|---|---|---|---|---|--|-----------|-----------|-----------|
| Q9Y3B3        | Transmembrane emp24 domain-containing                                 | TMED7        | 1 | 2 | 3 | 1 | 0 | 0 | 0 |  | untreated | untreated | untreated |
| P17096        | High mobility group protein HMG-I/HMG-Y                               | HMGA1        | 1 | 3 | 3 | 2 | 0 | 1 | 0 |  | untreated |           | untreated |
| O15239        | NADH dehydrogenase [ubiquinone] 1 alpha                               | NDUFA1       | 1 | 2 | 3 | 3 | 0 | 2 | 2 |  | untreated |           |           |
| P12074        | Cytochrome c oxidase subunit 6A1,                                     | COX6A1       | 1 | 1 | 3 | 2 | 0 | 2 | 1 |  | untreated |           |           |
| P49662;Q6UXS9 | Caspase-4;Caspase-4 subunit 1;Caspase-4 subunit 2;inactive caspase-12 | CASP4;CASP12 | 2 | 2 | 3 | 2 | 0 | 2 | 2 |  | untreated |           |           |
| P53801        | Pituitary tumor-transforming gene 1 protein-                          | PTTG1IP      | 1 | 1 | 4 | 3 | 0 | 1 | 3 |  | untreated |           |           |
| Q13907        | Isopentenyl-diphosphate Delta-isomerase 1                             | IDI1         | 1 | 4 | 4 | 4 | 0 | 2 | 2 |  | untreated |           |           |
| Q2VPB7        | AP-5 complex subunit beta-1                                           | AP5B1        | 1 | 3 | 3 | 3 | 0 | 2 | 2 |  | untreated |           |           |
| Q6P9B6        | TLD domain-containing protein 1                                       | TLDC1        | 1 | 3 | 3 | 4 | 0 | 3 | 3 |  | untreated |           |           |
| Q8NEG2        | Uncharacterized protein C7orf57                                       | C7orf57      | 1 | 3 | 3 | 2 | 0 | 2 | 1 |  | untreated |           |           |
| Q8WZ42        | Titin                                                                 | TTN          | 1 | 4 | 3 | 2 | 0 | 2 | 1 |  | untreated |           |           |
| Q96IX5        | Up-regulated during skeletal muscle growth                            | USMG5        | 1 | 2 | 4 | 2 | 0 | 3 | 3 |  | untreated |           |           |
| Q96KG9        | N-terminal kinase-like protein                                        | SCYL1        | 1 | 2 | 3 | 1 | 0 | 3 | 2 |  | untreated |           |           |
| Q9H0R4        | Haloacid dehalogenase-like hydrolase                                  | HDHD2        | 1 | 3 | 4 | 2 | 0 | 2 | 1 |  | untreated |           |           |
| Q9NRD5        | PRKCA-binding protein                                                 | PICK1        | 1 | 2 | 3 | 1 | 0 | 3 | 3 |  | untreated |           |           |
| O43464;P83110 | Serine protease HTRA2, mitochondrial                                  | HTRA2        | 2 | 6 | 3 | 3 | 1 | 0 | 0 |  |           | untreated | untreated |
| Q96FX7        | tRNA (adenine(58)-N(1))-methyltransferase catalytic subunit TRMT61A   | TRMT61A      | 1 | 3 | 3 | 2 | 2 | 0 | 0 |  |           | untreated | untreated |
| P50281        | Matrix metalloproteinase-14                                           | MMP14        | 1 | 3 | 3 | 2 | 2 | 0 | 1 |  |           | untreated |           |
| Q06587        | E3 ubiquitin-protein ligase RING1                                     | RING1        | 1 | 3 | 3 | 3 | 4 | 0 | 2 |  |           | untreated |           |
| Q16555        | Dihydropyrimidinase-related protein 2                                 | DPYSL2       | 1 | 5 | 4 | 2 | 4 | 0 | 1 |  |           | untreated |           |
| Q56VL3        | OCIA domain-containing protein 2                                      | OCIAD2       | 1 | 3 | 4 | 3 | 1 | 0 | 1 |  |           | untreated |           |
| O15212        | Prefoldin subunit 6                                                   | PFDN6        | 1 | 2 | 0 | 1 | 2 | 1 | 3 |  |           |           | IFNλ3     |
| P62633        | Cellular nucleic acid-binding protein                                 | CNBP         | 1 | 2 | 0 | 1 | 2 | 2 | 3 |  |           |           | IFNλ3     |
| Q00059        | Transcription factor A, mitochondrial                                 | TFAM         | 1 | 2 | 0 | 1 | 0 | 1 | 3 |  |           |           | IFNλ3     |
| Q96C10        | Probable ATP-dependent RNA helicase                                   | DHX58        | 1 | 3 | 0 | 2 | 0 | 0 | 3 |  |           |           | IFNλ3     |
| Q9NQX3        | Gephyrin;Molybdopterin adenyltransferase;Molybdopterin                | GPHN         | 1 | 4 | 0 | 2 | 0 | 2 | 3 |  |           |           | IFNλ3     |
| A1A5D9        | Bicaudal D-related protein 2                                          | CCDC64B      | 1 | 9 | 3 | 3 | 1 | 2 | 0 |  |           |           | untreated |
| O60888        | Protein CutA                                                          | CUTA         | 1 | 3 | 3 | 3 | 3 | 1 | 0 |  |           |           | untreated |
| Q2TAC6        | Kinesin-like protein KIF19                                            | KIF19        | 1 | 4 | 3 | 1 | 2 | 2 | 0 |  |           |           | untreated |

T = 72 h, CoV-2 / mock

| Uniprot ID        | Protein Name                                                                              | Gene Names     | Number of Proteins | Unique Peptides | Number of Valid Values |                  |               |              |               |              |                |               |               |              | "On"-Group Untreated: CoV-2 / | "On"-Group IFNα5: CoV-2 / mock | "On"-Group IFNα7: CoV-2 / mock | "On"-Group IFNα16: CoV-2 / mock | "On"-Group IFNα3: CoV-2 / mock |
|-------------------|-------------------------------------------------------------------------------------------|----------------|--------------------|-----------------|------------------------|------------------|---------------|--------------|---------------|--------------|----------------|---------------|---------------|--------------|-------------------------------|--------------------------------|--------------------------------|---------------------------------|--------------------------------|
|                   |                                                                                           |                |                    |                 | Untreated (CoV-2)      | Untreated (mock) | IFNα5 (CoV-2) | IFNα5 (mock) | IFNα7 (CoV-2) | IFNα7 (mock) | IFNα16 (CoV-2) | IFNα16 (mock) | IFNα3 (CoV-2) | IFNα3 (mock) |                               |                                |                                |                                 |                                |
| Q96KG9            | N-terminal kinase-like protein                                                            | SCYL1          | 1                  | 2               | 3                      | 0                | 1             | 0            | 1             | 0            | 3              | 0             | 2             | 0            | CoV-2                         |                                |                                |                                 |                                |
| Q3SYG4            | Protein PTHB1                                                                             | BBS9           | 1                  | 5               | 3                      | 0                | 3             | 2            | 4             | 3            | 2              | 3             | 3             | 2            | CoV-2                         |                                |                                |                                 |                                |
| Q86VM9            | Zinc finger CCCH domain-containing protein                                                | ZC3H18         | 1                  | 5               | 3                      | 0                | 3             | 1            | 4             | 3            | 3              | 3             | 3             | 2            | CoV-2                         |                                |                                |                                 |                                |
| Q86V58            | Protein Hook homolog 3                                                                    | HOOK3          | 1                  | 5               | 3                      | 0                | 3             | 1            | 3             | 3            | 3              | 3             | 3             | 3            | CoV-2                         |                                |                                |                                 |                                |
| Q969E2            | Secretory carrier-associated membrane                                                     | SCAMP4         | 1                  | 2               | 3                      | 0                | 0             | 1            | 3             | 2            | 2              | 1             | 0             | 0            | CoV-2                         |                                |                                |                                 |                                |
| Q96EY1            | DnaJ homolog subfamily A member 3,                                                        | DNAJA3         | 1                  | 2               | 3                      | 0                | 1             | 0            | 1             | 1            | 2              | 0             | 1             | 1            | CoV-2                         |                                |                                |                                 |                                |
| Q96FX7            | tRNA (adenine(58)-N(1))-methyltransferase catalytic subunit TRMT61A                       | TRMT61A        | 1                  | 3               | 3                      | 0                | 2             | 1            | 2             | 0            | 0              | 0             | 0             | 1            | CoV-2                         |                                |                                |                                 |                                |
| Q9H6T0            | Epithelial splicing regulatory protein 2                                                  | ESRP2          | 1                  | 3               | 3                      | 0                | 1             | 1            | 1             | 0            | 2              | 2             | 1             | 1            | CoV-2                         |                                |                                |                                 |                                |
| P01009            | Alpha-1-antitrypsin;Short peptide from AAT                                                | SERPINA1       | 1                  | 3               | 0                      | 4                | 0             | 4            | 0             | 4            | 0              | 4             | 0             | 2            | mock                          | mock                           | mock                           | mock                            |                                |
| O15230            | Laminin subunit alpha-5                                                                   | LAMA5          | 1                  | 8               | 0                      | 3                | 0             | 3            | 0             | 2            | 2              | 3             | 1             | 2            | mock                          | mock                           |                                |                                 |                                |
| Q96EY5            | Multivesicular body subunit 12A                                                           | MVB12A         | 1                  | 5               | 0                      | 4                | 1             | 3            | 0             | 2            | 0              | 3             | 1             | 2            | mock                          |                                |                                | mock                            |                                |
| Q9UBX7            | Kallikrein-11;Kallikrein-11 inactive chain 1;Kallikrein-11 inactive chain 2               | KLK11          | 1                  | 3               | 0                      | 4                | 0             | 2            | 0             | 2            | 0              | 3             | 0             | 2            | mock                          |                                |                                | mock                            |                                |
| P33991            | DNA replication licensing factor MCM4                                                     | MCM4           | 1                  | 3               | 0                      | 3                | 0             | 2            | 0             | 1            | 0              | 2             | 0             | 3            | mock                          |                                |                                |                                 | mock                           |
| P01011            | Alpha-1-antichymotrypsin;Alpha-1-                                                         | SERPINA3       | 1                  | 6               | 0                      | 3                | 1             | 3            | 1             | 2            | 1              | 2             | 1             | 1            | mock                          |                                |                                |                                 |                                |
| P02751            | Fibronectin;Anastellin;Ugl-Y1;Ugl-Y2;Ugl-Y3                                               | FN1            | 1                  | 13              | 0                      | 3                | 0             | 2            | 1             | 2            | 1              | 1             | 1             | 2            | mock                          |                                |                                |                                 |                                |
| P08118            | Beta-microseminoprotein                                                                   | MSMB           | 1                  | 2               | 0                      | 3                | 0             | 2            | 1             | 1            | 0              | 1             | 0             | 2            | mock                          |                                |                                |                                 |                                |
| Q8NFI9            | Bardet-Biedl syndrome 1 protein                                                           | BBS1           | 1                  | 4               | 0                      | 3                | 2             | 2            | 2             | 4            | 2              | 4             | 2             | 3            | mock                          |                                |                                |                                 |                                |
| Q16222            | UDP-N-acetylhexosamine pyrophosphorylase;UDP-N-acetylgalactosamine pyrophosphorylase;UDP- | UAP1           | 1                  | 3               | 1                      | 0                | 3             | 0            | 0             | 3            | 3              | 0             | 1             | 2            |                               | CoV-2                          | mock                           | CoV-2                           |                                |
| P52434            | DNA-directed RNA polymerases I, II, and III                                               | POLR2H         | 1                  | 4               | 2                      | 2                | 3             | 0            | 0             | 2            | 1              | 1             | 3             | 0            |                               | CoV-2                          |                                |                                 | CoV-2                          |
| O60888            | Protein CutA                                                                              | CUTA           | 1                  | 3               | 3                      | 2                | 3             | 0            | 3             | 2            | 1              | 2             | 0             | 2            |                               | CoV-2                          |                                |                                 |                                |
| Q15650            | Activating signal cointegrator 1                                                          | TRIP4          | 1                  | 4               | 2                      | 2                | 3             | 0            | 3             | 2            | 2              | 2             | 2             | 1            |                               | CoV-2                          |                                |                                 |                                |
| Q16740            | ATP-dependent Clp protease proteolytic                                                    | CLPP           | 1                  | 1               | 4                      | 2                | 3             | 0            | 3             | 3            | 2              | 1             | 3             | 1            |                               | CoV-2                          |                                |                                 |                                |
| Q96PU5;P46934     | E3 ubiquitin-protein ligase NEDD4-like                                                    | NEDD4L         | 2                  | 9               | 3                      | 2                | 3             | 0            | 2             | 1            | 2              | 0             | 3             | 3            |                               | CoV-2                          |                                |                                 |                                |
| Q99567            | Nuclear pore complex protein Nup88                                                        | NUP88          | 1                  | 5               | 2                      | 0                | 3             | 0            | 1             | 0            | 1              | 1             | 1             | 0            |                               | CoV-2                          |                                |                                 |                                |
| Q9BRG2            | SH2 domain-containing protein 3A                                                          | SH2D3A         | 1                  | 9               | 2                      | 0                | 3             | 0            | 2             | 1            | 0              | 1             | 1             | 0            |                               | CoV-2                          |                                |                                 |                                |
| Q9BU89            | Deoxyhypusine hydroxylase                                                                 | DOHH           | 1                  | 6               | 2                      | 2                | 3             | 0            | 2             | 2            | 2              | 0             | 1             | 2            |                               | CoV-2                          |                                |                                 |                                |
| Q9NPC4            | Lactosylceramide 4-alpha-                                                                 | A4GALT         | 1                  | 5               | 1                      | 3                | 0             | 3            | 0             | 3            | 1              | 4             | 4             | 2            |                               | mock                           | mock                           |                                 |                                |
| P05186            | Alkaline phosphatase, tissue-nonspecific                                                  | ALPL           | 1                  | 4               | 0                      | 1                | 0             | 3            | 0             | 2            | 0              | 3             | 1             | 3            |                               | mock                           |                                | mock                            |                                |
| P61619            | Protein transport protein Sec61 subunit alpha                                             | SEC61A1        | 1                  | 1               | 3                      | 3                | 0             | 3            | 2             | 1            | 2              | 1             | 3             | 0            |                               | mock                           |                                |                                 | CoV-2                          |
| Q10472;Q8IUC8     | Polypeptide N-acetylgalactosaminyltransferase 1;Polypeptide N-                            | GALNT1;GALNT13 | 2                  | 3               | 0                      | 2                | 0             | 3            | 0             | 0            | 0              | 1             | 0             | 3            |                               | mock                           |                                |                                 | mock                           |
| A6NHR9            | Structural maintenance of chromosomes flexible hinge domain-containing protein 1          | SMCHD1         | 1                  | 6               | 2                      | 2                | 0             | 3            | 2             | 0            | 0              | 0             | 2             | 1            |                               | mock                           |                                |                                 |                                |
| O43823            | A-kinase anchor protein 8                                                                 | AKAP8          | 1                  | 4               | 0                      | 1                | 0             | 3            | 3             | 1            | 3              | 2             | 4             | 3            |                               | mock                           |                                |                                 |                                |
| O60240            | Perilipin-1                                                                               | PLIN1          | 1                  | 2               | 2                      | 2                | 0             | 3            | 1             | 1            | 2              | 4             | 2             | 2            |                               | mock                           |                                |                                 |                                |
| P48378;P22670     | DNA-binding protein RFX2                                                                  | RFX2           | 2                  | 3               | 1                      | 1                | 0             | 3            | 1             | 0            | 0              | 0             | 1             | 0            |                               | mock                           |                                |                                 |                                |
| Q14696            | LDLR chaperone MESD                                                                       | MESDC2         | 1                  | 3               | 0                      | 2                | 0             | 3            | 1             | 2            | 2              | 2             | 1             | 3            |                               | mock                           |                                |                                 |                                |
| Q5VW32            | BRO1 domain-containing protein BROX                                                       | BROX           | 1                  | 3               | 1                      | 3                | 0             | 4            | 2             | 4            | 1              | 2             | 1             | 2            |                               | mock                           |                                |                                 |                                |
| Q9UBI6            | Guanine nucleotide-binding protein G(I)/G(S)/G(O) subunit gamma-12                        | GNG12          | 1                  | 3               | 1                      | 2                | 0             | 3            | 4             | 2            | 2              | 3             | 4             | 3            |                               | mock                           |                                |                                 |                                |
| O75152;A0A1B0GTU1 | Zinc finger CCCH domain-containing protein 11A                                            | ZC3H11A        | 2                  | 2               | 0                      | 0                | 1             | 1            | 3             | 0            | 1              | 1             | 1             | 1            |                               |                                | CoV-2                          |                                 |                                |
| P21127;Q9UQ88     | Cyclin-dependent kinase 11B;Cyclin-                                                       | CDK11B;CDK11   | 2                  | 7               | 0                      | 0                | 1             | 1            | 3             | 0            | 2              | 2             | 3             | 2            |                               |                                | CoV-2                          |                                 |                                |
| P49903            | Selenide, water dikinase 1                                                                | SEPH51         | 1                  | 6               | 1                      | 0                | 2             | 1            | 3             | 0            | 3              | 1             | 2             | 1            |                               |                                | CoV-2                          |                                 |                                |
| Q9UG63            | ATP-binding cassette sub-family F member 2                                                | ABCF2          | 1                  | 2               | 0                      | 0                | 1             | 0            | 3             | 0            | 2              | 1             | 1             | 0            |                               |                                | CoV-2                          |                                 |                                |
| Q687X5            | Metalloreductase STEAP4                                                                   | STEAP4         | 1                  | 5               | 1                      | 4                | 1             | 3            | 0             | 3            | 0              | 4             | 0             | 3            |                               |                                | mock                           | mock                            | mock                           |
| P07902            | Galactose-1-phosphate uridylyltransferase                                                 | GALT           | 1                  | 2               | 1                      | 1                | 0             | 1            | 0             | 3            | 1              | 1             | 1             | 2            |                               |                                | mock                           |                                 |                                |
| P43234            | Cathepsin O                                                                               | CTSO           | 1                  | 4               | 1                      | 4                | 1             | 4            | 0             | 4            | 1              | 4             | 0             | 2            |                               |                                | mock                           |                                 |                                |
| Q96IX5            | Up-regulated during skeletal muscle growth                                                | USMG5          | 1                  | 2               | 4                      | 2                | 2             | 0            | 3             | 3            | 2              | 3             | 3             | 3            |                               |                                | mock                           |                                 |                                |

|               |                                                                                                                  |                  |   |   |   |   |   |   |   |   |   |   |   |   |  |  |      |       |
|---------------|------------------------------------------------------------------------------------------------------------------|------------------|---|---|---|---|---|---|---|---|---|---|---|---|--|--|------|-------|
| Q9H1C7        | Cysteine-rich and transmembrane domain-                                                                          | CYSTM1           | 1 | 1 | 1 | 0 | 0 | 1 | 0 | 3 | 0 | 1 | 0 | 0 |  |  | mock |       |
| Q9H4K1        | RIB43A-like with coiled-coils protein 2                                                                          | RIBC2            | 1 | 6 | 3 | 3 | 0 | 2 | 0 | 4 | 2 | 1 | 3 | 2 |  |  | mock |       |
| O00471        | Exocyst complex component 5                                                                                      | EXOC5            | 1 | 3 | 3 | 3 | 4 | 2 | 1 | 2 | 3 | 0 | 2 | 4 |  |  |      | CoV-2 |
| P17936        | Insulin-like growth factor-binding protein 3                                                                     | IGFBP3           | 1 | 4 | 3 | 1 | 3 | 1 | 2 | 1 | 3 | 0 | 2 | 1 |  |  |      | CoV-2 |
| P27144        | Adenylate kinase 4, mitochondrial                                                                                | AK4              | 1 | 4 | 2 | 4 | 3 | 2 | 3 | 3 | 3 | 0 | 3 | 2 |  |  |      | CoV-2 |
| P33527        | Multidrug resistance-associated protein 1                                                                        | ABCC1            | 1 | 3 | 3 | 2 | 2 | 0 | 2 | 1 | 3 | 0 | 1 | 0 |  |  |      | CoV-2 |
| P51178        | 1-phosphatidylinositol 4,5-bisphosphate                                                                          | PLCD1            | 1 | 6 | 3 | 3 | 1 | 0 | 1 | 1 | 3 | 0 | 1 | 1 |  |  |      | CoV-2 |
| P82921        | 28S ribosomal protein S21, mitochondrial                                                                         | MRPS21           | 1 | 3 | 2 | 2 | 2 | 0 | 1 | 3 | 0 | 1 | 1 | 1 |  |  |      | CoV-2 |
| Q15031        | Probable leucine--tRNA ligase, mitochondrial                                                                     | LARS2            | 1 | 5 | 3 | 1 | 1 | 1 | 1 | 0 | 3 | 0 | 1 | 1 |  |  |      | CoV-2 |
| Q5T653        | 39S ribosomal protein L2, mitochondrial                                                                          | MRPL2            | 1 | 3 | 3 | 2 | 2 | 3 | 2 | 1 | 3 | 0 | 1 | 3 |  |  |      | CoV-2 |
| Q96A72        | Protein mago nashi homolog 2                                                                                     | MAGOHB           | 1 | 1 | 2 | 4 | 4 | 2 | 3 | 4 | 3 | 0 | 2 | 4 |  |  |      | CoV-2 |
| Q96HN2        | Putative adenosylhomocysteinase 3                                                                                | AHCYL2           | 1 | 3 | 0 | 1 | 1 | 0 | 3 | 1 | 3 | 0 | 2 | 1 |  |  |      | CoV-2 |
| Q96P16        | Regulation of nuclear pre-mRNA domain-                                                                           | RPRD1A           | 1 | 4 | 3 | 1 | 2 | 2 | 2 | 2 | 3 | 0 | 2 | 2 |  |  |      | CoV-2 |
| Q96PW9        | Dehydrogenase/reductase SDR family                                                                               | DHRS9            | 1 | 4 | 2 | 2 | 3 | 2 | 3 | 2 | 3 | 0 | 2 | 2 |  |  |      | CoV-2 |
| Q9NPF4        | Probable tRNA N6-adenosine                                                                                       | OSGEP            | 1 | 7 | 2 | 3 | 2 | 1 | 4 | 4 | 4 | 0 | 3 | 3 |  |  |      | CoV-2 |
| Q9NRD5        | PRKA-binding protein                                                                                             | PICK1            | 1 | 2 | 3 | 1 | 1 | 2 | 0 | 1 | 3 | 0 | 3 | 1 |  |  |      | CoV-2 |
| Q9UBP6        | tRNA (guanine-N(7)-)-methyltransferase                                                                           | METTL1           | 1 | 3 | 1 | 1 | 2 | 2 | 0 | 0 | 4 | 0 | 1 | 0 |  |  |      | CoV-2 |
| Q9UHD2        | Serine/threonine-protein kinase TBK1                                                                             | TBK1             | 1 | 3 | 2 | 0 | 0 | 2 | 2 | 2 | 3 | 0 | 2 | 1 |  |  |      | CoV-2 |
| Q9UPM9        | B9 domain-containing protein 1                                                                                   | B9D1             | 1 | 2 | 1 | 1 | 0 | 0 | 1 | 1 | 3 | 0 | 2 | 0 |  |  |      | CoV-2 |
| Q9Y3B7        | 39S ribosomal protein L11, mitochondrial                                                                         | MRPL11           | 1 | 4 | 4 | 2 | 2 | 1 | 2 | 0 | 3 | 0 | 2 | 1 |  |  |      | CoV-2 |
| O43447        | Peptidyl-prolyl cis-trans isomerase H                                                                            | PPIH             | 1 | 4 | 0 | 1 | 0 | 1 | 1 | 2 | 0 | 3 | 0 | 1 |  |  |      | mock  |
| P19021        | Peptidyl-glycine alpha-amidating monooxygenase;Peptidylglycine alpha-hydroxylating monooxygenase;Peptidyl-alpha- | PAM              | 1 | 4 | 1 | 2 | 0 | 2 | 0 | 1 | 0 | 3 | 0 | 0 |  |  |      | mock  |
| P26583        | High mobility group protein B2                                                                                   | HMGB2            | 1 | 2 | 2 | 3 | 1 | 1 | 2 | 3 | 0 | 4 | 3 | 2 |  |  |      | mock  |
| P28300        | Protein-lysine 6-oxidase                                                                                         | LOX              | 1 | 2 | 0 | 0 | 0 | 2 | 0 | 0 | 0 | 3 | 0 | 1 |  |  |      | mock  |
| P78424        | POU domain, class 6, transcription factor 2                                                                      | POU6F2           | 1 | 2 | 0 | 0 | 0 | 0 | 1 | 4 | 0 | 3 | 1 | 1 |  |  |      | mock  |
| Q06587        | E3 ubiquitin-protein ligase RING1                                                                                | RING1            | 1 | 3 | 3 | 2 | 3 | 3 | 4 | 3 | 0 | 3 | 2 | 4 |  |  |      | mock  |
| Q16555        | Dihydropyrimidinase-related protein 2                                                                            | DPYSL2           | 1 | 5 | 4 | 4 | 2 | 3 | 4 | 3 | 0 | 3 | 1 | 0 |  |  |      | mock  |
| Q56VL3        | OClA domain-containing protein 2                                                                                 | OClAD2           | 1 | 3 | 4 | 4 | 3 | 3 | 1 | 2 | 0 | 4 | 1 | 1 |  |  |      | mock  |
| Q9BUR4        | Telomerase Cajal body protein 1                                                                                  | WRAP53           | 1 | 3 | 0 | 1 | 0 | 1 | 0 | 1 | 0 | 3 | 1 | 1 |  |  |      | mock  |
| Q9P2H3        | Intraflagellar transport protein 80 homolog                                                                      | IFT80            | 1 | 6 | 2 | 2 | 1 | 1 | 1 | 1 | 0 | 3 | 1 | 3 |  |  |      | mock  |
| Q9Y6D6;Q9Y6D5 | Brefeldin A-inhibited guanine nucleotide-exchange protein 1;Brefeldin A-inhibited                                | ARFGEF1;ARFG EF2 | 2 | 4 | 0 | 1 | 1 | 0 | 2 | 0 | 0 | 3 | 0 | 2 |  |  |      | mock  |
| P35613        | Basigin                                                                                                          | BSG              | 1 | 1 | 1 | 1 | 1 | 0 | 2 | 0 | 2 | 1 | 3 | 0 |  |  |      | CoV-2 |
| Q13868        | Exosome complex component RRP4                                                                                   | EXOSC2           | 1 | 3 | 2 | 1 | 1 | 0 | 0 | 1 | 1 | 1 | 3 | 0 |  |  |      | CoV-2 |
| Q86TU7        | Histone-lysine N-methyltransferase setd3                                                                         | SETD3            | 1 | 3 | 4 | 3 | 3 | 2 | 2 | 2 | 3 | 2 | 3 | 0 |  |  |      | CoV-2 |
| Q96A35        | 39S ribosomal protein L24, mitochondrial                                                                         | MRPL24           | 1 | 3 | 1 | 1 | 1 | 0 | 2 | 1 | 1 | 1 | 3 | 0 |  |  |      | CoV-2 |
| Q9BRX8        | Redox-regulatory protein FAM213A                                                                                 | FAM213A          | 1 | 5 | 4 | 3 | 2 | 4 | 2 | 2 | 1 | 1 | 3 | 0 |  |  |      | CoV-2 |
| Q9GZY8        | Mitochondrial fission factor                                                                                     | MFF              | 1 | 5 | 2 | 3 | 3 | 2 | 1 | 0 | 2 | 0 | 4 | 0 |  |  |      | CoV-2 |
| O75882        | Attractin                                                                                                        | ATRN             | 1 | 8 | 1 | 4 | 1 | 4 | 1 | 4 | 2 | 4 | 0 | 4 |  |  |      | mock  |
| P18065        | Insulin-like growth factor-binding protein 2                                                                     | IGFBP2           | 1 | 6 | 1 | 2 | 1 | 2 | 2 | 2 | 1 | 3 | 0 | 3 |  |  |      | mock  |
| Q14508        | WAP four-disulfide core domain protein 2                                                                         | WFDC2            | 1 | 2 | 1 | 1 | 1 | 0 | 2 | 1 | 3 | 0 | 3 |   |  |  |      | mock  |
| Q96DA0        | Zymogen granule protein 16 homolog B                                                                             | ZG16B            | 1 | 3 | 1 | 2 | 1 | 2 | 0 | 2 | 1 | 2 | 0 | 3 |  |  |      | mock  |
| Q9UID3        | Vacuolar protein sorting-associated protein 51                                                                   | VPS51            | 1 | 5 | 2 | 0 | 0 | 1 | 2 | 3 | 1 | 3 | 0 | 3 |  |  |      | mock  |
| Q9ULX6        | A-kinase anchor protein 8-like                                                                                   | AKAP8L           | 1 | 3 | 2 | 0 | 1 | 1 | 2 | 3 | 2 | 1 | 0 | 4 |  |  |      | mock  |



## Supplementary Table 3\_STRING Enriched GO-Biological Processes

| Table No. | Content                                       |
|-----------|-----------------------------------------------|
| 1         | T = 0 h, IFN $\alpha$ 5 / Untreated           |
| 2         | T = 0 h, IFN $\alpha$ 7 / Untreated           |
| 3         | T = 0 h, IFN $\alpha$ 16 / Untreated          |
| 4         | T = 0 h, IFN $\lambda$ 3 / Untreated          |
| 5         | T = 72 h (CoV-2), IFN $\alpha$ 5 / Untreated  |
| 6         | T = 72 h (CoV-2), IFN $\alpha$ 7 / Untreated  |
| 7         | T = 72 h (CoV-2), IFN $\alpha$ 16 / Untreated |
| 8         | T = 72 h (CoV-2), IFN $\lambda$ 3 / Untreated |
| 9         | T = 72 h (mock) IFN $\alpha$ 5 / Untreated    |
| 10        | T = 72 h (mock) IFN $\alpha$ 7 / Untreated    |
| 11        | T = 72 h (mock) IFN $\alpha$ 16 / Untreated   |
| 12        | T = 72 h (mock) IFN $\lambda$ 3 / Untreated   |
| 13        | T = 72 h, Untreated: CoV-2 / mock             |
| 14        | T = 72 h, IFN $\alpha$ 5: CoV-2 / mock        |
| 15        | T = 72 h, IFN $\alpha$ 7: CoV-2 / mock        |
| 16        | T = 72 h, IFN $\alpha$ 16: CoV-2 / mock       |
| 17        | T = 72 h, IFN $\lambda$ 3: CoV-2 / mock       |

T = 0 h, IFN $\alpha$ 5  
/ Untreated

| #Term ID   | Term Description                              | Observed Gene Count | Background Gene Count | Strength | False Discovery Rate | Matching Proteins in Your Input (IDs)                                                                                                                                                                                                                                                                                                                                                   | Matching Proteins in Your Input (Labels)                                                               |
|------------|-----------------------------------------------|---------------------|-----------------------|----------|----------------------|-----------------------------------------------------------------------------------------------------------------------------------------------------------------------------------------------------------------------------------------------------------------------------------------------------------------------------------------------------------------------------------------|--------------------------------------------------------------------------------------------------------|
| GO:0060337 | type I interferon signaling pathway           | 10                  | 65                    | 1.8      | 3.06E-12             | 9606.ENSP00000257570,9606.ENSP00000306565,9606.ENSP0000333657,9606.ENSP00000343023,9606.ENSP00000354394,9606.ENSP00000360891,9606.ENSP00000368699,9606.ENSP0000381601,9606.ENSP00000395590,9606.ENSP00000399168                                                                                                                                                                         | OASL,ISG20,MX2,SP100,STAT1,IFIT2,ISG15,MX1,IFI35,HLA-B                                                 |
| GO:0051607 | defense response to virus                     | 11                  | 181                   | 1.39     | 3.58E-10             | 9606.ENSP00000242351,9606.ENSP00000257570,9606.ENSP0000268058,9606.ENSP00000306565,9606.ENSP00000333657,9606.ENSP00000354394,9606.ENSP00000359787,9606.ENSP00000360891,9606.ENSP00000368699,9606.ENSP00000369213,9606.ENSP00000381601                                                                                                                                                   | ZC3HAV1,OASL,PML,ISG20,MX2,STAT1,IFI44L,IFIT2,ISG15,DDX58,MX1                                          |
| GO:0048525 | negative regulation of viral process          | 9                   | 93                    | 1.6      | 8.06E-10             | 9606.ENSP00000242351,9606.ENSP00000257570,9606.ENSP0000268058,9606.ENSP00000306565,9606.ENSP00000325618,9606.ENSP00000343023,9606.ENSP00000354394,9606.ENSP00000368699,9606.ENSP00000381601                                                                                                                                                                                             | ZC3HAV1,OASL,PML,ISG20,PARP10,SP100,STAT1,ISG15,MX1                                                    |
| GO:0045087 | innate immune response                        | 15                  | 676                   | 0.96     | 1.25E-08             | 9606.ENSP00000242351,9606.ENSP00000257570,9606.ENSP0000268058,9606.ENSP00000306565,9606.ENSP00000333657,9606.ENSP00000343023,9606.ENSP00000354394,9606.ENSP00000359490,9606.ENSP00000360891,9606.ENSP00000368699,9606.ENSP00000369213,9606.ENSP00000381601,9606.ENSP00000395590,9606.ENSP00000399168,9606.ENSP00000409279                                                               | ZC3HAV1,OASL,PML,ISG20,MX2,SP100,STAT1,GBP4,IFIT2,ISG15,DDX58,MX1,IFI35,HLA-B,OTUD4                    |
| GO:0043901 | negative regulation of multi-organism process | 10                  | 212                   | 1.28     | 2.32E-08             | 9606.ENSP00000242351,9606.ENSP00000257570,9606.ENSP0000268058,9606.ENSP00000306565,9606.ENSP00000325618,9606.ENSP00000343023,9606.ENSP00000354394,9606.ENSP00000368699,9606.ENSP00000381601,9606.ENSP00000399168                                                                                                                                                                        | ZC3HAV1,OASL,PML,ISG20,PARP10,SP100,STAT1,ISG15,MX1,HLA-B                                              |
| GO:0098542 | defense response to other organism            | 16                  | 859                   | 0.88     | 2.32E-08             | 9606.ENSP00000242351,9606.ENSP00000257570,9606.ENSP0000268058,9606.ENSP00000306565,9606.ENSP00000333657,9606.ENSP00000343023,9606.ENSP00000354394,9606.ENSP00000359787,9606.ENSP00000360891,9606.ENSP00000368699,9606.ENSP00000369213,9606.ENSP00000381601,9606.ENSP00000395590,9606.ENSP00000399168,9606.ENSP00000409279                                                               | ZC3HAV1,OASL,PML,ISG20,MX2,SP100,STAT1,GBP4,IFI44L,IFIT2,ISG15,DDX58,MX1,IFI35,HLA-B,OTUD4             |
| GO:0006952 | defense response                              | 18                  | 1234                  | 0.77     | 4.69E-08             | 9606.ENSP00000242351,9606.ENSP00000249066,9606.ENSP0000257570,9606.ENSP0000268058,9606.ENSP00000306565,9606.ENSP00000333657,9606.ENSP00000343023,9606.ENSP00000354394,9606.ENSP00000359490,9606.ENSP00000359787,9606.ENSP00000360891,9606.ENSP00000368699,9606.ENSP00000369213,9606.ENSP00000376793,9606.ENSP00000381601,9606.ENSP00000395590,9606.ENSP00000399168,9606.ENSP00000409279 | ZC3HAV1,APOL2,OASL,PML,ISG20,MX2,SP100,STAT1,GBP4,IFI44L,IFIT2,ISG15,DDX58,GIG25,MX1,IFI35,HLA-B,OTUD4 |

|            |                                                 |    |      |      |          |                                                                                                                                                                                                                                                                                                                                                                                                                                  |                                                                                                                    |
|------------|-------------------------------------------------|----|------|------|----------|----------------------------------------------------------------------------------------------------------------------------------------------------------------------------------------------------------------------------------------------------------------------------------------------------------------------------------------------------------------------------------------------------------------------------------|--------------------------------------------------------------------------------------------------------------------|
| GO:0051707 | response to other organism                      | 17 | 1173 | 0.77 | 1.57E-07 | 9606.ENSP00000242351,9606.ENSP00000257570,9606.ENSP0000264346,9606.ENSP0000268058,9606.ENSP00000306565,9606.ENSP00000333657,9606.ENSP00000343023,9606.ENSP00000354394,9606.ENSP00000359490,9606.ENSP00000359787,9606.ENSP00000360891,9606.ENSP00000368699,9606.ENSP00000369213,9606.ENSP00000381601,9606.ENSP00000395590,9606.ENSP00000399168,9606.ENSP00000409279                                                               | ZC3HAV1,OASL,HERC6,PML,ISG20,MX2,SP100,STAT1,GBP4,IFI44L,IFIT2,ISG15,DDX58,MX1,IFI35,HLA-B,OTUD4                   |
| GO:1903901 | negative regulation of viral life cycle         | 7  | 77   | 1.57 | 1.57E-07 | 9606.ENSP00000242351,9606.ENSP00000257570,9606.ENSP0000268058,9606.ENSP00000306565,9606.ENSP00000325618,9606.ENSP00000368699,9606.ENSP00000381601                                                                                                                                                                                                                                                                                | ZC3HAV1,OASL,PML,ISG20,PARP10,ISG15,MX1                                                                            |
| GO:0002252 | immune effector process                         | 15 | 927  | 0.82 | 3.17E-07 | 9606.ENSP00000242351,9606.ENSP00000257570,9606.ENSP0000265016,9606.ENSP0000268058,9606.ENSP00000306565,9606.ENSP00000333657,9606.ENSP00000354394,9606.ENSP00000359787,9606.ENSP00000360891,9606.ENSP00000366032,9606.ENSP00000368699,9606.ENSP00000369213,9606.ENSP00000376793,9606.ENSP00000381601,9606.ENSP00000399168                                                                                                         | ZC3HAV1,OASL,BST1,PML,ISG20,MX2,STAT1,IFI44L,IFIT2,COMMD3,ISG15,DDX58,GIG25,MX1,HLA-B                              |
| GO:0045071 | negative regulation of viral genome replication | 6  | 52   | 1.67 | 4.65E-07 | 9606.ENSP00000242351,9606.ENSP00000257570,9606.ENSP00000306565,9606.ENSP00000325618,9606.ENSP00000368699,9606.ENSP00000381601                                                                                                                                                                                                                                                                                                    | ZC3HAV1,OASL,ISG20,PARP10,ISG15,MX1                                                                                |
| GO:0006955 | immune response                                 | 18 | 1560 | 0.67 | 9.85E-07 | 9606.ENSP00000242351,9606.ENSP00000257570,9606.ENSP0000265016,9606.ENSP0000268058,9606.ENSP00000306565,9606.ENSP00000333657,9606.ENSP00000343023,9606.ENSP00000354394,9606.ENSP00000359490,9606.ENSP00000360891,9606.ENSP00000366032,9606.ENSP00000368699,9606.ENSP00000369213,9606.ENSP00000376793,9606.ENSP00000381601,9606.ENSP00000395590,9606.ENSP00000399168,9606.ENSP00000409279                                          | ZC3HAV1,OASL,BST1,PML,ISG20,MX2,SP100,STAT1,GBP4,IFI44L,IFIT2,COMMD3,ISG15,DDX58,GIG25,MX1,IFI35,HLA-B,OTUD4       |
| GO:0019221 | cytokine-mediated signaling pathway             | 12 | 655  | 0.87 | 3.48E-06 | 9606.ENSP00000257570,9606.ENSP00000268058,9606.ENSP00000306565,9606.ENSP00000333657,9606.ENSP00000343023,9606.ENSP00000354394,9606.ENSP00000360891,9606.ENSP00000368699,9606.ENSP00000381601,9606.ENSP00000395590,9606.ENSP00000399168,9606.ENSP00000446252                                                                                                                                                                      | OASL,PML,ISG20,MX2,SP100,STAT1,IFIT2,ISG15,MX1,IFI35,HLA-B,SOD2                                                    |
| GO:0043900 | regulation of multi-organism process            | 12 | 653  | 0.87 | 3.48E-06 | 9606.ENSP00000242351,9606.ENSP00000257570,9606.ENSP0000268058,9606.ENSP00000306565,9606.ENSP00000325618,9606.ENSP00000343023,9606.ENSP00000354394,9606.ENSP00000368699,9606.ENSP00000369213,9606.ENSP00000381601,9606.ENSP00000399168,9606.ENSP00000409279                                                                                                                                                                       | ZC3HAV1,OASL,PML,ISG20,PARP10,SP100,STAT1,ISG15,DDX58,MX1,HLA-B,OTUD4                                              |
| GO:0002376 | immune system process                           | 20 | 2370 | 0.54 | 1.63E-05 | 9606.ENSP00000242351,9606.ENSP00000257570,9606.ENSP0000264346,9606.ENSP0000265016,9606.ENSP0000268058,9606.ENSP00000306565,9606.ENSP00000333657,9606.ENSP00000343023,9606.ENSP00000354394,9606.ENSP00000359490,9606.ENSP00000359787,9606.ENSP00000360891,9606.ENSP00000366032,9606.ENSP00000368699,9606.ENSP00000369213,9606.ENSP00000376793,9606.ENSP00000381601,9606.ENSP00000395590,9606.ENSP00000399168,9606.ENSP00000409279 | ZC3HAV1,OASL,HERC6,BST1,PML,ISG20,MX2,SP100,STAT1,GBP4,IFI44L,IFIT2,COMMD3,ISG15,DDX58,GIG25,MX1,IFI35,HLA-B,OTUD4 |

|            |                                                                         |    |      |      |          |                                                                                                                                                                                                                                                                                                                                                                                                                                    |                                                                                                                    |
|------------|-------------------------------------------------------------------------|----|------|------|----------|------------------------------------------------------------------------------------------------------------------------------------------------------------------------------------------------------------------------------------------------------------------------------------------------------------------------------------------------------------------------------------------------------------------------------------|--------------------------------------------------------------------------------------------------------------------|
| GO:0071345 | cellular response to cytokine stimulus                                  | 13 | 953  | 0.75 | 2.10E-05 | 9606.ENSP00000257570,9606.ENSP00000268058,9606.ENSP0000306565,9606.ENSP00000333657,9606.ENSP00000343023,9606.ENSP00000354394,9606.ENSP00000359490,9606.ENSP0000360891,9606.ENSP00000368699,9606.ENSP00000381601,9606.ENSP00000395590,9606.ENSP00000399168,9606.ENSP0000446252                                                                                                                                                      | OASL,PML,ISG20,MX2,SP100,STAT1,GBP4,IFIT2,ISG15,MX1,IFI35,HLA-B,SOD2                                               |
| GO:0060333 | interferon-gamma-mediated signaling pathway                             | 5  | 69   | 1.47 | 5.46E-05 | 9606.ENSP00000257570,9606.ENSP00000268058,9606.ENSP0000343023,9606.ENSP00000354394,9606.ENSP00000399168                                                                                                                                                                                                                                                                                                                            | OASL,PML,SP100,STAT1,HLA-B                                                                                         |
| GO:0009605 | response to external stimulus                                           | 18 | 2152 | 0.53 | 8.33E-05 | 9606.ENSP00000242351,9606.ENSP00000257570,9606.ENSP0000264346,9606.ENSP00000268058,9606.ENSP00000306565,9606.ENSP00000333657,9606.ENSP00000343023,9606.ENSP00000354394,9606.ENSP00000359490,9606.ENSP00000359787,9606.ENSP00000360891,9606.ENSP00000368699,9606.ENSP00000369213,9606.ENSP00000379038,9606.ENSP00000381601,9606.ENSP00000395590,9606.ENSP00000399168,9606.ENSP0000409279                                            | ZC3HAV1,OASL,HERC6,PML,ISG20,MX2,SP100,STAT1,GBP4,IFI44L,IFIT2,ISG15,DDX58,TYMP,MX1,IFI35,HLA-B,OTUD4              |
| GO:0071346 | cellular response to interferon-gamma                                   | 6  | 155  | 1.2  | 0.00013  | 9606.ENSP00000257570,9606.ENSP00000268058,9606.ENSP0000343023,9606.ENSP00000354394,9606.ENSP00000359490,9606.ENSP00000399168                                                                                                                                                                                                                                                                                                       | OASL,PML,SP100,STAT1,GBP4,HLA-B                                                                                    |
| GO:0051704 | multi-organism process                                                  | 19 | 2514 | 0.49 | 0.00016  | 9606.ENSP00000242351,9606.ENSP00000249066,9606.ENSP0000257570,9606.ENSP00000261700,9606.ENSP00000264346,9606.ENSP00000268058,9606.ENSP00000306565,9606.ENSP00000333657,9606.ENSP00000343023,9606.ENSP00000354394,9606.ENSP00000359490,9606.ENSP00000359787,9606.ENSP00000360891,9606.ENSP00000368699,9606.ENSP00000369213,9606.ENSP00000381601,9606.ENSP00000395590,9606.ENSP00000399168,9606.ENSP00000409279                      | ZC3HAV1,APOL2,OASL,C14orf166,HERC6,PML,ISG20,MX2,SP100,STAT1,GBP4,IFI44L,IFIT2,ISG15,DDX58,MX1,IFI35,HLA-B,OTUD4   |
| GO:0032727 | positive regulation of interferon-alpha production                      | 3  | 23   | 1.73 | 0.0015   | 9606.ENSP00000242351,9606.ENSP00000354394,9606.ENSP0000369213                                                                                                                                                                                                                                                                                                                                                                      | ZC3HAV1,STAT1,DDX58                                                                                                |
| GO:0050688 | regulation of defense response to virus                                 | 4  | 71   | 1.36 | 0.0015   | 9606.ENSP00000242351,9606.ENSP00000268058,9606.ENSP0000354394,9606.ENSP00000369213                                                                                                                                                                                                                                                                                                                                                 | ZC3HAV1,PML,STAT1,DDX58                                                                                            |
| GO:0006950 | response to stress                                                      | 20 | 3267 | 0.4  | 0.0017   | 9606.ENSP00000242351,9606.ENSP00000249066,9606.ENSP0000257570,9606.ENSP00000268058,9606.ENSP00000306565,9606.ENSP00000326603,9606.ENSP00000333657,9606.ENSP00000343023,9606.ENSP00000354394,9606.ENSP00000359490,9606.ENSP00000359787,9606.ENSP00000360891,9606.ENSP00000368699,9606.ENSP00000369213,9606.ENSP00000376793,9606.ENSP00000381601,9606.ENSP00000395590,9606.ENSP00000399168,9606.ENSP00000409279,9606.ENSP00000446252 | ZC3HAV1,APOL2,OASL,PML,ISG20,SMCHD1,MX2,SP100,STAT1,GBP4,IFI44L,IFIT2,ISG15,DDX58,GIG25,MX1,IFI35,HLA-B,OTUD4,SOD2 |
| GO:0002230 | positive regulation of defense response to virus by host                | 3  | 26   | 1.67 | 0.002    | 9606.ENSP00000268058,9606.ENSP00000354394,9606.ENSP0000369213                                                                                                                                                                                                                                                                                                                                                                      | PML,STAT1,DDX58                                                                                                    |
| GO:0032479 | regulation of type I interferon production                              | 4  | 112  | 1.16 | 0.0071   | 9606.ENSP00000242351,9606.ENSP00000354394,9606.ENSP0000368699,9606.ENSP00000369213                                                                                                                                                                                                                                                                                                                                                 | ZC3HAV1,STAT1,ISG15,DDX58                                                                                          |
| GO:0003374 | dynamin family protein polymerization involved in mitochondrial fission | 2  | 7    | 2.07 | 0.0078   | 9606.ENSP00000333657,9606.ENSP00000381601                                                                                                                                                                                                                                                                                                                                                                                          | MX2,MX1                                                                                                            |

|            |                                                      |    |      |      |        |                                                                                                                                                                                                                                                                                                                                                                                                                                                                                                                                                                                                                                                  |                                                                                                                                                                                  |
|------------|------------------------------------------------------|----|------|------|--------|--------------------------------------------------------------------------------------------------------------------------------------------------------------------------------------------------------------------------------------------------------------------------------------------------------------------------------------------------------------------------------------------------------------------------------------------------------------------------------------------------------------------------------------------------------------------------------------------------------------------------------------------------|----------------------------------------------------------------------------------------------------------------------------------------------------------------------------------|
| GO:0016032 | viral process                                        | 7  | 571  | 0.7  | 0.0172 | 9606.ENSP00000261700,9606.ENSP00000268058,9606.ENSP0000343023,9606.ENSP00000354394,9606.ENSP00000368699,9606.ENSP00000369213,9606.ENSP00000399168                                                                                                                                                                                                                                                                                                                                                                                                                                                                                                | C14orf166,PML,SP100,STAT1,ISG15,DDX58,HLA-B                                                                                                                                      |
| GO:0002831 | regulation of response to biotic stimulus            | 6  | 426  | 0.76 | 0.021  | 9606.ENSP00000242351,9606.ENSP00000268058,9606.ENSP0000354394,9606.ENSP00000369213,9606.ENSP00000399168,9606.ENSP00000409279                                                                                                                                                                                                                                                                                                                                                                                                                                                                                                                     | ZC3HAV1,PML,STAT1,DDX58,HLA-B,OTUD4                                                                                                                                              |
| GO:0071310 | cellular response to organic substance               | 14 | 2219 | 0.41 | 0.0217 | 9606.ENSP00000257570,9606.ENSP00000268058,9606.ENSP0000306565,9606.ENSP00000333657,9606.ENSP00000343023,9606.ENSP00000354394,9606.ENSP00000359490,9606.ENSP0000360891,9606.ENSP00000368699,9606.ENSP00000369213,9606.ENSP00000381601,9606.ENSP00000395590,9606.ENSP0000399168,9606.ENSP00000446252                                                                                                                                                                                                                                                                                                                                               | OASL,PML,ISG20,MX2,SP100,STAT1,GBP4,IFIT2,ISG15,DDX58,MX1,IFI35,HLA-B,SOD2                                                                                                       |
| GO:1901342 | regulation of vasculature development                | 5  | 305  | 0.82 | 0.0298 | 9606.ENSP00000268058,9606.ENSP00000343023,9606.ENSP0000347495,9606.ENSP00000354394,9606.ENSP00000446252                                                                                                                                                                                                                                                                                                                                                                                                                                                                                                                                          | PML,SP100,WARS,STAT1,SOD2                                                                                                                                                        |
| GO:0048384 | retinoic acid receptor signaling pathway             | 2  | 17   | 1.68 | 0.0304 | 9606.ENSP00000268058,9606.ENSP00000343023                                                                                                                                                                                                                                                                                                                                                                                                                                                                                                                                                                                                        | PML,SP100                                                                                                                                                                        |
| GO:0080134 | regulation of response to stress                     | 10 | 1299 | 0.5  | 0.0321 | 9606.ENSP00000242351,9606.ENSP00000265016,9606.ENSP0000268058,9606.ENSP00000354394,9606.ENSP00000367408,9606.ENSP00000369038,9606.ENSP00000369213,9606.ENSP0000399168,9606.ENSP00000409279,9606.ENSP00000446252                                                                                                                                                                                                                                                                                                                                                                                                                                  | ZC3HAV1,BST1,PML,STAT1,CASK,EEF1E1,DDX58,HLA-B,OTUD4,SOD2                                                                                                                        |
| GO:0000266 | mitochondrial fission                                | 2  | 19   | 1.63 | 0.035  | 9606.ENSP00000333657,9606.ENSP00000381601                                                                                                                                                                                                                                                                                                                                                                                                                                                                                                                                                                                                        | MX2,MX1                                                                                                                                                                          |
| GO:0008285 | negative regulation of cell population proliferation | 7  | 669  | 0.63 | 0.035  | 9606.ENSP00000268058,9606.ENSP00000325618,9606.ENSP0000347495,9606.ENSP00000354394,9606.ENSP00000367408,9606.ENSP00000369038,9606.ENSP00000446252                                                                                                                                                                                                                                                                                                                                                                                                                                                                                                | PML,PARP10,WARS,STAT1,CASK,EEF1E1,SOD2                                                                                                                                           |
| GO:0009062 | fatty acid catabolic process                         | 3  | 84   | 1.16 | 0.0356 | 9606.ENSP00000360541,9606.ENSP00000360569,9606.ENSP0000361151                                                                                                                                                                                                                                                                                                                                                                                                                                                                                                                                                                                    | CPT2,SCP2,CEL                                                                                                                                                                    |
| GO:0031347 | regulation of defense response                       | 7  | 676  | 0.63 | 0.0356 | 9606.ENSP00000242351,9606.ENSP00000265016,9606.ENSP0000268058,9606.ENSP00000354394,9606.ENSP00000369213,9606.ENSP00000399168,9606.ENSP00000409279                                                                                                                                                                                                                                                                                                                                                                                                                                                                                                | ZC3HAV1,BST1,PML,STAT1,DDX58,HLA-B,OTUD4                                                                                                                                         |
| GO:0050896 | response to stimulus                                 | 30 | 7824 | 0.19 | 0.0371 | 9606.ENSP00000194214,9606.ENSP00000242351,9606.ENSP00000249066,9606.ENSP00000257570,9606.ENSP00000264346,9606.ENSP00000265016,9606.ENSP00000268058,9606.ENSP0000269886,9606.ENSP00000290291,9606.ENSP00000306565,9606.ENSP00000326603,9606.ENSP00000333657,9606.ENSP0000343023,9606.ENSP00000354394,9606.ENSP00000359490,9606.ENSP00000359787,9606.ENSP00000360891,9606.ENSP0000366032,9606.ENSP00000368699,9606.ENSP00000369213,9606.ENSP00000376793,9606.ENSP00000379038,9606.ENSP0000381601,9606.ENSP00000383402,9606.ENSP00000395590,9606.ENSP00000399168,9606.ENSP00000409279,9606.ENSP0000413218,9606.ENSP00000436901,9606.ENSP00000446252 | HSPB11,ZC3HAV1,APOL2,OASL,HERC6,BST1,PML,SH3GL1,OGFR,ISG20,SMCHD1,MX2,SP100,STAT1,GBP4,IFI44L,IFIT2,COMMD3,ISG15,DDX58,GIG25,TYMP,MX1,PPP4R1,IFI35,HLA-B,OTUD4,FAM213B,DPF2,SOD2 |

|            |                                            |    |      |      |        |                                                                                                                                                                                                                                                                                                                         |                                                                                    |
|------------|--------------------------------------------|----|------|------|--------|-------------------------------------------------------------------------------------------------------------------------------------------------------------------------------------------------------------------------------------------------------------------------------------------------------------------------|------------------------------------------------------------------------------------|
| GO:0070887 | cellular response to chemical stimulus     | 15 | 2672 | 0.36 | 0.0371 | 9606.ENSP00000257570,9606.ENSP00000268058,9606.ENSP0000306565,9606.ENSP00000333657,9606.ENSP00000343023,9606.ENSP00000354394,9606.ENSP00000359490,9606.ENSP0000360891,9606.ENSP00000368699,9606.ENSP00000369213,9606.ENSP00000381601,9606.ENSP00000395590,9606.ENSP0000399168,9606.ENSP00000413218,9606.ENSP00000446252 | OASL,PML,ISG20,MX2,SP100,STAT1,GBP4,IFIT2,ISG15,DDX58,MX1,IFI35,HLA-B,FAM213B,SOD2 |
| GO:0035455 | response to interferon-alpha               | 2  | 22   | 1.57 | 0.0409 | 9606.ENSP00000333657,9606.ENSP00000360891                                                                                                                                                                                                                                                                               | MX2,IFIT2                                                                          |
| GO:0051457 | maintenance of protein location in nucleus | 2  | 22   | 1.57 | 0.0409 | 9606.ENSP00000268058,9606.ENSP00000343023                                                                                                                                                                                                                                                                               | PML,SP100                                                                          |
| GO:0002697 | regulation of immune effector process      | 5  | 362  | 0.75 | 0.0485 | 9606.ENSP00000242351,9606.ENSP00000268058,9606.ENSP0000354394,9606.ENSP00000369213,9606.ENSP00000399168                                                                                                                                                                                                                 | ZC3HAV1,PML,STAT1,DDX58,HLA-B                                                      |
| GO:0006412 | translation                                | 5  | 362  | 0.75 | 0.0485 | 9606.ENSP00000261868,9606.ENSP00000346015,9606.ENSP0000347495,9606.ENSP00000369038,9606.ENSP00000379506                                                                                                                                                                                                                 | EIF3J,RPL27A,WARS,EEF1E1,RPL14                                                     |
| GO:0007166 | cell surface receptor signaling pathway    | 13 | 2198 | 0.38 | 0.0485 | 9606.ENSP00000194214,9606.ENSP00000257570,9606.ENSP0000268058,9606.ENSP00000306565,9606.ENSP00000333657,9606.ENSP00000343023,9606.ENSP00000354394,9606.ENSP0000360891,9606.ENSP00000368699,9606.ENSP00000381601,9606.ENSP00000395590,9606.ENSP00000399168,9606.ENSP0000446252                                           | HSPB11,OASL,PML,ISG20,MX2,SP100,STAT1,IFIT2,ISG15,MX1,IFI35,HLA-B,SOD2             |
| GO:0045088 | regulation of innate immune response       | 5  | 361  | 0.75 | 0.0485 | 9606.ENSP00000242351,9606.ENSP00000354394,9606.ENSP0000369213,9606.ENSP00000399168,9606.ENSP00000409279                                                                                                                                                                                                                 | ZC3HAV1,STAT1,DDX58,HLA-B,OTUD4                                                    |

T = 0 h, IFN $\alpha$ 7 / Untreated

| #Term ID   | Term Description                       | Observed Gene Count | Background Gene Count | Strength | False Discovery Rate | Matching Proteins in Your Input (IDs)                                                                                                                                                                                                                                                                                                                                | Matching Proteins in Your Input (Labels)                                                          |
|------------|----------------------------------------|---------------------|-----------------------|----------|----------------------|----------------------------------------------------------------------------------------------------------------------------------------------------------------------------------------------------------------------------------------------------------------------------------------------------------------------------------------------------------------------|---------------------------------------------------------------------------------------------------|
| GO:0060337 | type I interferon signaling pathway    | 7                   | 65                    | 1.79     | 4.09E-08             | 9606.ENSP00000333657,9606.ENSP00000354394,9606.ENSP00000360891,9606.ENSP00000368699,9606.ENSP00000381601,9606.ENSP00000395590,9606.ENSP00000399168                                                                                                                                                                                                                   | MX2,STAT1,IFIT2,ISG15,MX1,IFI35,HLA-B                                                             |
| GO:002252  | immune effector process                | 12                  | 927                   | 0.87     | 8.63E-06             | 9606.ENSP00000228506,9606.ENSP00000333657,9606.ENSP00000354394,9606.ENSP00000354468,9606.ENSP00000359787,9606.ENSP00000360891,9606.ENSP00000368699,9606.ENSP00000369213,9606.ENSP00000379191,9606.ENSP00000381601,9606.ENSP00000399168,9606.ENSP00000416066                                                                                                          | MLEC,MX2,STAT1,CYB5R3,IFI44L,IFIT2,ISG15,DDX58,CD59,MX1,HLA-B,SERPINA1                            |
| GO:0051607 | defense response to virus              | 7                   | 181                   | 1.35     | 8.63E-06             | 9606.ENSP00000228506,9606.ENSP00000354394,9606.ENSP00000359787,9606.ENSP00000360891,9606.ENSP00000368699,9606.ENSP00000369213,9606.ENSP00000381601                                                                                                                                                                                                                   | MX2,STAT1,IFI44L,IFIT2,ISG15,DDX58,MX1                                                            |
| GO:006952  | defense response                       | 12                  | 1234                  | 0.75     | 1.10E-04             | 9606.ENSP00000262919,9606.ENSP00000333657,9606.ENSP00000354394,9606.ENSP00000359787,9606.ENSP00000360891,9606.ENSP00000368022,9606.ENSP00000368699,9606.ENSP00000369213,9606.ENSP00000381601,9606.ENSP00000395590,9606.ENSP00000399168,9606.ENSP00000416066                                                                                                          | ATRN,MX2,STAT1,IFI44L,IFIT2,OPTN,ISG15,DDX58,MX1,IFI35,HLA-B,SERPINA1                             |
| GO:006955  | immune response                        | 13                  | 1560                  | 0.68     | 1.60E-04             | 9606.ENSP00000228506,9606.ENSP00000333657,9606.ENSP00000354394,9606.ENSP00000354468,9606.ENSP00000360891,9606.ENSP00000368022,9606.ENSP00000368699,9606.ENSP00000369213,9606.ENSP00000379191,9606.ENSP00000381601,9606.ENSP00000395590,9606.ENSP00000399168,9606.ENSP00000416066                                                                                     | MLEC,MX2,STAT1,CYB5R3,IFIT2,OPTN,ISG15,DDX58,CD59,MX1,IFI35,HLA-B,SERPINA1                        |
| GO:0098542 | defense response to other organism     | 10                  | 859                   | 0.83     | 1.90E-04             | 9606.ENSP00000333657,9606.ENSP00000354394,9606.ENSP00000359787,9606.ENSP00000360891,9606.ENSP00000368022,9606.ENSP00000368699,9606.ENSP00000369213,9606.ENSP00000381601,9606.ENSP00000395590,9606.ENSP00000399168                                                                                                                                                    | MX2,STAT1,IFI44L,IFIT2,OPTN,ISG15,DDX58,MX1,IFI35,HLA-B                                           |
| GO:0045087 | innate immune response                 | 9                   | 676                   | 0.88     | 2.20E-04             | 9606.ENSP00000333657,9606.ENSP00000354394,9606.ENSP00000360891,9606.ENSP00000368022,9606.ENSP00000368699,9606.ENSP00000369213,9606.ENSP00000381601,9606.ENSP00000395590,9606.ENSP00000399168                                                                                                                                                                         | MX2,STAT1,IFIT2,OPTN,ISG15,DDX58,MX1,IFI35,HLA-B                                                  |
| GO:0002376 | immune system process                  | 15                  | 2370                  | 0.56     | 3.30E-04             | 9606.ENSP00000228506,9606.ENSP00000264346,9606.ENSP00000333657,9606.ENSP00000354394,9606.ENSP00000354468,9606.ENSP00000359787,9606.ENSP00000360891,9606.ENSP00000368022,9606.ENSP00000368699,9606.ENSP00000369213,9606.ENSP00000379191,9606.ENSP00000381601,9606.ENSP00000395590,9606.ENSP00000399168,9606.ENSP00000416066                                           | MLEC,HERC6,MX2,STAT1,CYB5R3,IFI44L,IFIT2,OPTN,ISG15,DDX58,CD59,MX1,IFI35,HLA-B,SERPINA1           |
| GO:0051707 | response to other organism             | 11                  | 1173                  | 0.73     | 3.30E-04             | 9606.ENSP00000264346,9606.ENSP00000333657,9606.ENSP00000354394,9606.ENSP00000359787,9606.ENSP00000360891,9606.ENSP00000368022,9606.ENSP00000368699,9606.ENSP00000369213,9606.ENSP00000381601,9606.ENSP00000395590,9606.ENSP00000399168                                                                                                                               | HERC6,MX2,STAT1,IFI44L,IFIT2,OPTN,ISG15,DDX58,MX1,IFI35,HLA-B                                     |
| GO:0000266 | mitochondrial fission                  | 3                   | 19                    | 1.96     | 5.90E-04             | 9606.ENSP00000223136,9606.ENSP00000333657,9606.ENSP00000381601                                                                                                                                                                                                                                                                                                       | FIS1,MX2,MX1                                                                                      |
| GO:0006950 | response to stress                     | 17                  | 3267                  | 0.48     | 5.90E-04             | 9606.ENSP00000223136,9606.ENSP00000262919,9606.ENSP00000264389,9606.ENSP00000333657,9606.ENSP00000354394,9606.ENSP00000359787,9606.ENSP00000360891,9606.ENSP00000368022,9606.ENSP00000368455,9606.ENSP00000368699,9606.ENSP00000369213,9606.ENSP00000379191,9606.ENSP00000381601,9606.ENSP00000395590,9606.ENSP00000399168,9606.ENSP00000416066,9606.ENSP00000416959 | FIS1,ATRN,COPS4,MX2,STAT1,IFI44L,IFIT2,OPTN,NUDT2,ISG15,DDX58,CD59,MX1,IFI35,HLA-B,SERPINA1,TRA2B |
| GO:0051704 | multi-organism process                 | 15                  | 2514                  | 0.54     | 5.90E-04             | 9606.ENSP00000261574,9606.ENSP00000264346,9606.ENSP00000316357,9606.ENSP00000333657,9606.ENSP00000336712,9606.ENSP00000354394,9606.ENSP00000359787,9606.ENSP00000360891,9606.ENSP00000368022,9606.ENSP00000368699,9606.ENSP00000369213,9606.ENSP00000381601,9606.ENSP00000395590,9606.ENSP00000399168,9606.ENSP00000406209                                           | IPOS,HERC6,USP9X,MX2,TNPO1,STAT1,IFI44L,IFIT2,OPTN,ISG15,DDX58,MX1,IFI35,HLA-B,EPN1               |
| GO:0070887 | cellular response to chemical stimulus | 15                  | 2672                  | 0.51     | 1.00E-03             | 9606.ENSP00000199814,9606.ENSP00000223136,9606.ENSP00000261574,9606.ENSP00000316357,9606.ENSP00000333657,9606.ENSP00000354394,9606.ENSP00000360891,9606.ENSP00000368022,9606.ENSP00000368455,9606.ENSP00000368699,9606.ENSP00000369213,9606.ENSP00000381601,9606.ENSP00000395590,9606.ENSP00000399168,9606.ENSP00000416959                                           | RBM22,FIS1,IPOS,USP9X,MX2,STAT1,IFIT2,OPTN,NUDT2,ISG15,DDX58,MX1,IFI35,HLA-B,TRA2B                |
| GO:0048525 | negative regulation of viral process   | 4                   | 93                    | 1.39     | 1.50E-03             | 9606.ENSP00000325618,9606.ENSP00000354394,9606.ENSP00000368699,9606.ENSP00000381601                                                                                                                                                                                                                                                                                  | PARP10,STAT1,ISG15,MX1                                                                            |

|            |                                                                          |    |      |      |          |                                                                                                                                                                                                                                                                                                                                                                                                                                                                                                                                                                       |                                                                                                                                                 |
|------------|--------------------------------------------------------------------------|----|------|------|----------|-----------------------------------------------------------------------------------------------------------------------------------------------------------------------------------------------------------------------------------------------------------------------------------------------------------------------------------------------------------------------------------------------------------------------------------------------------------------------------------------------------------------------------------------------------------------------|-------------------------------------------------------------------------------------------------------------------------------------------------|
| GO:0043901 | negative regulation of multi-organism process                            | 5  | 212  | 1.13 | 2.10E-03 | 9606. ENSP00000325618,9606. ENSP00000354394,9606. ENSP00000368699,9606. ENSP00000381601,9606. ENSP00000399168                                                                                                                                                                                                                                                                                                                                                                                                                                                         | PARP10,STAT1,ISG15,MX1,HLA-B                                                                                                                    |
| GO:0071310 | cellular response to organic substance                                   | 13 | 2219 | 0.53 | 2.80E-03 | 9606. ENSP00000223136,9606. ENSP00000261574,9606. ENSP00000316357,9606. ENSP00000336657,9606. ENSP00000354394,9606. ENSP00000360891,9606. ENSP00000368022,9606. ENSP00000368699,9606. ENSP00000369213,9606. ENSP00000381601,9606. ENSP00000395590,9606. ENSP00000399168,9606. ENSP00000416959                                                                                                                                                                                                                                                                         | FIS1,IPO5,USP9X,MX2,STAT1,IFIT2,OPTN,ISG15,DDX58,MX1,IFI35,HLA-B,TRA2B                                                                          |
| GO:0072594 | establishment of protein localization to organelle                       | 6  | 396  | 0.94 | 3.30E-03 | 9606. ENSP00000199814,9606. ENSP00000223136,9606. ENSP00000261574,9606. ENSP00000316357,9606. ENSP00000336712,9606. ENSP00000410339                                                                                                                                                                                                                                                                                                                                                                                                                                   | RBM22,FIS1,IPO5,USP9X,TNPO1,TOMM40                                                                                                              |
| GO:0050896 | response to stimulus                                                     | 25 | 7824 | 0.26 | 4.10E-03 | 9606. ENSP00000199814,9606. ENSP00000216330,9606. ENSP00000223136,9606. ENSP00000228506,9606. ENSP00000261574,9606. ENSP00000262919,9606. ENSP00000264346,9606. ENSP00000264389,9606. ENSP00000316357,9606. ENSP00000333657,9606. ENSP00000354394,9606. ENSP00000354468,9606. ENSP00000359787,9606. ENSP00000360891,9606. ENSP00000368022,9606. ENSP00000368455,9606. ENSP00000368699,9606. ENSP00000369213,9606. ENSP00000379191,9606. ENSP00000381601,9606. ENSP00000395590,9606. ENSP00000399168,9606. ENSP00000406209,9606. ENSP00000416066,9606. ENSP00000416959 | RBM22,FKBP3,FIS1,MLEC,IPO5,ATRN,HERC6,COP54,USP9X,MX2,STAT1,CYB5R3,IFI44L,IFIT2,OPTN,NUDT2,ISG15,DDX58,CD59,MX1,IFI35,HLA-B,EPN1,SERPINA1,TRA2B |
| GO:0003374 | dynamins family protein polymerization involved in mitochondrial fission | 2  | 7    | 2.22 | 5.30E-03 | 9606. ENSP00000333657,9606. ENSP00000381601                                                                                                                                                                                                                                                                                                                                                                                                                                                                                                                           | MX2,MX1                                                                                                                                         |
| GO:0006610 | ribosomal protein import into nucleus                                    | 2  | 8    | 2.16 | 5.30E-03 | 9606. ENSP00000261574,9606. ENSP00000336712                                                                                                                                                                                                                                                                                                                                                                                                                                                                                                                           | IPO5,TNPO1                                                                                                                                      |
| GO:0033365 | protein localization to organelle                                        | 7  | 649  | 0.79 | 5.30E-03 | 9606. ENSP00000199814,9606. ENSP00000223136,9606. ENSP00000261574,9606. ENSP00000316357,9606. ENSP00000336712,9606. ENSP00000368022,9606. ENSP00000410339                                                                                                                                                                                                                                                                                                                                                                                                             | RBM22,FIS1,IPO5,USP9X,TNPO1,OPTN,TOMM40                                                                                                         |
| GO:0043900 | regulation of multi-organism process                                     | 7  | 653  | 0.79 | 5.30E-03 | 9606. ENSP00000325618,9606. ENSP00000354394,9606. ENSP00000368022,9606. ENSP00000368699,9606. ENSP00000369213,9606. ENSP00000381601,9606. ENSP00000399168                                                                                                                                                                                                                                                                                                                                                                                                             | PARP10,STAT1,OPTN,ISG15,DDX58,MX1,HLA-B                                                                                                         |
| GO:0045071 | negative regulation of viral genome replication                          | 3  | 52   | 1.52 | 5.30E-03 | 9606. ENSP00000325618,9606. ENSP00000368699,9606. ENSP00000381601                                                                                                                                                                                                                                                                                                                                                                                                                                                                                                     | PARP10,ISG15,MX1                                                                                                                                |
| GO:0017038 | protein import                                                           | 4  | 150  | 1.19 | 5.60E-03 | 9606. ENSP00000199814,9606. ENSP00000261574,9606. ENSP00000336712,9606. ENSP00000410339                                                                                                                                                                                                                                                                                                                                                                                                                                                                               | RBM22,IPO5,TNPO1,TOMM40                                                                                                                         |
| GO:0009605 | response to external stimulus                                            | 12 | 2152 | 0.51 | 6.50E-03 | 9606. ENSP00000223136,9606. ENSP00000264346,9606. ENSP00000333657,9606. ENSP00000354394,9606. ENSP00000359787,9606. ENSP00000360891,9606. ENSP00000368022,9606. ENSP00000368699,9606. ENSP00000369213,9606. ENSP00000381601,9606. ENSP00000395590,9606. ENSP00000399168                                                                                                                                                                                                                                                                                               | FIS1,HERC6,MX2,STAT1,IFI44L,IFIT2,OPTN,ISG15,DDX58,MX1,IFI35,HLA-B                                                                              |
| GO:0016032 | viral process                                                            | 6  | 571  | 0.78 | 1.41E-02 | 9606. ENSP00000261574,9606. ENSP00000336712,9606. ENSP00000354394,9606. ENSP00000368699,9606. ENSP00000369213,9606. ENSP00000399168                                                                                                                                                                                                                                                                                                                                                                                                                                   | IPO5,TNPO1,STAT1,ISG15,DDX58,HLA-B                                                                                                              |
| GO:0051222 | positive regulation of protein transport                                 | 5  | 365  | 0.9  | 1.41E-02 | 9606. ENSP00000199814,9606. ENSP00000223136,9606. ENSP00000261574,9606. ENSP00000345771,9606. ENSP00000369213                                                                                                                                                                                                                                                                                                                                                                                                                                                         | RBM22,FIS1,IPO5,PFKM,DDX58                                                                                                                      |
| GO:0006607 | NLS-bearing protein import into nucleus                                  | 2  | 21   | 1.74 | 2.11E-02 | 9606. ENSP00000261574,9606. ENSP00000336712                                                                                                                                                                                                                                                                                                                                                                                                                                                                                                                           | IPO5,TNPO1                                                                                                                                      |
| GO:0006606 | protein import into nucleus                                              | 3  | 101  | 1.23 | 2.20E-02 | 9606. ENSP00000199814,9606. ENSP00000261574,9606. ENSP00000336712                                                                                                                                                                                                                                                                                                                                                                                                                                                                                                     | RBM22,IPO5,TNPO1                                                                                                                                |
| GO:0035455 | response to interferon-alpha                                             | 2  | 22   | 1.72 | 2.20E-02 | 9606. ENSP00000333657,9606. ENSP00000360891                                                                                                                                                                                                                                                                                                                                                                                                                                                                                                                           | MX2,IFIT2                                                                                                                                       |
| GO:0007005 | mitochondrion organization                                               | 5  | 424  | 0.83 | 2.21E-02 | 9606. ENSP00000223136,9606. ENSP00000333657,9606. ENSP00000360891,9606. ENSP00000381601,9606. ENSP00000410339                                                                                                                                                                                                                                                                                                                                                                                                                                                         | FIS1,MX2,IFIT2,MX1,TOMM40                                                                                                                       |
| GO:0032727 | positive regulation of interferon-alpha production                       | 2  | 23   | 1.7  | 2.23E-02 | 9606. ENSP00000354394,9606. ENSP00000369213                                                                                                                                                                                                                                                                                                                                                                                                                                                                                                                           | STAT1,DDX58                                                                                                                                     |
| GO:0065003 | protein-containing complex assembly                                      | 9  | 1514 | 0.53 | 2.28E-02 | 9606. ENSP00000199814,9606. ENSP00000223136,9606. ENSP00000333657,9606. ENSP00000345771,9606. ENSP00000379191,9606. ENSP00000381601,9606. ENSP00000416066,9606. ENSP00000416959,9606. ENSP00000464087                                                                                                                                                                                                                                                                                                                                                                 | RBM22,FIS1,MX2,PFKM,CD59,MX1,SERPINA1,TRA2B,RNF213                                                                                              |
| GO:0002230 | positive regulation of defense response to virus by host                 | 2  | 26   | 1.65 | 2.58E-02 | 9606. ENSP00000354394,9606. ENSP00000369213                                                                                                                                                                                                                                                                                                                                                                                                                                                                                                                           | STAT1,DDX58                                                                                                                                     |
| GO:0032479 | regulation of type I interferon production                               | 3  | 112  | 1.19 | 2.58E-02 | 9606. ENSP00000354394,9606. ENSP00000368699,9606. ENSP00000369213                                                                                                                                                                                                                                                                                                                                                                                                                                                                                                     | STAT1,ISG15,DDX58                                                                                                                               |
| GO:0046822 | regulation of nucleocytoplasmic transport                                | 3  | 113  | 1.18 | 2.58E-02 | 9606. ENSP00000199814,9606. ENSP00000261574,9606. ENSP00000333657                                                                                                                                                                                                                                                                                                                                                                                                                                                                                                     | RBM22,IPO5,MX2                                                                                                                                  |
| GO:0046835 | carbohydrate phosphorylation                                             | 2  | 26   | 1.65 | 2.58E-02 | 9606. ENSP00000288078,9606. ENSP00000345771                                                                                                                                                                                                                                                                                                                                                                                                                                                                                                                           | FUK,PFKM                                                                                                                                        |



|            |                                                            |    |      |      |          |                                                                                                                                                                                                                                                                                                                                                                                                                                    |                                                                                                               |
|------------|------------------------------------------------------------|----|------|------|----------|------------------------------------------------------------------------------------------------------------------------------------------------------------------------------------------------------------------------------------------------------------------------------------------------------------------------------------------------------------------------------------------------------------------------------------|---------------------------------------------------------------------------------------------------------------|
| GO:0051716 | cellular response to stimulus                              | 20 | 6212 | 0.27 | 2.58E-02 | 9606.ENSP00000199814,9606.ENSP00000216330,9606.ENSP00000223136,9606.ENSP0000261574,9606.ENSP00000262919,9606.ENSP00000264389,9606.ENSP00000316357,9606.ENSP00000333657,9606.ENSP00000354394,9606.ENSP00000360891,9606.ENSP00000368022,9606.ENSP00000368455,9606.ENSP00000368699,9606.ENSP00000369213,9606.ENSP00000379191,9606.ENSP00000381601,9606.ENSP00000395590,9606.ENSP00000399168,9606.ENSP00000406209,9606.ENSP00000416959 | RBM22,FKBP3,FIS1,IPO5,ATRN,COPS4,USP9X,MX2,STAT1,IFIT2,OPTN,NUDT2,ISG15,DDX58,CD59,MX1,IFI35,HLA-B,EPN1,TRA2B |
| GO:0045648 | positive regulation of erythrocyte differentiation         | 2  | 29   | 1.6  | 2.93E-02 | 9606.ENSP00000354394,9606.ENSP00000368699                                                                                                                                                                                                                                                                                                                                                                                          | STAT1,ISG15                                                                                                   |
| GO:0033120 | positive regulation of RNA splicing                        | 2  | 31   | 1.57 | 3.04E-02 | 9606.ENSP00000199814,9606.ENSP00000416959                                                                                                                                                                                                                                                                                                                                                                                          | RBM22,TRA2B                                                                                                   |
| GO:0043312 | neutrophil degranulation                                   | 5  | 485  | 0.77 | 3.04E-02 | 9606.ENSP00000228506,9606.ENSP00000354468,9606.ENSP00000379191,9606.ENSP0000399168,9606.ENSP00000416066                                                                                                                                                                                                                                                                                                                            | MLEC,CYB5R3,CD59,HLA-B,SERPINA1                                                                               |
| GO:0061024 | membrane organization                                      | 6  | 729  | 0.68 | 3.04E-02 | 9606.ENSP00000223136,9606.ENSP00000333657,9606.ENSP00000379191,9606.ENSP0000381601,9606.ENSP00000406209,9606.ENSP00000416066                                                                                                                                                                                                                                                                                                       | FIS1,MX2,CD59,MX1,EPN1,SERPINA1                                                                               |
| GO:0090316 | positive regulation of intracellular protein transport     | 3  | 126  | 1.14 | 3.04E-02 | 9606.ENSP00000199814,9606.ENSP00000223136,9606.ENSP00000261574                                                                                                                                                                                                                                                                                                                                                                     | RBM22,FIS1,IPO5                                                                                               |
| GO:0009165 | nucleotide biosynthetic process                            | 4  | 291  | 0.9  | 3.12E-02 | 9606.ENSP00000288078,9606.ENSP00000325618,9606.ENSP00000345771,9606.ENSP0000363480                                                                                                                                                                                                                                                                                                                                                 | FUK,PARP10,PFKM,DLG3                                                                                          |
| GO:0034613 | cellular protein localization                              | 8  | 1367 | 0.53 | 3.35E-02 | 9606.ENSP00000199814,9606.ENSP00000223136,9606.ENSP00000261574,9606.ENSP0000316357,9606.ENSP00000336712,9606.ENSP00000363480,9606.ENSP00000368022,9606.ENSP00000410339                                                                                                                                                                                                                                                             | RBM22,FIS1,IPO5,USP9X,TNPO1,DLG3,OPTN,TOMM40                                                                  |
| GO:0006810 | transport                                                  | 15 | 4130 | 0.32 | 3.54E-02 | 9606.ENSP00000199814,9606.ENSP00000223136,9606.ENSP00000228506,9606.ENSP0000261574,9606.ENSP00000316357,9606.ENSP00000333657,9606.ENSP00000336712,9606.ENSP00000354468,9606.ENSP00000363480,9606.ENSP00000368022,9606.ENSP00000379191,9606.ENSP00000399168,9606.ENSP00000406209,9606.ENSP00000410339,9606.ENSP00000416066                                                                                                          | RBM22,FIS1,MLEC,IPO5,USP9X,MX2,TNPO1,CYB5R3,DLG3,OPTN,CD59,HLA-B,EPN1,TOMM40,SERPINA1                         |
| GO:0015031 | protein transport                                          | 8  | 1391 | 0.52 | 3.57E-02 | 9606.ENSP00000199814,9606.ENSP00000223136,9606.ENSP00000261574,9606.ENSP0000316357,9606.ENSP00000333657,9606.ENSP00000336712,9606.ENSP00000368022,9606.ENSP00000410339                                                                                                                                                                                                                                                             | RBM22,FIS1,IPO5,USP9X,MX2,TNPO1,OPTN,TOMM40                                                                   |
| GO:0031324 | negative regulation of cellular metabolic process          | 11 | 2463 | 0.41 | 3.57E-02 | 9606.ENSP00000261574,9606.ENSP00000262177,9606.ENSP00000316357,9606.ENSP0000325618,9606.ENSP00000354394,9606.ENSP00000363480,9606.ENSP00000368022,9606.ENSP00000368699,9606.ENSP00000379191,9606.ENSP00000416066,9606.ENSP00000416959                                                                                                                                                                                              | IPO5,DNAJB6,USP9X,PARP10,STAT1,DLG3,OPTN,ISG15,CD59,SERPINA1,TRA2B                                            |
| GO:0046907 | intracellular transport                                    | 8  | 1390 | 0.52 | 3.57E-02 | 9606.ENSP00000199814,9606.ENSP00000223136,9606.ENSP00000261574,9606.ENSP0000316357,9606.ENSP00000336712,9606.ENSP00000379191,9606.ENSP00000410339,9606.ENSP00000416066                                                                                                                                                                                                                                                             | RBM22,FIS1,IPO5,USP9X,TNPO1,CD59,TOMM40,SERPINA1                                                              |
| GO:0016043 | cellular component organization                            | 17 | 5163 | 0.28 | 3.91E-02 | 9606.ENSP00000199814,9606.ENSP00000223136,9606.ENSP00000262177,9606.ENSP0000264389,9606.ENSP00000316357,9606.ENSP00000333657,9606.ENSP00000336712,9606.ENSP00000345771,9606.ENSP00000360891,9606.ENSP00000368022,9606.ENSP00000379191,9606.ENSP00000381601,9606.ENSP00000406209,9606.ENSP00000410339,9606.ENSP00000416066,9606.ENSP00000416959,9606.ENSP00000464087                                                                | RBM22,FIS1,DNAJB6,COPS4,USP9X,MX2,TNPO1,PFKM,IFIT2,OPTN,CD59,MX1,EPN1,TOMM40,SERPINA1,TRA2B,RNF213            |
| GO:0032386 | regulation of intracellular transport                      | 4  | 335  | 0.84 | 3.91E-02 | 9606.ENSP00000199814,9606.ENSP00000223136,9606.ENSP00000261574,9606.ENSP0000333657                                                                                                                                                                                                                                                                                                                                                 | RBM22,FIS1,IPO5,MX2                                                                                           |
| GO:0032480 | negative regulation of type I interferon production        | 2  | 43   | 1.43 | 3.91E-02 | 9606.ENSP00000368699,9606.ENSP00000369213                                                                                                                                                                                                                                                                                                                                                                                          | ISG15,DDX58                                                                                                   |
| GO:0042307 | positive regulation of protein import into nucleus         | 2  | 42   | 1.44 | 3.91E-02 | 9606.ENSP00000199814,9606.ENSP00000261574                                                                                                                                                                                                                                                                                                                                                                                          | RBM22,IPO5                                                                                                    |
| GO:0043124 | negative regulation of I-kappaB kinase/NF-kappaB signaling | 2  | 42   | 1.44 | 3.91E-02 | 9606.ENSP00000354394,9606.ENSP00000368022                                                                                                                                                                                                                                                                                                                                                                                          | STAT1,OPTN                                                                                                    |
| GO:0006886 | intracellular protein transport                            | 6  | 836  | 0.62 | 4.00E-02 | 9606.ENSP00000199814,9606.ENSP00000223136,9606.ENSP00000261574,9606.ENSP0000316357,9606.ENSP00000336712,9606.ENSP00000410339                                                                                                                                                                                                                                                                                                       | RBM22,FIS1,IPO5,USP9X,TNPO1,TOMM40                                                                            |
| GO:0051641 | cellular localization                                      | 10 | 2180 | 0.42 | 4.03E-02 | 9606.ENSP00000199814,9606.ENSP00000223136,9606.ENSP00000261574,9606.ENSP0000316357,9606.ENSP00000336712,9606.ENSP00000363480,9606.ENSP00000368022,9606.ENSP00000379191,9606.ENSP00000410339,9606.ENSP00000416066                                                                                                                                                                                                                   | RBM22,FIS1,IPO5,USP9X,TNPO1,DLG3,OPTN,CD59,TOMM40,SERPINA1                                                    |
| GO:0042593 | glucose homeostasis                                        | 3  | 169  | 1.01 | 4.08E-02 | 9606.ENSP00000223136,9606.ENSP00000345771,9606.ENSP00000416959                                                                                                                                                                                                                                                                                                                                                                     | FIS1,PFKM,TRA2B                                                                                               |
| GO:0007166 | cell surface receptor signaling pathway                    | 10 | 2198 | 0.42 | 4.10E-02 | 9606.ENSP00000316357,9606.ENSP00000333657,9606.ENSP00000354394,9606.ENSP0000360891,9606.ENSP00000368699,9606.ENSP00000379191,9606.ENSP00000381601,9606.ENSP00000395590,9606.ENSP00000399168,9606.ENSP00000406209                                                                                                                                                                                                                   | USP9X,MX2,STAT1,IFIT2,ISG15,CD59,MX1,IFI35,HLA-B,EPN1                                                         |

|            |                                       |    |       |      |          |                                                                                                                                                                                                                                                                                                                                                                                                                                                                                                                                                                                                                                                                                                 |                                                                                                                                                                                          |
|------------|---------------------------------------|----|-------|------|----------|-------------------------------------------------------------------------------------------------------------------------------------------------------------------------------------------------------------------------------------------------------------------------------------------------------------------------------------------------------------------------------------------------------------------------------------------------------------------------------------------------------------------------------------------------------------------------------------------------------------------------------------------------------------------------------------------------|------------------------------------------------------------------------------------------------------------------------------------------------------------------------------------------|
| GO:0061025 | membrane fusion                       | 3  | 170   | 1.01 | 4.10E-02 | 9606.ENSPO0000223136,9606.ENSPO0000333657,9606.ENSPO0000381601                                                                                                                                                                                                                                                                                                                                                                                                                                                                                                                                                                                                                                  | FIS1,MX2,MX1                                                                                                                                                                             |
| GO:0002697 | regulation of immune effector process | 4  | 362   | 0.8  | 4.25E-02 | 9606.ENSPO0000354394,9606.ENSPO0000369213,9606.ENSPO0000379191,9606.ENSPO0000399168                                                                                                                                                                                                                                                                                                                                                                                                                                                                                                                                                                                                             | STAT1,DDX58,CD59,HLA-B                                                                                                                                                                   |
| GO:0009435 | NAD biosynthetic process              | 2  | 51    | 1.35 | 4.50E-02 | 9606.ENSPO0000325618,9606.ENSPO0000345771                                                                                                                                                                                                                                                                                                                                                                                                                                                                                                                                                                                                                                                       | PARP10,PFKM                                                                                                                                                                              |
| GO:0006979 | response to oxidative stress          | 4  | 373   | 0.79 | 4.63E-02 | 9606.ENSPO0000262919,9606.ENSPO0000354394,9606.ENSPO0000368455,9606.ENSPO0000416959                                                                                                                                                                                                                                                                                                                                                                                                                                                                                                                                                                                                             | ATRN,STAT1,NUDT2,TRA2B                                                                                                                                                                   |
| GO:0009987 | cellular process                      | 32 | 14652 | 0.1  | 4.72E-02 | 9606.ENSPO0000199814,9606.ENSPO0000216330,9606.ENSPO0000223136,9606.ENSPO0000228506,9606.ENSPO0000261574,9606.ENSPO0000262177,9606.ENSPO0000262919,9606.ENSPO0000264346,9606.ENSPO0000264389,9606.ENSPO0000288078,9606.ENSPO0000316357,9606.ENSPO0000325618,9606.ENSPO0000333657,9606.ENSPO0000336712,9606.ENSPO0000345771,9606.ENSPO0000354394,9606.ENSPO0000354468,9606.ENSPO0000360891,9606.ENSPO0000363480,9606.ENSPO0000368022,9606.ENSPO0000368455,9606.ENSPO0000368699,9606.ENSPO0000369213,9606.ENSPO0000379191,9606.ENSPO0000381601,9606.ENSPO0000395590,9606.ENSPO0000399168,9606.ENSPO0000406209,9606.ENSPO0000410339,9606.ENSPO0000416066,9606.ENSPO0000416959,9606.ENSPO0000464087 | RBM22,FKBP3,FIS1,MLEC,IPO5,DNAJB6,ATRN,HERC6,COPS4,FUK,USP9X,PARP10,MX2,TNPO1,PFKM,STAT1,CYB5R3,IFIT2,DLG3,OPTN,NUDT2,ISG15,DDX58,CD59,MX1,IFI35,HLA-B,EPN1,TOMM40,SERPINA1,TRA2B,RNF213 |
| GO:0032880 | regulation of protein localization    | 6  | 901   | 0.58 | 4.75E-02 | 9606.ENSPO0000199814,9606.ENSPO0000223136,9606.ENSPO0000261574,9606.ENSPO0000262177,9606.ENSPO0000345771,9606.ENSPO0000369213                                                                                                                                                                                                                                                                                                                                                                                                                                                                                                                                                                   | RBM22,FIS1,IPO5,DNAJB6,PFKM,DDX58                                                                                                                                                        |

T = 0 h, IFN $\alpha$ 16 / Untreated

| #Term ID   | Term Description                                                             | Observed Gene Count | Background Gene Count | Strength | False Discovery Rate | Matching Proteins in Your Input (IDs)                                                                                                                                                                                                                                            | Matching Proteins in Your Input (Labels)                                     |
|------------|------------------------------------------------------------------------------|---------------------|-----------------------|----------|----------------------|----------------------------------------------------------------------------------------------------------------------------------------------------------------------------------------------------------------------------------------------------------------------------------|------------------------------------------------------------------------------|
| GO:0002906 | negative regulation of mature B cell apoptotic process                       | 2                   | 4                     | 2.65     | 1.36E-02             | 9606.ENSP00000009530,9606.ENSP00000361965                                                                                                                                                                                                                                        | CD74,ADA                                                                     |
| GO:0043085 | positive regulation of catalytic activity                                    | 9                   | 1381                  | 0.76     | 1.36E-02             | 9606.ENSP00000009530,9606.ENSP00000263212,9606.ENSP00000321537,9606.ENSP00000325863,9606.ENSP00000363480,9606.ENSP0000374409,9606.ENSP00000377036,9606.ENSP00000378040,9606.ENSP00000379346                                                                                      | CD74,PPM1F,LLGL1,MRE11A,DLG3,PKP4,PPP2R4,BAD,ADNP                            |
| GO:0030155 | regulation of cell adhesion                                                  | 6                   | 623                   | 0.93     | 1.85E-02             | 9606.ENSP00000009530,9606.ENSP00000259206,9606.ENSP00000263212,9606.ENSP00000361965,9606.ENSP00000374409,9606.ENSP0000378040                                                                                                                                                     | CD74,IL1RN,PPM1F,ADA,PKP4,BAD                                                |
| GO:0050790 | regulation of catalytic activity                                             | 10                  | 2249                  | 0.6      | 1.85E-02             | 9606.ENSP00000009530,9606.ENSP00000263212,9606.ENSP00000321537,9606.ENSP00000325863,9606.ENSP00000363480,9606.ENSP0000374409,9606.ENSP00000377036,9606.ENSP00000378040,9606.ENSP00000379346,9606.ENSP00000416066                                                                 | CD74,PPM1F,LLGL1,MRE11A,DLG3,PKP4,PPP2R4,BAD,ADNP,SERPINA1                   |
| GO:0045582 | positive regulation of T cell differentiation                                | 3                   | 78                    | 1.53     | 2.03E-02             | 9606.ENSP00000009530,9606.ENSP00000361965,9606.ENSP00000378040                                                                                                                                                                                                                   | CD74,ADA,BAD                                                                 |
| GO:0050871 | positive regulation of B cell activation                                     | 3                   | 80                    | 1.52     | 2.03E-02             | 9606.ENSP00000009530,9606.ENSP00000361965,9606.ENSP00000378040                                                                                                                                                                                                                   | CD74,ADA,BAD                                                                 |
| GO:0042981 | regulation of apoptotic process                                              | 8                   | 1501                  | 0.68     | 2.10E-02             | 9606.ENSP00000009530,9606.ENSP00000263212,9606.ENSP00000325863,9606.ENSP00000361965,9606.ENSP00000369038,9606.ENSP00000377036,9606.ENSP00000378040,9606.ENSP00000379346                                                                                                          | CD74,PPM1F,MRE11A,ADA,EEF1E1,PPP2R4,BAD,ADNP                                 |
| GO:0033674 | positive regulation of kinase activity                                       | 5                   | 553                   | 0.91     | 2.74E-02             | 9606.ENSP00000009530,9606.ENSP00000325863,9606.ENSP00000363480,9606.ENSP00000378040,9606.ENSP00000379346                                                                                                                                                                         | CD74,MRE11A,DLG3,BAD,ADNP                                                    |
| GO:0043549 | regulation of kinase activity                                                | 6                   | 849                   | 0.8      | 2.74E-02             | 9606.ENSP00000009530,9606.ENSP00000263212,9606.ENSP00000325863,9606.ENSP00000363480,9606.ENSP00000378040,9606.ENSP00000379346                                                                                                                                                    | CD74,PPM1F,MRE11A,DLG3,BAD,ADNP                                              |
| GO:0051336 | regulation of hydrolase activity                                             | 7                   | 1238                  | 0.7      | 2.74E-02             | 9606.ENSP00000263212,9606.ENSP00000321537,9606.ENSP00000363480,9606.ENSP00000374409,9606.ENSP00000377036,9606.ENSP00000378040,9606.ENSP00000416066                                                                                                                               | PPM1F,LLGL1,DLG3,PKP4,PPP2R4,BAD,SERPINA1                                    |
| GO:0065009 | regulation of molecular function                                             | 11                  | 3322                  | 0.47     | 2.87E-02             | 9606.ENSP00000009530,9606.ENSP00000259206,9606.ENSP00000263212,9606.ENSP00000321537,9606.ENSP00000325863,9606.ENSP00000363480,9606.ENSP00000374409,9606.ENSP00000377036,9606.ENSP00000378040,9606.ENSP00000379346,9606.ENSP00000416066                                           | CD74,IL1RN,PPM1F,LLGL1,MRE11A,DLG3,PKP4,PPP2R4,BAD,ADNP,SERPINA1             |
| GO:0043516 | regulation of DNA damage response, signal transduction by p53 class mediator | 2                   | 31                    | 1.76     | 3.72E-02             | 9606.ENSP00000009530,9606.ENSP00000369038                                                                                                                                                                                                                                        | CD74,EEF1E1                                                                  |
| GO:0022407 | regulation of cell-cell adhesion                                             | 4                   | 366                   | 0.99     | 3.87E-02             | 9606.ENSP00000009530,9606.ENSP00000259206,9606.ENSP00000361965,9606.ENSP00000378040                                                                                                                                                                                              | CD74,IL1RN,ADA,BAD                                                           |
| GO:0043094 | cellular metabolic compound salvage                                          | 2                   | 36                    | 1.69     | 3.98E-02             | 9606.ENSP00000273920,9606.ENSP00000361965                                                                                                                                                                                                                                        | ENOPH1,ADA                                                                   |
| GO:0045785 | positive regulation of cell adhesion                                         | 4                   | 375                   | 0.98     | 3.98E-02             | 9606.ENSP00000009530,9606.ENSP00000263212,9606.ENSP00000361965,9606.ENSP00000378040                                                                                                                                                                                              | CD74,PPM1F,ADA,BAD                                                           |
| GO:0048519 | negative regulation of biological process                                    | 13                  | 4953                  | 0.37     | 3.98E-02             | 9606.ENSP00000009530,9606.ENSP00000259206,9606.ENSP00000263212,9606.ENSP00000325863,9606.ENSP00000357980,9606.ENSP00000361965,9606.ENSP00000363480,9606.ENSP00000369038,9606.ENSP00000377036,9606.ENSP00000378040,9606.ENSP00000379346,9606.ENSP00000397798,9606.ENSP00000416066 | CD74,IL1RN,PPM1F,MRE11A,HTRA1,ADA,DLG3,EEF1E1,PPP2R4,BAD,ADNP,RPL17,SERPINA1 |

|            |                                                           |    |      |      |          |                                                                                                                                                                                                                                                             |                                                                        |
|------------|-----------------------------------------------------------|----|------|------|----------|-------------------------------------------------------------------------------------------------------------------------------------------------------------------------------------------------------------------------------------------------------------|------------------------------------------------------------------------|
| GO:0045937 | positive regulation of phosphate metabolic process        | 6  | 1052 | 0.71 | 4.01E-02 | 9606.ENSP00000009530,9606.ENSP00000325863,9606.ENSP00000363480,9606.ENSP00000377036,9606.ENSP00000378040,9606.ENSP0000379346                                                                                                                                | CD74,MRE11A,DLG3,PPP2R4,BAD,ADNP                                       |
| GO:0032270 | positive regulation of cellular protein metabolic process | 7  | 1496 | 0.62 | 4.10E-02 | 9606.ENSP00000009530,9606.ENSP00000263212,9606.ENSP00000325863,9606.ENSP00000363480,9606.ENSP00000377036,9606.ENSP00000378040,9606.ENSP00000379346                                                                                                          | CD74,PPM1F,MRE11A,DLG3,PPP2R4,BAD,ADNP                                 |
| GO:0046903 | secretion                                                 | 6  | 1070 | 0.7  | 4.10E-02 | 9606.ENSP00000259206,9606.ENSP00000278505,9606.ENSP00000321537,9606.ENSP00000355605,9606.ENSP00000361965,9606.ENSP00000416066                                                                                                                               | IL1RN,ENDOD1,LLGL1,EXOC8,ADA,SERPINA1                                  |
| GO:0030890 | positive regulation of B cell proliferation               | 2  | 42   | 1.63 | 4.32E-02 | 9606.ENSP00000009530,9606.ENSP00000361965                                                                                                                                                                                                                   | CD74,ADA                                                               |
| GO:0050731 | positive regulation of peptidyl-tyrosine phosphorylation  | 3  | 180  | 1.17 | 4.32E-02 | 9606.ENSP00000009530,9606.ENSP00000363480,9606.ENSP00000379346                                                                                                                                                                                              | CD74,DLG3,ADNP                                                         |
| GO:0006953 | acute-phase response                                      | 2  | 45   | 1.6  | 4.50E-02 | 9606.ENSP00000259206,9606.ENSP00000416066                                                                                                                                                                                                                   | IL1RN,SERPINA1                                                         |
| GO:0044092 | negative regulation of molecular function                 | 6  | 1119 | 0.68 | 4.50E-02 | 9606.ENSP00000259206,9606.ENSP00000263212,9606.ENSP00000363480,9606.ENSP00000377036,9606.ENSP00000379346,9606.ENSP00000416066                                                                                                                               | IL1RN,PPM1F,DLG3,PPP2R4,ADNP,SERPINA1                                  |
| GO:0048523 | negative regulation of cellular process                   | 12 | 4454 | 0.38 | 4.50E-02 | 9606.ENSP00000009530,9606.ENSP00000259206,9606.ENSP00000263212,9606.ENSP00000325863,9606.ENSP00000357980,9606.ENSP00000361965,9606.ENSP00000363480,9606.ENSP00000369038,9606.ENSP00000377036,9606.ENSP00000378040,9606.ENSP00000379346,9606.ENSP00000416066 | CD74,IL1RN,PPM1F,MRE11A,HTRA1,ADA,DLG3,EEF1E1,PPP2R4,BAD,ADNP,SERPINA1 |
| GO:0051345 | positive regulation of hydrolase activity                 | 5  | 742  | 0.78 | 4.50E-02 | 9606.ENSP00000263212,9606.ENSP00000321537,9606.ENSP00000374409,9606.ENSP00000377036,9606.ENSP00000378040                                                                                                                                                    | PPM1F,LLGL1,PKP4,PPP2R4,BAD                                            |

T = 0 h, IFN $\alpha$ 3 / Untreated

| #Term ID   | Term Description                                | Observed Gene Count | Background Gene Count | Strength | False Discovery Rate | Matching Proteins in Your Input (IDs)                                                                                                                                                                                                                                            | Matching Proteins in Your Input (Labels)                                  |
|------------|-------------------------------------------------|---------------------|-----------------------|----------|----------------------|----------------------------------------------------------------------------------------------------------------------------------------------------------------------------------------------------------------------------------------------------------------------------------|---------------------------------------------------------------------------|
| GO:0060337 | type I interferon signaling pathway             | 9                   | 65                    | 1.83     | 3.01E-11             | 9606.ENSP00000257570,9606.ENSP00000306565,9606.ENSP00000333657,9606.ENSP00000354394,9606.ENSP00000360891,9606.ENSP0000368699,9606.ENSP00000381601,9606.ENSP00000395590,9606.ENSP00000399168                                                                                      | OASL,ISG20,MX2,STAT1,IFIT2,ISG15,MX1,IFI35,HLA-B                          |
| GO:0051607 | defense response to virus                       | 9                   | 181                   | 1.39     | 4.23E-08             | 9606.ENSP00000257570,9606.ENSP00000306565,9606.ENSP00000333657,9606.ENSP00000354394,9606.ENSP00000359787,9606.ENSP0000360891,9606.ENSP00000368699,9606.ENSP00000377344,9606.ENSP00000381601                                                                                      | OASL,ISG20,MX2,STAT1,IFI44L,IFIT2,ISG15,DDX60,MX1                         |
| GO:0002252 | immune effector process                         | 13                  | 927                   | 0.84     | 5.02E-06             | 9606.ENSP00000257570,9606.ENSP00000262746,9606.ENSP00000265016,9606.ENSP00000306565,9606.ENSP00000333657,9606.ENSP00000354394,9606.ENSP00000354468,9606.ENSP00000359787,9606.ENSP00000360891,9606.ENSP00000368699,9606.ENSP00000377344,9606.ENSP00000381601,9606.ENSP00000399168 | OASL,PRDX1,BST1,ISG20,MX2,STAT1,CYB5R3,IFI44L,IFIT2,ISG15,DDX60,MX1,HLA-B |
| GO:0051186 | cofactor metabolic process                      | 10                  | 467                   | 1.02     | 5.35E-06             | 9606.ENSP00000262746,9606.ENSP00000265016,9606.ENSP00000265594,9606.ENSP00000307241,9606.ENSP00000311984,9606.ENSP00000325618,9606.ENSP00000327070,9606.ENSP00000352584,9606.ENSP00000354468,9606.ENSP00000361140                                                                | PRDX1,BST1,MCCC1,PDHB,CARKD,PARP10,MDH2,AKR1B10,CYB5R3,AKR1A1             |
| GO:0048525 | negative regulation of viral process            | 6                   | 93                    | 1.5      | 7.63E-06             | 9606.ENSP00000257570,9606.ENSP00000306565,9606.ENSP00000325618,9606.ENSP00000354394,9606.ENSP00000368699,9606.ENSP00000381601                                                                                                                                                    | OASL,ISG20,PARP10,STAT1,ISG15,MX1                                         |
| GO:0050792 | regulation of viral process                     | 7                   | 174                   | 1.29     | 1.05E-05             | 9606.ENSP00000254950,9606.ENSP00000257570,9606.ENSP00000306565,9606.ENSP00000325618,9606.ENSP00000354394,9606.ENSP00000368699,9606.ENSP00000381601                                                                                                                               | VPS4A,OASL,ISG20,PARP10,STAT1,ISG15,MX1                                   |
| GO:0045087 | innate immune response                          | 11                  | 676                   | 0.9      | 1.06E-05             | 9606.ENSP00000257570,9606.ENSP00000262746,9606.ENSP00000306565,9606.ENSP00000333657,9606.ENSP00000354394,9606.ENSP00000360891,9606.ENSP00000368699,9606.ENSP00000377344,9606.ENSP00000381601,9606.ENSP00000395590,9606.ENSP00000399168                                           | OASL,PRDX1,ISG20,MX2,STAT1,IFIT2,ISG15,DDX60,MX1,IFI35,HLA-B              |
| GO:0045071 | negative regulation of viral genome replication | 5                   | 52                    | 1.67     | 1.13E-05             | 9606.ENSP00000257570,9606.ENSP00000306565,9606.ENSP00000325618,9606.ENSP00000368699,9606.ENSP00000381601                                                                                                                                                                         | OASL,ISG20,PARP10,ISG15,MX1                                               |
| GO:0098542 | defense response to other organism              | 12                  | 859                   | 0.83     | 1.13E-05             | 9606.ENSP00000257570,9606.ENSP00000262746,9606.ENSP00000306565,9606.ENSP00000333657,9606.ENSP00000354394,9606.ENSP00000359787,9606.ENSP00000360891,9606.ENSP00000368699,9606.ENSP00000377344,9606.ENSP00000381601,9606.ENSP00000395590,9606.ENSP00000399168                      | OASL,PRDX1,ISG20,MX2,STAT1,IFI44L,IFIT2,ISG15,DDX60,MX1,IFI35,HLA-B       |
| GO:0006732 | coenzyme metabolic process                      | 8                   | 297                   | 1.12     | 1.54E-05             | 9606.ENSP00000265016,9606.ENSP00000265594,9606.ENSP00000307241,9606.ENSP00000311984,9606.ENSP00000325618,9606.ENSP00000327070,9606.ENSP00000354468,9606.ENSP00000361140                                                                                                          | BST1,MCCC1,PDHB,CARKD,PARP10,MDH2,CYB5R3,AKR1A1                           |
| GO:0043901 | negative regulation of multi-organism process   | 7                   | 212                   | 1.21     | 2.30E-05             | 9606.ENSP00000257570,9606.ENSP00000306565,9606.ENSP00000325618,9606.ENSP00000354394,9606.ENSP00000368699,9606.ENSP00000381601,9606.ENSP00000399168                                                                                                                               | OASL,ISG20,PARP10,STAT1,ISG15,MX1,HLA-B                                   |

|            |                                           |    |      |      |          |                                                                                                                                                                                                                                                                                                                                                                                                       |                                                                                                                  |
|------------|-------------------------------------------|----|------|------|----------|-------------------------------------------------------------------------------------------------------------------------------------------------------------------------------------------------------------------------------------------------------------------------------------------------------------------------------------------------------------------------------------------------------|------------------------------------------------------------------------------------------------------------------|
| GO:0009605 | response to external stimulus             | 17 | 2152 | 0.59 | 2.83E-05 | 9606. ENSP00000223136, 9606. ENSP00000257570, 9606. ENSP00000262746, 9606. ENSP00000264108, 9606. ENSP00000264346, 9606. ENSP00000306565, 9606. ENSP00000317790, 9606. ENSP00000333657, 9606. ENSP00000354394, 9606. ENSP00000359787, 9606. ENSP00000360891, 9606. ENSP00000368699, 9606. ENSP00000377344, 9606. ENSP00000381601, 9606. ENSP00000395590, 9606. ENSP00000399168, 9606. ENSP00000457513 | FIS1, OASL, PRDX1, HAT1, HERC6, ISG20, SPTBN5, MX2, STAT1, IFI44L, IFIT2, ISG15, DDX60, MX1, IFI35, HLA-B, COX41 |
| GO:0051707 | response to other organism                | 13 | 1173 | 0.73 | 2.83E-05 | 9606. ENSP00000257570, 9606. ENSP00000262746, 9606. ENSP00000264346, 9606. ENSP00000306565, 9606. ENSP00000333657, 9606. ENSP00000354394, 9606. ENSP00000359787, 9606. ENSP00000360891, 9606. ENSP00000368699, 9606. ENSP00000377344, 9606. ENSP00000381601, 9606. ENSP00000395590, 9606. ENSP00000399168                                                                                             | OASL, PRDX1, HERC6, ISG20, MX2, STAT1, IFI44L, IFIT2, ISG15, DDX60, MX1, IFI35, HLA-B                            |
| GO:1903900 | regulation of viral life cycle            | 6  | 135  | 1.34 | 2.83E-05 | 9606. ENSP00000254950, 9606. ENSP00000257570, 9606. ENSP00000306565, 9606. ENSP00000325618, 9606. ENSP00000368699, 9606. ENSP00000381601                                                                                                                                                                                                                                                              | VPS4A, OASL, ISG20, PARP10, ISG15, MX1                                                                           |
| GO:0019221 | cytokine-mediated signaling pathway       | 10 | 655  | 0.87 | 3.89E-05 | 9606. ENSP00000257570, 9606. ENSP00000306565, 9606. ENSP00000333657, 9606. ENSP00000354394, 9606. ENSP00000360891, 9606. ENSP00000368699, 9606. ENSP00000381601, 9606. ENSP00000395590, 9606. ENSP00000399168, 9606. ENSP00000480826                                                                                                                                                                  | OASL, ISG20, MX2, STAT1, IFIT2, ISG15, MX1, IFI35, HLA-B, HIST1H3A                                               |
| GO:0046496 | nicotinamide nucleotide metabolic process | 5  | 107  | 1.36 | 1.70E-04 | 9606. ENSP00000265016, 9606. ENSP00000307241, 9606. ENSP0000031984, 9606. ENSP00000325618, 9606. ENSP00000327070                                                                                                                                                                                                                                                                                      | BST1, PDHB, CAR KD, PARP10, MDH2                                                                                 |
| GO:0043900 | regulation of multi-organism process      | 9  | 653  | 0.83 | 2.70E-04 | 9606. ENSP00000254950, 9606. ENSP00000257570, 9606. ENSP00000306565, 9606. ENSP00000325618, 9606. ENSP00000354394, 9606. ENSP00000368699, 9606. ENSP00000377344, 9606. ENSP00000381601, 9606. ENSP00000399168                                                                                                                                                                                         | VPS4A, OASL, ISG20, PARP10, STAT1, ISG15, DDX60, MX1, HLA-B                                                      |
| GO:0006733 | oxidoreduction coenzyme metabolic process | 5  | 124  | 1.29 | 2.80E-04 | 9606. ENSP00000265016, 9606. ENSP00000307241, 9606. ENSP0000031984, 9606. ENSP00000325618, 9606. ENSP00000327070                                                                                                                                                                                                                                                                                      | BST1, PDHB, CAR KD, PARP10, MDH2                                                                                 |
| GO:0006955 | immune response                           | 13 | 1560 | 0.61 | 3.60E-04 | 9606. ENSP00000257570, 9606. ENSP00000262746, 9606. ENSP00000265016, 9606. ENSP00000306565, 9606. ENSP00000333657, 9606. ENSP00000354394, 9606. ENSP00000354468, 9606. ENSP00000360891, 9606. ENSP00000368699, 9606. ENSP00000377344, 9606. ENSP00000381601, 9606. ENSP00000395590, 9606. ENSP00000399168                                                                                             | OASL, PRDX1, BST1, ISG20, MX2, STAT1, CYB5R3, IFIT2, ISG15, DDX60, MX1, IFI35, HLA-B                             |
| GO:0000266 | mitochondrial fission                     | 3  | 19   | 1.89 | 4.90E-04 | 9606. ENSP00000223136, 9606. ENSP00000333657, 9606. ENSP00000381601                                                                                                                                                                                                                                                                                                                                   | FIS1, MX2, MX1                                                                                                   |
| GO:0019674 | NAD metabolic process                     | 4  | 66   | 1.47 | 5.00E-04 | 9606. ENSP00000265016, 9606. ENSP0000031984, 9606. ENSP00000325618, 9606. ENSP00000327070                                                                                                                                                                                                                                                                                                             | BST1, CAR KD, PARP10, MDH2                                                                                       |
| GO:0055114 | oxidation-reduction process               | 10 | 932  | 0.72 | 5.50E-04 | 9606. ENSP00000262746, 9606. ENSP00000307241, 9606. ENSP0000031984, 9606. ENSP00000325618, 9606. ENSP00000327070, 9606. ENSP00000333657, 9606. ENSP00000354394, 9606. ENSP00000354468, 9606. ENSP00000356218, 9606. ENSP00000361140, 9606. ENSP00000457513                                                                                                                                            | PRDX1, PDHB, CRAT, CHCHD5, MDH2, AKR1B10, CYB5R3, CYB5R1, AKR1A1, COX41                                          |
| GO:0009060 | aerobic respiration                       | 4  | 71   | 1.44 | 6.10E-04 | 9606. ENSP00000307241, 9606. ENSP00000325618, 9606. ENSP00000327070, 9606. ENSP00000457513                                                                                                                                                                                                                                                                                                            | PDHB, CHCHD5, MDH2, COX41                                                                                        |
| GO:0051704 | multi-organism process                    | 16 | 2514 | 0.49 | 6.10E-04 | 9606. ENSP00000254950, 9606. ENSP00000257570, 9606. ENSP00000262746, 9606. ENSP00000264346, 9606. ENSP00000306565, 9606. ENSP00000333657, 9606. ENSP00000354394, 9606. ENSP00000359787, 9606. ENSP00000360891, 9606. ENSP00000368699, 9606. ENSP00000377344, 9606. ENSP00000379182, 9606. ENSP00000381601, 9606. ENSP00000395590, 9606. ENSP00000399168, 9606. ENSP00000432305                        | VPS4A, OASL, PRDX1, HERC6, ISG20, MX2, STAT1, IFI44L, IFIT2, ISG15, DDX60, RAE1, MX1, IFI35, HLA-B, SPA17        |

|            |                                                                         |    |      |      |          |                                                                                                                                                                                                                                                                                                                                          |                                                                                       |
|------------|-------------------------------------------------------------------------|----|------|------|----------|------------------------------------------------------------------------------------------------------------------------------------------------------------------------------------------------------------------------------------------------------------------------------------------------------------------------------------------|---------------------------------------------------------------------------------------|
| GO:0002376 | immune system process                                                   | 15 | 2370 | 0.49 | 1.20E-03 | 9606. ENSP00000257570,9606. ENSP00000262746,9606. ENSP00000264346,9606. ENSP00000265016,9606. ENSP00000306565,9606. ENSP0000333657,9606. ENSP00000354394,9606. ENSP00000354468,9606. ENSP00000359787,9606. ENSP00000360891,9606. ENSP00000368699,9606. ENSP00000377344,9606. ENSP00000381601,9606. ENSP00000395590,9606. ENSP00000399168 | OASL,PRDX1,HERC6,BST1,ISG20,MX2,STAT1,CYB5R3,IFI44L,IFIT2,ISG15,DDX60,MX1,IFI35,HLA-B |
| GO:0016999 | antibiotic metabolic process                                            | 4  | 124  | 1.2  | 4.40E-03 | 9606. ENSP00000262746,9606. ENSP00000307241,9606. ENSP00000327070,9606. ENSP00000352584                                                                                                                                                                                                                                                  | PRDX1,PDHB,MDH2,AKR1B10                                                               |
| GO:0003374 | dynamin family protein polymerization involved in mitochondrial fission | 2  | 7    | 2.15 | 4.70E-03 | 9606. ENSP00000333657,9606. ENSP00000381601                                                                                                                                                                                                                                                                                              | MX2,MX1                                                                               |
| GO:0072594 | establishment of protein localization to organelle                      | 6  | 396  | 0.87 | 4.70E-03 | 9606. ENSP00000199814,9606. ENSP00000223136,9606. ENSP00000254950,9606. ENSP00000315013,9606. ENSP00000379182,9606. ENSP00000397798                                                                                                                                                                                                      | RBM22,FIS1,VPS4A,CRAT,RAE1,RPL17                                                      |
| GO:0019852 | L-ascorbic acid metabolic process                                       | 2  | 11   | 1.95 | 9.10E-03 | 9606. ENSP00000354468,9606. ENSP00000361140                                                                                                                                                                                                                                                                                              | CYB5R3,AKR1A1                                                                         |
| GO:0009108 | coenzyme biosynthetic process                                           | 4  | 167  | 1.07 | 1.12E-02 | 9606. ENSP00000307241,9606. ENSP00000311984,9606. ENSP00000325618,9606. ENSP00000361140                                                                                                                                                                                                                                                  | PDHB,CARKD,PARP10,AKR1A1                                                              |
| GO:0060333 | interferon-gamma-mediated signaling pathway                             | 3  | 69   | 1.33 | 1.16E-02 | 9606. ENSP00000257570,9606. ENSP00000354394,9606. ENSP00000399168                                                                                                                                                                                                                                                                        | OASL,STAT1,HLA-B                                                                      |
| GO:0061025 | membrane fusion                                                         | 4  | 170  | 1.06 | 1.16E-02 | 9606. ENSP00000223136,9606. ENSP00000254950,9606. ENSP00000333657,9606. ENSP00000381601                                                                                                                                                                                                                                                  | FIS1,VPS4A,MX2,MX1                                                                    |
| GO:0034356 | NAD biosynthesis via nicotinamide riboside salvage pathway              | 2  | 15   | 1.81 | 1.42E-02 | 9606. ENSP00000311984,9606. ENSP00000325618                                                                                                                                                                                                                                                                                              | CARKD,PARP10                                                                          |
| GO:0070887 | cellular response to chemical stimulus                                  | 14 | 2672 | 0.41 | 1.43E-02 | 9606. ENSP00000199814,9606. ENSP00000223136,9606. ENSP00000257570,9606. ENSP00000262746,9606. ENSP00000306565,9606. ENSP00000333657,9606. ENSP00000354394,9606. ENSP00000360891,9606. ENSP00000368699,9606. ENSP00000379182,9606. ENSP00000381601,9606. ENSP00000395590,9606. ENSP00000399168,9606. ENSP00000480826                      | RBM22,FIS1,OASL,PRDX1,ISG20,MX2,STAT1,IFIT2,ISG15,RAE1,MX1,IFI35,HLA-B,HIST1H3A       |
| GO:0006767 | water-soluble vitamin metabolic process                                 | 3  | 81   | 1.26 | 1.68E-02 | 9606. ENSP00000265594,9606. ENSP00000354468,9606. ENSP00000361140                                                                                                                                                                                                                                                                        | MCCC1,CYB5R3,AKR1A1                                                                   |
| GO:0044281 | small molecule metabolic process                                        | 11 | 1779 | 0.48 | 1.68E-02 | 9606. ENSP00000265016,9606. ENSP00000265594,9606. ENSP00000307241,9606. ENSP00000311984,9606. ENSP00000315013,9606. ENSP00000325618,9606. ENSP00000327070,9606. ENSP00000352584,9606. ENSP00000354468,9606. ENSP00000361140,9606. ENSP00000457513                                                                                        | BST1,MCCC1,PDHB,CARKD,CRAT,PARP10,MDH2,AKR1B10,CYB5R3,AKR1A1,COX4I1                   |
| GO:0005996 | monosaccharide metabolic process                                        | 4  | 198  | 0.99 | 1.81E-02 | 9606. ENSP00000307241,9606. ENSP00000327070,9606. ENSP00000354468,9606. ENSP00000361140                                                                                                                                                                                                                                                  | PDHB,MDH2,CYB5R3,AKR1A1                                                               |
| GO:0009117 | nucleotide metabolic process                                            | 6  | 576  | 0.71 | 2.49E-02 | 9606. ENSP00000265016,9606. ENSP00000307241,9606. ENSP00000311984,9606. ENSP00000325618,9606. ENSP00000327070,9606. ENSP00000457513                                                                                                                                                                                                      | BST1,PDHB,CARKD,PARP10,MDH2,COX4I1                                                    |
| GO:0035455 | response to interferon-alpha                                            | 2  | 22   | 1.65 | 2.49E-02 | 9606. ENSP00000333657,9606. ENSP00000360891                                                                                                                                                                                                                                                                                              | MX2,IFIT2                                                                             |
| GO:0051188 | cofactor biosynthetic process                                           | 4  | 218  | 0.95 | 2.49E-02 | 9606. ENSP00000307241,9606. ENSP00000311984,9606. ENSP00000325618,9606. ENSP00000361140                                                                                                                                                                                                                                                  | PDHB,CARKD,PARP10,AKR1A1                                                              |
| GO:0071310 | cellular response to organic substance                                  | 12 | 2219 | 0.42 | 2.62E-02 | 9606. ENSP00000223136,9606. ENSP00000257570,9606. ENSP00000306565,9606. ENSP00000333657,9606. ENSP00000354394,9606. ENSP00000360891,9606. ENSP00000368699,9606. ENSP00000379182,9606. ENSP00000381601,9606. ENSP00000395590,9606. ENSP00000399168,9606. ENSP00000480826                                                                  | FIS1,OASL,ISG20,MX2,STAT1,IFIT2,ISG15,RAE1,MX1,IFI35,HLA-B,HIST1H3A                   |
| GO:0006091 | generation of precursor metabolites and energy                          | 5  | 400  | 0.79 | 2.85E-02 | 9606. ENSP00000307241,9606. ENSP00000325655,9606. ENSP00000327070,9606. ENSP00000361140,9606. ENSP00000457513                                                                                                                                                                                                                            | PDHB,CHCHD5,MDH2,AKR1A1,COX4I1                                                        |

|            |                                                    |    |      |      |          |                                                                                                                                                                                                                                                                                                                                                                      |                                                                                                    |
|------------|----------------------------------------------------|----|------|------|----------|----------------------------------------------------------------------------------------------------------------------------------------------------------------------------------------------------------------------------------------------------------------------------------------------------------------------------------------------------------------------|----------------------------------------------------------------------------------------------------|
| GO:0044248 | cellular catabolic process                         | 10 | 1646 | 0.47 | 3.05E-02 | 9606.ENSP00000223136,9606.ENSP00000254950,9606.ENSP00000262746,9606.ENSP00000265594,9606.ENSP00000306565,9606.ENSP0000315013,9606.ENSP00000352584,9606.ENSP00000361140,9606.ENSP00000368699,9606.ENSP00000397798                                                                                                                                                     | FIS1,VPS4A,PRDX1,MCCC1,ISG20,CRAT,AKR1B10,AKR1A1,ISG15,RPL17                                       |
| GO:0017144 | drug metabolic process                             | 6  | 622  | 0.67 | 3.32E-02 | 9606.ENSP00000262746,9606.ENSP00000265594,9606.ENSP00000307241,9606.ENSP00000327070,9606.ENSP00000352584,9606.ENSP0000457513                                                                                                                                                                                                                                         | PRDX1,MCCC1,PDHB,MDH2,AKR1B10,COX4I1                                                               |
| GO:0006006 | glucose metabolic process                          | 3  | 113  | 1.11 | 3.47E-02 | 9606.ENSP00000307241,9606.ENSP00000327070,9606.ENSP00000361140                                                                                                                                                                                                                                                                                                       | PDHB,MDH2,AKR1A1                                                                                   |
| GO:0045648 | positive regulation of erythrocyte differentiation | 2  | 29   | 1.53 | 3.65E-02 | 9606.ENSP00000354394,9606.ENSP00000368699                                                                                                                                                                                                                                                                                                                            | STAT1,ISG15                                                                                        |
| GO:0042221 | response to chemical                               | 17 | 4153 | 0.3  | 3.86E-02 | 9606.ENSP00000199814,9606.ENSP00000223136,9606.ENSP00000257570,9606.ENSP00000262746,9606.ENSP00000264108,9606.ENSP00000306565,9606.ENSP00000317790,9606.ENSP00000333657,9606.ENSP00000354394,9606.ENSP00000360891,9606.ENSP00000368699,9606.ENSP00000379182,9606.ENSP00000381601,9606.ENSP00000395590,9606.ENSP00000399168,9606.ENSP00000457513,9606.ENSP00000480826 | RBM22,FIS1,OASL,PRDX1,HAT1,ISG20,SPTBN5,MX2,STAT1,IFIT2,ISG15,RAE1,MX1,IFI35,HLA-B,COX4I1,HIST1H3A |
| GO:0006099 | tricarboxylic acid cycle                           | 2  | 32   | 1.49 | 4.13E-02 | 9606.ENSP00000307241,9606.ENSP00000327070                                                                                                                                                                                                                                                                                                                            | PDHB,MDH2                                                                                          |
| GO:0006335 | DNA replication-dependent nucleosome assembly      | 2  | 32   | 1.49 | 4.13E-02 | 9606.ENSP00000264108,9606.ENSP00000480826                                                                                                                                                                                                                                                                                                                            | HAT1,HIST1H3A                                                                                      |
| GO:0043933 | protein-containing complex subunit organization    | 10 | 1770 | 0.44 | 4.44E-02 | 9606.ENSP00000199814,9606.ENSP00000223136,9606.ENSP00000254950,9606.ENSP00000264108,9606.ENSP00000265594,9606.ENSP00000317790,9606.ENSP00000333657,9606.ENSP00000381601,9606.ENSP00000392617,9606.ENSP00000480826                                                                                                                                                    | RBM22,FIS1,VPS4A,HAT1,MCCC1,SPTBN5,MX2,MX1,SMARCD2,HIST1H3A                                        |
| GO:0006101 | citrate metabolic process                          | 2  | 36   | 1.43 | 4.79E-02 | 9606.ENSP00000307241,9606.ENSP00000327070                                                                                                                                                                                                                                                                                                                            | PDHB,MDH2                                                                                          |



T = 72 h (CoV-2), IFN $\alpha$ 5 / Untreated

| #Term ID   | Term Description                              | Observed Gene Count | Background Gene Count | Strength | False Discovery Rate | Matching Proteins in Your Input (IDs)                                                                                                                                                                                                                                                                                                                                                                                                                                                                                                                             | Matching Proteins in Your Input (Labels)                                                                                                                   |
|------------|-----------------------------------------------|---------------------|-----------------------|----------|----------------------|-------------------------------------------------------------------------------------------------------------------------------------------------------------------------------------------------------------------------------------------------------------------------------------------------------------------------------------------------------------------------------------------------------------------------------------------------------------------------------------------------------------------------------------------------------------------|------------------------------------------------------------------------------------------------------------------------------------------------------------|
| GO:0034340 | response to type I interferon                 | 17                  | 70                    | 1.84     | 1.33E-22             | 9606.ENSP00000228928,9606.ENSP00000253110,9606.ENSP00000257570,9606.ENSP00000315768,9606.ENSP00000333657,9606.ENSP00000343023,9606.ENSP00000354394,9606.ENSP00000357459,9606.ENSP00000360869,9606.ENSP00000360883,9606.ENSP00000365402,9606.ENSP00000379873,9606.ENSP00000381601,9606.ENSP00000382707,9606.ENSP00000388001,9606.ENSP00000395590,9606.ENSP00000399168                                                                                                                                                                                              | OAS3,C19orf66,OASL,STAT2,MX2,SP100,STAT1,ADAR,IFIT1,IFIT3,HLA-C,HLA-A,MX1,IFITM3,OAS1,IFI35,HLA-B                                                          |
| GO:0060337 | type I interferon signaling pathway           | 16                  | 65                    | 1.85     | 1.72E-21             | 9606.ENSP00000228928,9606.ENSP00000257570,9606.ENSP00000315768,9606.ENSP00000333657,9606.ENSP00000343023,9606.ENSP00000354394,9606.ENSP00000357459,9606.ENSP00000360869,9606.ENSP00000360883,9606.ENSP00000365402,9606.ENSP00000379873,9606.ENSP00000381601,9606.ENSP00000382707,9606.ENSP00000388001,9606.ENSP00000395590,9606.ENSP00000399168                                                                                                                                                                                                                   | OAS3,OASL,STAT2,MX2,SP100,STAT1,ADAR,IFIT1,IFIT3,HLA-C,HLA-A,MX1,IFITM3,OAS1,IFI35,HLA-B                                                                   |
| GO:0045087 | innate immune response                        | 26                  | 676                   | 1.04     | 7.78E-18             | 9606.ENSP00000228928,9606.ENSP00000233057,9606.ENSP00000243253,9606.ENSP00000253110,9606.ENSP00000257570,9606.ENSP00000268058,9606.ENSP00000315768,9606.ENSP00000333657,9606.ENSP00000343023,9606.ENSP00000354394,9606.ENSP00000357459,9606.ENSP00000359490,9606.ENSP00000360869,9606.ENSP00000360883,9606.ENSP00000365402,9606.ENSP00000369299,9606.ENSP00000378856,9606.ENSP00000379873,9606.ENSP00000381601,9606.ENSP00000382707,9606.ENSP00000388001,9606.ENSP00000395590,9606.ENSP00000398632,9606.ENSP00000399168,9606.ENSP00000418194,9606.ENSP00000433138 | OAS3,EIF2AK2,SEC61A1,C19orf66,OASL,PML,STAT2,MX2,SP100,STAT1,ADAR,GBP4,IFIT1,IFIT3,HLA-C,TRIM22,LGALS9,HLA-A,MX1,IFITM3,OAS1,IFI35,CD44,HLA-B,PARP14,CASP1 |
| GO:0043901 | negative regulation of multi-organism process | 18                  | 212                   | 1.39     | 2.53E-17             | 9606.ENSP00000228928,9606.ENSP00000233057,9606.ENSP00000253110,9606.ENSP00000257570,9606.ENSP00000268058,9606.ENSP00000315768,9606.ENSP00000333657,9606.ENSP00000343023,9606.ENSP00000354394,9606.ENSP00000357459,9606.ENSP00000360869,9606.ENSP00000374455,9606.ENSP00000378856,9606.ENSP00000379873,9606.ENSP00000381601,9606.ENSP00000382707,9606.ENSP00000388001,9606.ENSP00000399168,9606.ENSP00000418194                                                                                                                                                    | OAS3,EIF2AK2,C19orf66,OASL,PML,PARP10,SP100,STAT1,ADAR,IFIT1,SQSTM1,LGALS9,HLA-A,MX1,IFITM3,OAS1,HLA-B,PARP14                                              |
| GO:0034341 | response to interferon-gamma                  | 17                  | 176                   | 1.44     | 3.35E-17             | 9606.ENSP00000228928,9606.ENSP00000243253,9606.ENSP00000253110,9606.ENSP00000257570,9606.ENSP00000268058,9606.ENSP00000315768,9606.ENSP00000333657,9606.ENSP00000343023,9606.ENSP00000354394,9606.ENSP00000359490,9606.ENSP00000365402,9606.ENSP00000369299,9606.ENSP00000378856,9606.ENSP00000379873,9606.ENSP00000382707,9606.ENSP00000388001,9606.ENSP00000398632,9606.ENSP00000399168,9606.ENSP00000433138                                                                                                                                                    | OAS3,SEC61A1,C19orf66,OASL,PML,SP100,STAT1,GBP4,HLA-C,TRIM22,LGALS9,HLA-A,IFITM3,OAS1,CD44,HLA-B,CASP1                                                     |

|            |                                    |    |      |      |          |                                                                                                                                                                                                                                                                                                                                                                                                                                                                                                                                                                                                                                  |                                                                                                                                                                                  |
|------------|------------------------------------|----|------|------|----------|----------------------------------------------------------------------------------------------------------------------------------------------------------------------------------------------------------------------------------------------------------------------------------------------------------------------------------------------------------------------------------------------------------------------------------------------------------------------------------------------------------------------------------------------------------------------------------------------------------------------------------|----------------------------------------------------------------------------------------------------------------------------------------------------------------------------------|
| GO:0098542 | defense response to other organism | 27 | 859  | 0.96 | 1.00E-16 | 9606.ENSP00000228928,9606.ENSP00000233057,9606.ENSP00000243253,9606.ENSP00000253110,9606.ENSP00000257570,9606.ENSP0000268058,9606.ENSP00000315768,9606.ENSP00000333657,9606.ENSP00000343023,9606.ENSP00000354394,9606.ENSP00000357459,9606.ENSP00000359490,9606.ENSP00000359787,9606.ENSP00000360869,9606.ENSP00000360883,9606.ENSP00000365402,9606.ENSP00000369299,9606.ENSP00000378856,9606.ENSP00000379873,9606.ENSP00000381601,9606.ENSP00000382707,9606.ENSP00000388001,9606.ENSP00000395590,9606.ENSP00000398632,9606.ENSP00000399168,9606.ENSP00000418194,9606.ENSP00000433138                                            | OAS3,EIF2AK2,SEC61A1,C19orf66,OASL,PML,STAT2,MX2,SP100,STAT1,ADAR,GBP4,IFI44L,IFIT1,IFIT3,HLA-C,TRIM22,LGALS9,HLA-A,MX1,IFITM3,OAS1,IFI35,CD44,HLA-B,PARP14,CASP1                |
| GO:0009615 | response to virus                  | 18 | 270  | 1.28 | 9.06E-16 | 9606.ENSP00000228928,9606.ENSP00000233057,9606.ENSP00000253110,9606.ENSP00000257570,9606.ENSP00000268058,9606.ENSP00000315768,9606.ENSP00000333657,9606.ENSP00000354394,9606.ENSP00000357459,9606.ENSP00000359783,9606.ENSP00000359787,9606.ENSP00000360869,9606.ENSP00000360883,9606.ENSP00000369299,9606.ENSP00000378856,9606.ENSP00000381601,9606.ENSP00000382707,9606.ENSP00000388001                                                                                                                                                                                                                                        | OAS3,EIF2AK2,C19orf66,OASL,PML,STAT2,MX2,STAT1,ADAR,IFI44L,IFI44L,IFIT1,IFIT3,TRIM22,LGALS9,MX1,IFITM3,OAS1                                                                      |
| GO:0051607 | defense response to virus          | 16 | 181  | 1.41 | 1.12E-15 | 9606.ENSP00000228928,9606.ENSP00000233057,9606.ENSP00000253110,9606.ENSP00000257570,9606.ENSP00000268058,9606.ENSP00000315768,9606.ENSP00000333657,9606.ENSP00000354394,9606.ENSP00000357459,9606.ENSP00000359787,9606.ENSP00000360869,9606.ENSP00000360883,9606.ENSP00000369299,9606.ENSP00000381601,9606.ENSP00000382707,9606.ENSP00000388001                                                                                                                                                                                                                                                                                  | OAS3,EIF2AK2,C19orf66,OASL,PML,STAT2,MX2,STAT1,ADAR,IFI44L,IFIT1,IFIT3,TRIM22,MX1,IFITM3,OAS1                                                                                    |
| GO:0051707 | response to other organism         | 29 | 1173 | 0.85 | 1.23E-15 | 9606.ENSP00000228928,9606.ENSP00000233057,9606.ENSP00000243253,9606.ENSP00000253110,9606.ENSP00000256722,9606.ENSP00000257570,9606.ENSP00000268058,9606.ENSP00000315768,9606.ENSP00000333657,9606.ENSP00000343023,9606.ENSP00000354394,9606.ENSP00000357459,9606.ENSP00000359490,9606.ENSP00000359783,9606.ENSP00000359787,9606.ENSP00000360869,9606.ENSP00000360883,9606.ENSP00000365402,9606.ENSP00000369299,9606.ENSP00000378856,9606.ENSP00000379873,9606.ENSP00000381601,9606.ENSP00000382707,9606.ENSP00000388001,9606.ENSP00000395590,9606.ENSP00000398632,9606.ENSP00000399168,9606.ENSP00000418194,9606.ENSP00000433138 | OAS3,EIF2AK2,SEC61A1,C19orf66,CMPK2,OASL,PML,STAT2,MX2,SP100,STAT1,ADAR,GBP4,IFI44,IFI44L,IFIT1,IFIT3,HLA-C,TRIM22,LGALS9,HLA-A,MX1,IFITM3,OAS1,IFI35,CD44,HLA-B,PARP14,CASP1    |
| GO:0006952 | defense response                   | 29 | 1234 | 0.83 | 3.55E-15 | 9606.ENSP00000228928,9606.ENSP00000233057,9606.ENSP00000243253,9606.ENSP00000249066,9606.ENSP00000253110,9606.ENSP00000257570,9606.ENSP00000262776,9606.ENSP00000268058,9606.ENSP00000315768,9606.ENSP00000333657,9606.ENSP00000343023,9606.ENSP00000354394,9606.ENSP00000357459,9606.ENSP00000359490,9606.ENSP00000359787,9606.ENSP00000360869,9606.ENSP00000360883,9606.ENSP00000365402,9606.ENSP00000369299,9606.ENSP00000378856,9606.ENSP00000379873,9606.ENSP00000381601,9606.ENSP00000382707,9606.ENSP00000388001,9606.ENSP00000395590,9606.ENSP00000398632,9606.ENSP00000399168,9606.ENSP00000418194,9606.ENSP00000433138 | OAS3,EIF2AK2,SEC61A1,APOL2,C19orf66,OASL,LGALS3BP,PML,STAT2,MX2,SP100,STAT1,ADAR,GBP4,IFI44L,IFIT1,IFIT3,HLA-C,TRIM22,LGALS9,HLA-A,MX1,IFITM3,OAS1,IFI35,CD44,HLA-B,PARP14,CASP1 |

|            |                                                                    |    |      |      |          |                                                                                                                                                                                                                                                                                                                                                                                                                                                                                                                                                                                       |                                                                                                                                                                  |
|------------|--------------------------------------------------------------------|----|------|------|----------|---------------------------------------------------------------------------------------------------------------------------------------------------------------------------------------------------------------------------------------------------------------------------------------------------------------------------------------------------------------------------------------------------------------------------------------------------------------------------------------------------------------------------------------------------------------------------------------|------------------------------------------------------------------------------------------------------------------------------------------------------------------|
| GO:0034097 | response to cytokine                                               | 27 | 1035 | 0.88 | 4.92E-15 | 9606.ENSP00000228928,9606.ENSP00000233057,9606.ENSP00000243253,9606.ENSP00000253110,9606.ENSP00000257570,9606.ENSP0000268058,9606.ENSP00000315768,9606.ENSP00000317997,9606.ENSP00000333657,9606.ENSP00000343023,9606.ENSP00000354394,9606.ENSP00000357459,9606.ENSP00000359490,9606.ENSP00000360869,9606.ENSP00000360883,9606.ENSP00000365402,9606.ENSP00000369299,9606.ENSP00000374455,9606.ENSP00000378856,9606.ENSP00000379873,9606.ENSP00000381601,9606.ENSP00000382707,9606.ENSP00000388001,9606.ENSP00000395590,9606.ENSP00000398632,9606.ENSP00000399168,9606.ENSP00000433138 | OAS3,EIF2AK2,SEC61A1,C19orf66,OASL,PML,STAT2,DUOX1,MX2,SP100,STAT1,ADAR,GBP4,IFIT1,IFIT3,HLA-C,TRIM22,SQSTM1,LGALS9,HLA-A,MX1,IFITM3,OAS1,IFI35,CD44,HLA-B,CASP1 |
| GO:0048525 | negative regulation of viral process                               | 13 | 93   | 1.6  | 4.92E-15 | 9606.ENSP00000228928,9606.ENSP00000233057,9606.ENSP00000253110,9606.ENSP00000257570,9606.ENSP00000268058,9606.ENSP00000325618,9606.ENSP00000343023,9606.ENSP00000354394,9606.ENSP00000357459,9606.ENSP00000360869,9606.ENSP00000381601,9606.ENSP00000382707,9606.ENSP00000388001                                                                                                                                                                                                                                                                                                      | OAS3,EIF2AK2,C19orf66,OASL,PML,PARP10,SP100,STAT1,ADAR,IFIT1,MX1,IFITM3,OAS1                                                                                     |
| GO:0019221 | cytokine-mediated signaling pathway                                | 22 | 655  | 0.99 | 5.13E-14 | 9606.ENSP00000228928,9606.ENSP00000257570,9606.ENSP00000268058,9606.ENSP00000315768,9606.ENSP00000317997,9606.ENSP00000333657,9606.ENSP00000343023,9606.ENSP00000354394,9606.ENSP00000357459,9606.ENSP00000360869,9606.ENSP00000360883,9606.ENSP00000365402,9606.ENSP00000369299,9606.ENSP00000374455,9606.ENSP00000379873,9606.ENSP00000381601,9606.ENSP00000382707,9606.ENSP00000388001,9606.ENSP00000395590,9606.ENSP00000398632,9606.ENSP00000399168,9606.ENSP00000433138                                                                                                         | OAS3,OASL,PML,STAT2,DUOX1,MX2,SP100,STAT1,ADAR,IFIT1,IFIT3,HLA-C,TRIM22,SQSTM1,HLA-A,MX1,IFITM3,OAS1,IFI35,CD44,HLA-B,CASP1                                      |
| GO:0071346 | cellular response to interferon-gamma                              | 14 | 155  | 1.41 | 6.52E-14 | 9606.ENSP00000228928,9606.ENSP00000257570,9606.ENSP00000268058,9606.ENSP00000343023,9606.ENSP00000354394,9606.ENSP00000359490,9606.ENSP00000365402,9606.ENSP00000369299,9606.ENSP00000378856,9606.ENSP00000379873,9606.ENSP00000388001,9606.ENSP00000398632,9606.ENSP00000399168,9606.ENSP00000433138                                                                                                                                                                                                                                                                                 | OAS3,OASL,PML,SP100,STAT1,GBP4,HLA-C,TRIM22,LGALS9,HLA-A,OAS1,CD44,HLA-B,CASP1                                                                                   |
| GO:0043903 | regulation of symbiosis, encompassing mutualism through parasitism | 15 | 203  | 1.33 | 8.22E-14 | 9606.ENSP00000228928,9606.ENSP00000233057,9606.ENSP00000253110,9606.ENSP00000257570,9606.ENSP00000268058,9606.ENSP00000325618,9606.ENSP00000343023,9606.ENSP00000354394,9606.ENSP00000357459,9606.ENSP00000360869,9606.ENSP00000374455,9606.ENSP00000378856,9606.ENSP00000381601,9606.ENSP00000382707,9606.ENSP00000388001                                                                                                                                                                                                                                                            | OAS3,EIF2AK2,C19orf66,OASL,PML,PARP10,SP100,STAT1,ADAR,IFIT1,SQSTM1,LGALS9,MX1,IFITM3,OAS1                                                                       |
| GO:0050792 | regulation of viral process                                        | 14 | 174  | 1.36 | 2.61E-13 | 9606.ENSP00000228928,9606.ENSP00000233057,9606.ENSP00000253110,9606.ENSP00000257570,9606.ENSP00000268058,9606.ENSP00000325618,9606.ENSP00000343023,9606.ENSP00000354394,9606.ENSP00000357459,9606.ENSP00000360869,9606.ENSP00000378856,9606.ENSP00000381601,9606.ENSP00000382707,9606.ENSP00000388001                                                                                                                                                                                                                                                                                 | OAS3,EIF2AK2,C19orf66,OASL,PML,PARP10,SP100,STAT1,ADAR,IFIT1,LGALS9,MX1,IFITM3,OAS1                                                                              |
| GO:0060333 | interferon-gamma-mediated signaling pathway                        | 11 | 69   | 1.66 | 3.03E-13 | 9606.ENSP00000228928,9606.ENSP00000257570,9606.ENSP00000268058,9606.ENSP00000343023,9606.ENSP00000354394,9606.ENSP00000365402,9606.ENSP00000369299,9606.ENSP00000379873,9606.ENSP00000388001,9606.ENSP00000398632,9606.ENSP00000399168                                                                                                                                                                                                                                                                                                                                                | OAS3,OASL,PML,SP100,STAT1,HLA-C,TRIM22,HLA-A,OAS1,CD44,HLA-B                                                                                                     |

|            |                                                 |    |      |      |          |                                                                                                                                                                                                                                                                                                                                                                                                                                                                                                                                                                                                                                                                                                                                                                                                                                                            |                                                                                                                                                                                                                                                             |
|------------|-------------------------------------------------|----|------|------|----------|------------------------------------------------------------------------------------------------------------------------------------------------------------------------------------------------------------------------------------------------------------------------------------------------------------------------------------------------------------------------------------------------------------------------------------------------------------------------------------------------------------------------------------------------------------------------------------------------------------------------------------------------------------------------------------------------------------------------------------------------------------------------------------------------------------------------------------------------------------|-------------------------------------------------------------------------------------------------------------------------------------------------------------------------------------------------------------------------------------------------------------|
| GO:0051704 | multi-organism process                          | 36 | 2514 | 0.61 | 3.17E-13 | 9606. ENSP00000228928, 9606. ENSP00000233057, 9606. ENSP00000243253, 9606. ENSP00000249066, 9606. ENSP00000253110, 9606. ENSP00000256722, 9606. ENSP00000257570, 9606. ENSP00000264705, 9606. ENSP00000268058, 9606. ENSP00000270586, 9606. ENSP00000295666, 9606. ENSP00000315768, 9606. ENSP00000320485, 9606. ENSP00000333657, 9606. ENSP00000343023, 9606. ENSP00000354394, 9606. ENSP00000355325, 9606. ENSP00000357459, 9606. ENSP00000359490, 9606. ENSP00000359783, 9606. ENSP00000359787, 9606. ENSP00000360869, 9606. ENSP00000360883, 9606. ENSP00000363993, 9606. ENSP00000365402, 9606. ENSP00000369299, 9606. ENSP00000378856, 9606. ENSP00000379873, 9606. ENSP00000381601, 9606. ENSP00000382707, 9606. ENSP00000388001, 9606. ENSP00000395590, 9606. ENSP00000398632, 9606. ENSP00000399168, 9606. ENSP00000418194, 9606. ENSP00000433138 | OAS3, EIF2AK2, SEC61A1, APOL2, C19orf66, CMPK2, OASL, CAD, PML, PSMB6, IGF1BP7, STAT2, ARID1A, MX2, SP100, STAT1, PSMB5, ADAR, GBP4, IFI44, IFI44L, IFIT1, IFIT3, PSMB9, HLA-C, TRIM22, LGALS9, HLA-A, MX1, IFITM3, OAS1, IFI35, CD44, HLA-B, PARP14, CASP1 |
| GO:0071345 | cellular response to cytokine stimulus          | 24 | 953  | 0.86 | 6.42E-13 | 9606. ENSP00000228928, 9606. ENSP00000257570, 9606. ENSP00000268058, 9606. ENSP00000315768, 9606. ENSP00000317997, 9606. ENSP00000333657, 9606. ENSP00000343023, 9606. ENSP00000354394, 9606. ENSP00000357459, 9606. ENSP00000359490, 9606. ENSP00000360869, 9606. ENSP00000360883, 9606. ENSP00000365402, 9606. ENSP00000369299, 9606. ENSP00000374455, 9606. ENSP00000378856, 9606. ENSP00000379873, 9606. ENSP00000381601, 9606. ENSP00000382707, 9606. ENSP00000388001, 9606. ENSP00000395590, 9606. ENSP00000398632, 9606. ENSP00000399168, 9606. ENSP00000433138                                                                                                                                                                                                                                                                                     | OAS3, OASL, PML, STAT2, DUOX1, MX2, SP100, STAT1, ADAR, GBP4, IFIT1, IFIT3, HLA-C, TRIM22, SQSTM1, LGALS9, HLA-A, MX1, IFITM3, OAS1, IFI35, CD44, HLA-B, CASP1                                                                                              |
| GO:1903901 | negative regulation of viral life cycle         | 11 | 77   | 1.61 | 7.88E-13 | 9606. ENSP00000228928, 9606. ENSP00000233057, 9606. ENSP00000253110, 9606. ENSP00000257570, 9606. ENSP00000268058, 9606. ENSP00000325618, 9606. ENSP00000357459, 9606. ENSP00000360869, 9606. ENSP00000381601, 9606. ENSP00000382707, 9606. ENSP00000388001                                                                                                                                                                                                                                                                                                                                                                                                                                                                                                                                                                                                | OAS3, EIF2AK2, C19orf66, OASL, PML, PARP10, ADAR, IFIT1, MX1, IFITM3, OAS1                                                                                                                                                                                  |
| GO:0045071 | negative regulation of viral genome replication | 10 | 52   | 1.74 | 9.16E-13 | 9606. ENSP00000228928, 9606. ENSP00000233057, 9606. ENSP00000253110, 9606. ENSP00000257570, 9606. ENSP00000325618, 9606. ENSP00000357459, 9606. ENSP00000360869, 9606. ENSP00000381601, 9606. ENSP00000382707, 9606. ENSP00000388001                                                                                                                                                                                                                                                                                                                                                                                                                                                                                                                                                                                                                       | OAS3, EIF2AK2, C19orf66, OASL, PARP10, ADAR, IFIT1, MX1, IFITM3, OAS1                                                                                                                                                                                       |
| GO:0009605 | response to external stimulus                   | 33 | 2152 | 0.64 | 1.12E-12 | 9606. ENSP00000228928, 9606. ENSP00000233057, 9606. ENSP00000243253, 9606. ENSP00000252809, 9606. ENSP00000253110, 9606. ENSP00000256722, 9606. ENSP00000257570, 9606. ENSP00000264705, 9606. ENSP00000268058, 9606. ENSP00000315768, 9606. ENSP00000333657, 9606. ENSP00000343023, 9606. ENSP00000354394, 9606. ENSP00000357459, 9606. ENSP00000359490, 9606. ENSP00000359783, 9606. ENSP00000359787, 9606. ENSP00000360869, 9606. ENSP00000360883, 9606. ENSP00000365402, 9606. ENSP00000369299, 9606. ENSP00000378856, 9606. ENSP00000379038, 9606. ENSP00000379873, 9606. ENSP00000381601, 9606. ENSP00000382707, 9606. ENSP00000388001, 9606. ENSP00000395590, 9606. ENSP00000398632, 9606. ENSP00000399168, 9606. ENSP00000418194, 9606. ENSP00000433138, 9606. ENSP00000457513                                                                      | OAS3, EIF2AK2, SEC61A1, GDF15, C19orf66, CMPK2, OASL, CAD, PML, STAT2, MX2, SP100, STAT1, ADAR, GBP4, IFI44, IFI44L, IFIT1, IFIT3, HLA-C, TRIM22, LGALS9, TYMP, HLA-A, MX1, IFITM3, OAS1, IFI35, CD44, HLA-B, PARP14, CASP1, COX411                         |
| GO:1903900 | regulation of viral life cycle                  | 12 | 135  | 1.41 | 7.29E-12 | 9606. ENSP00000228928, 9606. ENSP00000233057, 9606. ENSP00000253110, 9606. ENSP00000257570, 9606. ENSP00000268058, 9606. ENSP00000325618, 9606. ENSP00000357459, 9606. ENSP00000360869, 9606. ENSP00000378856, 9606. ENSP00000381601, 9606. ENSP00000382707, 9606. ENSP00000388001                                                                                                                                                                                                                                                                                                                                                                                                                                                                                                                                                                         | OAS3, EIF2AK2, C19orf66, OASL, PML, PARP10, ADAR, IFIT1, LGALS9, MX1, IFITM3, OAS1                                                                                                                                                                          |

|            |                                        |    |      |      |          |                                                                                                                                                                                                                                                                                                                                                                                                                                                                                                                                                                                                                                                                                                                                                                                                              |                                                                                                                                                                                                                                                  |
|------------|----------------------------------------|----|------|------|----------|--------------------------------------------------------------------------------------------------------------------------------------------------------------------------------------------------------------------------------------------------------------------------------------------------------------------------------------------------------------------------------------------------------------------------------------------------------------------------------------------------------------------------------------------------------------------------------------------------------------------------------------------------------------------------------------------------------------------------------------------------------------------------------------------------------------|--------------------------------------------------------------------------------------------------------------------------------------------------------------------------------------------------------------------------------------------------|
| GO:0071310 | cellular response to organic substance | 31 | 2219 | 0.6  | 1.15E-10 | 9606. ENSP00000228928, 9606. ENSP00000233057, 9606. ENSP00000252809, 9606. ENSP00000256722, 9606. ENSP00000257570, 9606. ENSP00000264705, 9606. ENSP00000268058, 9606. ENSP00000295666, 9606. ENSP00000315768, 9606. ENSP00000317997, 9606. ENSP00000320485, 9606. ENSP00000333657, 9606. ENSP00000343023, 9606. ENSP00000354394, 9606. ENSP00000357459, 9606. ENSP00000359490, 9606. ENSP00000360869, 9606. ENSP00000360883, 9606. ENSP00000365402, 9606. ENSP00000368678, 9606. ENSP00000369299, 9606. ENSP00000374455, 9606. ENSP00000378856, 9606. ENSP00000379873, 9606. ENSP00000381601, 9606. ENSP00000382707, 9606. ENSP00000388001, 9606. ENSP00000395590, 9606. ENSP00000398632, 9606. ENSP00000399168, 9606. ENSP00000433138                                                                      | OAS3, EIF2AK2, GDF15, CMPK2, OASL, CAD, PML, IGF1BP7, STAT2, DUOX1, ARID1A, MX2, SP100, STAT1, ADAR, GBP4, IFIT1, IFIT3, HLA-C, AGRN, TRIM22, SQSTM1, LGALS9, HLA-A, MX1, IFITM3, OAS1, IFI35, CD44, HLA-B, CASP1                                |
| GO:0010033 | response to organic substance          | 33 | 2815 | 0.53 | 1.63E-09 | 9606. ENSP00000228928, 9606. ENSP00000233057, 9606. ENSP00000243253, 9606. ENSP00000252809, 9606. ENSP00000253110, 9606. ENSP00000256722, 9606. ENSP00000257570, 9606. ENSP00000264705, 9606. ENSP00000268058, 9606. ENSP00000295666, 9606. ENSP00000315768, 9606. ENSP00000317997, 9606. ENSP00000320485, 9606. ENSP00000333657, 9606. ENSP00000343023, 9606. ENSP00000354394, 9606. ENSP00000357459, 9606. ENSP00000359490, 9606. ENSP00000360869, 9606. ENSP00000360883, 9606. ENSP00000365402, 9606. ENSP00000368678, 9606. ENSP00000369299, 9606. ENSP00000374455, 9606. ENSP00000378856, 9606. ENSP00000379873, 9606. ENSP00000381601, 9606. ENSP00000382707, 9606. ENSP00000388001, 9606. ENSP00000395590, 9606. ENSP00000398632, 9606. ENSP00000399168, 9606. ENSP00000433138                        | OAS3, EIF2AK2, SEC61A1, GDF15, C19orf66, CMPK2, OASL, CAD, PML, IGF1BP7, STAT2, DUOX1, ARID1A, MX2, SP100, STAT1, ADAR, GBP4, IFIT1, IFIT3, HLA-C, AGRN, TRIM22, SQSTM1, LGALS9, HLA-A, MX1, IFITM3, OAS1, IFI35, CD44, HLA-B, CASP1             |
| GO:0002252 | immune effector process                | 20 | 927  | 0.79 | 2.05E-09 | 9606. ENSP00000228928, 9606. ENSP00000233057, 9606. ENSP00000253110, 9606. ENSP00000257570, 9606. ENSP00000268058, 9606. ENSP00000315768, 9606. ENSP00000333657, 9606. ENSP00000354394, 9606. ENSP00000357459, 9606. ENSP00000359787, 9606. ENSP00000360869, 9606. ENSP00000360883, 9606. ENSP00000365402, 9606. ENSP00000369299, 9606. ENSP00000379873, 9606. ENSP00000381601, 9606. ENSP00000382707, 9606. ENSP00000388001, 9606. ENSP00000398632, 9606. ENSP00000399168                                                                                                                                                                                                                                                                                                                                   | OAS3, EIF2AK2, C19orf66, OASL, PML, STAT2, MX2, STAT1, ADAR, IFI44L, IFIT1, IFIT3, HLA-C, TRIM22, HLA-A, MX1, IFITM3, OAS1, CD44, HLA-B                                                                                                          |
| GO:0006950 | response to stress                     | 34 | 3267 | 0.48 | 1.61E-08 | 9606. ENSP00000228928, 9606. ENSP00000233057, 9606. ENSP00000243253, 9606. ENSP00000249066, 9606. ENSP00000253110, 9606. ENSP00000257570, 9606. ENSP00000262776, 9606. ENSP00000264705, 9606. ENSP00000268058, 9606. ENSP00000295666, 9606. ENSP00000315768, 9606. ENSP00000317997, 9606. ENSP00000333657, 9606. ENSP00000343023, 9606. ENSP00000354394, 9606. ENSP00000355325, 9606. ENSP00000357459, 9606. ENSP00000359490, 9606. ENSP00000359787, 9606. ENSP00000360869, 9606. ENSP00000360883, 9606. ENSP00000365402, 9606. ENSP00000369299, 9606. ENSP00000374455, 9606. ENSP00000378856, 9606. ENSP00000379873, 9606. ENSP00000381601, 9606. ENSP00000382707, 9606. ENSP00000388001, 9606. ENSP00000395590, 9606. ENSP00000398632, 9606. ENSP00000399168, 9606. ENSP00000418194, 9606. ENSP00000433138 | OAS3, EIF2AK2, SEC61A1, APOL2, C19orf66, OASL, LGALS3BP, CAD, PML, IGF1BP7, STAT2, DUOX1, MX2, SP100, STAT1, PSMB5, ADAR, GBP4, IFI44L, IFIT1, IFIT3, HLA-C, TRIM22, SQSTM1, LGALS9, HLA-A, MX1, IFITM3, OAS1, IFI35, CD44, HLA-B, PARP14, CASP1 |

|            |                                                                                                                   |    |      |      |          |                                                                                                                                                                                                                                                                                                                                                                                                                                                                                                                                                                                                                                                                                                                                                                |                                                                                                                                                                                                                 |
|------------|-------------------------------------------------------------------------------------------------------------------|----|------|------|----------|----------------------------------------------------------------------------------------------------------------------------------------------------------------------------------------------------------------------------------------------------------------------------------------------------------------------------------------------------------------------------------------------------------------------------------------------------------------------------------------------------------------------------------------------------------------------------------------------------------------------------------------------------------------------------------------------------------------------------------------------------------------|-----------------------------------------------------------------------------------------------------------------------------------------------------------------------------------------------------------------|
| GO:0002376 | immune system process                                                                                             | 29 | 2370 | 0.55 | 1.70E-08 | 9606.ENSP00000228928,9606.ENSP00000233057,9606.ENSP00000243253,9606.ENSP00000253110,9606.ENSP00000257570,9606.ENSP0000268058,9606.ENSP00000315768,9606.ENSP00000333657,9606.ENSP00000343023,9606.ENSP00000354394,9606.ENSP00000357459,9606.ENSP00000359490,9606.ENSP00000359787,9606.ENSP00000360869,9606.ENSP00000360883,9606.ENSP00000363993,9606.ENSP00000365402,9606.ENSP00000369299,9606.ENSP00000374455,9606.ENSP00000378856,9606.ENSP00000379873,9606.ENSP00000381601,9606.ENSP00000382707,9606.ENSP00000388001,9606.ENSP00000395590,9606.ENSP00000398632,9606.ENSP00000399168,9606.ENSP00000418194,9606.ENSP00000433138                                                                                                                                | OAS3,EIF2AK2,SEC61A1,C19orf66,OASL,PML,STAT2,MX2,SP100,STAT1,ADAR,GBP4,IFI44L,IFIT1,IFIT3,PSMB9,HLA-C,TRIM22,SQSTM1,LGALS9,HLA-A,MX1,IFITM3,OAS1,IFI35,CD44,HLA-B,PARP14,CASP1                                  |
| GO:0035455 | response to interferon-alpha                                                                                      | 6  | 22   | 1.89 | 2.57E-08 | 9606.ENSP00000233057,9606.ENSP00000333657,9606.ENSP00000357459,9606.ENSP00000360883,9606.ENSP00000382707,9606.ENSP00000388001                                                                                                                                                                                                                                                                                                                                                                                                                                                                                                                                                                                                                                  | EIF2AK2,MX2,ADAR,IFIT3,IFITM3,OAS1                                                                                                                                                                              |
| GO:0042221 | response to chemical                                                                                              | 35 | 4153 | 0.38 | 2.10E-06 | 9606.ENSP00000228928,9606.ENSP00000233057,9606.ENSP00000243253,9606.ENSP00000252809,9606.ENSP00000253110,9606.ENSP00000256722,9606.ENSP00000257570,9606.ENSP00000264705,9606.ENSP00000268058,9606.ENSP00000295666,9606.ENSP00000315768,9606.ENSP00000317997,9606.ENSP00000320485,9606.ENSP00000333657,9606.ENSP00000343023,9606.ENSP00000354394,9606.ENSP00000357459,9606.ENSP00000359490,9606.ENSP00000360869,9606.ENSP00000360883,9606.ENSP00000365402,9606.ENSP00000368678,9606.ENSP00000369299,9606.ENSP00000374455,9606.ENSP00000378856,9606.ENSP00000379038,9606.ENSP00000379873,9606.ENSP00000381601,9606.ENSP00000382707,9606.ENSP00000388001,9606.ENSP00000395590,9606.ENSP00000398632,9606.ENSP00000399168,9606.ENSP00000433138,9606.ENSP00000457513 | OAS3,EIF2AK2,SEC61A1,GDF15,C19orf66,CMPK2,OASL,CAD,PMPL,IGFBP7,STAT2,DUOX1,ARID1A,MX2,SP100,STAT1,ADAR,GBP4,IFIT1,IFIT3,HLA-C,AGRN,TRIM22,SQSTM1,LGALS9,TYMP,HLA-A,MX1,IFITM3,OAS1,IFI35,CD44,HLA-B,CASP1,COX41 |
| GO:0016032 | viral process                                                                                                     | 13 | 571  | 0.82 | 4.36E-06 | 9606.ENSP00000233057,9606.ENSP00000268058,9606.ENSP00000270586,9606.ENSP00000315768,9606.ENSP00000343023,9606.ENSP00000354394,9606.ENSP00000355325,9606.ENSP00000360869,9606.ENSP00000363993,9606.ENSP00000365402,9606.ENSP00000369299,9606.ENSP00000379873,9606.ENSP00000399168                                                                                                                                                                                                                                                                                                                                                                                                                                                                               | EIF2AK2,PML,PSMB6,STAT2,SP100,STAT1,PSMB5,IFIT1,PSMB9,HLA-C,TRIM22,HLA-A,HLA-B                                                                                                                                  |
| GO:0007166 | cell surface receptor signaling pathway                                                                           | 24 | 2198 | 0.5  | 8.67E-06 | 9606.ENSP00000228928,9606.ENSP00000252809,9606.ENSP00000257570,9606.ENSP00000268058,9606.ENSP00000315768,9606.ENSP00000317997,9606.ENSP00000322885,9606.ENSP00000333657,9606.ENSP00000343023,9606.ENSP00000354394,9606.ENSP00000357459,9606.ENSP00000360869,9606.ENSP00000360883,9606.ENSP00000365402,9606.ENSP00000369299,9606.ENSP00000374455,9606.ENSP00000379873,9606.ENSP00000381601,9606.ENSP00000382707,9606.ENSP00000388001,9606.ENSP00000395590,9606.ENSP00000398632,9606.ENSP00000399168,9606.ENSP00000433138                                                                                                                                                                                                                                        | OAS3,GDF15,OASL,PML,STAT2,DUOX1,DTX2,MX2,SP100,STAT1,ADAR,IFIT1,IFIT3,HLA-C,TRIM22,SQSTM1,HLA-A,MX1,IFITM3,OAS1,IFI35,CD44,HLA-B,CASP1                                                                          |
| GO:0002832 | negative regulation of response to biotic stimulus                                                                | 6  | 85   | 1.31 | 3.37E-05 | 9606.ENSP00000357459,9606.ENSP00000360869,9606.ENSP00000378856,9606.ENSP00000379873,9606.ENSP00000399168,9606.ENSP00000418194                                                                                                                                                                                                                                                                                                                                                                                                                                                                                                                                                                                                                                  | ADAR,IFIT1,LGALS9,HLA-A,HLA-B,PARP14                                                                                                                                                                            |
| GO:0002486 | antigen processing and presentation of endogenous peptide antigen via MHC class I via ER pathway, TAP-independent | 3  | 3    | 2.46 | 3.56E-05 | 9606.ENSP00000365402,9606.ENSP00000379873,9606.ENSP00000399168                                                                                                                                                                                                                                                                                                                                                                                                                                                                                                                                                                                                                                                                                                 | HLA-C,HLA-A,HLA-B                                                                                                                                                                                               |
| GO:0045824 | negative regulation of innate immune response                                                                     | 5  | 49   | 1.47 | 5.12E-05 | 9606.ENSP00000357459,9606.ENSP00000378856,9606.ENSP00000379873,9606.ENSP00000399168,9606.ENSP00000418194                                                                                                                                                                                                                                                                                                                                                                                                                                                                                                                                                                                                                                                       | ADAR,LGALS9,HLA-A,HLA-B,PARP14                                                                                                                                                                                  |

|            |                                                                                                   |    |      |      |          |                                                                                                                                                                                                                                                                                                                                                                                                                                                                                                                                                                                                                                                                                                                                                                                                                                                                                                                                                                                                       |                                                                                                                                                                                                                                                                                        |
|------------|---------------------------------------------------------------------------------------------------|----|------|------|----------|-------------------------------------------------------------------------------------------------------------------------------------------------------------------------------------------------------------------------------------------------------------------------------------------------------------------------------------------------------------------------------------------------------------------------------------------------------------------------------------------------------------------------------------------------------------------------------------------------------------------------------------------------------------------------------------------------------------------------------------------------------------------------------------------------------------------------------------------------------------------------------------------------------------------------------------------------------------------------------------------------------|----------------------------------------------------------------------------------------------------------------------------------------------------------------------------------------------------------------------------------------------------------------------------------------|
| GO:0050896 | response to stimulus                                                                              | 46 | 7824 | 0.23 | 1.60E-04 | 9606.ENSP00000228928,9606.ENSP00000233057,9606.ENSP00000243253,9606.ENSP00000249066,9606.ENSP00000252809,9606.ENSP00000253110,9606.ENSP00000256722,9606.ENSP00000257570,9606.ENSP00000262776,9606.ENSP00000264705,9606.ENSP00000268058,9606.ENSP00000290291,9606.ENSP00000295666,9606.ENSP00000315768,9606.ENSP00000317997,9606.ENSP00000320485,9606.ENSP00000322885,9606.ENSP00000333657,9606.ENSP00000337641,9606.ENSP00000343023,9606.ENSP00000354394,9606.ENSP00000355325,9606.ENSP00000355330,9606.ENSP00000357459,9606.ENSP00000357709,9606.ENSP00000359490,9606.ENSP00000359783,9606.ENSP00000359787,9606.ENSP00000360869,9606.ENSP00000360883,9606.ENSP00000365402,9606.ENSP00000368678,9606.ENSP00000369299,9606.ENSP00000374455,9606.ENSP00000378856,9606.ENSP00000379038,9606.ENSP00000379873,9606.ENSP00000381601,9606.ENSP00000382707,9606.ENSP00000388001,9606.ENSP00000395590,9606.ENSP00000398632,9606.ENSP00000399168,9606.ENSP00000418194,9606.ENSP00000433138,9606.ENSP00000457513 | OAS3,EIF2AK2,SEC61A1,APOL2,GDF15,C19orf66,CMPK2,OASL,LGALS3BP,CAD,PML,OGFR,IGFBP7,STAT2,DUOX1,ARID1A,DTX2,MX2,PPP2R5E,SP100,STAT1,PSMB5,TGM2,ADAR,S100A6,GBP4,IFI44,IFI44L,IFIT1,IFIT3,HLA-C,AGRN,TRIM22,SQSTM1,LGALS9,TYMP,HLA-A,MX1,IFITM3,OAS1,IFI35,CD44,HLA-B,PARP14,CASP1,COX4I1 |
| GO:0002480 | antigen processing and presentation of exogenous peptide antigen via MHC class I, TAP-independent | 3  | 8    | 2.03 | 2.60E-04 | 9606.ENSP00000365402,9606.ENSP00000379873,9606.ENSP0000039168                                                                                                                                                                                                                                                                                                                                                                                                                                                                                                                                                                                                                                                                                                                                                                                                                                                                                                                                         | HLA-C,HLA-A,HLA-B                                                                                                                                                                                                                                                                      |
| GO:0007165 | signal transduction                                                                               | 33 | 4738 | 0.3  | 4.60E-04 | 9606.ENSP00000228928,9606.ENSP00000233057,9606.ENSP00000252809,9606.ENSP00000257570,9606.ENSP00000262776,9606.ENSP00000268058,9606.ENSP00000290291,9606.ENSP00000315768,9606.ENSP00000317997,9606.ENSP00000320485,9606.ENSP00000322885,9606.ENSP00000333657,9606.ENSP00000337641,9606.ENSP00000343023,9606.ENSP00000354394,9606.ENSP00000355330,9606.ENSP00000357459,9606.ENSP00000357709,9606.ENSP00000360869,9606.ENSP00000360883,9606.ENSP00000365402,9606.ENSP00000368678,9606.ENSP00000369299,9606.ENSP00000374455,9606.ENSP00000378856,9606.ENSP00000379038,9606.ENSP00000379873,9606.ENSP00000381601,9606.ENSP00000382707,9606.ENSP00000388001,9606.ENSP00000395590,9606.ENSP00000398632,9606.ENSP00000399168,9606.ENSP00000433138                                                                                                                                                                                                                                                             | OAS3,EIF2AK2,GDF15,OASL,LGALS3BP,PML,OGFR,STAT2,DUOX1,ARID1A,DTX2,MX2,PPP2R5E,SP100,STAT1,TGM2,ADAR,S100A6,IFIT1,IFIT3,HLA-C,AGRN,TRIM22,SQSTM1,LGALS9,HLA-A,MX1,IFITM3,OAS1,IFI35,CD44,HLA-B,CASP1                                                                                    |
| GO:0045953 | negative regulation of natural killer cell mediated cytotoxicity                                  | 3  | 13   | 1.82 | 8.00E-04 | 9606.ENSP00000378856,9606.ENSP00000379873,9606.ENSP0000039168                                                                                                                                                                                                                                                                                                                                                                                                                                                                                                                                                                                                                                                                                                                                                                                                                                                                                                                                         | LGALS9,HLA-A,HLA-B                                                                                                                                                                                                                                                                     |
| GO:0031348 | negative regulation of defense response                                                           | 6  | 180  | 0.98 | 1.50E-03 | 9606.ENSP00000357459,9606.ENSP00000360869,9606.ENSP00000378856,9606.ENSP00000379873,9606.ENSP00000399168,9606.ENSP00000418194                                                                                                                                                                                                                                                                                                                                                                                                                                                                                                                                                                                                                                                                                                                                                                                                                                                                         | ADAR,IFIT1,LGALS9,HLA-A,HLA-B,PARP14                                                                                                                                                                                                                                                   |

|            |                                                                                                 |    |      |      |          |                                                                                                                                                                                                                                                                                                                                                                                                                                                                                                                                                                                                                                                                                                                                                                                                        |                                                                                                                                                                                                                           |
|------------|-------------------------------------------------------------------------------------------------|----|------|------|----------|--------------------------------------------------------------------------------------------------------------------------------------------------------------------------------------------------------------------------------------------------------------------------------------------------------------------------------------------------------------------------------------------------------------------------------------------------------------------------------------------------------------------------------------------------------------------------------------------------------------------------------------------------------------------------------------------------------------------------------------------------------------------------------------------------------|---------------------------------------------------------------------------------------------------------------------------------------------------------------------------------------------------------------------------|
| GO:0051716 | cellular response to stimulus                                                                   | 37 | 6212 | 0.23 | 3.10E-03 | 9606.ENSP00000228928,9606.ENSP00000233057,9606.ENSP00000252809,9606.ENSP00000256722,9606.ENSP00000257570,9606.ENSP0000262776,9606.ENSP00000264705,9606.ENSP00000268058,9606.ENSP00000290291,9606.ENSP00000295666,9606.ENSP00000315768,9606.ENSP00000317997,9606.ENSP00000320485,9606.ENSP00000322885,9606.ENSP00000333657,9606.ENSP00000337641,9606.ENSP00000343023,9606.ENSP00000354394,9606.ENSP00000355330,9606.ENSP0000357459,9606.ENSP00000357709,9606.ENSP00000359490,9606.ENSP00000360869,9606.ENSP00000360883,9606.ENSP00000365402,9606.ENSP00000368678,9606.ENSP00000369299,9606.ENSP00000374455,9606.ENSP00000378856,9606.ENSP00000379873,9606.ENSP00000381601,9606.ENSP00000382707,9606.ENSP00000388001,9606.ENSP00000395590,9606.ENSP00000398632,9606.ENSP00000399168,9606.ENSP00000433138 | OAS3,EIF2AK2,GDF15,CMPK2,OASL,LGALS3BP,CAD,PML,OGFR,IGFBP7,STAT2,DUOX1,ARID1A,DTX2,MX2,PPP2R5E,SP100,STAT1,TGM2,ADAR,S100A6,GBP4,IFIT1,IFIT3,HLA-C,AGRN,TRIM22,SQSTM1,LGALS9,HLA-A,MX1,IFITM3,OAS1,IFI35,CD44,HLA-B,CASP1 |
| GO:0031347 | regulation of defense response                                                                  | 10 | 676  | 0.63 | 3.70E-03 | 9606.ENSP00000268058,9606.ENSP00000354394,9606.ENSP00000355330,9606.ENSP00000357459,9606.ENSP00000360869,9606.ENSP00000378856,9606.ENSP00000379873,9606.ENSP00000399168,9606.ENSP00000418194,9606.ENSP00000433138                                                                                                                                                                                                                                                                                                                                                                                                                                                                                                                                                                                      | PML,STAT1,TGM2,ADAR,IFIT1,LGALS9,HLA-A,HLA-B,PARP14,CASP1                                                                                                                                                                 |
| GO:0002479 | antigen processing and presentation of exogenous peptide antigen via MHC class I, TAP-dependent | 3  | 25   | 1.54 | 3.80E-03 | 9606.ENSP00000365402,9606.ENSP00000379873,9606.ENSP0000039168                                                                                                                                                                                                                                                                                                                                                                                                                                                                                                                                                                                                                                                                                                                                          | HLA-C,HLA-A,HLA-B                                                                                                                                                                                                         |
| GO:0002831 | regulation of response to biotic stimulus                                                       | 8  | 426  | 0.73 | 3.80E-03 | 9606.ENSP00000268058,9606.ENSP00000354394,9606.ENSP00000357459,9606.ENSP00000360869,9606.ENSP00000378856,9606.ENSP00000379873,9606.ENSP00000399168,9606.ENSP00000418194                                                                                                                                                                                                                                                                                                                                                                                                                                                                                                                                                                                                                                | PML,STAT1,ADAR,IFIT1,LGALS9,HLA-A,HLA-B,PARP14                                                                                                                                                                            |
| GO:0042270 | protection from natural killer cell mediated cytotoxicity                                       | 2  | 5    | 2.06 | 7.20E-03 | 9606.ENSP00000379873,9606.ENSP00000399168                                                                                                                                                                                                                                                                                                                                                                                                                                                                                                                                                                                                                                                                                                                                                              | HLA-A,HLA-B                                                                                                                                                                                                               |
| GO:0051414 | response to cortisol                                                                            | 2  | 5    | 2.06 | 7.20E-03 | 9606.ENSP00000264705,9606.ENSP00000295666                                                                                                                                                                                                                                                                                                                                                                                                                                                                                                                                                                                                                                                                                                                                                              | CAD,IGFBP7                                                                                                                                                                                                                |
| GO:0070212 | protein poly-ADP-ribosylation                                                                   | 2  | 5    | 2.06 | 7.20E-03 | 9606.ENSP00000325618,9606.ENSP00000418194                                                                                                                                                                                                                                                                                                                                                                                                                                                                                                                                                                                                                                                                                                                                                              | PARP10,PARP14                                                                                                                                                                                                             |
| GO:0043122 | regulation of I-kappaB kinase/NF-kappaB signaling                                               | 5  | 167  | 0.94 | 9.00E-03 | 9606.ENSP00000354394,9606.ENSP00000355330,9606.ENSP00000369299,9606.ENSP00000374455,9606.ENSP00000433138                                                                                                                                                                                                                                                                                                                                                                                                                                                                                                                                                                                                                                                                                               | STAT1,TGM2,TRIM22,SQSTM1,CASP1                                                                                                                                                                                            |
| GO:0050706 | regulation of interleukin-1 beta secretion                                                      | 3  | 37   | 1.37 | 9.80E-03 | 9606.ENSP00000268058,9606.ENSP00000378856,9606.ENSP00000433138                                                                                                                                                                                                                                                                                                                                                                                                                                                                                                                                                                                                                                                                                                                                         | PML,LGALS9,CASP1                                                                                                                                                                                                          |
| GO:0003374 | dynamins family protein polymerization involved in mitochondrial fission                        | 2  | 7    | 1.91 | 1.09E-02 | 9606.ENSP00000333657,9606.ENSP00000381601                                                                                                                                                                                                                                                                                                                                                                                                                                                                                                                                                                                                                                                                                                                                                              | MX2,MX1                                                                                                                                                                                                                   |
| GO:0050691 | regulation of defense response to virus by host                                                 | 3  | 39   | 1.35 | 1.09E-02 | 9606.ENSP00000268058,9606.ENSP00000354394,9606.ENSP00000360869                                                                                                                                                                                                                                                                                                                                                                                                                                                                                                                                                                                                                                                                                                                                         | PML,STAT1,IFIT1                                                                                                                                                                                                           |
| GO:0060700 | regulation of ribonuclease activity                                                             | 2  | 7    | 1.91 | 1.09E-02 | 9606.ENSP00000228928,9606.ENSP00000388001                                                                                                                                                                                                                                                                                                                                                                                                                                                                                                                                                                                                                                                                                                                                                              | OAS3,OAS1                                                                                                                                                                                                                 |
| GO:0007565 | female pregnancy                                                                                | 5  | 180  | 0.9  | 1.12E-02 | 9606.ENSP00000249066,9606.ENSP00000264705,9606.ENSP00000295666,9606.ENSP00000320485,9606.ENSP00000378856                                                                                                                                                                                                                                                                                                                                                                                                                                                                                                                                                                                                                                                                                               | APOL2,CAD,IGFBP7,ARID1A,LGALS9                                                                                                                                                                                            |
| GO:0080134 | regulation of response to stress                                                                | 13 | 1299 | 0.46 | 1.19E-02 | 9606.ENSP00000233057,9606.ENSP00000261517,9606.ENSP00000268058,9606.ENSP00000354394,9606.ENSP00000355330,9606.ENSP00000357459,9606.ENSP00000360869,9606.ENSP00000378856,9606.ENSP00000379873,9606.ENSP00000398632,9606.ENSP00000399168,9606.ENSP00000418194,9606.ENSP00000433138                                                                                                                                                                                                                                                                                                                                                                                                                                                                                                                       | EIF2AK2,VPS13C,PML,STAT1,TGM2,ADAR,IFIT1,LGALS9,HLA-A,CD44,HLA-B,PARP14,CASP1                                                                                                                                             |
| GO:0046719 | regulation by virus of viral protein levels in host cell                                        | 2  | 8    | 1.86 | 1.24E-02 | 9606.ENSP00000354394,9606.ENSP00000360869                                                                                                                                                                                                                                                                                                                                                                                                                                                                                                                                                                                                                                                                                                                                                              | STAT1,IFIT1                                                                                                                                                                                                               |
| GO:0002698 | negative regulation of immune effector process                                                  | 4  | 113  | 1.01 | 1.68E-02 | 9606.ENSP00000360869,9606.ENSP00000378856,9606.ENSP00000379873,9606.ENSP00000399168                                                                                                                                                                                                                                                                                                                                                                                                                                                                                                                                                                                                                                                                                                                    | IFIT1,LGALS9,HLA-A,HLA-B                                                                                                                                                                                                  |



|            |                                                        |    |      |      |          |                                                                                                                                                                                                                                                                                                                                                                                                                                                                                                                                                                                                                                  |                                                                                                                                                                                        |
|------------|--------------------------------------------------------|----|------|------|----------|----------------------------------------------------------------------------------------------------------------------------------------------------------------------------------------------------------------------------------------------------------------------------------------------------------------------------------------------------------------------------------------------------------------------------------------------------------------------------------------------------------------------------------------------------------------------------------------------------------------------------------|----------------------------------------------------------------------------------------------------------------------------------------------------------------------------------------|
| GO:0032102 | negative regulation of response to external stimulus   | 6  | 310  | 0.75 | 1.77E-02 | 9606.ENSP00000357459,9606.ENSP00000360869,9606.ENSP00000378856,9606.ENSP00000379873,9606.ENSP00000399168,9606.ENSP00000418194                                                                                                                                                                                                                                                                                                                                                                                                                                                                                                    | ADAR,IFIT1,LGALS9,HLA-A,HLA-B,PARP14                                                                                                                                                   |
| GO:2001198 | regulation of dendritic cell differentiation           | 2  | 11   | 1.72 | 2.00E-02 | 9606.ENSP00000378856,9606.ENSP00000399168                                                                                                                                                                                                                                                                                                                                                                                                                                                                                                                                                                                        | LGALS9,HLA-B                                                                                                                                                                           |
| GO:0072528 | pyrimidine-containing compound biosynthetic process    | 3  | 54   | 1.2  | 2.21E-02 | 9606.ENSP00000256722,9606.ENSP00000264705,9606.ENSP00000379038                                                                                                                                                                                                                                                                                                                                                                                                                                                                                                                                                                   | CMPK2,CAD,TYMP                                                                                                                                                                         |
| GO:0035457 | cellular response to interferon-alpha                  | 2  | 12   | 1.68 | 2.25E-02 | 9606.ENSP00000360883,9606.ENSP00000388001                                                                                                                                                                                                                                                                                                                                                                                                                                                                                                                                                                                        | IFIT3,OAS1                                                                                                                                                                             |
| GO:1903902 | positive regulation of viral life cycle                | 3  | 59   | 1.17 | 2.70E-02 | 9606.ENSP00000357459,9606.ENSP00000360869,9606.ENSP00000378856                                                                                                                                                                                                                                                                                                                                                                                                                                                                                                                                                                   | ADAR,IFIT1,LGALS9                                                                                                                                                                      |
| GO:0048519 | negative regulation of biological process              | 29 | 4953 | 0.23 | 2.82E-02 | 9606.ENSP00000228928,9606.ENSP00000233057,9606.ENSP00000252809,9606.ENSP00000253110,9606.ENSP00000257570,9606.ENSP00000261517,9606.ENSP00000268058,9606.ENSP00000295666,9606.ENSP00000320485,9606.ENSP00000325618,9606.ENSP00000343023,9606.ENSP00000347495,9606.ENSP00000351811,9606.ENSP00000354394,9606.ENSP00000357459,9606.ENSP00000360869,9606.ENSP00000360883,9606.ENSP00000369299,9606.ENSP00000374455,9606.ENSP00000378856,9606.ENSP00000379873,9606.ENSP00000381601,9606.ENSP00000382707,9606.ENSP00000388001,9606.ENSP00000398632,9606.ENSP00000399168,9606.ENSP00000418194,9606.ENSP00000464087,9606.ENSP00000475814 | OAS3,EIF2AK2,GDF15,C19orf66,OASL,VPS13C,PML,IGFBP7,ARID1A,PARP10,SP100,WARS,EDC4,STAT1,ADAR,IFIT1,IFIT3,TRIM22,SQSTM1,LGALS9,HLA-A,MX1,IFITM3,OAS1,CD44,HLA-B,PARP14,RNF213,HIST2H2AA3 |
| GO:0016045 | detection of bacterium                                 | 2  | 15   | 1.58 | 3.13E-02 | 9606.ENSP00000379873,9606.ENSP00000399168                                                                                                                                                                                                                                                                                                                                                                                                                                                                                                                                                                                        | HLA-A,HLA-B                                                                                                                                                                            |
| GO:0002697 | regulation of immune effector process                  | 6  | 362  | 0.68 | 3.36E-02 | 9606.ENSP00000268058,9606.ENSP00000354394,9606.ENSP00000360869,9606.ENSP00000378856,9606.ENSP00000379873,9606.ENSP00000399168                                                                                                                                                                                                                                                                                                                                                                                                                                                                                                    | PML,STAT1,IFIT1,LGALS9,HLA-A,HLA-B                                                                                                                                                     |
| GO:0032101 | regulation of response to external stimulus            | 10 | 955  | 0.48 | 3.36E-02 | 9606.ENSP00000268058,9606.ENSP00000354394,9606.ENSP0000035330,9606.ENSP00000357459,9606.ENSP00000360869,9606.ENSP00000378856,9606.ENSP00000379873,9606.ENSP00000399168,9606.ENSP00000418194,9606.ENSP00000433138                                                                                                                                                                                                                                                                                                                                                                                                                 | PML,STAT1,TGM2,ADAR,IFIT1,LGALS9,HLA-A,HLA-B,PARP14,CASP1                                                                                                                              |
| GO:0045088 | regulation of innate immune response                   | 6  | 361  | 0.68 | 3.36E-02 | 9606.ENSP00000354394,9606.ENSP00000357459,9606.ENSP00000378856,9606.ENSP00000379873,9606.ENSP00000399168,9606.ENSP00000418194                                                                                                                                                                                                                                                                                                                                                                                                                                                                                                    | STAT1,ADAR,LGALS9,HLA-A,HLA-B,PARP14                                                                                                                                                   |
| GO:2000116 | regulation of cysteine-type endopeptidase activity     | 5  | 243  | 0.77 | 3.36E-02 | 9606.ENSP00000268058,9606.ENSP00000363993,9606.ENSP00000378856,9606.ENSP00000398632,9606.ENSP00000433138                                                                                                                                                                                                                                                                                                                                                                                                                                                                                                                         | PML,PSMB9,LGALS9,CD44,CASP1                                                                                                                                                            |
| GO:0001916 | positive regulation of T cell mediated cytotoxicity    | 2  | 17   | 1.53 | 3.68E-02 | 9606.ENSP00000379873,9606.ENSP00000399168                                                                                                                                                                                                                                                                                                                                                                                                                                                                                                                                                                                        | HLA-A,HLA-B                                                                                                                                                                            |
| GO:0048384 | retinoic acid receptor signaling pathway               | 2  | 17   | 1.53 | 3.68E-02 | 9606.ENSP00000268058,9606.ENSP00000343023                                                                                                                                                                                                                                                                                                                                                                                                                                                                                                                                                                                        | PML,SP100                                                                                                                                                                              |
| GO:0001959 | regulation of cytokine-mediated signaling pathway      | 4  | 151  | 0.88 | 3.82E-02 | 9606.ENSP00000354394,9606.ENSP00000357459,9606.ENSP00000418194,9606.ENSP00000433138                                                                                                                                                                                                                                                                                                                                                                                                                                                                                                                                              | STAT1,ADAR,PARP14,CASP1                                                                                                                                                                |
| GO:0014074 | response to purine-containing compound                 | 4  | 151  | 0.88 | 3.82E-02 | 9606.ENSP00000264705,9606.ENSP00000317997,9606.ENSP00000354394,9606.ENSP00000433138                                                                                                                                                                                                                                                                                                                                                                                                                                                                                                                                              | CAD,DUOX1,STAT1,CASP1                                                                                                                                                                  |
| GO:0006206 | pyrimidine nucleobase metabolic process                | 2  | 18   | 1.5  | 3.89E-02 | 9606.ENSP00000264705,9606.ENSP00000379038                                                                                                                                                                                                                                                                                                                                                                                                                                                                                                                                                                                        | CAD,TYMP                                                                                                                                                                               |
| GO:0043555 | regulation of translation in response to stress        | 2  | 18   | 1.5  | 3.89E-02 | 9606.ENSP00000233057,9606.ENSP00000268058                                                                                                                                                                                                                                                                                                                                                                                                                                                                                                                                                                                        | EIF2AK2,PML                                                                                                                                                                            |
| GO:0046641 | positive regulation of alpha-beta T cell proliferation | 2  | 18   | 1.5  | 3.89E-02 | 9606.ENSP00000378856,9606.ENSP00000379873                                                                                                                                                                                                                                                                                                                                                                                                                                                                                                                                                                                        | LGALS9,HLA-A                                                                                                                                                                           |

|            |                                                         |   |     |      |          |                                                                                                                                                                         |                                                   |
|------------|---------------------------------------------------------|---|-----|------|----------|-------------------------------------------------------------------------------------------------------------------------------------------------------------------------|---------------------------------------------------|
| GO:0008285 | negative regulation of cell population proliferation    | 8 | 669 | 0.54 | 3.98E-02 | 9606.ENSP00000233057,9606.ENSP00000268058,9606.ENSP00000295666,9606.ENSP00000325618,9606.ENSP00000347495,9606.ENSP00000354394,9606.ENSP00000360883,9606.ENSP00000378856 | EIF2AK2,PML,IGFBP7,PARP10,WARS,STAT1,IFIT3,LGALS9 |
| GO:0000266 | mitochondrial fission                                   | 2 | 19  | 1.48 | 4.06E-02 | 9606.ENSP00000333657,9606.ENSP00000381601                                                                                                                               | MX2,MX1                                           |
| GO:0009148 | pyrimidine nucleoside triphosphate biosynthetic process | 2 | 19  | 1.48 | 4.06E-02 | 9606.ENSP00000256722,9606.ENSP00000264705                                                                                                                               | CMPK2,CAD                                         |

T = 72 h (CoV-2), IFN $\alpha$ 7 / Untreated

| #Term ID   | Term Description                    | Observed Gene Count | Background Gene Count | Strength | False Discovery Rate | Matching Proteins in Your Input (IDs)                                                                                                                                                                                                                                                                                                                                                                                                                                                             | Matching Proteins in Your Input (Labels)                                                                                                    |
|------------|-------------------------------------|---------------------|-----------------------|----------|----------------------|---------------------------------------------------------------------------------------------------------------------------------------------------------------------------------------------------------------------------------------------------------------------------------------------------------------------------------------------------------------------------------------------------------------------------------------------------------------------------------------------------|---------------------------------------------------------------------------------------------------------------------------------------------|
| GO:0060337 | type I interferon signaling pathway | 12                  | 65                    | 1.71     | 1.03E-13             | 9606.ENSP00000315768,9606.ENSP00000333657,9606.ENSP0000343023,9606.ENSP0000354394,9606.ENSP0000360869,9606.ENSP0000360883,9606.ENSP0000365402,9606.ENSP0000379873,9606.ENSP0000381601,9606.ENSP0000388001,9606.ENSP0000395590,9606.ENSP0000399168                                                                                                                                                                                                                                                 | STAT2,MX2,SP100,STAT1,IFIT1,IFIT3,HLA-C,HLA-A,MX1,OAS1,IFI35,HLA-B                                                                          |
| GO:0051707 | response to other organism          | 24                  | 1173                  | 0.75     | 8.26E-10             | 9606.ENSP00000233057,9606.ENSP00000256722,9606.ENSP0000269701,9606.ENSP0000304236,9606.ENSP0000310275,9606.ENSP0000315768,9606.ENSP0000333657,9606.ENSP0000343023,9606.ENSP0000349436,9606.ENSP0000354394,9606.ENSP0000359490,9606.ENSP0000359783,9606.ENSP0000359787,9606.ENSP0000360869,9606.ENSP0000360883,9606.ENSP0000365402,9606.ENSP0000377470,9606.ENSP0000379873,9606.ENSP0000381601,9606.ENSP0000388001,9606.ENSP0000395590,9606.ENSP0000399168,9606.ENSP0000399888,9606.ENSP0000418194 | EIF2AK2,CMPK2,AKAP8,CD14,BANF1,STAT2,MX2,SP100,ADAM15,STAT1,GBP4,IFI44,IFI44L,IFIT1,IFIT3,HLA-C,CNP,HLA-A,MX1,OAS1,IFI35,HLA-B,HMGA1,PARP14 |
| GO:0045087 | innate immune response              | 18                  | 676                   | 0.87     | 8.22E-09             | 9606.ENSP00000233057,9606.ENSP00000269701,9606.ENSP0000304236,9606.ENSP0000315768,9606.ENSP0000333657,9606.ENSP0000343023,9606.ENSP0000349436,9606.ENSP0000354394,9606.ENSP0000359490,9606.ENSP0000360869,9606.ENSP0000360883,9606.ENSP0000365402,9606.ENSP0000379873,9606.ENSP0000381601,9606.ENSP0000388001,9606.ENSP0000395590,9606.ENSP0000399168,9606.ENSP0000418194                                                                                                                         | EIF2AK2,AKAP8,CD14,STAT2,MX2,SP100,ADAM15,STAT1,GBP4,IFIT1,IFIT3,HLA-C,HLA-A,MX1,OAS1,IFI35,HLA-B,PARP14                                    |
| GO:0098542 | defense response to other organism  | 19                  | 859                   | 0.79     | 4.05E-08             | 9606.ENSP00000233057,9606.ENSP00000269701,9606.ENSP0000304236,9606.ENSP0000315768,9606.ENSP0000333657,9606.ENSP0000343023,9606.ENSP0000349436,9606.ENSP0000354394,9606.ENSP0000359490,9606.ENSP0000359787,9606.ENSP0000360869,9606.ENSP0000360883,9606.ENSP0000365402,9606.ENSP0000379873,9606.ENSP0000381601,9606.ENSP0000388001,9606.ENSP0000395590,9606.ENSP0000399168,9606.ENSP0000418194                                                                                                     | EIF2AK2,AKAP8,CD14,STAT2,MX2,SP100,ADAM15,STAT1,GBP4,IFI44L,IFIT1,IFIT3,HLA-C,HLA-A,MX1,OAS1,IFI35,HLA-B,PARP14                             |
| GO:0009615 | response to virus                   | 12                  | 270                   | 1.09     | 7.32E-08             | 9606.ENSP00000233057,9606.ENSP00000310275,9606.ENSP0000315768,9606.ENSP0000333657,9606.ENSP0000354394,9606.ENSP0000359783,9606.ENSP0000359787,9606.ENSP0000360869,9606.ENSP0000360883,9606.ENSP0000381601,9606.ENSP0000388001,9606.ENSP0000399888                                                                                                                                                                                                                                                 | EIF2AK2,BANF1,STAT2,MX2,STAT1,IFI44,IFI44L,IFIT1,IFIT3,MX1,OAS1,HMGA1                                                                       |

|            |                                                                                                                   |    |      |      |          |                                                                                                                                                                                                                                                                                                                                                                                                                                                                                                                                                                                                                                         |                                                                                                                                                                                              |
|------------|-------------------------------------------------------------------------------------------------------------------|----|------|------|----------|-----------------------------------------------------------------------------------------------------------------------------------------------------------------------------------------------------------------------------------------------------------------------------------------------------------------------------------------------------------------------------------------------------------------------------------------------------------------------------------------------------------------------------------------------------------------------------------------------------------------------------------------|----------------------------------------------------------------------------------------------------------------------------------------------------------------------------------------------|
| GO:0009605 | response to external stimulus                                                                                     | 28 | 2152 | 0.55 | 1.09E-07 | 9606. ENSP00000233057,9606. ENSP00000256722,9606. ENSP00000269701,9606. ENSP00000304236,9606. ENSP00000310275,9606. ENSP00000315768,9606. ENSP00000333657,9606. ENSP00000343023,9606. ENSP00000349436,9606. ENSP00000354394,9606. ENSP00000359490,9606. ENSP00000359783,9606. ENSP00000359787,9606. ENSP00000360869,9606. ENSP00000360883,9606. ENSP00000365402,9606. ENSP00000369927,9606. ENSP00000377470,9606. ENSP00000379038,9606. ENSP00000379873,9606. ENSP00000381601,9606. ENSP00000385205,9606. ENSP00000388001,9606. ENSP00000395590,9606. ENSP00000399168,9606. ENSP00000399888,9606. ENSP00000418194,9606. ENSP00000467141 | EIF2AK2, CMPK2, AKAP8, CD14, BANF1, STAT2, MX2, SP100, ADAM15, STAT1, GBP4, IFI44, IFI44L, IFIT1, IFIT3, HLA-C, AKR1C3, CNP, TYMP, HLA-A, MX1, PICK1, OAS1, IFI35, HLA-B, HMGA1, PARP14, TTN |
| GO:0043901 | negative regulation of multi-organism process                                                                     | 10 | 212  | 1.11 | 1.15E-06 | 9606. ENSP00000233057,9606. ENSP00000310275,9606. ENSP00000343023,9606. ENSP00000354394,9606. ENSP00000360869,9606. ENSP00000379873,9606. ENSP00000381601,9606. ENSP00000388001,9606. ENSP00000399168,9606. ENSP00000418194                                                                                                                                                                                                                                                                                                                                                                                                             | EIF2AK2, BANF1, SP100, STAT1, IFIT1, HLA-A, MX1, OAS1, HLA-B, PARP14                                                                                                                         |
| GO:0051607 | defense response to virus                                                                                         | 9  | 181  | 1.14 | 4.09E-06 | 9606. ENSP00000233057,9606. ENSP00000315768,9606. ENSP00000333657,9606. ENSP00000354394,9606. ENSP00000359787,9606. ENSP00000360869,9606. ENSP00000360883,9606. ENSP00000381601,9606. ENSP00000388001                                                                                                                                                                                                                                                                                                                                                                                                                                   | EIF2AK2, STAT2, MX2, STAT1, IFI44L, IFIT1, IFIT3, MX1, OAS1                                                                                                                                  |
| GO:0048525 | negative regulation of viral process                                                                              | 7  | 93   | 1.32 | 9.38E-06 | 9606. ENSP00000233057,9606. ENSP00000310275,9606. ENSP00000343023,9606. ENSP00000354394,9606. ENSP00000360869,9606. ENSP00000381601,9606. ENSP00000388001                                                                                                                                                                                                                                                                                                                                                                                                                                                                               | EIF2AK2, BANF1, SP100, STAT1, IFIT1, MX1, OAS1                                                                                                                                               |
| GO:0051704 | multi-organism process                                                                                            | 27 | 2514 | 0.47 | 1.01E-05 | 9606. ENSP00000233057,9606. ENSP00000256722,9606. ENSP00000263121,9606. ENSP00000269701,9606. ENSP00000304236,9606. ENSP00000310275,9606. ENSP00000315768,9606. ENSP00000320485,9606. ENSP00000333657,9606. ENSP00000343023,9606. ENSP00000349436,9606. ENSP00000354394,9606. ENSP00000359490,9606. ENSP00000359783,9606. ENSP00000359787,9606. ENSP00000360869,9606. ENSP00000360883,9606. ENSP00000365402,9606. ENSP00000377470,9606. ENSP00000379873,9606. ENSP00000381601,9606. ENSP00000385205,9606. ENSP00000388001,9606. ENSP00000395590,9606. ENSP00000399168,9606. ENSP00000399888,9606. ENSP00000418194                       | EIF2AK2, CMPK2, SMARCB1, AKAP8, CD14, BANF1, STAT2, ARID1A, MX2, SP100, ADAM15, STAT1, GBP4, IFI44, IFI44L, IFIT1, IFIT3, HLA-C, CNP, HLA-A, MX1, PICK1, OAS1, IFI35, HLA-B, HMGA1, PARP14   |
| GO:0050792 | regulation of viral process                                                                                       | 8  | 174  | 1.1  | 3.34E-05 | 9606. ENSP00000233057,9606. ENSP00000263121,9606. ENSP00000310275,9606. ENSP00000343023,9606. ENSP00000354394,9606. ENSP00000360869,9606. ENSP00000381601,9606. ENSP00000388001                                                                                                                                                                                                                                                                                                                                                                                                                                                         | EIF2AK2, SMARCB1, BANF1, SP100, STAT1, IFIT1, MX1, OAS1                                                                                                                                      |
| GO:0060333 | interferon-gamma-mediated signaling pathway                                                                       | 6  | 69   | 1.38 | 3.34E-05 | 9606. ENSP00000343023,9606. ENSP00000354394,9606. ENSP00000365402,9606. ENSP00000379873,9606. ENSP00000388001,9606. ENSP00000399168                                                                                                                                                                                                                                                                                                                                                                                                                                                                                                     | SP100, STAT1, HLA-C, HLA-A, OAS1, HLA-B                                                                                                                                                      |
| GO:0002486 | antigen processing and presentation of endogenous peptide antigen via MHC class I via ER pathway, TAP-independent | 3  | 3    | 2.44 | 8.97E-05 | 9606. ENSP00000365402,9606. ENSP00000379873,9606. ENSP00000399168                                                                                                                                                                                                                                                                                                                                                                                                                                                                                                                                                                       | HLA-C, HLA-A, HLA-B                                                                                                                                                                          |

|            |                                                                                                   |    |      |      |          |                                                                                                                                                                                                                                                                                                                                                                                                                |                                                                                                                  |
|------------|---------------------------------------------------------------------------------------------------|----|------|------|----------|----------------------------------------------------------------------------------------------------------------------------------------------------------------------------------------------------------------------------------------------------------------------------------------------------------------------------------------------------------------------------------------------------------------|------------------------------------------------------------------------------------------------------------------|
| GO:0006955 | immune response                                                                                   | 19 | 1560 | 0.53 | 1.70E-04 | 9606.ENSP00000233057,9606.ENSP00000269701,9606.ENSP00000271638,9606.ENSP00000304236,9606.ENSP00000315768,9606.ENSP00000333657,9606.ENSP00000343023,9606.ENSP00000349436,9606.ENSP00000354394,9606.ENSP00000359490,9606.ENSP00000360869,9606.ENSP00000360883,9606.ENSP00000365402,9606.ENSP00000379873,9606.ENSP00000381601,9606.ENSP00000388001,9606.ENSP00000395590,9606.ENSP00000399168,9606.ENSP00000418194 | EIF2AK2,AKAP8,S100A11,CD14,STAT2,MX2,SP100,ADAM15,STAT1,GBP4,IFIT1,IFIT3,HLA-C,HLA-A,MX1,OAS1,IFI35,HLA-B,PARP14 |
| GO:0035455 | response to interferon-alpha                                                                      | 4  | 22   | 1.7  | 1.70E-04 | 9606.ENSP00000233057,9606.ENSP00000333657,9606.ENSP00000360883,9606.ENSP00000388001                                                                                                                                                                                                                                                                                                                            | EIF2AK2,MX2,IFIT3,OAS1                                                                                           |
| GO:0045071 | negative regulation of viral genome replication                                                   | 5  | 52   | 1.42 | 1.70E-04 | 9606.ENSP00000233057,9606.ENSP00000310275,9606.ENSP00000360869,9606.ENSP00000381601,9606.ENSP00000388001                                                                                                                                                                                                                                                                                                       | EIF2AK2,BANF1,IFIT1,MX1,OAS1                                                                                     |
| GO:0071346 | cellular response to interferon-gamma                                                             | 7  | 155  | 1.1  | 1.70E-04 | 9606.ENSP00000343023,9606.ENSP00000354394,9606.ENSP00000359490,9606.ENSP00000365402,9606.ENSP00000379873,9606.ENSP00000388001,9606.ENSP00000399168                                                                                                                                                                                                                                                             | SP100,STAT1,GBP4,HLA-C,HLA-A,OAS1,HLA-B                                                                          |
| GO:0034097 | response to cytokine                                                                              | 15 | 1035 | 0.6  | 3.00E-04 | 9606.ENSP00000233057,9606.ENSP00000304236,9606.ENSP00000315768,9606.ENSP00000333657,9606.ENSP00000343023,9606.ENSP00000354394,9606.ENSP00000359490,9606.ENSP00000360869,9606.ENSP00000360883,9606.ENSP00000365402,9606.ENSP00000379873,9606.ENSP00000381601,9606.ENSP00000388001,9606.ENSP00000395590,9606.ENSP00000399168                                                                                     | EIF2AK2,CD14,STAT2,MX2,SP100,STAT1,GBP4,IFIT1,IFIT3,HLA-C,HLA-A,MX1,OAS1,IFI35,HLA-B                             |
| GO:0043900 | regulation of multi-organism process                                                              | 12 | 653  | 0.7  | 3.00E-04 | 9606.ENSP00000233057,9606.ENSP00000263121,9606.ENSP00000304236,9606.ENSP00000310275,9606.ENSP00000343023,9606.ENSP00000354394,9606.ENSP00000360869,9606.ENSP00000379873,9606.ENSP00000381601,9606.ENSP00000388001,9606.ENSP00000399168,9606.ENSP00000418194                                                                                                                                                    | EIF2AK2,SMARCB1,CD14,BANF1,SP100,STAT1,IFIT1,HLA-A,MX1,OAS1,HLA-B,PARP14                                         |
| GO:0002252 | immune effector process                                                                           | 14 | 927  | 0.62 | 3.50E-04 | 9606.ENSP00000233057,9606.ENSP00000271638,9606.ENSP00000304236,9606.ENSP00000315768,9606.ENSP00000333657,9606.ENSP00000354394,9606.ENSP00000359787,9606.ENSP00000360869,9606.ENSP00000360883,9606.ENSP00000365402,9606.ENSP00000379873,9606.ENSP00000381601,9606.ENSP00000388001,9606.ENSP00000399168                                                                                                          | EIF2AK2,S100A11,CD14,STAT2,MX2,STAT1,IFI44L,IFIT1,IFIT3,HLA-C,HLA-A,MX1,OAS1,HLA-B                               |
| GO:0002480 | antigen processing and presentation of exogenous peptide antigen via MHC class I, TAP-independent | 3  | 8    | 2.01 | 4.30E-04 | 9606.ENSP00000365402,9606.ENSP00000379873,9606.ENSP00000399168                                                                                                                                                                                                                                                                                                                                                 | HLA-C,HLA-A,HLA-B                                                                                                |
| GO:0016032 | viral process                                                                                     | 11 | 571  | 0.73 | 4.30E-04 | 9606.ENSP00000233057,9606.ENSP00000263121,9606.ENSP00000310275,9606.ENSP00000315768,9606.ENSP00000343023,9606.ENSP00000354394,9606.ENSP00000360869,9606.ENSP00000365402,9606.ENSP00000379873,9606.ENSP00000399168,9606.ENSP00000399888                                                                                                                                                                         | EIF2AK2,SMARCB1,BANF1,STAT2,SP100,STAT1,IFIT1,HLA-C,HLA-A,HLA-B,HMGA1                                            |

|            |                                                                                                 |    |      |      |          |                                                                                                                                                                                                                                                                                                                                                                                                                                                                                                    |                                                                                                                                        |
|------------|-------------------------------------------------------------------------------------------------|----|------|------|----------|----------------------------------------------------------------------------------------------------------------------------------------------------------------------------------------------------------------------------------------------------------------------------------------------------------------------------------------------------------------------------------------------------------------------------------------------------------------------------------------------------|----------------------------------------------------------------------------------------------------------------------------------------|
| GO:0071345 | cellular response to cytokine stimulus                                                          | 13 | 953  | 0.58 | 1.80E-03 | 9606.ENSP00000315768,9606.ENSP00000333657,9606.ENSP00000343023,9606.ENSP00000354394,9606.ENSP00000359490,9606.ENSP00000360869,9606.ENSP00000360883,9606.ENSP00000365402,9606.ENSP00000379873,9606.ENSP00000381601,9606.ENSP00000388001,9606.ENSP00000395590,9606.ENSP00000399168                                                                                                                                                                                                                   | STAT2,MX2,SP100,STAT1,GBP4,IFIT1,IFIT3,HLA-C,HLA-A,MX1,OAS1,IFI35,HLA-B                                                                |
| GO:0006337 | nucleosome disassembly                                                                          | 3  | 18   | 1.66 | 2.60E-03 | 9606.ENSP00000263121,9606.ENSP00000320485,9606.ENSP00000399888                                                                                                                                                                                                                                                                                                                                                                                                                                     | SMARCB1,ARID1A,HMGA1                                                                                                                   |
| GO:0002376 | immune system process                                                                           | 21 | 2370 | 0.39 | 3.10E-03 | 9606.ENSP00000233057,9606.ENSP00000269701,9606.ENSP00000271638,9606.ENSP00000304236,9606.ENSP00000315768,9606.ENSP00000333657,9606.ENSP00000343023,9606.ENSP00000349436,9606.ENSP00000354394,9606.ENSP00000359490,9606.ENSP00000359787,9606.ENSP00000360869,9606.ENSP00000360883,9606.ENSP00000365402,9606.ENSP00000367123,9606.ENSP00000379873,9606.ENSP00000381601,9606.ENSP00000388001,9606.ENSP00000395590,9606.ENSP00000399168,9606.ENSP00000418194                                           | EIF2AK2,AKAP8,S100A11,CD14,STAT2,MX2,SP100,ADAM15,STAT1,GBP4,IFI44L,IFIT1,IFIT3,HLA-C,SLC3A2,HLA-A,MX1,OAS1,IFI35,HLA-B,PARP14         |
| GO:0071310 | cellular response to organic substance                                                          | 20 | 2219 | 0.4  | 3.70E-03 | 9606.ENSP00000233057,9606.ENSP00000256722,9606.ENSP00000269701,9606.ENSP00000304236,9606.ENSP00000315768,9606.ENSP00000320485,9606.ENSP00000333657,9606.ENSP00000343023,9606.ENSP00000349436,9606.ENSP00000354394,9606.ENSP00000359490,9606.ENSP00000360869,9606.ENSP00000360883,9606.ENSP00000365402,9606.ENSP00000369927,9606.ENSP00000379873,9606.ENSP00000381601,9606.ENSP00000388001,9606.ENSP00000395590,9606.ENSP00000399168                                                                | EIF2AK2,CMPK2,AKAP8,CD14,STAT2,ARID1A,MX2,SP100,ADAM15,STAT1,GBP4,IFIT1,IFIT3,HLA-C,AKR1C3,HLA-A,MX1,OAS1,IFI35,HLA-B                  |
| GO:0010033 | response to organic substance                                                                   | 23 | 2815 | 0.35 | 4.10E-03 | 9606.ENSP00000233057,9606.ENSP00000256722,9606.ENSP00000269701,9606.ENSP00000285737,9606.ENSP00000304236,9606.ENSP00000315768,9606.ENSP00000320485,9606.ENSP00000333657,9606.ENSP00000343023,9606.ENSP00000349436,9606.ENSP00000354394,9606.ENSP00000359490,9606.ENSP00000360869,9606.ENSP00000360883,9606.ENSP00000365402,9606.ENSP00000367123,9606.ENSP00000369927,9606.ENSP00000377470,9606.ENSP00000379873,9606.ENSP00000381601,9606.ENSP00000388001,9606.ENSP00000395590,9606.ENSP00000399168 | EIF2AK2,CMPK2,AKAP8,LONP2,CD14,STAT2,ARID1A,MX2,SP100,ADAM15,STAT1,GBP4,IFIT1,IFIT3,HLA-C,SLC3A2,AKR1C3,CNP,HLA-A,MX1,OAS1,IFI35,HLA-B |
| GO:0002479 | antigen processing and presentation of exogenous peptide antigen via MHC class I, TAP-dependent | 3  | 25   | 1.52 | 5.40E-03 | 9606.ENSP00000365402,9606.ENSP00000379873,9606.ENSP00000399168                                                                                                                                                                                                                                                                                                                                                                                                                                     | HLA-C,HLA-A,HLA-B                                                                                                                      |
| GO:0042270 | protection from natural killer cell mediated cytotoxicity                                       | 2  | 5    | 2.04 | 9.80E-03 | 9606.ENSP00000379873,9606.ENSP00000399168                                                                                                                                                                                                                                                                                                                                                                                                                                                          | HLA-A,HLA-B                                                                                                                            |
| GO:0002832 | negative regulation of response to biotic stimulus                                              | 4  | 85   | 1.11 | 1.09E-02 | 9606.ENSP00000360869,9606.ENSP00000379873,9606.ENSP00000399168,9606.ENSP00000418194                                                                                                                                                                                                                                                                                                                                                                                                                | IFIT1,HLA-A,HLA-B,PARP14                                                                                                               |

|            |                                                                         |    |      |      |          |                                                                                                                                                                                                                                                                                                                                                                                                                                                                                                                                                                                                             |                                                                                                                                                                                 |
|------------|-------------------------------------------------------------------------|----|------|------|----------|-------------------------------------------------------------------------------------------------------------------------------------------------------------------------------------------------------------------------------------------------------------------------------------------------------------------------------------------------------------------------------------------------------------------------------------------------------------------------------------------------------------------------------------------------------------------------------------------------------------|---------------------------------------------------------------------------------------------------------------------------------------------------------------------------------|
| GO:0006950 | response to stress                                                      | 24 | 3267 | 0.31 | 1.25E-02 | 9606.ENSP00000233057,9606.ENSP00000263121,9606.ENSP00000269701,9606.ENSP00000304236,9606.ENSP00000315768,9606.ENSP00000333657,9606.ENSP00000343023,9606.ENSP00000349436,9606.ENSP00000354394,9606.ENSP00000359490,9606.ENSP00000359787,9606.ENSP00000360869,9606.ENSP00000360883,9606.ENSP00000365402,9606.ENSP00000369927,9606.ENSP00000379873,9606.ENSP00000381601,9606.ENSP00000385205,9606.ENSP00000388001,9606.ENSP00000395590,9606.ENSP00000399168,9606.ENSP00000399888,9606.ENSP00000418194,9606.ENSP00000482335                                                                                     | EIF2AK2,SMARCB1,AKAP8,CD14,STAT2,MX2,SP100,ADAM15,STAT1,GBP4,IFI44L,IFIT1,IFIT3,HLA-C,AKR1C3,HLA-A,MX1,PICK1,OAS1,IFI35,HLA-B,HMGA1,PARP14,MAP7                                 |
| GO:0070887 | cellular response to chemical stimulus                                  | 21 | 2672 | 0.34 | 1.35E-02 | 9606.ENSP00000233057,9606.ENSP00000256722,9606.ENSP00000269701,9606.ENSP00000304236,9606.ENSP00000315768,9606.ENSP00000320485,9606.ENSP00000333657,9606.ENSP00000343023,9606.ENSP00000349436,9606.ENSP00000354394,9606.ENSP00000359490,9606.ENSP00000360869,9606.ENSP00000360883,9606.ENSP00000365402,9606.ENSP00000369927,9606.ENSP00000379873,9606.ENSP00000381601,9606.ENSP00000385205,9606.ENSP00000388001,9606.ENSP00000395590,9606.ENSP00000399168                                                                                                                                                    | EIF2AK2,CMPK2,AKAP8,CD14,STAT2,ARID1A,MX2,SP100,ADAM15,STAT1,GBP4,IFIT1,IFIT3,HLA-C,AKR1C3,HLA-A,MX1,PICK1,OAS1,IFI35,HLA-B                                                     |
| GO:0003374 | dynamin family protein polymerization involved in mitochondrial fission | 2  | 7    | 1.9  | 1.55E-02 | 9606.ENSP00000333657,9606.ENSP00000381601                                                                                                                                                                                                                                                                                                                                                                                                                                                                                                                                                                   | MX2,MX1                                                                                                                                                                         |
| GO:0046719 | regulation by virus of viral protein levels in host cell                | 2  | 8    | 1.84 | 1.84E-02 | 9606.ENSP00000354394,9606.ENSP00000360869                                                                                                                                                                                                                                                                                                                                                                                                                                                                                                                                                                   | STAT1,IFIT1                                                                                                                                                                     |
| GO:0051234 | establishment of localization                                           | 28 | 4248 | 0.26 | 1.84E-02 | 9606.ENSP00000229379,9606.ENSP00000261517,9606.ENSP00000269701,9606.ENSP00000270176,9606.ENSP00000271638,9606.ENSP00000285737,9606.ENSP00000304236,9606.ENSP00000310275,9606.ENSP00000320485,9606.ENSP00000328325,9606.ENSP00000333657,9606.ENSP00000346015,9606.ENSP00000354730,9606.ENSP00000357709,9606.ENSP00000360869,9606.ENSP00000365402,9606.ENSP00000367123,9606.ENSP00000369927,9606.ENSP00000377390,9606.ENSP00000377470,9606.ENSP00000379873,9606.ENSP00000385205,9606.ENSP00000399168,9606.ENSP00000399888,9606.ENSP00000405926,9606.ENSP00000438527,9606.ENSP00000454303,9606.ENSP00000467141 | COX6A1,VPS13C,AKAP8,SCYL1,S100A11,LONP2,CD14,BANF1,ARID1A,PTTG1IP,MX2,RPL27A,CHAMP1,S100A6,IFIT1,HLA-C,SLC3A2,AKR1C3,PPP6R3,CNP,HLA-A,PICK1,HLA-B,HMGA1,TMED7,ZC3H11A,AP5B1,TTN |
| GO:0075713 | establishment of integrated proviral latency                            | 2  | 8    | 1.84 | 1.84E-02 | 9606.ENSP00000310275,9606.ENSP00000399888                                                                                                                                                                                                                                                                                                                                                                                                                                                                                                                                                                   | BANF1,HMGA1                                                                                                                                                                     |

|            |                                               |    |      |      |          |                                                                                                                                                                                                                                                                                                                                                                                                                                                                                                                                                                                                                                                                            |                                                                                                                                                                                                   |
|------------|-----------------------------------------------|----|------|------|----------|----------------------------------------------------------------------------------------------------------------------------------------------------------------------------------------------------------------------------------------------------------------------------------------------------------------------------------------------------------------------------------------------------------------------------------------------------------------------------------------------------------------------------------------------------------------------------------------------------------------------------------------------------------------------------|---------------------------------------------------------------------------------------------------------------------------------------------------------------------------------------------------|
| GO:0006810 | transport                                     | 27 | 4130 | 0.26 | 2.57E-02 | 9606.ENSP00000229379,9606.ENSP00000261517,9606.ENSP00000269701,9606.ENSP00000270176,9606.ENSP00000271638,9606.ENSP00000285737,9606.ENSP00000304236,9606.ENSP00000310275,9606.ENSP00000320485,9606.ENSP00000328325,9606.ENSP00000333657,9606.ENSP00000346015,9606.ENSP00000357709,9606.ENSP00000360869,9606.ENSP00000365402,9606.ENSP00000367123,9606.ENSP00000369927,9606.ENSP00000377390,9606.ENSP00000377470,9606.ENSP00000379873,9606.ENSP00000385205,9606.ENSP00000399168,9606.ENSP00000399888,9606.ENSP00000405926,9606.ENSP00000438527,9606.ENSP00000454303,9606.ENSP00000467141                                                                                     | COX6A1,VPS13C,AKAP8,SCYL1,S100A11,LONP2,CD14,BANF1,ARID1A,PTTG1IP,MX2,RPL27A,S100A6,IFIT1,HLA-C,SLC3A2,AKR1C3,PPP6R3,CNP,HLA-A,PICK1,HLA-B,HMGA1,TMED7,ZC3H11A,AP5B1,TTN                          |
| GO:0045824 | negative regulation of innate immune response | 3  | 49   | 1.23 | 2.60E-02 | 9606.ENSP00000379873,9606.ENSP00000399168,9606.ENSP00000418194                                                                                                                                                                                                                                                                                                                                                                                                                                                                                                                                                                                                             | HLA-A,HLA-B,PARP14                                                                                                                                                                                |
| GO:0007005 | mitochondrion organization                    | 7  | 424  | 0.66 | 2.69E-02 | 9606.ENSP00000261517,9606.ENSP00000333657,9606.ENSP00000360492,9606.ENSP00000362873,9606.ENSP00000377470,9606.ENSP00000379038,9606.ENSP00000381601                                                                                                                                                                                                                                                                                                                                                                                                                                                                                                                         | VPS13C,MX2,NDUFA1,NDUFA8,CNP,TYMP,MX1                                                                                                                                                             |
| GO:0035457 | cellular response to interferon-alpha         | 2  | 12   | 1.66 | 3.25E-02 | 9606.ENSP00000360883,9606.ENSP00000388001                                                                                                                                                                                                                                                                                                                                                                                                                                                                                                                                                                                                                                  | IFIT3,OAS1                                                                                                                                                                                        |
| GO:0051179 | localization                                  | 31 | 5233 | 0.21 | 4.20E-02 | 9606.ENSP00000229379,9606.ENSP00000261517,9606.ENSP00000269701,9606.ENSP00000270176,9606.ENSP00000271638,9606.ENSP00000285737,9606.ENSP00000304236,9606.ENSP00000310275,9606.ENSP00000320485,9606.ENSP00000328325,9606.ENSP00000333657,9606.ENSP00000343023,9606.ENSP00000346015,9606.ENSP00000354730,9606.ENSP00000357709,9606.ENSP00000360869,9606.ENSP00000365402,9606.ENSP00000367123,9606.ENSP00000369927,9606.ENSP00000377390,9606.ENSP00000377470,9606.ENSP00000379873,9606.ENSP00000385205,9606.ENSP00000399168,9606.ENSP00000399888,9606.ENSP00000405926,9606.ENSP00000438527,9606.ENSP00000451162,9606.ENSP00000454303,9606.ENSP00000467141,9606.ENSP00000482335 | COX6A1,VPS13C,AKAP8,SCYL1,S100A11,LONP2,CD14,BANF1,ARID1A,PTTG1IP,MX2,SP100,RPL27A,CHAMP1,S100A6,IFIT1,HLA-C,SLC3A2,AKR1C3,PPP6R3,CNP,HLA-A,PICK1,HLA-B,HMGA1,TMED7,ZC3H11A,CEP128,AP5B1,TTN,MAP7 |
| GO:0007076 | mitotic chromosome condensation               | 2  | 15   | 1.57 | 4.41E-02 | 9606.ENSP00000269701,9606.ENSP00000467141                                                                                                                                                                                                                                                                                                                                                                                                                                                                                                                                                                                                                                  | AKAP8,TTN                                                                                                                                                                                         |
| GO:0016045 | detection of bacterium                        | 2  | 15   | 1.57 | 4.41E-02 | 9606.ENSP00000379873,9606.ENSP00000399168                                                                                                                                                                                                                                                                                                                                                                                                                                                                                                                                                                                                                                  | HLA-A,HLA-B                                                                                                                                                                                       |



T = 72 h (CoV-2), IFN $\alpha$ 16 / Untreated

| #Term ID   | Term Description   | Observed Gene Count | Background Gene Count | Strength | False Discovery Rate | Matching Proteins in Your Input (IDs)                                              | Matching Proteins in Your Input (Labels) |
|------------|--------------------|---------------------|-----------------------|----------|----------------------|------------------------------------------------------------------------------------|------------------------------------------|
| GO:0016485 | protein processing | 4                   | 142                   | 1.36     | 2.88E-02             | 9606.ENSP00000258080,9606.ENSP00000285737,9606.ENSP00000308208,9606.ENSP0000376911 | HTRA2,LONP2,MMP14,LGMN                   |

T = 72 h (CoV-2), IFNλ3 / Untreated

| #Term ID   | Term Description                              | Observed Gene Count | Background Gene Count | Strengt h | False Discovery Rate | Matching Proteins in Your Input (IDs)                                                                                                                                                                                                                                                                                                                                | Matching Proteins in Your Input (Labels)                                                          |
|------------|-----------------------------------------------|---------------------|-----------------------|-----------|----------------------|----------------------------------------------------------------------------------------------------------------------------------------------------------------------------------------------------------------------------------------------------------------------------------------------------------------------------------------------------------------------|---------------------------------------------------------------------------------------------------|
| GO:0034340 | response to type I interferon                 | 16                  | 70                    | 1.72      | 4.67E-19             | 9606.ENSP00000228928,9606.ENSP00000253110,9606.ENSP00000257570,9606.ENSP00000315768,9606.ENSP00000333657,9606.ENSP00000354394,9606.ENSP00000357459,9606.ENSP00000360883,9606.ENSP00000364016,9606.ENSP00000365402,9606.ENSP00000379873,9606.ENSP00000381601,9606.ENSP00000388001,9606.ENSP00000395590,9606.ENSP00000399168                                           | OAS3,C19orf66,OASL,STAT2,MX2,STAT1,ADAR,IFIT1,IFIT3,PSMB8,HLA-C,HLA-A,MX1,OAS1,IFI35,HLA-B        |
| GO:0060337 | type I interferon signaling pathway           | 15                  | 65                    | 1.73      | 4.56E-18             | 9606.ENSP00000228928,9606.ENSP00000257570,9606.ENSP00000315768,9606.ENSP00000333657,9606.ENSP00000354394,9606.ENSP00000357459,9606.ENSP00000360883,9606.ENSP00000364016,9606.ENSP00000365402,9606.ENSP00000379873,9606.ENSP00000381601,9606.ENSP00000388001,9606.ENSP00000395590,9606.ENSP00000399168                                                                | OAS3,OASL,STAT2,MX2,STAT1,ADAR,IFIT1,IFIT3,PSMB8,HLA-C,HLA-A,MX1,OAS1,IFI35,HLA-B                 |
| GO:0043901 | negative regulation of multi-organism process | 16                  | 212                   | 1.24      | 1.12E-12             | 9606.ENSP00000228928,9606.ENSP00000233057,9606.ENSP00000251642,9606.ENSP00000253110,9606.ENSP00000257570,9606.ENSP00000257604,9606.ENSP00000268058,9606.ENSP00000325618,9606.ENSP00000354394,9606.ENSP00000357459,9606.ENSP00000360869,9606.ENSP00000379873,9606.ENSP00000381601,9606.ENSP00000388001,9606.ENSP00000399168,9606.ENSP00000418194                      | OAS3,EIF2AK2,DHX58,C19orf66,OASL,TRAFD1,PML,PARP10,STAT1,ADAR,IFIT1,HLA-A,MX1,OAS1,HLA-B,PARP14   |
| GO:0009615 | response to virus                             | 17                  | 270                   | 1.16      | 1.86E-12             | 9606.ENSP00000228928,9606.ENSP00000233057,9606.ENSP00000251642,9606.ENSP00000253110,9606.ENSP00000257570,9606.ENSP00000268058,9606.ENSP00000315768,9606.ENSP00000333657,9606.ENSP00000354394,9606.ENSP00000357459,9606.ENSP00000359783,9606.ENSP00000359787,9606.ENSP00000360869,9606.ENSP00000360883,9606.ENSP00000381601,9606.ENSP00000388001,9606.ENSP00000399888 | OAS3,EIF2AK2,DHX58,C19orf66,OASL,PML,STAT2,MX2,STAT1,ADAR,IFI44,IFI44L,IFIT1,IFIT3,MX1,OAS1,HMGA1 |
| GO:0051607 | defense response to virus                     | 15                  | 181                   | 1.28      | 1.86E-12             | 9606.ENSP00000228928,9606.ENSP00000233057,9606.ENSP00000251642,9606.ENSP00000253110,9606.ENSP00000257570,9606.ENSP00000268058,9606.ENSP00000315768,9606.ENSP00000333657,9606.ENSP00000354394,9606.ENSP00000357459,9606.ENSP00000359787,9606.ENSP00000360869,9606.ENSP00000360883,9606.ENSP00000381601,9606.ENSP00000388001                                           | OAS3,EIF2AK2,DHX58,C19orf66,OASL,PML,STAT2,MX2,STAT1,ADAR,IFI44L,IFIT1,IFIT3,MX1,OAS1             |
| GO:0048525 | negative regulation of viral process          | 11                  | 93                    | 1.43      | 2.12E-10             | 9606.ENSP00000228928,9606.ENSP00000233057,9606.ENSP00000253110,9606.ENSP00000257570,9606.ENSP00000268058,9606.ENSP00000325618,9606.ENSP00000354394,9606.ENSP00000357459,9606.ENSP00000360869,9606.ENSP00000381601,9606.ENSP00000388001                                                                                                                               | OAS3,EIF2AK2,C19orf66,OASL,PML,PARP10,STAT1,ADAR,IFIT1,MX1,OAS1                                   |

|            |                                                 |    |      |      |          |                                                                                                                                                                                                                                                                                                                                                                                                                                                                                                                                                                                                                      |                                                                                                                                                                                 |
|------------|-------------------------------------------------|----|------|------|----------|----------------------------------------------------------------------------------------------------------------------------------------------------------------------------------------------------------------------------------------------------------------------------------------------------------------------------------------------------------------------------------------------------------------------------------------------------------------------------------------------------------------------------------------------------------------------------------------------------------------------|---------------------------------------------------------------------------------------------------------------------------------------------------------------------------------|
| GO:0045087 | innate immune response                          | 21 | 676  | 0.85 | 3.06E-10 | 9606. ENSP00000228928, 9606. ENSP00000233057, 9606. ENSP00000251642, 9606. ENSP00000253110, 9606. ENSP00000257570, 9606. ENSP00000268058, 9606. ENSP00000269701, 9606. ENSP00000315768, 9606. ENSP00000333657, 9606. ENSP00000354394, 9606. ENSP00000357459, 9606. ENSP00000360869, 9606. ENSP00000360883, 9606. ENSP00000364016, 9606. ENSP00000365402, 9606. ENSP00000379873, 9606. ENSP00000381601, 9606. ENSP00000388001, 9606. ENSP00000395590, 9606. ENSP00000399168, 9606. ENSP00000418194                                                                                                                    | OAS3, EIF2AK2, DHX58, C19orf66, OASL, PML, AKAP8, STAT2, MX2, STAT1, ADAR, IFIT1, IFIT3, PSMB8, HLA-C, HLA-A, MX1, OAS1, IFI35, HLA-B, PARP14                                   |
| GO:0051707 | response to other organism                      | 26 | 1173 | 0.71 | 6.32E-10 | 9606. ENSP00000228928, 9606. ENSP00000233057, 9606. ENSP00000251642, 9606. ENSP00000253110, 9606. ENSP00000256722, 9606. ENSP00000257570, 9606. ENSP00000268058, 9606. ENSP00000269701, 9606. ENSP00000315768, 9606. ENSP00000333657, 9606. ENSP00000354394, 9606. ENSP00000357459, 9606. ENSP00000359783, 9606. ENSP00000359787, 9606. ENSP00000360869, 9606. ENSP00000360883, 9606. ENSP00000364016, 9606. ENSP00000365402, 9606. ENSP00000377470, 9606. ENSP00000379873, 9606. ENSP00000381601, 9606. ENSP00000388001, 9606. ENSP00000395590, 9606. ENSP00000399168, 9606. ENSP00000399888, 9606. ENSP00000418194 | OAS3, EIF2AK2, DHX58, C19orf66, CMPK2, OASL, PML, AKAP8, STAT2, MX2, STAT1, ADAR, IFI44, IFI44L, IFIT1, IFIT3, PSMB8, HLA-C, CNP, HLA-A, MX1, OAS1, IFI35, HLA-B, HMG1A, PARP14 |
| GO:1903901 | negative regulation of viral life cycle         | 10 | 77   | 1.48 | 6.70E-10 | 9606. ENSP00000228928, 9606. ENSP00000233057, 9606. ENSP00000253110, 9606. ENSP00000257570, 9606. ENSP00000268058, 9606. ENSP00000325618, 9606. ENSP00000357459, 9606. ENSP00000360869, 9606. ENSP00000381601, 9606. ENSP00000388001                                                                                                                                                                                                                                                                                                                                                                                 | OAS3, EIF2AK2, C19orf66, OASL, PML, PARP10, ADAR, IFIT1, MX1, OAS1                                                                                                              |
| GO:0045071 | negative regulation of viral genome replication | 9  | 52   | 1.6  | 7.51E-10 | 9606. ENSP00000228928, 9606. ENSP00000233057, 9606. ENSP00000253110, 9606. ENSP00000257570, 9606. ENSP00000325618, 9606. ENSP00000357459, 9606. ENSP00000360869, 9606. ENSP00000381601, 9606. ENSP00000388001                                                                                                                                                                                                                                                                                                                                                                                                        | OAS3, EIF2AK2, C19orf66, OASL, PARP10, ADAR, IFIT1, MX1, OAS1                                                                                                                   |
| GO:0098542 | defense response to other organism              | 22 | 859  | 0.77 | 1.87E-09 | 9606. ENSP00000228928, 9606. ENSP00000233057, 9606. ENSP00000251642, 9606. ENSP00000253110, 9606. ENSP00000257570, 9606. ENSP00000268058, 9606. ENSP00000269701, 9606. ENSP00000315768, 9606. ENSP00000333657, 9606. ENSP00000354394, 9606. ENSP00000357459, 9606. ENSP00000359787, 9606. ENSP00000360869, 9606. ENSP00000360883, 9606. ENSP00000364016, 9606. ENSP00000365402, 9606. ENSP00000379873, 9606. ENSP00000381601, 9606. ENSP00000388001, 9606. ENSP00000395590, 9606. ENSP00000399168, 9606. ENSP00000418194                                                                                             | OAS3, EIF2AK2, DHX58, C19orf66, OASL, PML, AKAP8, STAT2, MX2, STAT1, ADAR, IFI44L, IFIT1, IFIT3, PSMB8, HLA-C, HLA-A, MX1, OAS1, IFI35, HLA-B, PARP14                           |
| GO:0006952 | defense response                                | 25 | 1234 | 0.67 | 7.39E-09 | 9606. ENSP00000228928, 9606. ENSP00000233057, 9606. ENSP00000249066, 9606. ENSP00000251642, 9606. ENSP00000253110, 9606. ENSP00000257570, 9606. ENSP00000262776, 9606. ENSP00000268058, 9606. ENSP00000269701, 9606. ENSP00000315768, 9606. ENSP00000333657, 9606. ENSP00000354394, 9606. ENSP00000357459, 9606. ENSP00000359787, 9606. ENSP00000360869, 9606. ENSP00000360883, 9606. ENSP00000364016, 9606. ENSP00000365402, 9606. ENSP00000379873, 9606. ENSP00000381601, 9606. ENSP00000388001, 9606. ENSP00000395590, 9606. ENSP00000399168, 9606. ENSP00000418194, 9606. ENSP00000428845                        | OAS3, EIF2AK2, APOL2, DHX58, C19orf66, OASL, LGALS3BP, PML, AKAP8, STAT2, MX2, STAT1, ADAR, IFI44L, IFIT1, IFIT3, PSMB8, HLA-C, HLA-A, MX1, OAS1, IFI35, HLA-B, PARP14, VDAC3   |

|            |                                                                     |    |      |      |          |                                                                                                                                                                                                                                                                                                                                                                                                                                                                                                                                                                                                                                                                                                 |                                                                                                                                                                                             |
|------------|---------------------------------------------------------------------|----|------|------|----------|-------------------------------------------------------------------------------------------------------------------------------------------------------------------------------------------------------------------------------------------------------------------------------------------------------------------------------------------------------------------------------------------------------------------------------------------------------------------------------------------------------------------------------------------------------------------------------------------------------------------------------------------------------------------------------------------------|---------------------------------------------------------------------------------------------------------------------------------------------------------------------------------------------|
| GO:0000184 | nuclear-transcribed mRNA catabolic process, nonsense-mediated decay | 10 | 118  | 1.29 | 2.27E-08 | 9606.ENSP00000296674,9606.ENSP00000339095,9606.ENSP00000346015,9606.ENSP00000379506,9606.ENSP00000386717,9606.ENSP00000393241,9606.ENSP00000398131,9606.ENSP00000416429,9606.ENSP00000464342,9606.ENSP00000464813                                                                                                                                                                                                                                                                                                                                                                                                                                                                               | RPS23,RPS7,RPL27A,RPL14,RPL31,RPS18,GSPT1,RPL32,RPL36,RPL27                                                                                                                                 |
| GO:0006614 | SRP-dependent cotranslational protein targeting to membrane         | 9  | 92   | 1.35 | 4.96E-08 | 9606.ENSP00000296674,9606.ENSP00000339095,9606.ENSP00000346015,9606.ENSP00000379506,9606.ENSP00000386717,9606.ENSP00000393241,9606.ENSP00000416429,9606.ENSP00000464342,9606.ENSP00000464813                                                                                                                                                                                                                                                                                                                                                                                                                                                                                                    | RPS23,RPS7,RPL27A,RPL14,RPL31,RPS18,RPL32,RPL36,RPL27                                                                                                                                       |
| GO:0060333 | interferon-gamma-mediated signaling pathway                         | 8  | 69   | 1.43 | 1.14E-07 | 9606.ENSP00000228928,9606.ENSP00000257570,9606.ENSP00000268058,9606.ENSP00000354394,9606.ENSP00000365402,9606.ENSP00000379873,9606.ENSP00000388001,9606.ENSP00000399168                                                                                                                                                                                                                                                                                                                                                                                                                                                                                                                         | OAS3,OASL,PML,STAT1,HLA-C,HLA-A,OAS1,HLA-B                                                                                                                                                  |
| GO:0002252 | immune effector process                                             | 20 | 927  | 0.7  | 1.87E-07 | 9606.ENSP00000228928,9606.ENSP00000233057,9606.ENSP00000251642,9606.ENSP00000253110,9606.ENSP00000257570,9606.ENSP00000260118,9606.ENSP00000268058,9606.ENSP0000028928,9606.ENSP00000315768,9606.ENSP00000333657,9606.ENSP00000354394,9606.ENSP00000357459,9606.ENSP00000359787,9606.ENSP00000360869,9606.ENSP00000360883,9606.ENSP00000365402,9606.ENSP00000379873,9606.ENSP00000381601,9606.ENSP00000388001,9606.ENSP00000399168                                                                                                                                                                                                                                                              | OAS3,EIF2AK2,DHX58,C19orf66,OASL,GGH,PML,ACTR1B,STAT2,MX2,STAT1,ADAR,IFI44L,IFIT1,IFIT3,HLA-C,HLA-A,MX1,OAS1,HLA-B                                                                          |
| GO:0034097 | response to cytokine                                                | 21 | 1035 | 0.67 | 1.94E-07 | 9606.ENSP00000228928,9606.ENSP00000233057,9606.ENSP00000253110,9606.ENSP00000257570,9606.ENSP00000257604,9606.ENSP00000258080,9606.ENSP00000268058,9606.ENSP00000290573,9606.ENSP00000315768,9606.ENSP00000333657,9606.ENSP00000354394,9606.ENSP00000357459,9606.ENSP00000360869,9606.ENSP00000360883,9606.ENSP00000364016,9606.ENSP00000365402,9606.ENSP00000379873,9606.ENSP00000381601,9606.ENSP00000388001,9606.ENSP00000395590,9606.ENSP00000399168                                                                                                                                                                                                                                        | OAS3,EIF2AK2,C19orf66,OASL,TRAFD1,HTRA2,PML,HK2,STAT2,MX2,STAT1,ADAR,IFIT1,IFIT3,PSMB8,HLA-C,HLA-A,MX1,OAS1,IFI35,HLA-B                                                                     |
| GO:0051704 | multi-organism process                                              | 32 | 2514 | 0.47 | 4.74E-07 | 9606.ENSP00000228928,9606.ENSP00000233057,9606.ENSP00000249066,9606.ENSP00000251642,9606.ENSP00000253110,9606.ENSP00000256722,9606.ENSP00000257570,9606.ENSP00000261574,9606.ENSP00000268058,9606.ENSP00000269701,9606.ENSP00000270586,9606.ENSP00000315768,9606.ENSP00000333657,9606.ENSP00000354394,9606.ENSP00000357459,9606.ENSP00000359300,9606.ENSP00000359783,9606.ENSP00000359787,9606.ENSP00000360869,9606.ENSP00000360883,9606.ENSP00000363993,9606.ENSP00000364016,9606.ENSP00000365402,9606.ENSP00000377470,9606.ENSP00000379873,9606.ENSP00000381601,9606.ENSP00000388001,9606.ENSP00000392985,9606.ENSP00000395590,9606.ENSP00000399168,9606.ENSP00000399888,9606.ENSP00000418194 | OAS3,EIF2AK2,APOL2,DHX58,C19orf66,CMPK2,OASL,IPO5,PML,AKAP8,PSMB6,STAT2,MX2,STAT1,ADAR,CETN2,IFI44,IFI44L,IFIT1,IFIT3,PSMB9,PSMB8,HLA-C,CNP,HLA-A,MX1,OAS1,HTATIP2,IFI35,HLA-B,HMGA1,PARP14 |
| GO:0002181 | cytoplasmic translation                                             | 7  | 57   | 1.45 | 6.58E-07 | 9606.ENSP00000296674,9606.ENSP00000339095,9606.ENSP00000346015,9606.ENSP00000386717,9606.ENSP00000398131,9606.ENSP00000416429,9606.ENSP00000464342                                                                                                                                                                                                                                                                                                                                                                                                                                                                                                                                              | RPS23,RPS7,RPL27A,RPL31,GSPT1,RPL32,RPL36                                                                                                                                                   |
| GO:0006413 | translational initiation                                            | 9  | 142  | 1.16 | 1.01E-06 | 9606.ENSP00000296674,9606.ENSP00000339095,9606.ENSP00000346015,9606.ENSP00000379506,9606.ENSP00000386717,9606.ENSP00000393241,9606.ENSP00000416429,9606.ENSP00000464342,9606.ENSP00000464813                                                                                                                                                                                                                                                                                                                                                                                                                                                                                                    | RPS23,RPS7,RPL27A,RPL14,RPL31,RPS18,RPL32,RPL36,RPL27                                                                                                                                       |

|            |                                                    |    |      |      |          |                                                                                                                                                                                                                                                                                                                                                                                                                                                                                                                        |                                                                                                                                            |
|------------|----------------------------------------------------|----|------|------|----------|------------------------------------------------------------------------------------------------------------------------------------------------------------------------------------------------------------------------------------------------------------------------------------------------------------------------------------------------------------------------------------------------------------------------------------------------------------------------------------------------------------------------|--------------------------------------------------------------------------------------------------------------------------------------------|
| GO:0034655 | nucleobase-containing compound catabolic process   | 13 | 394  | 0.88 | 1.09E-06 | 9606.ENSP00000290573,9606.ENSP00000296674,9606.ENSP00000339095,9606.ENSP00000346015,9606.ENSP00000377470,9606.ENSP00000379038,9606.ENSP00000379506,9606.ENSP00000386717,9606.ENSP00000393241,9606.ENSP00000398131,9606.ENSP00000416429,9606.ENSP00000464342,9606.ENSP00000464813                                                                                                                                                                                                                                       | HK2,RPS23,RPS7,RPL27A,CNP,TYMP,RPL14,RPL31,RPS18,GSPT1,RPL32,RPL36,RPL27                                                                   |
| GO:0072594 | establishment of protein localization to organelle | 13 | 396  | 0.88 | 1.12E-06 | 9606.ENSP00000261574,9606.ENSP00000268058,9606.ENSP00000290573,9606.ENSP00000296674,9606.ENSP00000339095,9606.ENSP00000346015,9606.ENSP00000357459,9606.ENSP00000379506,9606.ENSP00000386717,9606.ENSP00000393241,9606.ENSP00000416429,9606.ENSP00000464342,9606.ENSP00000464813                                                                                                                                                                                                                                       | IPO5,PML,HK2,RPS23,RPS7,RPL27A,ADAR,RPL14,RPL31,RPS18,RPL32,RPL36,RPL27                                                                    |
| GO:0019221 | cytokine-mediated signaling pathway                | 16 | 655  | 0.75 | 1.23E-06 | 9606.ENSP00000228928,9606.ENSP00000257570,9606.ENSP00000268058,9606.ENSP00000315768,9606.ENSP0000033657,9606.ENSP00000354394,9606.ENSP00000357459,9606.ENSP00000360883,9606.ENSP00000364016,9606.ENSP00000365402,9606.ENSP00000379873,9606.ENSP00000381601,9606.ENSP00000388001,9606.ENSP00000395590,9606.ENSP00000399168                                                                                                                                                                                              | OAS3,OASL,PML,STAT2,MX2,STAT1,ADAR,IFIT1,IFIT3,PSMB8,HLA-C,HLA-A,MX1,OAS1,IFI35,HLA-B                                                      |
| GO:0016032 | viral process                                      | 15 | 571  | 0.78 | 1.37E-06 | 9606.ENSP00000233057,9606.ENSP00000251642,9606.ENSP00000261574,9606.ENSP00000268058,9606.ENSP00000270586,9606.ENSP00000315768,9606.ENSP00000354394,9606.ENSP00000360883,9606.ENSP00000363993,9606.ENSP00000364016,9606.ENSP00000365402,9606.ENSP00000379873,9606.ENSP00000392985,9606.ENSP00000399168,9606.ENSP00000399888                                                                                                                                                                                             | EIF2AK2,DHX58,IPO5,PML,PSMB6,STAT2,STAT1,IFIT1,PSMB9,PSMB8,HLA-C,HLA-A,HTATIP2,HLA-B,HMGA1                                                 |
| GO:0006955 | immune response                                    | 24 | 1560 | 0.55 | 1.57E-06 | 9606.ENSP00000228928,9606.ENSP00000233057,9606.ENSP00000251642,9606.ENSP00000253110,9606.ENSP00000257570,9606.ENSP00000260118,9606.ENSP00000268058,9606.ENSP00000269701,9606.ENSP00000289228,9606.ENSP00000315768,9606.ENSP0000033657,9606.ENSP00000354394,9606.ENSP00000357459,9606.ENSP00000360883,9606.ENSP00000360883,9606.ENSP00000364016,9606.ENSP00000365402,9606.ENSP00000379873,9606.ENSP00000381601,9606.ENSP00000388001,9606.ENSP00000395590,9606.ENSP00000399168,9606.ENSP00000404833,9606.ENSP00000418194 | OAS3,EIF2AK2,DHX58,C19orf66,OASL,GGH,PML,AKAP8,ACTR1B,STAT2,MX2,STAT1,ADAR,IFIT1,IFIT3,PSMB8,HLA-C,HLA-A,MX1,OAS1,IFI35,HLA-B,TAPBP,PARP14 |
| GO:0006518 | peptide metabolic process                          | 14 | 497  | 0.81 | 1.68E-06 | 9606.ENSP00000225719,9606.ENSP00000233057,9606.ENSP00000296674,9606.ENSP00000339095,9606.ENSP00000346015,9606.ENSP00000347495,9606.ENSP00000379506,9606.ENSP00000386717,9606.ENSP00000393241,9606.ENSP00000398131,9606.ENSP00000404833,9606.ENSP00000416429,9606.ENSP00000464342,9606.ENSP00000464813                                                                                                                                                                                                                  | CPD,EIF2AK2,RPS23,RPS7,RPL27A,WARS,RPL14,RPL31,RPS18,GSPT1,TAPBP,RPL32,RPL36,RPL27                                                         |
| GO:0006412 | translation                                        | 12 | 362  | 0.88 | 3.09E-06 | 9606.ENSP00000233057,9606.ENSP00000296674,9606.ENSP00000339095,9606.ENSP00000346015,9606.ENSP00000347495,9606.ENSP00000379506,9606.ENSP00000386717,9606.ENSP00000393241,9606.ENSP00000398131,9606.ENSP00000416429,9606.ENSP00000464342,9606.ENSP00000464813                                                                                                                                                                                                                                                            | EIF2AK2,RPS23,RPS7,RPL27A,WARS,RPL14,RPL31,RPS18,GSPT1,RPL32,RPL36,RPL27                                                                   |
| GO:0035455 | response to interferon-alpha                       | 5  | 22   | 1.72 | 4.01E-06 | 9606.ENSP00000233057,9606.ENSP0000033657,9606.ENSP00000357459,9606.ENSP00000360883,9606.ENSP00000388001                                                                                                                                                                                                                                                                                                                                                                                                                | EIF2AK2,MX2,ADAR,IFIT3,OAS1                                                                                                                |

|            |                                                                                   |    |      |      |          |                                                                                                                                                                                                                                                                                                                                                                                                                                                                                                                                                                                        |                                                                                                                                                             |
|------------|-----------------------------------------------------------------------------------|----|------|------|----------|----------------------------------------------------------------------------------------------------------------------------------------------------------------------------------------------------------------------------------------------------------------------------------------------------------------------------------------------------------------------------------------------------------------------------------------------------------------------------------------------------------------------------------------------------------------------------------------|-------------------------------------------------------------------------------------------------------------------------------------------------------------|
| GO:0034341 | response to interferon-gamma                                                      | 9  | 176  | 1.07 | 4.11E-06 | 9606.ENSP00000228928,9606.ENSP00000253110,9606.ENSP00000257570,9606.ENSP00000268058,9606.ENSP00000354394,9606.ENSP00000365402,9606.ENSP00000379873,9606.ENSP0000038801,9606.ENSP00000399168                                                                                                                                                                                                                                                                                                                                                                                            | OAS3,C19orf66,OASL,PML,STAT1,HLA-C,HLA-A,OAS1,HLA-B                                                                                                         |
| GO:0043603 | cellular amide metabolic process                                                  | 16 | 732  | 0.7  | 4.25E-06 | 9606.ENSP00000225719,9606.ENSP00000233057,9606.ENSP00000258080,9606.ENSP00000260118,9606.ENSP00000296674,9606.ENSP00000339095,9606.ENSP00000346015,9606.ENSP00000347495,9606.ENSP00000379506,9606.ENSP00000386717,9606.ENSP00000393241,9606.ENSP00000398131,9606.ENSP00000404833,9606.ENSP00000416429,9606.ENSP00000464342,9606.ENSP00000464813                                                                                                                                                                                                                                        | CPD,EIF2AK2,HTRA2,GGH,RPS23,RPS7,RPL27A,WARS,RPL14,RPL31,RPS18,GSPT1,TAPBP,RPL32,RPL36,RPL27                                                                |
| GO:0044265 | cellular macromolecule catabolic process                                          | 17 | 842  | 0.67 | 4.70E-06 | 9606.ENSP00000258080,9606.ENSP00000268058,9606.ENSP00000270586,9606.ENSP00000296674,9606.ENSP00000333266,9606.ENSP00000339095,9606.ENSP00000346015,9606.ENSP00000363993,9606.ENSP00000364016,9606.ENSP00000379506,9606.ENSP00000386717,9606.ENSP00000393241,9606.ENSP00000398131,9606.ENSP00000416429,9606.ENSP00000464087,9606.ENSP00000464342,9606.ENSP00000464813                                                                                                                                                                                                                   | HTRA2,PML,PSMB6,RPS23,UBA7,RPS7,RPL27A,PSMB9,PSMB8,RPL14,RPL31,RPS18,GSPT1,RPL32,RNF213,RPL36,RPL27                                                         |
| GO:0045824 | negative regulation of innate immune response                                     | 6  | 49   | 1.45 | 4.78E-06 | 9606.ENSP00000251642,9606.ENSP00000257604,9606.ENSP00000357459,9606.ENSP00000379873,9606.ENSP00000399168,9606.ENSP00000418194                                                                                                                                                                                                                                                                                                                                                                                                                                                          | DHX58,TRAFD1,ADAR,HLA-A,HLA-B,PARP14                                                                                                                        |
| GO:0071345 | cellular response to cytokine stimulus                                            | 18 | 953  | 0.64 | 4.82E-06 | 9606.ENSP00000228928,9606.ENSP00000257570,9606.ENSP00000258080,9606.ENSP00000268058,9606.ENSP00000290573,9606.ENSP00000315768,9606.ENSP00000333657,9606.ENSP00000354394,9606.ENSP00000357459,9606.ENSP00000360869,9606.ENSP00000360883,9606.ENSP00000364016,9606.ENSP00000365402,9606.ENSP00000379873,9606.ENSP00000381601,9606.ENSP00000388001,9606.ENSP00000395590,9606.ENSP00000399168                                                                                                                                                                                              | OAS3,OASL,HTRA2,PML,HK2,STAT2,MX2,STAT1,ADAR,IFIT1,IFIT3,PSMB8,HLA-C,HLA-A,MX1,OAS1,IFI35,HLA-B                                                             |
| GO:0002832 | negative regulation of response to biotic stimulus                                | 7  | 85   | 1.28 | 4.83E-06 | 9606.ENSP00000251642,9606.ENSP00000257604,9606.ENSP00000357459,9606.ENSP00000360869,9606.ENSP00000379873,9606.ENSP00000399168,9606.ENSP00000418194                                                                                                                                                                                                                                                                                                                                                                                                                                     | DHX58,TRAFD1,ADAR,IFIT1,HLA-A,HLA-B,PARP14                                                                                                                  |
| GO:0019885 | antigen processing and presentation of endogenous peptide antigen via MHC class I | 4  | 9    | 2.01 | 7.22E-06 | 9606.ENSP00000365402,9606.ENSP00000379873,9606.ENSP00000399168,9606.ENSP00000404833                                                                                                                                                                                                                                                                                                                                                                                                                                                                                                    | HLA-C,HLA-A,HLA-B,TAPBP                                                                                                                                     |
| GO:0009605 | response to external stimulus                                                     | 27 | 2152 | 0.46 | 7.63E-06 | 9606.ENSP00000228928,9606.ENSP00000233057,9606.ENSP00000251642,9606.ENSP00000253110,9606.ENSP00000256722,9606.ENSP00000257570,9606.ENSP00000268058,9606.ENSP00000269701,9606.ENSP00000315768,9606.ENSP00000333657,9606.ENSP00000354394,9606.ENSP00000357459,9606.ENSP00000359783,9606.ENSP00000359787,9606.ENSP00000360869,9606.ENSP00000360883,9606.ENSP00000364016,9606.ENSP00000365402,9606.ENSP00000377470,9606.ENSP00000379038,9606.ENSP00000379873,9606.ENSP00000381601,9606.ENSP00000388001,9606.ENSP00000395590,9606.ENSP00000399168,9606.ENSP00000399888,9606.ENSP00000418194 | OAS3,EIF2AK2,DHX58,C19orf66,CMPK2,OASL,PML,AKAP8,STAT2,MX2,STAT1,ADAR,IFI44,IFI44L,IFIT1,IFIT3,PSMB8,HLA-C,CNP,TYMP,HLA-A,MX1,OAS1,IFI35,HLA-B,HMG1A,PARP14 |

|            |                                                                                                                   |    |      |      |          |                                                                                                                                                                                                                                                                                                                                                                                                                                                                                                                                                                                                                                                                                                                                                                                                                                                                                                                   |                                                                                                                                                                                                                                                      |
|------------|-------------------------------------------------------------------------------------------------------------------|----|------|------|----------|-------------------------------------------------------------------------------------------------------------------------------------------------------------------------------------------------------------------------------------------------------------------------------------------------------------------------------------------------------------------------------------------------------------------------------------------------------------------------------------------------------------------------------------------------------------------------------------------------------------------------------------------------------------------------------------------------------------------------------------------------------------------------------------------------------------------------------------------------------------------------------------------------------------------|------------------------------------------------------------------------------------------------------------------------------------------------------------------------------------------------------------------------------------------------------|
| GO:0016071 | mRNA metabolic process                                                                                            | 14 | 667  | 0.68 | 3.45E-05 | 9606.ENSP00000293677,9606.ENSP00000296674,9606.ENSP00000339095,9606.ENSP00000346015,9606.ENSP00000357459,9606.ENSP00000374399,9606.ENSP00000379506,9606.ENSP00000386717,9606.ENSP00000393241,9606.ENSP00000398131,9606.ENSP00000400591,9606.ENSP00000416429,9606.ENSP00000464342,9606.ENSP00000464813                                                                                                                                                                                                                                                                                                                                                                                                                                                                                                                                                                                                             | RAVER1,RPS23,RPS7,RPL27A,ADAR,TRMT61A,RPL14,RPL31,RPS18,GSPT1,SNRPE,RPL32,RPL36,RPL27                                                                                                                                                                |
| GO:1901566 | organonitrogen compound biosynthetic process                                                                      | 20 | 1370 | 0.53 | 3.91E-05 | 9606.ENSP00000233057,9606.ENSP00000256722,9606.ENSP00000290573,9606.ENSP00000296674,9606.ENSP00000300688,9606.ENSP00000325618,9606.ENSP00000339095,9606.ENSP00000346015,9606.ENSP00000347495,9606.ENSP00000356978,9606.ENSP00000379038,9606.ENSP00000379506,9606.ENSP00000386717,9606.ENSP00000388001,9606.ENSP00000393241,9606.ENSP00000398131,9606.ENSP00000416429,9606.ENSP00000417901,9606.ENSP00000464342,9606.ENSP00000464813                                                                                                                                                                                                                                                                                                                                                                                                                                                                               | EIF2AK2,CMPK2,HK2,RPS23,ATP5L,PARP10,RPS7,RPL27A,WARS,PPOX,TYMP,RPL14,RPL31,OAS1,RPS18,GSPT1,RPL32,GPHN,RPL36,RPL27                                                                                                                                  |
| GO:0006605 | protein targeting                                                                                                 | 10 | 318  | 0.86 | 4.10E-05 | 9606.ENSP00000268058,9606.ENSP00000296674,9606.ENSP00000339095,9606.ENSP00000346015,9606.ENSP00000379506,9606.ENSP00000386717,9606.ENSP00000393241,9606.ENSP00000416429,9606.ENSP00000464342,9606.ENSP00000464813                                                                                                                                                                                                                                                                                                                                                                                                                                                                                                                                                                                                                                                                                                 | PML,RPS23,RPS7,RPL27A,RPL14,RPL31,RPS18,RPL32,RPL36,RPL27                                                                                                                                                                                            |
| GO:0002486 | antigen processing and presentation of endogenous peptide antigen via MHC class I via ER pathway, TAP-independent | 3  | 3    | 2.36 | 4.14E-05 | 9606.ENSP00000365402,9606.ENSP00000379873,9606.ENSP00000399168                                                                                                                                                                                                                                                                                                                                                                                                                                                                                                                                                                                                                                                                                                                                                                                                                                                    | HLA-C,HLA-A,HLA-B                                                                                                                                                                                                                                    |
| GO:0046907 | intracellular transport                                                                                           | 20 | 1390 | 0.52 | 4.59E-05 | 9606.ENSP00000261517,9606.ENSP00000261574,9606.ENSP00000268058,9606.ENSP00000296674,9606.ENSP00000300688,9606.ENSP00000339095,9606.ENSP00000346015,9606.ENSP00000357459,9606.ENSP00000360869,9606.ENSP00000377390,9606.ENSP00000379506,9606.ENSP00000386717,9606.ENSP00000392985,9606.ENSP00000393241,9606.ENSP00000399888,9606.ENSP00000400591,9606.ENSP00000405926,9606.ENSP00000416429,9606.ENSP00000464342,9606.ENSP00000464813                                                                                                                                                                                                                                                                                                                                                                                                                                                                               | VPS13C,IPO5,PML,RPS23,ATP5L,RPS7,RPL27A,ADAR,IFIT1,PPP6R3,RPL14,RPL31,HTATIP2,RPS18,HMGA1,SNRPE,TMED7,RPL32,RPL36,RPL27                                                                                                                              |
| GO:0034641 | cellular nitrogen compound metabolic process                                                                      | 42 | 5126 | 0.28 | 1.10E-04 | 9606.ENSP00000225719,9606.ENSP00000228928,9606.ENSP00000233057,9606.ENSP00000256722,9606.ENSP00000258080,9606.ENSP00000260118,9606.ENSP00000267935,9606.ENSP00000268058,9606.ENSP00000269701,9606.ENSP00000290573,9606.ENSP00000293677,9606.ENSP00000296674,9606.ENSP00000300688,9606.ENSP00000315768,9606.ENSP00000325618,9606.ENSP00000339095,9606.ENSP00000346015,9606.ENSP00000347495,9606.ENSP00000354394,9606.ENSP00000356978,9606.ENSP00000357459,9606.ENSP00000359300,9606.ENSP00000367939,9606.ENSP00000374399,9606.ENSP00000377470,9606.ENSP00000379038,9606.ENSP00000379506,9606.ENSP00000386717,9606.ENSP00000388001,9606.ENSP00000393241,9606.ENSP00000398131,9606.ENSP00000399888,9606.ENSP00000400591,9606.ENSP00000404833,9606.ENSP00000410769,9606.ENSP00000416429,9606.ENSP00000417901,9606.ENSP00000418194,9606.ENSP00000420588,9606.ENSP00000464342,9606.ENSP00000464813,9606.ENSP00000479106 | CPD,OAS3,EIF2AK2,CMPK2,HTRA2,GGH,COMMD4,PML,AKAP8,HK2,RAVER1,RPS23,ATP5L,STAT2,PARP10,RPS7,RPL27A,WARS,STAT1,PPOX,ADAR,CETN2,UQCRCQ,TRMT61A,CNP,TYMP,RPL14,RPL31,OAS1,RPS18,GSPT1,HMGA1,SNRPE,TAPBP,CNBP,RPL32,GPHN,PARP14,TFAM,RPL36,RPL27,HIST1H4A |

|            |                                                 |    |      |      |          |                                                                                                                                                                                                                                                                                                                                                                                                                                                                                                                                                                                                                                                                                                                                                                                                                                                                                                                                                                               |                                                                                                                                                                                                                                                                                                   |
|------------|-------------------------------------------------|----|------|------|----------|-------------------------------------------------------------------------------------------------------------------------------------------------------------------------------------------------------------------------------------------------------------------------------------------------------------------------------------------------------------------------------------------------------------------------------------------------------------------------------------------------------------------------------------------------------------------------------------------------------------------------------------------------------------------------------------------------------------------------------------------------------------------------------------------------------------------------------------------------------------------------------------------------------------------------------------------------------------------------------|---------------------------------------------------------------------------------------------------------------------------------------------------------------------------------------------------------------------------------------------------------------------------------------------------|
| GO:0043933 | protein-containing complex subunit organization | 22 | 1770 | 0.46 | 1.20E-04 | 9606. ENSP00000258080, 9606. ENSP00000268058, 9606. ENSP00000296674, 9606. ENSP00000307705, 9606. ENSP00000333657, 9606. ENSP00000355330, 9606. ENSP00000357459, 9606. ENSP00000359300, 9606. ENSP00000374566, 9606. ENSP00000377390, 9606. ENSP00000378563, 9606. ENSP00000379873, 9606. ENSP00000381601, 9606. ENSP00000388001, 9606. ENSP00000398131, 9606. ENSP00000399888, 9606. ENSP00000400591, 9606. ENSP00000404833, 9606. ENSP00000420588, 9606. ENSP00000464087, 9606. ENSP00000478061, 9606. ENSP00000479106                                                                                                                                                                                                                                                                                                                                                                                                                                                      | HTRA2, PML, RPS23, HIST1H1E, MX2, TGM2, ADAR, CETN2, KIF19, PPP6R3, PFDN6, HLA-A, MX1, OAS1, GSPT1, HMGA1, SNRPE, TAPBP, TFAM, RNF213, MARCKS, HIST1H4A                                                                                                                                           |
| GO:0048519 | negative regulation of biological process       | 41 | 4953 | 0.28 | 1.20E-04 | 9606. ENSP00000228928, 9606. ENSP00000233057, 9606. ENSP00000251642, 9606. ENSP00000253110, 9606. ENSP00000257570, 9606. ENSP00000257604, 9606. ENSP00000258080, 9606. ENSP00000261517, 9606. ENSP00000261574, 9606. ENSP00000268058, 9606. ENSP00000269701, 9606. ENSP00000290573, 9606. ENSP00000296674, 9606. ENSP00000307705, 9606. ENSP00000325618, 9606. ENSP00000332666, 9606. ENSP00000339095, 9606. ENSP00000346015, 9606. ENSP00000347495, 9606. ENSP00000354394, 9606. ENSP00000357459, 9606. ENSP00000360869, 9606. ENSP00000360883, 9606. ENSP00000379506, 9606. ENSP00000379873, 9606. ENSP00000381601, 9606. ENSP00000386717, 9606. ENSP00000388001, 9606. ENSP00000392985, 9606. ENSP00000393241, 9606. ENSP00000398131, 9606. ENSP00000399168, 9606. ENSP00000399888, 9606. ENSP00000410769, 9606. ENSP00000416429, 9606. ENSP00000418194, 9606. ENSP00000464087, 9606. ENSP00000464342, 9606. ENSP00000464813, 9606. ENSP00000471242, 9606. ENSP00000479106 | OAS3, EIF2AK2, DHX58, C19orf66, OASL, TRAFD1, HTRA2, VPS13C, IPO5, PML, AKAP8, HK2, RPS23, HIST1H1E, PARP10, UBA7, RPS7, RPL27A, WARS, STAT1, ADAR, IFIT1, IFIT3, RPL14, HLA-A, MX1, RPL31, OAS1, HTATIP2, RPS18, GSPT1, HLA-B, HMGA1, CNBP, RPL32, PARP14, RNF213, RPL36, RPL27, FARP1, HIST1H4A |
| GO:1901360 | organic cyclic compound metabolic process       | 41 | 4963 | 0.28 | 1.20E-04 | 9606. ENSP00000228928, 9606. ENSP00000233057, 9606. ENSP00000249066, 9606. ENSP00000256722, 9606. ENSP00000258080, 9606. ENSP00000260118, 9606. ENSP00000267935, 9606. ENSP00000268058, 9606. ENSP00000269701, 9606. ENSP00000290573, 9606. ENSP00000296674, 9606. ENSP00000300688, 9606. ENSP00000315768, 9606. ENSP00000325618, 9606. ENSP00000339095, 9606. ENSP00000346015, 9606. ENSP00000347495, 9606. ENSP00000354394, 9606. ENSP00000356978, 9606. ENSP00000357459, 9606. ENSP00000359300, 9606. ENSP00000367939, 9606. ENSP00000374399, 9606. ENSP00000377470, 9606. ENSP00000379038, 9606. ENSP00000379506, 9606. ENSP00000386717, 9606. ENSP00000388001, 9606. ENSP00000393241, 9606. ENSP00000398131, 9606. ENSP00000399888, 9606. ENSP00000400591, 9606. ENSP00000410769, 9606. ENSP00000416429, 9606. ENSP00000417901, 9606. ENSP00000418194, 9606. ENSP00000420588, 9606. ENSP00000464342, 9606. ENSP00000464813, 9606. ENSP00000479106                        | OAS3, EIF2AK2, APOL2, CMPK2, HTRA2, GGH, COMMD4, PML, AKAP8, HK2, RAVR1, RPS23, ATP5L, STAT2, PARP10, RPS7, RPL27A, WARS, STAT1, PPOX, ADAR, CETN2, UQCRCQ, TRMT61A, CNP, TYMP, RPL14, RPL31, OAS1, RPS18, GSPT1, HMGA1, SNRPE, CNBP, RPL32, GPHN, PARP14, TFAM, RPL36, RPL27, HIST1H4A           |



|            |                                                                                                 |    |      |      |          |                                                                                                                                                                                                                                                                                                                                                                                                                                                                                                                                                                                                                                                                                                                                                                                     |                                                                                                                                                                                                                     |
|------------|-------------------------------------------------------------------------------------------------|----|------|------|----------|-------------------------------------------------------------------------------------------------------------------------------------------------------------------------------------------------------------------------------------------------------------------------------------------------------------------------------------------------------------------------------------------------------------------------------------------------------------------------------------------------------------------------------------------------------------------------------------------------------------------------------------------------------------------------------------------------------------------------------------------------------------------------------------|---------------------------------------------------------------------------------------------------------------------------------------------------------------------------------------------------------------------|
| GO:0002376 | immune system process                                                                           | 26 | 2370 | 0.4  | 1.30E-04 | 9606.ENSP00000228928,9606.ENSP00000233057,9606.ENSP00000251642,9606.ENSP00000253110,9606.ENSP00000257570,9606.ENSP00000260118,9606.ENSP00000268058,9606.ENSP00000269701,9606.ENSP00000289228,9606.ENSP00000315768,9606.ENSP00000333657,9606.ENSP00000354394,9606.ENSP00000357459,9606.ENSP00000359787,9606.ENSP00000360869,9606.ENSP00000360883,9606.ENSP00000363993,9606.ENSP00000364016,9606.ENSP00000365402,9606.ENSP00000379873,9606.ENSP00000381601,9606.ENSP00000388001,9606.ENSP00000395590,9606.ENSP00000399168,9606.ENSP00000404833,9606.ENSP00000418194                                                                                                                                                                                                                   | OAS3,EIF2AK2,DHX58,C19orf66,OASL,GGH,PML,AKAP8,ACTR1B,STAT2,MX2,STAT1,ADAR,IFI44L,IFIT1,IFIT3,PSMB9,PSMB8,HLA-C,HLA-A,MX1,OAS1,IFI35,HLA-B,TAPBP,PARP14                                                             |
| GO:0065003 | protein-containing complex assembly                                                             | 20 | 1514 | 0.48 | 1.50E-04 | 9606.ENSP00000258080,9606.ENSP00000268058,9606.ENSP00000296674,9606.ENSP00000307705,9606.ENSP00000333657,9606.ENSP00000355330,9606.ENSP00000357459,9606.ENSP00000359300,9606.ENSP00000377390,9606.ENSP00000378563,9606.ENSP00000379873,9606.ENSP00000381601,9606.ENSP00000388001,9606.ENSP00000399888,9606.ENSP00000400591,9606.ENSP00000404833,9606.ENSP00000420588,9606.ENSP00000464087,9606.ENSP00000478061,9606.ENSP00000479106                                                                                                                                                                                                                                                                                                                                                 | HTRA2,PML,RPS23,HIST1H1E,MX2,TGM2,ADAR,CETN2,PPP6R3,PF6D6,HLA-A,MX1,OAS1,HMGA1,SNRPE,TAPBP,TFAM,RNF213,MARCKS,HIST1H4A                                                                                              |
| GO:0002479 | antigen processing and presentation of exogenous peptide antigen via MHC class I, TAP-dependent | 4  | 25   | 1.57 | 1.60E-04 | 9606.ENSP00000365402,9606.ENSP00000379873,9606.ENSP00000399168,9606.ENSP00000404833                                                                                                                                                                                                                                                                                                                                                                                                                                                                                                                                                                                                                                                                                                 | HLA-C,HLA-A,HLA-B,TAPBP                                                                                                                                                                                             |
| GO:0006810 | transport                                                                                       | 36 | 4130 | 0.3  | 2.00E-04 | 9606.ENSP00000249066,9606.ENSP00000260118,9606.ENSP00000261517,9606.ENSP00000261574,9606.ENSP00000262776,9606.ENSP00000268058,9606.ENSP00000269701,9606.ENSP00000289228,9606.ENSP00000290573,9606.ENSP00000296674,9606.ENSP00000300688,9606.ENSP00000303366,9606.ENSP00000316007,9606.ENSP00000333657,9606.ENSP00000339095,9606.ENSP00000346015,9606.ENSP00000355330,9606.ENSP00000357459,9606.ENSP00000360869,9606.ENSP00000365402,9606.ENSP00000377390,9606.ENSP00000377470,9606.ENSP00000379506,9606.ENSP00000379873,9606.ENSP00000386717,9606.ENSP00000392985,9606.ENSP00000393241,9606.ENSP00000399168,9606.ENSP00000399888,9606.ENSP00000400591,9606.ENSP00000404833,9606.ENSP00000405926,9606.ENSP00000416429,9606.ENSP00000428845,9606.ENSP00000464342,9606.ENSP00000464813 | APOL2,GGH,VPS13C,IPO5,LGALS3BP,PML,AKAP8,ACTR1B,HK2,RPS23,ATP5L,LMAN2,SCAMP4,MX2,RPS7,RPL27A,TGM2,ADAR,IFIT1,HLA-C,PPP6R3,CNP,RPL14,HLA-A,RPL31,HTATIP2,RPS18,HLA-B,HMGA1,SNRPE,TAPBP,TMED7,RPL32,VDAC3,RPL36,RPL27 |

|            |                                                                                                   |    |      |      |          |                                                                                                                                                                                                                                                                                                                                                                                                                                                                                                                                                                                                                                                                                                                                                                                                                                                                                                                                 |                                                                                                                                                                                                                                                                           |
|------------|---------------------------------------------------------------------------------------------------|----|------|------|----------|---------------------------------------------------------------------------------------------------------------------------------------------------------------------------------------------------------------------------------------------------------------------------------------------------------------------------------------------------------------------------------------------------------------------------------------------------------------------------------------------------------------------------------------------------------------------------------------------------------------------------------------------------------------------------------------------------------------------------------------------------------------------------------------------------------------------------------------------------------------------------------------------------------------------------------|---------------------------------------------------------------------------------------------------------------------------------------------------------------------------------------------------------------------------------------------------------------------------|
| GO:0006950 | response to stress                                                                                | 31 | 3267 | 0.34 | 2.20E-04 | 9606. ENSP00000228928, 9606. ENSP00000233057, 9606. ENSP00000249066, 9606. ENSP00000251642, 9606. ENSP00000253110, 9606. ENSP00000257570, 9606. ENSP00000258080, 9606. ENSP00000262776, 9606. ENSP00000268058, 9606. ENSP00000269701, 9606. ENSP00000290573, 9606. ENSP00000315768, 9606. ENSP00000332666, 9606. ENSP00000333657, 9606. ENSP00000354394, 9606. ENSP00000357459, 9606. ENSP00000359300, 9606. ENSP00000359787, 9606. ENSP00000360869, 9606. ENSP00000360883, 9606. ENSP00000364016, 9606. ENSP00000365402, 9606. ENSP00000379873, 9606. ENSP00000381601, 9606. ENSP00000388001, 9606. ENSP00000395590, 9606. ENSP00000399168, 9606. ENSP00000399888, 9606. ENSP00000418194, 9606. ENSP00000428845, 9606. ENSP00000479106                                                                                                                                                                                         | OAS3, EIF2AK2, APOL2, DHX58, C19orf66, OASL, HTRA2, LGALS3BP, PML, AKAP8, HK2, STAT2, UBA7, MX2, STAT1, ADAR, CETN2, IFI44L, IFIT1, IFIT3, PSMB8, HLA-C, HLA-A, MX1, OAS1, IFI35, HLAB, HMGA1, PARP14, VDACC3, HIST1H4A                                                   |
| GO:0046483 | heterocycle metabolic process                                                                     | 39 | 4716 | 0.28 | 2.20E-04 | 9606. ENSP00000228928, 9606. ENSP00000233057, 9606. ENSP00000256722, 9606. ENSP00000260118, 9606. ENSP00000267935, 9606. ENSP00000268058, 9606. ENSP00000269701, 9606. ENSP00000290573, 9606. ENSP00000293677, 9606. ENSP00000296674, 9606. ENSP00000300688, 9606. ENSP00000315768, 9606. ENSP00000325618, 9606. ENSP00000339095, 9606. ENSP00000346015, 9606. ENSP00000347495, 9606. ENSP00000354394, 9606. ENSP00000356978, 9606. ENSP00000357459, 9606. ENSP00000359300, 9606. ENSP00000367935, 9606. ENSP00000374399, 9606. ENSP00000377470, 9606. ENSP00000379038, 9606. ENSP00000379506, 9606. ENSP00000386717, 9606. ENSP00000388001, 9606. ENSP00000393241, 9606. ENSP00000398131, 9606. ENSP00000399888, 9606. ENSP00000400591, 9606. ENSP00000410769, 9606. ENSP00000416429, 9606. ENSP00000417901, 9606. ENSP00000418194, 9606. ENSP00000420588, 9606. ENSP00000464342, 9606. ENSP00000464813, 9606. ENSP00000479106 | OAS3, EIF2AK2, CMPK2, GGH, COMMD4, PML, AKAP8, HK2, RAVR1, RPS23, ATP5L, STAT2, PARP10, RPS7, RPL27A, WARS, STAT1, PPOX, ADAR, CETN2, UQCRCQ, TRMT61A, CNP, TYMP, RPL14, RPL31, OAS1, RPS18, GSPT1, HMGA1, SNRPE, CNBP, RPL32, GPHN, PARP14, TFAM, RPL36, RPL27, HIST1H4A |
| GO:0042886 | amide transport                                                                                   | 19 | 1440 | 0.48 | 2.50E-04 | 9606. ENSP00000261574, 9606. ENSP00000268058, 9606. ENSP00000269701, 9606. ENSP00000296674, 9606. ENSP00000303366, 9606. ENSP00000316007, 9606. ENSP00000333657, 9606. ENSP00000339095, 9606. ENSP00000346015, 9606. ENSP00000357459, 9606. ENSP00000360869, 9606. ENSP00000379506, 9606. ENSP00000386717, 9606. ENSP00000393241, 9606. ENSP00000404833, 9606. ENSP00000405926, 9606. ENSP00000416429, 9606. ENSP00000464342, 9606. ENSP00000464813                                                                                                                                                                                                                                                                                                                                                                                                                                                                             | IPO5, PML, AKAP8, RPS23, LMAN2, SCAMP4, MX2, RPS7, RPL27A, ADAR, IFIT1, RPL14, RPL31, RPS18, TAPBP, TMED7, RPL32, RPL36, RPL27                                                                                                                                            |
| GO:0002480 | antigen processing and presentation of exogenous peptide antigen via MHC class I, TAP-independent | 3  | 8    | 1.94 | 2.60E-04 | 9606. ENSP00000365402, 9606. ENSP00000379873, 9606. ENSP00000399168                                                                                                                                                                                                                                                                                                                                                                                                                                                                                                                                                                                                                                                                                                                                                                                                                                                             | HLA-C, HLA-A, HLA-B                                                                                                                                                                                                                                                       |

|            |                                              |    |      |      |          |                                                                                                                                                                                                                                                                                                                                                                                                                                                                                                                                                                                                                                                                                                                                                                                                                                                                                                                                 |                                                                                                                                                                                                                                                                           |
|------------|----------------------------------------------|----|------|------|----------|---------------------------------------------------------------------------------------------------------------------------------------------------------------------------------------------------------------------------------------------------------------------------------------------------------------------------------------------------------------------------------------------------------------------------------------------------------------------------------------------------------------------------------------------------------------------------------------------------------------------------------------------------------------------------------------------------------------------------------------------------------------------------------------------------------------------------------------------------------------------------------------------------------------------------------|---------------------------------------------------------------------------------------------------------------------------------------------------------------------------------------------------------------------------------------------------------------------------|
| GO:0006725 | cellular aromatic compound metabolic process | 39 | 4754 | 0.28 | 2.60E-04 | 9606. ENSP00000228928, 9606. ENSP00000233057, 9606. ENSP00000256722, 9606. ENSP00000260118, 9606. ENSP00000267935, 9606. ENSP00000268058, 9606. ENSP00000269701, 9606. ENSP00000290573, 9606. ENSP00000293677, 9606. ENSP00000296674, 9606. ENSP00000300688, 9606. ENSP00000315768, 9606. ENSP00000325618, 9606. ENSP00000339095, 9606. ENSP00000346015, 9606. ENSP00000347495, 9606. ENSP00000354394, 9606. ENSP00000356978, 9606. ENSP00000357459, 9606. ENSP00000359300, 9606. ENSP00000367939, 9606. ENSP00000374399, 9606. ENSP00000377470, 9606. ENSP00000379038, 9606. ENSP00000379506, 9606. ENSP00000386717, 9606. ENSP00000388001, 9606. ENSP00000393241, 9606. ENSP00000398131, 9606. ENSP00000399888, 9606. ENSP00000400591, 9606. ENSP00000410769, 9606. ENSP00000416429, 9606. ENSP00000417901, 9606. ENSP00000418194, 9606. ENSP00000420588, 9606. ENSP00000464342, 9606. ENSP00000464813, 9606. ENSP00000479106 | OAS3, EIF2AK2, CMPK2, GGH, COMMD4, PML, AKAP8, HK2, RAVR1, RPS23, ATP5L, STAT2, PARP10, RPS7, RPL27A, WARS, STAT1, PPOX, ADAR, CETN2, UQCRCQ, TRMT61A, CNP, TYMP, RPL14, RPL31, OAS1, RPS18, GSPT1, HMGA1, SNRPE, CNBP, RPL32, GPHN, PARP14, TFAM, RPL36, RPL27, HIST1H4A |
| GO:0072657 | protein localization to membrane             | 10 | 405  | 0.75 | 2.60E-04 | 9606. ENSP00000296674, 9606. ENSP00000339095, 9606. ENSP00000346015, 9606. ENSP00000379506, 9606. ENSP00000386717, 9606. ENSP00000393241, 9606. ENSP00000416429, 9606. ENSP00000417901, 9606. ENSP00000464342, 9606. ENSP00000464813                                                                                                                                                                                                                                                                                                                                                                                                                                                                                                                                                                                                                                                                                            | RPS23, RPS7, RPL27A, RPL14, RPL31, RPS18, RPL32, GPHN, RPL36, RPL27                                                                                                                                                                                                       |
| GO:0045184 | establishment of protein localization        | 19 | 1467 | 0.47 | 3.10E-04 | 9606. ENSP00000261574, 9606. ENSP00000268058, 9606. ENSP00000269701, 9606. ENSP00000290573, 9606. ENSP00000296674, 9606. ENSP00000303366, 9606. ENSP00000316007, 9606. ENSP00000333657, 9606. ENSP00000339095, 9606. ENSP00000346015, 9606. ENSP00000357459, 9606. ENSP00000360869, 9606. ENSP00000379506, 9606. ENSP00000386717, 9606. ENSP00000393241, 9606. ENSP00000405926, 9606. ENSP00000416429, 9606. ENSP00000464342, 9606. ENSP00000464813                                                                                                                                                                                                                                                                                                                                                                                                                                                                             | IPO5, PML, AKAP8, HK2, RPS23, LMAN2, SCAMP4, MX2, RPS7, RPL27A, ADAR, IFIT1, RPL14, RPL31, RPS18, TMED7, RPL32, RPL36, RPL27                                                                                                                                              |
| GO:1901575 | organic substance catabolic process          | 20 | 1609 | 0.46 | 3.20E-04 | 9606. ENSP00000258080, 9606. ENSP00000268058, 9606. ENSP00000270586, 9606. ENSP00000290573, 9606. ENSP00000296674, 9606. ENSP00000333266, 9606. ENSP00000339095, 9606. ENSP00000346015, 9606. ENSP00000363993, 9606. ENSP00000364016, 9606. ENSP00000377470, 9606. ENSP00000379038, 9606. ENSP00000379506, 9606. ENSP00000386717, 9606. ENSP00000393241, 9606. ENSP00000398131, 9606. ENSP00000416429, 9606. ENSP00000464087, 9606. ENSP00000464342, 9606. ENSP00000464813                                                                                                                                                                                                                                                                                                                                                                                                                                                      | HTRA2, PML, PSMB6, HK2, RPS23, UBA7, RPS7, RPL27A, PSMB9, PSMB8, CNP, TYMP, RPL14, RPL31, RPS18, GSPT1, RPL32, RNF213, RPL36, RPL27                                                                                                                                       |
| GO:0031348 | negative regulation of defense response      | 7  | 180  | 0.95 | 3.30E-04 | 9606. ENSP00000251642, 9606. ENSP00000257604, 9606. ENSP00000357459, 9606. ENSP00000360869, 9606. ENSP00000379873, 9606. ENSP00000399168, 9606. ENSP00000418194                                                                                                                                                                                                                                                                                                                                                                                                                                                                                                                                                                                                                                                                                                                                                                 | DHX58, TRAFD1, ADAR, IFIT1, HLA-A, HLA-B, PARP14                                                                                                                                                                                                                          |
| GO:0044085 | cellular component biogenesis                | 26 | 2556 | 0.37 | 4.10E-04 | 9606. ENSP00000258080, 9606. ENSP00000268058, 9606. ENSP00000296674, 9606. ENSP00000307705, 9606. ENSP00000333657, 9606. ENSP00000339095, 9606. ENSP00000355330, 9606. ENSP00000357459, 9606. ENSP00000359300, 9606. ENSP00000377390, 9606. ENSP00000378563, 9606. ENSP00000379506, 9606. ENSP00000379873, 9606. ENSP00000381601, 9606. ENSP00000388001, 9606. ENSP00000393241, 9606. ENSP00000399888, 9606. ENSP00000400591, 9606. ENSP00000404833, 9606. ENSP00000420588, 9606. ENSP00000464087, 9606. ENSP00000464813, 9606. ENSP00000471242, 9606. ENSP00000478061, 9606. ENSP00000479106, 9606. ENSP00000484121                                                                                                                                                                                                                                                                                                            | HTRA2, PML, RPS23, HIST1H1E, MX2, RPS7, TGM2, ADAR, CETN2, PP6R3, PFDN6, RPL14, HLA-A, MX1, OAS1, RPS18, HMGA1, SNRPE, TAPBP, TFAM, RNF213, RPL27, FARP1, MARCKS, HIST1H4A, ARFIP2                                                                                        |

|            |                                                  |    |      |      |          |                                                                                                                                                                                                                                                                                                                                                                                                                                                                                                                                                                                                                                                                                                                                                                                                                                                                                   |                                                                                                                                                                                                                                                                 |
|------------|--------------------------------------------------|----|------|------|----------|-----------------------------------------------------------------------------------------------------------------------------------------------------------------------------------------------------------------------------------------------------------------------------------------------------------------------------------------------------------------------------------------------------------------------------------------------------------------------------------------------------------------------------------------------------------------------------------------------------------------------------------------------------------------------------------------------------------------------------------------------------------------------------------------------------------------------------------------------------------------------------------|-----------------------------------------------------------------------------------------------------------------------------------------------------------------------------------------------------------------------------------------------------------------|
| GO:0044248 | cellular catabolic process                       | 20 | 1646 | 0.45 | 4.20E-04 | 9606. ENSP00000258080, 9606. ENSP00000268058, 9606. ENSP00000270586, 9606. ENSP00000290573, 9606. ENSP00000296674, 9606. ENSP00000333266, 9606. ENSP00000339095, 9606. ENSP00000346015, 9606. ENSP00000363993, 9606. ENSP00000364016, 9606. ENSP00000377470, 9606. ENSP00000379038, 9606. ENSP00000379506, 9606. ENSP00000386717, 9606. ENSP00000393241, 9606. ENSP00000398131, 9606. ENSP00000416429, 9606. ENSP00000464087, 9606. ENSP00000464342, 9606. ENSP00000464813                                                                                                                                                                                                                                                                                                                                                                                                        | HTRA2, PML, PSMB6, HK2, RPS23, UBA7, RPS7, RPL27A, PSMB9, PSMB8, CNP, TYMP, RPL14, RPL31, RPS18, GSPT1, RPL32, RNF213, RPL36, RPL27                                                                                                                             |
| GO:0010629 | negative regulation of gene expression           | 20 | 1670 | 0.44 | 5.10E-04 | 9606. ENSP00000233057, 9606. ENSP00000268058, 9606. ENSP00000296674, 9606. ENSP00000307705, 9606. ENSP00000325618, 9606. ENSP00000339095, 9606. ENSP00000346015, 9606. ENSP00000354394, 9606. ENSP00000357459, 9606. ENSP00000379506, 9606. ENSP00000386717, 9606. ENSP00000393241, 9606. ENSP00000398131, 9606. ENSP00000399888, 9606. ENSP00000410769, 9606. ENSP00000416429, 9606. ENSP00000418194, 9606. ENSP00000464342, 9606. ENSP00000464813, 9606. ENSP00000479106                                                                                                                                                                                                                                                                                                                                                                                                        | EIF2AK2, PML, RPS23, HIST1H1E, PARP10, RPS7, RPL27A, STAT1, ADAR, RPL14, RPL31, RPS18, GSPT1, HMGA1, CNBP, RPL32, PARP14, RPL36, RPL27, HIST1H4A                                                                                                                |
| GO:0015031 | protein transport                                | 18 | 1391 | 0.47 | 5.10E-04 | 9606. ENSP00000261574, 9606. ENSP00000268058, 9606. ENSP00000269701, 9606. ENSP00000296674, 9606. ENSP00000303366, 9606. ENSP00000316007, 9606. ENSP00000333657, 9606. ENSP00000339095, 9606. ENSP00000346015, 9606. ENSP00000357459, 9606. ENSP00000360869, 9606. ENSP00000379506, 9606. ENSP00000386717, 9606. ENSP00000393241, 9606. ENSP00000405926, 9606. ENSP00000416429, 9606. ENSP00000464342, 9606. ENSP00000464813                                                                                                                                                                                                                                                                                                                                                                                                                                                      | IPOS, PML, AKAP8, RPS23, LMAN2, SCAMP4, MX2, RPS7, RPL27A, ADAR, IFIT1, RPL14, RPL31, RPS18, TMED7, RPL32, RPL36, RPL27                                                                                                                                         |
| GO:0006139 | nucleobase-containing compound metabolic process | 37 | 4551 | 0.27 | 5.70E-04 | 9606. ENSP00000228928, 9606. ENSP00000233057, 9606. ENSP00000256722, 9606. ENSP00000267935, 9606. ENSP00000268058, 9606. ENSP00000269701, 9606. ENSP00000290573, 9606. ENSP00000293677, 9606. ENSP00000296674, 9606. ENSP00000300688, 9606. ENSP00000315768, 9606. ENSP00000325618, 9606. ENSP00000339095, 9606. ENSP00000346015, 9606. ENSP00000347495, 9606. ENSP00000354394, 9606. ENSP00000357459, 9606. ENSP00000359300, 9606. ENSP00000367939, 9606. ENSP00000374399, 9606. ENSP00000377470, 9606. ENSP00000379038, 9606. ENSP00000379506, 9606. ENSP00000386717, 9606. ENSP00000388001, 9606. ENSP00000393241, 9606. ENSP00000398131, 9606. ENSP00000399888, 9606. ENSP00000400591, 9606. ENSP00000410769, 9606. ENSP00000416429, 9606. ENSP00000417901, 9606. ENSP00000418194, 9606. ENSP00000420588, 9606. ENSP00000464342, 9606. ENSP00000464813, 9606. ENSP00000479106 | OAS3, EIF2AK2, CMPK2, COMMD4, PML, AKAP8, HK2, RAVR1, RPS23, ATP5L, STAT2, PARP10, RPS7, RPL27A, WARS, STAT1, ADAR, CETIN2, UQCRCQ, TRMT61A, CNP, TYMP, RPL14, RPL31, OAS1, RPS18, GSPT1, HMGA1, SNRPE, CNBP, RPL32, GPHN, PARP14, TFAM, RPL36, RPL27, HIST1H4A |
| GO:0071705 | nitrogen compound transport                      | 20 | 1690 | 0.44 | 5.80E-04 | 9606. ENSP00000261574, 9606. ENSP00000268058, 9606. ENSP00000269701, 9606. ENSP00000296674, 9606. ENSP00000303366, 9606. ENSP00000316007, 9606. ENSP00000333657, 9606. ENSP00000339095, 9606. ENSP00000346015, 9606. ENSP00000357459, 9606. ENSP00000360869, 9606. ENSP00000379506, 9606. ENSP00000386717, 9606. ENSP00000393241, 9606. ENSP00000404833, 9606. ENSP00000405926, 9606. ENSP00000416429, 9606. ENSP00000428845, 9606. ENSP00000464342, 9606. ENSP00000464813                                                                                                                                                                                                                                                                                                                                                                                                        | IPOS, PML, AKAP8, RPS23, LMAN2, SCAMP4, MX2, RPS7, RPL27A, ADAR, IFIT1, RPL14, RPL31, RPS18, TAPBP, TMED7, RPL32, VDACC3, RPL36, RPL27                                                                                                                          |

|            |                                                 |    |      |      |          |                                                                                                                                                                                                                                                                                                                                                                                                                                                                                                                                                                                                                                                                                                           |                                                                                                                                                                                                                     |
|------------|-------------------------------------------------|----|------|------|----------|-----------------------------------------------------------------------------------------------------------------------------------------------------------------------------------------------------------------------------------------------------------------------------------------------------------------------------------------------------------------------------------------------------------------------------------------------------------------------------------------------------------------------------------------------------------------------------------------------------------------------------------------------------------------------------------------------------------|---------------------------------------------------------------------------------------------------------------------------------------------------------------------------------------------------------------------|
| GO:0010033 | response to organic substance                   | 27 | 2815 | 0.34 | 7.10E-04 | 9606. ENSP00000228928,9606. ENSP00000233057,9606. ENSP00000253110,9606. ENSP00000256722,9606. ENSP00000257570,9606. ENSP00000257604,9606. ENSP00000258080,9606. ENSP00000260118,9606. ENSP00000261574,9606. ENSP00000268058,9606. ENSP00000269701,9606. ENSP00000290573,9606. ENSP00000315768,9606. ENSP00000333657,9606. ENSP00000354394,9606. ENSP00000357459,9606. ENSP00000360869,9606. ENSP00000360883,9606. ENSP00000364016,9606. ENSP00000365402,9606. ENSP00000377470,9606. ENSP00000379873,9606. ENSP00000381601,9606. ENSP00000388001,9606. ENSP00000395590,9606. ENSP00000399168,9606. ENSP00000464813                                                                                         | OAS3, EIF2AK2, C19orf66, CMPK2, OASL, TRAFD1, HTRA2, GGH, IPO5, PML, AKAP8, HK2, STAT2, MX2, STAT1, ADAR, IFIT1, IFIT3, PSMB8, HLA-C, CNP, HLA-A, MX1, OAS1, IFI35, HLA-B, RPL27                                    |
| GO:0051641 | cellular localization                           | 23 | 2180 | 0.39 | 7.50E-04 | 9606. ENSP00000261517,9606. ENSP00000261574,9606. ENSP00000268058,9606. ENSP00000290573,9606. ENSP00000296674,9606. ENSP00000300688,9606. ENSP00000339095,9606. ENSP00000346015,9606. ENSP00000357459,9606. ENSP00000359300,9606. ENSP00000360869,9606. ENSP00000377390,9606. ENSP00000379506,9606. ENSP00000386717,9606. ENSP00000392985,9606. ENSP00000393241,9606. ENSP00000399888,9606. ENSP00000400591,9606. ENSP00000405926,9606. ENSP00000416429,9606. ENSP00000417901,9606. ENSP00000464342,9606. ENSP00000464813                                                                                                                                                                                 | VPS13C, IPO5, PML, HK2, RPS23, ATP5L, RPS7, RPL27A, ADAR, CETN2, IFIT1, PPP6R3, RPL14, RPL31, HTATIP2, RPS18, HMGA1, SNRPE, TMED7, RPL32, GPHN, RPL36, RPL27                                                        |
| GO:0044271 | cellular nitrogen compound biosynthetic process | 31 | 3528 | 0.31 | 8.10E-04 | 9606. ENSP00000233057,9606. ENSP00000256722,9606. ENSP00000267935,9606. ENSP00000268058,9606. ENSP00000269701,9606. ENSP00000290573,9606. ENSP00000296674,9606. ENSP00000300688,9606. ENSP00000315768,9606. ENSP00000325618,9606. ENSP00000339095,9606. ENSP00000346015,9606. ENSP00000347495,9606. ENSP00000354394,9606. ENSP00000356978,9606. ENSP00000377470,9606. ENSP00000379038,9606. ENSP00000379506,9606. ENSP00000386717,9606. ENSP00000388001,9606. ENSP00000393241,9606. ENSP00000398131,9606. ENSP00000399888,9606. ENSP00000400591,9606. ENSP00000410769,9606. ENSP00000416429,9606. ENSP00000418194,9606. ENSP00000420588,9606. ENSP00000464342,9606. ENSP00000464813,9606. ENSP00000479106 | EIF2AK2, CMPK2, COMMD4, PML, AKAP8, HK2, RPS23, ATP5L, STAT2, PARP10, RPS7, RPL27A, WARS, STAT1, PPOX, CNP, TYMP, RPL14, RPL31, OAS1, RPS18, GSPT1, HMGA1, SNRPE, CNBP, RPL32, PARP14, TFAM, RPL36, RPL27, HIST1H4A |
| GO:0006886 | intracellular protein transport                 | 13 | 836  | 0.55 | 1.20E-03 | 9606. ENSP00000261574,9606. ENSP00000268058,9606. ENSP00000296674,9606. ENSP00000339095,9606. ENSP00000346015,9606. ENSP00000357459,9606. ENSP00000360869,9606. ENSP00000379506,9606. ENSP00000386717,9606. ENSP00000393241,9606. ENSP00000416429,9606. ENSP00000464342,9606. ENSP00000464813                                                                                                                                                                                                                                                                                                                                                                                                             | IPO5, PML, RPS23, RPS7, RPL27A, ADAR, IFIT1, RPL14, RPL31, RPS18, RPL32, RPL36, RPL27                                                                                                                               |
| GO:0019882 | antigen processing and presentation             | 6  | 158  | 0.94 | 1.30E-03 | 9606. ENSP00000289228,9606. ENSP00000364016,9606. ENSP00000365402,9606. ENSP00000379873,9606. ENSP00000399168,9606. ENSP00000404833                                                                                                                                                                                                                                                                                                                                                                                                                                                                                                                                                                       | ACTR1B, PSMB8, HLA-C, HLA-A, HLA-B, TAPBP                                                                                                                                                                           |

|            |                                           |    |      |      |          |                                                                                                                                                                                                                                                                                                                                                                                                                                                                                                                                                                                                                                                                                                                                                                                                                                                                                                                                 |                                                                                                                                                                                                                                                                              |
|------------|-------------------------------------------|----|------|------|----------|---------------------------------------------------------------------------------------------------------------------------------------------------------------------------------------------------------------------------------------------------------------------------------------------------------------------------------------------------------------------------------------------------------------------------------------------------------------------------------------------------------------------------------------------------------------------------------------------------------------------------------------------------------------------------------------------------------------------------------------------------------------------------------------------------------------------------------------------------------------------------------------------------------------------------------|------------------------------------------------------------------------------------------------------------------------------------------------------------------------------------------------------------------------------------------------------------------------------|
| GO:0008104 | protein localization                      | 21 | 1966 | 0.39 | 1.40E-03 | 9606. ENSP00000261574, 9606. ENSP00000268058, 9606. ENSP00000269701, 9606. ENSP00000290573, 9606. ENSP00000296674, 9606. ENSP00000303366, 9606. ENSP00000316007, 9606. ENSP0000033657, 9606. ENSP00000339095, 9606. ENSP00000346015, 9606. ENSP00000357459, 9606. ENSP00000360869, 9606. ENSP00000363624, 9606. ENSP00000379506, 9606. ENSP00000386717, 9606. ENSP00000393241, 9606. ENSP00000405926, 9606. ENSP00000416429, 9606. ENSP00000417901, 9606. ENSP00000464342, 9606. ENSP00000464813                                                                                                                                                                                                                                                                                                                                                                                                                                | IPO5, PML, AKAP8, HK2, RPS23, LMAN2, SCAMP4, MX2, RPS7, RPL27A, ADAR, IFIT1, CUTA, RPL14, RPL31, RPS18, TMED7, RPL32, GPHN, RPL36, RPL27                                                                                                                                     |
| GO:0002831 | regulation of response to biotic stimulus | 9  | 426  | 0.69 | 1.80E-03 | 9606. ENSP00000251642, 9606. ENSP00000257604, 9606. ENSP00000268058, 9606. ENSP00000354394, 9606. ENSP00000357459, 9606. ENSP00000360869, 9606. ENSP00000379873, 9606. ENSP00000399168, 9606. ENSP00000418194                                                                                                                                                                                                                                                                                                                                                                                                                                                                                                                                                                                                                                                                                                                   | DHX58, TRAFD1, PML, STAT1, ADAR, IFIT1, HLA-A, HLA-B, PARP14                                                                                                                                                                                                                 |
| GO:0007005 | mitochondrion organization                | 9  | 424  | 0.69 | 1.80E-03 | 9606. ENSP00000258080, 9606. ENSP00000261517, 9606. ENSP00000290573, 9606. ENSP00000300688, 9606. ENSP00000333657, 9606. ENSP00000377470, 9606. ENSP00000379038, 9606. ENSP00000381601, 9606. ENSP00000420588                                                                                                                                                                                                                                                                                                                                                                                                                                                                                                                                                                                                                                                                                                                   | HTRA2, VPS13C, HK2, ATP5L, MX2, CNP, TYMP, MX1, TFAM                                                                                                                                                                                                                         |
| GO:0051179 | localization                              | 39 | 5233 | 0.23 | 2.00E-03 | 9606. ENSP00000249066, 9606. ENSP00000260118, 9606. ENSP00000261517, 9606. ENSP00000261574, 9606. ENSP00000262776, 9606. ENSP00000268058, 9606. ENSP00000269701, 9606. ENSP00000289228, 9606. ENSP00000290573, 9606. ENSP00000296674, 9606. ENSP00000300688, 9606. ENSP00000303366, 9606. ENSP00000316007, 9606. ENSP00000333657, 9606. ENSP00000339095, 9606. ENSP00000346015, 9606. ENSP00000355330, 9606. ENSP00000357459, 9606. ENSP00000359300, 9606. ENSP00000360869, 9606. ENSP00000363624, 9606. ENSP00000365402, 9606. ENSP00000377390, 9606. ENSP00000377470, 9606. ENSP00000379506, 9606. ENSP00000379873, 9606. ENSP00000386717, 9606. ENSP00000392985, 9606. ENSP00000393241, 9606. ENSP00000399168, 9606. ENSP00000399888, 9606. ENSP00000400591, 9606. ENSP00000404833, 9606. ENSP00000405926, 9606. ENSP00000416429, 9606. ENSP00000417901, 9606. ENSP00000428845, 9606. ENSP00000464342, 9606. ENSP00000464813 | APOL2, GGH, VPS13C, IPO5, LGALS3BP, PML, AKAP8, ACTR1B, HK2, RPS23, ATP5L, LMAN2, SCAMP4, MX2, RPS7, RPL27A, TGM2, ADAR, CETN2, IFIT1, CUTA, HLA-C, PPP6R3, CNP, RPL14, HLA-A, RPL31, HTATIP2, RPS18, HLA-B, HMGA1, SNRPE, TAPBP, TMED7, RPL32, GPHN, VDAC3, RPL36, RPL27    |
| GO:1901564 | organonitrogen compound metabolic process | 39 | 5281 | 0.23 | 2.50E-03 | 9606. ENSP00000225719, 9606. ENSP00000226299, 9606. ENSP00000233057, 9606. ENSP00000249066, 9606. ENSP00000256722, 9606. ENSP00000258080, 9606. ENSP00000260118, 9606. ENSP00000268058, 9606. ENSP00000270586, 9606. ENSP00000290573, 9606. ENSP00000296674, 9606. ENSP00000300688, 9606. ENSP00000307705, 9606. ENSP00000325618, 9606. ENSP00000333266, 9606. ENSP00000339095, 9606. ENSP00000346015, 9606. ENSP00000347495, 9606. ENSP00000355330, 9606. ENSP00000356978, 9606. ENSP00000363993, 9606. ENSP00000364016, 9606. ENSP00000367939, 9606. ENSP00000379038, 9606. ENSP00000379506, 9606. ENSP00000379873, 9606. ENSP00000386717, 9606. ENSP00000388001, 9606. ENSP00000393241, 9606. ENSP00000398131, 9606. ENSP00000404833, 9606. ENSP00000416429, 9606. ENSP00000417901, 9606. ENSP00000418194, 9606. ENSP00000464036, 9606. ENSP00000464087, 9606. ENSP00000464342, 9606. ENSP00000464813, 9606. ENSP00000479106 | CPD, LAP3, EIF2AK2, APOL2, CMPK2, HTRA2, GGH, PML, PSMB6, HK2, RPS23, ATP5L, HIST1H1E, PARP10, UBA7, RPS7, RPL27A, WARS, TGM2, PPOX, PSMB9, PSMB8, UQCRCQ, TYMP, RPL14, HLA-A, RPL31, OAS1, RPS18, GSPT1, TAPBP, RPL32, GPHN, PARP14, CDK11B, RNF213, RPL36, RPL27, HIST1H4A |

|            |                                          |    |      |      |          |                                                                                                                                                                                                                                                                                                                                                                                                                                                                                                                                                                                                                                                                                                                                                                                                                                                                                                                                                                                                                                                                                                                                                                                                               |                                                                                                                                                                                                                                                                                                                                                                              |
|------------|------------------------------------------|----|------|------|----------|---------------------------------------------------------------------------------------------------------------------------------------------------------------------------------------------------------------------------------------------------------------------------------------------------------------------------------------------------------------------------------------------------------------------------------------------------------------------------------------------------------------------------------------------------------------------------------------------------------------------------------------------------------------------------------------------------------------------------------------------------------------------------------------------------------------------------------------------------------------------------------------------------------------------------------------------------------------------------------------------------------------------------------------------------------------------------------------------------------------------------------------------------------------------------------------------------------------|------------------------------------------------------------------------------------------------------------------------------------------------------------------------------------------------------------------------------------------------------------------------------------------------------------------------------------------------------------------------------|
| GO:0071310 | cellular response to organic substance   | 22 | 2219 | 0.36 | 2.60E-03 | 9606. ENSP00000228928,9606. ENSP00000233057,9606. ENSP00000256722,9606. ENSP00000257570,9606. ENSP00000258080,9606. ENSP00000261574,9606. ENSP00000268058,9606. ENSP00000269701,9606. ENSP00000290573,9606. ENSP00000315768,9606. ENSP00000333657,9606. ENSP00000354394,9606. ENSP00000357459,9606. ENSP00000360869,9606. ENSP00000360883,9606. ENSP00000364016,9606. ENSP00000365402,9606. ENSP00000379873,9606. ENSP00000381601,9606. ENSP00000388001,9606. ENSP00000395590,9606. ENSP00000399168                                                                                                                                                                                                                                                                                                                                                                                                                                                                                                                                                                                                                                                                                                           | OAS3, EIF2AK2, CMPK2, OAS1, HTRA2, IPO5, PML, AKAP8, HK2, STAT2, MX2, STAT1, ADAR, IFIT1, IFIT3, PSMB8, HLA-C, HLA-A, MX1, OAS1, IFI35, HLA-B                                                                                                                                                                                                                                |
| GO:0006807 | nitrogen compound metabolic process      | 53 | 8349 | 0.16 | 3.30E-03 | 9606. ENSP00000225719,9606. ENSP00000226299,9606. ENSP00000228928,9606. ENSP00000233057,9606. ENSP00000249066,9606. ENSP00000256722,9606. ENSP00000258080,9606. ENSP00000260118,9606. ENSP00000267935,9606. ENSP00000268058,9606. ENSP00000269701,9606. ENSP00000270586,9606. ENSP00000290573,9606. ENSP00000293677,9606. ENSP00000296674,9606. ENSP00000300688,9606. ENSP00000307705,9606. ENSP00000315768,9606. ENSP00000325618,9606. ENSP00000333266,9606. ENSP00000339095,9606. ENSP00000346015,9606. ENSP00000347495,9606. ENSP00000354394,9606. ENSP00000355330,9606. ENSP00000356978,9606. ENSP00000357459,9606. ENSP00000359300,9606. ENSP00000363993,9606. ENSP00000364016,9606. ENSP00000367939,9606. ENSP00000374399,9606. ENSP00000377470,9606. ENSP00000379038,9606. ENSP00000379506,9606. ENSP00000379873,9606. ENSP00000386717,9606. ENSP00000388001,9606. ENSP00000393241,9606. ENSP00000398131,9606. ENSP00000399888,9606. ENSP00000400591,9606. ENSP00000404833,9606. ENSP00000410769,9606. ENSP00000416429,9606. ENSP00000417901,9606. ENSP00000418194,9606. ENSP00000420588,9606. ENSP00000464036,9606. ENSP00000464087,9606. ENSP00000464342,9606. ENSP00000464813,9606. ENSP00000479106 | CPD, LAP3, OAS3, EIF2AK2, APOL2, CMPK2, HTRA2, GGH, COMMD4, PML, AKAP8, PSMB6, HK2, RAVER1, RPS23, ATP5L, HIST1H1E, STAT2, PARP10, UBA7, RPS7, RPL27A, WARS, STAT1, TGM2, PPOX, ADAR, CETN2, PSMB9, PSMB8, UQCRCQ, TRMT61A, CNP, TYMP, RPL14, HLA-A, RPL31, OAS1, RPS18, GSPT1, HMGA1, SNRPE, TAPBP, CNBP, RPL32, GPHN, PARP14, TFAM, CDK11B, RNF213, RPL36, RPL27, HIST1H4A |
| GO:0009892 | negative regulation of metabolic process | 25 | 2762 | 0.32 | 3.40E-03 | 9606. ENSP00000233057,9606. ENSP00000258080,9606. ENSP00000261574,9606. ENSP00000268058,9606. ENSP00000290573,9606. ENSP00000296674,9606. ENSP00000307705,9606. ENSP00000325618,9606. ENSP00000339095,9606. ENSP00000346015,9606. ENSP00000347495,9606. ENSP00000354394,9606. ENSP00000357459,9606. ENSP00000379506,9606. ENSP00000386717,9606. ENSP00000393241,9606. ENSP00000398131,9606. ENSP00000399888,9606. ENSP00000410769,9606. ENSP00000416429,9606. ENSP00000418194,9606. ENSP00000464342,9606. ENSP00000464813,9606. ENSP00000471242,9606. ENSP00000479106                                                                                                                                                                                                                                                                                                                                                                                                                                                                                                                                                                                                                                         | EIF2AK2, HTRA2, IPO5, PML, HK2, RPS23, HIST1H1E, PARP10, RPS7, RPL27A, WARS, STAT1, ADAR, RPL14, RPL31, RPS18, GSPT1, HMGA1, CNBP, RPL32, PARP14, RPL36, RPL27, FARP1, HIST1H4A                                                                                                                                                                                              |
| GO:0033036 | macromolecule localization               | 22 | 2268 | 0.35 | 3.50E-03 | 9606. ENSP00000249066,9606. ENSP00000261574,9606. ENSP00000268058,9606. ENSP00000269701,9606. ENSP00000290573,9606. ENSP00000296674,9606. ENSP00000303366,9606. ENSP00000316007,9606. ENSP00000333657,9606. ENSP00000339095,9606. ENSP00000346015,9606. ENSP00000357459,9606. ENSP00000360869,9606. ENSP00000363624,9606. ENSP00000379506,9606. ENSP00000386717,9606. ENSP00000393241,9606. ENSP00000405926,9606. ENSP00000416429,9606. ENSP00000417901,9606. ENSP00000464342,9606. ENSP00000464813                                                                                                                                                                                                                                                                                                                                                                                                                                                                                                                                                                                                                                                                                                           | APOL2, IPO5, PML, AKAP8, HK2, RPS23, LMAN2, SCAMP4, MX2, RPS7, RPL27A, ADAR, IFIT1, CUTA, RPL14, RPL31, RPS18, TMED7, RPL32, GPHN, RPL36, RPL27                                                                                                                                                                                                                              |

|            |                                                                         |    |      |      |          |                                                                                                                                                                                                                                                                                                                                                                                                                                                                               |                                                                                                                                    |
|------------|-------------------------------------------------------------------------|----|------|------|----------|-------------------------------------------------------------------------------------------------------------------------------------------------------------------------------------------------------------------------------------------------------------------------------------------------------------------------------------------------------------------------------------------------------------------------------------------------------------------------------|------------------------------------------------------------------------------------------------------------------------------------|
| GO:0051170 | import into nucleus                                                     | 5  | 122  | 0.97 | 3.50E-03 | 9606.ENSP00000261574,9606.ENSP00000268058,9606.ENSP00000357459,9606.ENSP00000392985,9606.ENSP00000400591                                                                                                                                                                                                                                                                                                                                                                      | IPO5,PML,ADAR,HTATIP2,SNRPE                                                                                                        |
| GO:0002478 | antigen processing and presentation of exogenous peptide antigen        | 5  | 123  | 0.97 | 3.60E-03 | 9606.ENSP00000289228,9606.ENSP00000365402,9606.ENSP00000379873,9606.ENSP00000399168,9606.ENSP00000404833                                                                                                                                                                                                                                                                                                                                                                      | ACTR1B,HLA-C,HLA-A,HLA-B,TAPBP                                                                                                     |
| GO:0050688 | regulation of defense response to virus                                 | 4  | 71   | 1.11 | 4.80E-03 | 9606.ENSP00000251642,9606.ENSP00000268058,9606.ENSP00000354394,9606.ENSP00000360869                                                                                                                                                                                                                                                                                                                                                                                           | DHX58,PML,STAT1,IFIT1                                                                                                              |
| GO:0022607 | cellular component assembly                                             | 22 | 2343 | 0.33 | 5.20E-03 | 9606.ENSP00000258080,9606.ENSP00000268058,9606.ENSP00000292905,9606.ENSP00000307705,9606.ENSP00000333657,9606.ENSP00000355330,9606.ENSP00000357459,9606.ENSP00000359300,9606.ENSP00000377390,9606.ENSP00000378563,9606.ENSP00000379873,9606.ENSP00000381601,9606.ENSP00000388001,9606.ENSP00000399888,9606.ENSP00000400591,9606.ENSP00000404833,9606.ENSP00000420588,9606.ENSP00000464087,9606.ENSP00000471242,9606.ENSP00000478061,9606.ENSP00000479106,9606.ENSP00000484121 | HTRA2,PML,RPS23,HIST1H1E,MX2,TGM2,ADAR,CETN2,PPP6R3,PFND6,HLA-A,MX1,OAS1,HMGA1,SNRPE,TAPBP,TFAM,RNF213,FARP1,MARKS,HIST1H4A,ARFIP2 |
| GO:0042270 | protection from natural killer cell mediated cytotoxicity               | 2  | 5    | 1.96 | 5.70E-03 | 9606.ENSP00000379873,9606.ENSP00000399168                                                                                                                                                                                                                                                                                                                                                                                                                                     | HLA-A,HLA-B                                                                                                                        |
| GO:0070212 | protein poly-ADP-ribosylation                                           | 2  | 5    | 1.96 | 5.70E-03 | 9606.ENSP00000325618,9606.ENSP00000418194                                                                                                                                                                                                                                                                                                                                                                                                                                     | PARP10,PARP14                                                                                                                      |
| GO:0071702 | organic substance transport                                             | 20 | 2040 | 0.35 | 5.90E-03 | 9606.ENSP00000249066,9606.ENSP00000261574,9606.ENSP00000268058,9606.ENSP00000269701,9606.ENSP00000296674,9606.ENSP00000303366,9606.ENSP00000316007,9606.ENSP00000333657,9606.ENSP00000339095,9606.ENSP00000346015,9606.ENSP00000357459,9606.ENSP00000360869,9606.ENSP00000379506,9606.ENSP00000386717,9606.ENSP00000393241,9606.ENSP00000405926,9606.ENSP00000416429,9606.ENSP00000428845,9606.ENSP00000464342,9606.ENSP00000464813                                           | APOL2,IPO5,PML,AKAP8,RPS23,LMAN2,SCAMP4,MX2,RPS7,RPL27A,ADAR,IFIT1,RPL14,RPL31,RPS18,TMED7,RPL32,VDAC3,RPL36,RPL27                 |
| GO:0032102 | negative regulation of response to external stimulus                    | 7  | 310  | 0.72 | 6.50E-03 | 9606.ENSP00000251642,9606.ENSP00000257604,9606.ENSP00000357459,9606.ENSP00000360869,9606.ENSP00000379873,9606.ENSP00000399168,9606.ENSP00000418194                                                                                                                                                                                                                                                                                                                            | DHX58,TRAFD1,ADAR,IFIT1,HLA-A,HLA-B,PARP14                                                                                         |
| GO:0002683 | negative regulation of immune system process                            | 8  | 425  | 0.64 | 8.20E-03 | 9606.ENSP00000251642,9606.ENSP00000257604,9606.ENSP00000357459,9606.ENSP00000360869,9606.ENSP00000379873,9606.ENSP00000399168,9606.ENSP00000418194,9606.ENSP00000479106                                                                                                                                                                                                                                                                                                       | DHX58,TRAFD1,ADAR,IFIT1,HLA-A,HLA-B,PARP14,HIST1H4A                                                                                |
| GO:1903146 | regulation of autophagy of mitochondrion                                | 3  | 35   | 1.3  | 8.40E-03 | 9606.ENSP00000258080,9606.ENSP00000261517,9606.ENSP00000290573                                                                                                                                                                                                                                                                                                                                                                                                                | HTRA2,VPS13C,HK2                                                                                                                   |
| GO:0003374 | dynamin family protein polymerization involved in mitochondrial fission | 2  | 7    | 1.82 | 9.20E-03 | 9606.ENSP00000333657,9606.ENSP00000381601                                                                                                                                                                                                                                                                                                                                                                                                                                     | MX2,MX1                                                                                                                            |
| GO:0060700 | regulation of ribonuclease activity                                     | 2  | 7    | 1.82 | 9.20E-03 | 9606.ENSP00000228928,9606.ENSP00000388001                                                                                                                                                                                                                                                                                                                                                                                                                                     | OAS3,OAS1                                                                                                                          |
| GO:0031347 | regulation of defense response                                          | 10 | 676  | 0.53 | 1.03E-02 | 9606.ENSP00000251642,9606.ENSP00000257604,9606.ENSP00000268058,9606.ENSP00000354394,9606.ENSP00000355330,9606.ENSP00000357459,9606.ENSP00000360869,9606.ENSP00000379873,9606.ENSP00000399168,9606.ENSP00000418194                                                                                                                                                                                                                                                             | DHX58,TRAFD1,PML,STAT1,TGM2,ADAR,IFIT1,HLA-A,HLA-B,PARP14                                                                          |
| GO:0034613 | cellular protein localization                                           | 15 | 1367 | 0.4  | 1.09E-02 | 9606.ENSP00000261574,9606.ENSP00000268058,9606.ENSP00000290573,9606.ENSP00000296674,9606.ENSP00000339095,9606.ENSP00000346015,9606.ENSP00000357459,9606.ENSP00000360869,9606.ENSP00000379506,9606.ENSP00000386717,9606.ENSP00000393241,9606.ENSP00000416429,9606.ENSP00000417901,9606.ENSP00000464342,9606.ENSP00000464813                                                                                                                                                    | IPO5,PML,HK2,RPS23,RPS7,RPL27A,ADAR,IFIT1,RPL14,RPL31,RPS18,RPL32,GPHN,RPL36,RPL27                                                 |



|            |                                                          |    |      |      |          |                                                                                                                                                                                                                                                                                                                                                                                                                                                                                                                                                                                                                                                                                                           |                                                                                                                                                                                                                          |
|------------|----------------------------------------------------------|----|------|------|----------|-----------------------------------------------------------------------------------------------------------------------------------------------------------------------------------------------------------------------------------------------------------------------------------------------------------------------------------------------------------------------------------------------------------------------------------------------------------------------------------------------------------------------------------------------------------------------------------------------------------------------------------------------------------------------------------------------------------|--------------------------------------------------------------------------------------------------------------------------------------------------------------------------------------------------------------------------|
| GO:0050691 | regulation of defense response to virus by host          | 3  | 39   | 1.25 | 1.09E-02 | 9606. ENSP00000268058,9606. ENSP00000354394,9606. ENSP00000360869                                                                                                                                                                                                                                                                                                                                                                                                                                                                                                                                                                                                                                         | PML,STAT1,IFIT1                                                                                                                                                                                                          |
| GO:0046719 | regulation by virus of viral protein levels in host cell | 2  | 8    | 1.76 | 1.10E-02 | 9606. ENSP00000354394,9606. ENSP00000360869                                                                                                                                                                                                                                                                                                                                                                                                                                                                                                                                                                                                                                                               | STAT1,IFIT1                                                                                                                                                                                                              |
| GO:0042221 | response to chemical                                     | 31 | 4153 | 0.24 | 1.25E-02 | 9606. ENSP00000228928,9606. ENSP00000233057,9606. ENSP00000253110,9606. ENSP00000256722,9606. ENSP00000257570,9606. ENSP00000257604,9606. ENSP00000258080,9606. ENSP00000260118,9606. ENSP00000261574,9606. ENSP00000268058,9606. ENSP00000269701,9606. ENSP00000290573,9606. ENSP00000315768,9606. ENSP00000333657,9606. ENSP00000354394,9606. ENSP00000356978,9606. ENSP00000357459,9606. ENSP00000360869,9606. ENSP00000360883,9606. ENSP00000363624,9606. ENSP00000364016,9606. ENSP00000365402,9606. ENSP00000377470,9606. ENSP00000379038,9606. ENSP00000379873,9606. ENSP00000381601,9606. ENSP00000388001,9606. ENSP00000395590,9606. ENSP00000399168,9606. ENSP00000417901,9606. ENSP00000464813 | OAS3, EIF2AK2, C19orf66, CMPK2, OASL, TRAFD1, HTRA2, GGH, IPO5, PML, AKAP8, HK2, STAT2, MX2, STAT1, PPOX, ADAR, IFIT1, IFIT3, CUTA, PSMB8, HLA-C, CNP, TYMP, HLA-A, MX1, OAS1, IFI35, HLAB, GPHN, RPL27                  |
| GO:0045088 | regulation of innate immune response                     | 7  | 361  | 0.65 | 1.42E-02 | 9606. ENSP00000251642,9606. ENSP00000257604,9606. ENSP00000354394,9606. ENSP00000357459,9606. ENSP00000379873,9606. ENSP00000399168,9606. ENSP00000418194                                                                                                                                                                                                                                                                                                                                                                                                                                                                                                                                                 | DHX58, TRAFD1, STAT1, ADAR, HLA-A, HLA-B, PARP14                                                                                                                                                                         |
| GO:0019538 | protein metabolic process                                | 31 | 4194 | 0.23 | 1.45E-02 | 9606. ENSP00000225719,9606. ENSP00000226299,9606. ENSP00000233057,9606. ENSP00000249066,9606. ENSP00000258080,9606. ENSP00000260118,9606. ENSP00000268058,9606. ENSP00000270586,9606. ENSP00000296674,9606. ENSP00000307705,9606. ENSP00000325618,9606. ENSP00000333266,9606. ENSP00000339095,9606. ENSP00000346015,9606. ENSP00000347495,9606. ENSP00000355330,9606. ENSP00000363993,9606. ENSP00000364016,9606. ENSP00000379506,9606. ENSP00000379873,9606. ENSP00000386717,9606. ENSP00000393241,9606. ENSP00000398131,9606. ENSP00000416429,9606. ENSP00000417901,9606. ENSP00000418194,9606. ENSP00000464036,9606. ENSP00000464087,9606. ENSP00000464342,9606. ENSP00000464813,9606. ENSP00000479106 | CPD, LAP3, EIF2AK2, APOL2, HTRA2, GGH, PML, PSMB6, RPS23, HIST1H1E, PARP10, UBA7, RPS7, RPL27A, WARS, TGM2, PSMB9, PSMB8, RPL14, HLA-A, RPL31, RPS18, GSPT1, RPL32, GPHN, PARP14, CDK11B, RNF213, RPL36, RPL27, HIST1H4A |
| GO:0010605 | negative regulation of macromolecule metabolic process   | 22 | 2558 | 0.3  | 1.50E-02 | 9606. ENSP00000233057,9606. ENSP00000261574,9606. ENSP00000268058,9606. ENSP00000296674,9606. ENSP00000307705,9606. ENSP00000325618,9606. ENSP00000339095,9606. ENSP00000346015,9606. ENSP00000347495,9606. ENSP00000354394,9606. ENSP00000357459,9606. ENSP00000379506,9606. ENSP00000386717,9606. ENSP00000393241,9606. ENSP00000398131,9606. ENSP00000399888,9606. ENSP00000410769,9606. ENSP00000416429,9606. ENSP00000418194,9606. ENSP00000464342,9606. ENSP00000464813,9606. ENSP00000479106                                                                                                                                                                                                       | EIF2AK2, IPO5, PML, RPS23, HIST1H1E, PARP10, RPS7, RPL27A, WARS, STAT1, ADAR, RPL14, RPL31, RPS18, GSPT1, HMGA1, CNBP, RPL32, PARP14, RPL36, RPL27, HIST1H4A                                                             |
| GO:0051169 | nuclear transport                                        | 6  | 267  | 0.71 | 1.53E-02 | 9606. ENSP00000261574,9606. ENSP00000268058,9606. ENSP00000357459,9606. ENSP00000392985,9606. ENSP00000399888,9606. ENSP00000400591                                                                                                                                                                                                                                                                                                                                                                                                                                                                                                                                                                       | IPO5, PML, ADAR, HTATIP2, HMGA1, SNRPE                                                                                                                                                                                   |

|            |                                                                                      |    |      |      |          |                                                                                                                                                                                                                                                                                                                                                                                                                                                                                                                                                                                                                                                                                                                                 |                                                                                                                                                                                            |
|------------|--------------------------------------------------------------------------------------|----|------|------|----------|---------------------------------------------------------------------------------------------------------------------------------------------------------------------------------------------------------------------------------------------------------------------------------------------------------------------------------------------------------------------------------------------------------------------------------------------------------------------------------------------------------------------------------------------------------------------------------------------------------------------------------------------------------------------------------------------------------------------------------|--------------------------------------------------------------------------------------------------------------------------------------------------------------------------------------------|
| GO:0080134 | regulation of response to stress                                                     | 14 | 1299 | 0.39 | 1.84E-02 | 9606. ENSP00000233057,9606. ENSP00000251642,9606. ENSP00000257604,9606. ENSP00000258080,9606. ENSP00000261517,9606. ENSP00000268058,9606. ENSP00000354394,9606. ENSP0000035530,9606. ENSP00000357459,9606. ENSP00000360869,9606. ENSP00000379873,9606. ENSP00000399168,9606. ENSP00000399888,9606. ENSP00000418194                                                                                                                                                                                                                                                                                                                                                                                                              | EIF2AK2,DHX58,TRAFD1,HTRA2,VPS13C,PML,STAT1,TGM2,ADAR,IFIT1,HLA-A,HLA-B,HMGA1,PARP14                                                                                                       |
| GO:0035457 | cellular response to interferon-alpha                                                | 2  | 12   | 1.58 | 2.07E-02 | 9606. ENSP00000360883,9606. ENSP00000388001                                                                                                                                                                                                                                                                                                                                                                                                                                                                                                                                                                                                                                                                                     | IFIT3,OAS1                                                                                                                                                                                 |
| GO:0002698 | negative regulation of immune effector process                                       | 4  | 113  | 0.91 | 2.09E-02 | 9606. ENSP00000251642,9606. ENSP00000360869,9606. ENSP00000379873,9606. ENSP00000399168                                                                                                                                                                                                                                                                                                                                                                                                                                                                                                                                                                                                                                         | DHX58,IFIT1,HLA-A,HLA-B                                                                                                                                                                    |
| GO:0010467 | gene expression                                                                      | 28 | 3733 | 0.24 | 2.17E-02 | 9606. ENSP00000225719,9606. ENSP00000233057,9606. ENSP00000258080,9606. ENSP00000267935,9606. ENSP00000268058,9606. ENSP00000269701,9606. ENSP00000293677,9606. ENSP00000296674,9606. ENSP00000315768,9606. ENSP00000339095,9606. ENSP00000346015,9606. ENSP00000347495,9606. ENSP00000354394,9606. ENSP00000357459,9606. ENSP00000374399,9606. ENSP00000379506,9606. ENSP00000386717,9606. ENSP00000393241,9606. ENSP00000398131,9606. ENSP00000399888,9606. ENSP00000400591,9606. ENSP00000410769,9606. ENSP00000416429,9606. ENSP00000418194,9606. ENSP00000420588,9606. ENSP00000464342,9606. ENSP00000464813,9606. ENSP00000479106                                                                                         | CPD,EIF2AK2,HTRA2,COMMD4,PML,AKAP8,RAVER1,RPS23,STAT2,RPS7,RPL27A,WARS,STAT1,ADAR,TRMT61A,RPL14,RPL31,RPS18,GSPT1,HMGA1,SNRPE,CNBP,RPL32,PARP14,TFAM,RPL36,RPL27,HIST1H4A                  |
| GO:1904923 | regulation of autophagy of mitochondrion in response to mitochondrial depolarization | 2  | 13   | 1.55 | 2.31E-02 | 9606. ENSP00000258080,9606. ENSP00000290573                                                                                                                                                                                                                                                                                                                                                                                                                                                                                                                                                                                                                                                                                     | HTRA2,HK2                                                                                                                                                                                  |
| GO:0022613 | ribonucleoprotein complex biogenesis                                                 | 7  | 409  | 0.6  | 2.61E-02 | 9606. ENSP00000296674,9606. ENSP00000339095,9606. ENSP00000357459,9606. ENSP00000379506,9606. ENSP00000393241,9606. ENSP00000400591,9606. ENSP00000464813                                                                                                                                                                                                                                                                                                                                                                                                                                                                                                                                                                       | RPS23,RPS7,ADAR,RPL14,RPS18,SNRPE,RPL27                                                                                                                                                    |
| GO:0044249 | cellular biosynthetic process                                                        | 32 | 4567 | 0.21 | 2.65E-02 | 9606. ENSP00000233057,9606. ENSP00000256722,9606. ENSP00000267935,9606. ENSP00000268058,9606. ENSP00000269701,9606. ENSP00000290573,9606. ENSP00000296674,9606. ENSP00000300688,9606. ENSP00000315768,9606. ENSP00000325618,9606. ENSP00000339095,9606. ENSP00000346015,9606. ENSP00000347495,9606. ENSP00000354394,9606. ENSP00000356978,9606. ENSP00000377470,9606. ENSP00000379038,9606. ENSP00000379506,9606. ENSP00000386717,9606. ENSP00000388001,9606. ENSP00000393241,9606. ENSP00000398131,9606. ENSP00000399888,9606. ENSP00000400591,9606. ENSP00000410769,9606. ENSP00000416429,9606. ENSP00000417901,9606. ENSP00000418194,9606. ENSP00000420588,9606. ENSP00000464342,9606. ENSP00000464813,9606. ENSP00000479106 | EIF2AK2,CMPK2,COMMD4,PML,AKAP8,HK2,RPS23,ATP5L,STAT2,PARP10,RPS7,RPL27A,WARS,STAT1,PPOX,CNP,TYMP,RPL14,RPL31,OAS1,RPS18,GSPT1,HMGA1,SNRPE,CNBP,RPL32,GPHN,PARP14,TFAM,RPL36,RPL27,HIST1H4A |

|            |                                                        |    |      |      |          |                                                                                                                                                                                                                                                                                                                                                                                                                                                                                                                                                                                        |                                                                                                                                                                         |
|------------|--------------------------------------------------------|----|------|------|----------|----------------------------------------------------------------------------------------------------------------------------------------------------------------------------------------------------------------------------------------------------------------------------------------------------------------------------------------------------------------------------------------------------------------------------------------------------------------------------------------------------------------------------------------------------------------------------------------|-------------------------------------------------------------------------------------------------------------------------------------------------------------------------|
| GO:0044267 | cellular protein metabolic process                     | 27 | 3603 | 0.24 | 2.65E-02 | 9606.ENSP00000233057,9606.ENSP00000258080,9606.ENSP00000268058,9606.ENSP00000270586,9606.ENSP00000296674,9606.ENSP00000307705,9606.ENSP00000325618,9606.ENSP00000333266,9606.ENSP00000339095,9606.ENSP00000346015,9606.ENSP00000347495,9606.ENSP00000355330,9606.ENSP00000363993,9606.ENSP00000364016,9606.ENSP00000379506,9606.ENSP00000379873,9606.ENSP00000386717,9606.ENSP00000393241,9606.ENSP00000398131,9606.ENSP00000416429,9606.ENSP00000417901,9606.ENSP00000418194,9606.ENSP00000464036,9606.ENSP00000464087,9606.ENSP00000464342,9606.ENSP00000464813,9606.ENSP00000479106 | EIF2AK2,HTRA2,PML,PSMB6,RPS23,HIST1H1E,PARP10,UBA7,RPS7,RPL27A,WARS,TGM2,PSMB9,PSMB8,RPL14,HLA-A,RPL31,RPS18,GSPT1,RPL32,GPHN,PARP14,CDK11B,RNF213,RPL36,RPL27,HIST1H4A |
| GO:0016070 | RNA metabolic process                                  | 26 | 3430 | 0.24 | 2.77E-02 | 9606.ENSP00000233057,9606.ENSP00000267935,9606.ENSP00000268058,9606.ENSP00000269701,9606.ENSP00000293677,9606.ENSP00000296674,9606.ENSP00000315768,9606.ENSP00000339095,9606.ENSP00000346015,9606.ENSP00000347495,9606.ENSP00000354394,9606.ENSP00000357459,9606.ENSP00000374399,9606.ENSP00000379506,9606.ENSP00000386717,9606.ENSP00000393241,9606.ENSP00000398131,9606.ENSP00000399888,9606.ENSP00000400591,9606.ENSP00000410769,9606.ENSP00000416429,9606.ENSP00000418194,9606.ENSP00000420588,9606.ENSP00000464342,9606.ENSP00000464813,9606.ENSP00000479106                      | EIF2AK2,COMMD4,PML,AKAP8,RAVER1,RPS23,STAT2,RPS7,RPL27A,WARS,STAT1,ADAR,TRMT61A,RPL14,RPL31,RPS18,GSPT1,HMGA1,SNRPE,CNBP,RPL32,PARP14,TFAM,RPL36,RPL27,HIST1H4A         |
| GO:0016045 | detection of bacterium                                 | 2  | 15   | 1.49 | 2.83E-02 | 9606.ENSP00000379873,9606.ENSP00000399168                                                                                                                                                                                                                                                                                                                                                                                                                                                                                                                                              | HLA-A,HLA-B                                                                                                                                                             |
| GO:0035458 | cellular response to interferon-beta                   | 2  | 15   | 1.49 | 2.83E-02 | 9606.ENSP00000258080,9606.ENSP00000354394                                                                                                                                                                                                                                                                                                                                                                                                                                                                                                                                              | HTRA2,STAT1                                                                                                                                                             |
| GO:0055086 | nucleobase-containing small molecule metabolic process | 9  | 662  | 0.5  | 2.83E-02 | 9606.ENSP00000256722,9606.ENSP00000290573,9606.ENSP00000300688,9606.ENSP00000325618,9606.ENSP00000367939,9606.ENSP00000377470,9606.ENSP00000379038,9606.ENSP00000388001,9606.ENSP00000417901                                                                                                                                                                                                                                                                                                                                                                                           | CMPK2,HK2,ATP5L,PARP10,UQCRCQ,CNP,TYMP,OAS1,GPHN                                                                                                                        |
| GO:1901524 | regulation of mitophagy                                | 2  | 15   | 1.49 | 2.83E-02 | 9606.ENSP00000258080,9606.ENSP00000261517                                                                                                                                                                                                                                                                                                                                                                                                                                                                                                                                              | HTRA2,VPS13C                                                                                                                                                            |

|            |                                                     |    |      |      |          |                                                                                                                                                                                                                                                                                                                                                                                                                                                                                                                                                                                                                                                                                                                                                                                                                                                                                                                                                                                                                                                                                                                                                          |                                                                                                                                                                                                                                                                                                                         |
|------------|-----------------------------------------------------|----|------|------|----------|----------------------------------------------------------------------------------------------------------------------------------------------------------------------------------------------------------------------------------------------------------------------------------------------------------------------------------------------------------------------------------------------------------------------------------------------------------------------------------------------------------------------------------------------------------------------------------------------------------------------------------------------------------------------------------------------------------------------------------------------------------------------------------------------------------------------------------------------------------------------------------------------------------------------------------------------------------------------------------------------------------------------------------------------------------------------------------------------------------------------------------------------------------|-------------------------------------------------------------------------------------------------------------------------------------------------------------------------------------------------------------------------------------------------------------------------------------------------------------------------|
| GO:0071704 | organic substance metabolic process                 | 53 | 9135 | 0.13 | 3.09E-02 | 9606.ENSP00000225719,9606.ENSP00000226299,9606.ENSP00000228928,9606.ENSP00000233057,9606.ENSP00000249066,9606.ENSP00000256722,9606.ENSP00000258080,9606.ENSP00000260118,9606.ENSP00000267935,9606.ENSP00000268058,9606.ENSP00000269701,9606.ENSP00000270586,9606.ENSP00000290573,9606.ENSP00000293677,9606.ENSP00000296674,9606.ENSP00000300688,9606.ENSP00000307705,9606.ENSP00000315768,9606.ENSP00000325618,9606.ENSP00000333266,9606.ENSP00000339095,9606.ENSP00000346015,9606.ENSP00000347495,9606.ENSP00000354394,9606.ENSP00000355330,9606.ENSP00000356978,9606.ENSP00000357459,9606.ENSP00000359300,9606.ENSP00000363993,9606.ENSP00000364016,9606.ENSP00000367939,9606.ENSP00000374399,9606.ENSP00000377470,9606.ENSP00000379038,9606.ENSP00000379506,9606.ENSP00000379873,9606.ENSP00000386717,9606.ENSP00000388001,9606.ENSP00000393241,9606.ENSP00000398131,9606.ENSP00000399888,9606.ENSP00000400591,9606.ENSP00000404833,9606.ENSP00000410769,9606.ENSP00000416429,9606.ENSP00000417901,9606.ENSP00000418194,9606.ENSP00000420588,9606.ENSP00000464036,9606.ENSP00000464087,9606.ENSP00000464342,9606.ENSP00000464813,9606.ENSP00000479106 | CPD,LAP3,OAS3,EIF2AK2,APOL2,CMPK2,HTRA2,GGH,COMMD4,PML,AKAP8,PSMB6,HK2,RAVER1,RPS23,ATP5L,HIST1H1E,STAT2,PARP10,UBA7,RPS7,RPL27A,WARS,STAT1,TGM2,PPOX,ADAR,CETN2,PSMB9,PSMB8,UQCRQ,TRMT61A,CNP,TYMP,RPL14,HLA-A,RPL31,OAS1,RPS18,GSPT1,HMGA1,SNRPE,TAPBP,CNBP,RPL32,GPHN,PARP14,TFAM,CDK11B,RNF213,RPL36,RPL27,HIST1H4A |
| GO:0001916 | positive regulation of T cell mediated cytotoxicity | 2  | 17   | 1.43 | 3.40E-02 | 9606.ENSP00000379873,9606.ENSP00000399168                                                                                                                                                                                                                                                                                                                                                                                                                                                                                                                                                                                                                                                                                                                                                                                                                                                                                                                                                                                                                                                                                                                | HLA-A,HLA-B                                                                                                                                                                                                                                                                                                             |
| GO:1901576 | organic substance biosynthetic process              | 32 | 4656 | 0.2  | 3.42E-02 | 9606.ENSP00000233057,9606.ENSP00000256722,9606.ENSP00000267935,9606.ENSP00000268058,9606.ENSP00000269701,9606.ENSP00000290573,9606.ENSP00000296674,9606.ENSP00000300688,9606.ENSP00000315768,9606.ENSP00000325618,9606.ENSP00000339095,9606.ENSP00000346015,9606.ENSP00000347495,9606.ENSP00000354394,9606.ENSP00000356978,9606.ENSP00000357459,9606.ENSP00000359300,9606.ENSP00000363993,9606.ENSP00000364016,9606.ENSP00000367939,9606.ENSP00000374399,9606.ENSP00000377470,9606.ENSP00000379038,9606.ENSP00000379506,9606.ENSP00000379873,9606.ENSP00000386717,9606.ENSP00000388001,9606.ENSP00000393241,9606.ENSP00000398131,9606.ENSP00000399888,9606.ENSP00000400591,9606.ENSP00000410769,9606.ENSP00000416429,9606.ENSP00000417901,9606.ENSP00000418194,9606.ENSP00000420588,9606.ENSP00000464342,9606.ENSP00000464813,9606.ENSP00000479106                                                                                                                                                                                                                                                                                                       | EIF2AK2,CMPK2,COMMD4,PML,AKAP8,HK2,RPS23,ATP5L,STAT2,PARP10,RPS7,RPL27A,WARS,STAT1,PPOX,CNP,TYMP,RPL14,RPL31,OAS1,RPS18,GSPT1,HMGA1,SNRPE,CNBP,RPL32,GPHN,PARP14,TFAM,RPL36,RPL27,HIST1H4A                                                                                                                              |
| GO:0043555 | regulation of translation in response to stress     | 2  | 18   | 1.41 | 3.70E-02 | 9606.ENSP00000233057,9606.ENSP00000268058                                                                                                                                                                                                                                                                                                                                                                                                                                                                                                                                                                                                                                                                                                                                                                                                                                                                                                                                                                                                                                                                                                                | EIF2AK2,PML                                                                                                                                                                                                                                                                                                             |
| GO:0034622 | cellular protein-containing complex assembly        | 10 | 832  | 0.44 | 3.73E-02 | 9606.ENSP00000296674,9606.ENSP00000307705,9606.ENSP00000333657,9606.ENSP00000357459,9606.ENSP00000359300,9606.ENSP00000378563,9606.ENSP00000381601,9606.ENSP00000400591,9606.ENSP00000420588,9606.ENSP00000479106                                                                                                                                                                                                                                                                                                                                                                                                                                                                                                                                                                                                                                                                                                                                                                                                                                                                                                                                        | RPS23,HIST1H1E,MX2,ADAR,CETN2,PFDN6,MX1,SNRPE,TFAM,HIST1H4A                                                                                                                                                                                                                                                             |
| GO:0000266 | mitochondrial fission                               | 2  | 19   | 1.38 | 4.03E-02 | 9606.ENSP00000333657,9606.ENSP00000381601                                                                                                                                                                                                                                                                                                                                                                                                                                                                                                                                                                                                                                                                                                                                                                                                                                                                                                                                                                                                                                                                                                                | MX2,MX1                                                                                                                                                                                                                                                                                                                 |
| GO:0031065 | positive regulation of histone deacetylation        | 2  | 19   | 1.38 | 4.03E-02 | 9606.ENSP00000268058,9606.ENSP00000269701                                                                                                                                                                                                                                                                                                                                                                                                                                                                                                                                                                                                                                                                                                                                                                                                                                                                                                                                                                                                                                                                                                                | PML,AKAP8                                                                                                                                                                                                                                                                                                               |
| GO:0009117 | nucleotide metabolic process                        | 8  | 576  | 0.5  | 4.04E-02 | 9606.ENSP00000256722,9606.ENSP00000290573,9606.ENSP00000300688,9606.ENSP00000325618,9606.ENSP00000367939,9606.ENSP00000377470,9606.ENSP00000388001,9606.ENSP00000417901                                                                                                                                                                                                                                                                                                                                                                                                                                                                                                                                                                                                                                                                                                                                                                                                                                                                                                                                                                                  | CMPK2,HK2,ATP5L,PARP10,UQCRQ,CNP,OAS1,GPHN                                                                                                                                                                                                                                                                              |

|            |                            |    |      |      |          |                                                                                                                                                                                                                                                                                                                                                                                                                                                                                                                                                                                                                                                                                                                                                                                                                                                                                                                                                                                                                                                                                                                                                                                                                            |                                                                                                                                                                                                                                                                                                                                                                        |
|------------|----------------------------|----|------|------|----------|----------------------------------------------------------------------------------------------------------------------------------------------------------------------------------------------------------------------------------------------------------------------------------------------------------------------------------------------------------------------------------------------------------------------------------------------------------------------------------------------------------------------------------------------------------------------------------------------------------------------------------------------------------------------------------------------------------------------------------------------------------------------------------------------------------------------------------------------------------------------------------------------------------------------------------------------------------------------------------------------------------------------------------------------------------------------------------------------------------------------------------------------------------------------------------------------------------------------------|------------------------------------------------------------------------------------------------------------------------------------------------------------------------------------------------------------------------------------------------------------------------------------------------------------------------------------------------------------------------|
| GO:0044237 | cellular metabolic process | 51 | 8797 | 0.13 | 4.09E-02 | <p>9606. ENSP00000225719, 9606. ENSP00000228928, 9606. ENSP00000233057, 9606. ENSP00000256722, 9606. ENSP00000258080, 9606. ENSP00000260118, 9606. ENSP00000267935, 9606. ENSP00000268058, 9606. ENSP00000269701, 9606. ENSP00000270586, 9606. ENSP00000290573, 9606. ENSP00000293677, 9606. ENSP00000296674, 9606. ENSP00000300688, 9606. ENSP00000307705, 9606. ENSP00000315768, 9606. ENSP00000325618, 9606. ENSP00000333266, 9606. ENSP00000339095, 9606. ENSP00000346015, 9606. ENSP00000347495, 9606. ENSP00000354394, 9606. ENSP00000355330, 9606. ENSP00000356978, 9606. ENSP00000357459, 9606. ENSP00000359300, 9606. ENSP00000363993, 9606. ENSP00000364016, 9606. ENSP00000367939, 9606. ENSP00000374399, 9606. ENSP00000377470, 9606. ENSP00000379038, 9606. ENSP00000379506, 9606. ENSP00000379873, 9606. ENSP00000386717, 9606. ENSP00000388001, 9606. ENSP00000393241, 9606. ENSP00000398131, 9606. ENSP00000399888, 9606. ENSP00000400591, 9606. ENSP00000404833, 9606. ENSP00000410769, 9606. ENSP00000416429, 9606. ENSP00000417901, 9606. ENSP00000418194, 9606. ENSP00000420588, 9606. ENSP00000464036, 9606. ENSP00000464087, 9606. ENSP00000464342, 9606. ENSP00000464813, 9606. ENSP00000479106</p> | <p>CPD, OAS3, EIF2AK2, CMPK2, HTRA2, GGH, COMMD4, PML, AKAP8, PSMB6, HK2, RAVER1, RPS23, ATP5L, HIST1H1E, STAT2, PARP10, UBA7, RPS7, RPL27A, WARS, STAT1, TGM2, PPOX, ADAR, CETN2, PSMB9, PSMB8, UQCRCQ, TRMT61A, CNP, TYMP, RPL14, HLA-A, RPL31, OAS1, RPS18, GSPT1, HMGA1, SNRPE, TAPBP, CNBP, RPL32, GPHN, PARP14, TFAM, CDK11B, RNF213, RPL36, RPL27, HIST1H4A</p> |
| GO:0044238 | primary metabolic process  | 51 | 8808 | 0.12 | 4.17E-02 | <p>9606. ENSP00000225719, 9606. ENSP00000226299, 9606. ENSP00000228928, 9606. ENSP00000233057, 9606. ENSP00000249066, 9606. ENSP00000256722, 9606. ENSP00000258080, 9606. ENSP00000260118, 9606. ENSP00000267935, 9606. ENSP00000268058, 9606. ENSP00000269701, 9606. ENSP00000270586, 9606. ENSP00000290573, 9606. ENSP00000293677, 9606. ENSP00000296674, 9606. ENSP00000300688, 9606. ENSP00000307705, 9606. ENSP00000315768, 9606. ENSP00000325618, 9606. ENSP00000333266, 9606. ENSP00000339095, 9606. ENSP00000346015, 9606. ENSP00000347495, 9606. ENSP00000354394, 9606. ENSP00000355330, 9606. ENSP00000357459, 9606. ENSP00000359300, 9606. ENSP00000363993, 9606. ENSP00000364016, 9606. ENSP00000367939, 9606. ENSP00000374399, 9606. ENSP00000377470, 9606. ENSP00000379038, 9606. ENSP00000379506, 9606. ENSP00000379873, 9606. ENSP00000386717, 9606. ENSP00000388001, 9606. ENSP00000393241, 9606. ENSP00000398131, 9606. ENSP00000399888, 9606. ENSP00000400591, 9606. ENSP00000410769, 9606. ENSP00000416429, 9606. ENSP00000417901, 9606. ENSP00000418194, 9606. ENSP00000420588, 9606. ENSP00000464036, 9606. ENSP00000464087, 9606. ENSP00000464342, 9606. ENSP00000464813, 9606. ENSP00000479106</p> | <p>CPD, LAP3, OAS3, EIF2AK2, APOL2, CMPK2, HTRA2, GGH, COMMD4, PML, AKAP8, PSMB6, HK2, RAVER1, RPS23, ATP5L, HIST1H1E, STAT2, PARP10, UBA7, RPS7, RPL27A, WARS, STAT1, TGM2, ADAR, CETN2, PSMB9, PSMB8, UQCRCQ, TRMT61A, CNP, TYMP, RPL14, HLA-A, RPL31, OAS1, RPS18, GSPT1, HMGA1, SNRPE, CNBP, RPL32, GPHN, PARP14, TFAM, CDK11B, RNF213, RPL36, RPL27, HIST1H4A</p> |

|            |                                               |    |      |      |          |                                                                                                                                                                                                                                                                                                                                                                                                                                                                                                                                                                                                                                                                                                                                                                                                                                                                                                                                                                                                                                                                                                                                                                               |                                                                                                                                                                                                                                                                                                                                 |
|------------|-----------------------------------------------|----|------|------|----------|-------------------------------------------------------------------------------------------------------------------------------------------------------------------------------------------------------------------------------------------------------------------------------------------------------------------------------------------------------------------------------------------------------------------------------------------------------------------------------------------------------------------------------------------------------------------------------------------------------------------------------------------------------------------------------------------------------------------------------------------------------------------------------------------------------------------------------------------------------------------------------------------------------------------------------------------------------------------------------------------------------------------------------------------------------------------------------------------------------------------------------------------------------------------------------|---------------------------------------------------------------------------------------------------------------------------------------------------------------------------------------------------------------------------------------------------------------------------------------------------------------------------------|
| GO:0071840 | cellular component organization or biogenesis | 35 | 5342 | 0.18 | 4.21E-02 | 9606.ENSP00000258080,9606.ENSP00000261517,9606.ENSP00000268058,9606.ENSP00000269701,9606.ENSP00000290573,9606.ENSP00000296674,9606.ENSP00000300688,9606.ENSP00000307705,9606.ENSP00000333657,9606.ENSP00000339095,9606.ENSP00000355330,9606.ENSP00000357459,9606.ENSP00000359300,9606.ENSP00000374566,9606.ENSP00000377390,9606.ENSP00000377470,9606.ENSP00000378563,9606.ENSP00000379038,9606.ENSP00000379506,9606.ENSP00000379873,9606.ENSP00000381601,9606.ENSP00000388001,9606.ENSP00000393241,9606.ENSP00000398131,9606.ENSP00000399888,9606.ENSP00000400591,9606.ENSP00000404833,9606.ENSP00000417901,9606.ENSP00000420588,9606.ENSP00000464087,9606.ENSP00000464813,9606.ENSP00000471242,9606.ENSP00000478061,9606.ENSP00000479106,9606.ENSP00000484121                                                                                                                                                                                                                                                                                                                                                                                                                | HTRA2,VPS13C,PML,AKAP8,HK2,RPS23,ATP5L,HIST1H1E,MX2,RPS7,TGM2,ADAR,CETN2,KIF19,PPP6R3,CNP,PFND6,TYMP,RPL14,HLA-A,MX1,OAS1,RPS18,GSPT1,HMGA1,SNRPE,TAPBP,GPHN,TFAM,RNF213,RPL27,FARP1,MARCKS,HIST1H4A,ARFIP2                                                                                                                     |
| GO:0010821 | regulation of mitochondrion organization      | 4  | 148  | 0.79 | 4.43E-02 | 9606.ENSP00000258080,9606.ENSP00000261517,9606.ENSP00000290573,9606.ENSP00000315768                                                                                                                                                                                                                                                                                                                                                                                                                                                                                                                                                                                                                                                                                                                                                                                                                                                                                                                                                                                                                                                                                           | HTRA2,VPS13C,HK2,STAT2                                                                                                                                                                                                                                                                                                          |
| GO:0009141 | nucleoside triphosphate metabolic process     | 5  | 246  | 0.67 | 4.75E-02 | 9606.ENSP00000256722,9606.ENSP00000290573,9606.ENSP00000300688,9606.ENSP00000367939,9606.ENSP00000417901                                                                                                                                                                                                                                                                                                                                                                                                                                                                                                                                                                                                                                                                                                                                                                                                                                                                                                                                                                                                                                                                      | CMPK2,HK2,ATP5L,UQCRCQ,GPHN                                                                                                                                                                                                                                                                                                     |
| GO:0008152 | metabolic process                             | 54 | 9569 | 0.11 | 4.81E-02 | 9606.ENSP00000225719,9606.ENSP00000226299,9606.ENSP00000228928,9606.ENSP00000233057,9606.ENSP00000249066,9606.ENSP00000256722,9606.ENSP00000258080,9606.ENSP00000260118,9606.ENSP00000267935,9606.ENSP00000268058,9606.ENSP00000269701,9606.ENSP00000270586,9606.ENSP00000290573,9606.ENSP00000293677,9606.ENSP00000296674,9606.ENSP00000300688,9606.ENSP00000307705,9606.ENSP00000315768,9606.ENSP00000325618,9606.ENSP00000333266,9606.ENSP00000339095,9606.ENSP00000346015,9606.ENSP00000347495,9606.ENSP00000354394,9606.ENSP00000355330,9606.ENSP00000356978,9606.ENSP00000357459,9606.ENSP00000359300,9606.ENSP00000363993,9606.ENSP00000364016,9606.ENSP00000367939,9606.ENSP00000374399,9606.ENSP00000377470,9606.ENSP00000379038,9606.ENSP00000379506,9606.ENSP00000379873,9606.ENSP00000386717,9606.ENSP00000388001,9606.ENSP00000392985,9606.ENSP00000393241,9606.ENSP00000398131,9606.ENSP00000399888,9606.ENSP00000400591,9606.ENSP00000404833,9606.ENSP00000410769,9606.ENSP00000416429,9606.ENSP00000417901,9606.ENSP00000418194,9606.ENSP00000420588,9606.ENSP00000464036,9606.ENSP00000464087,9606.ENSP00000464342,9606.ENSP00000464813,9606.ENSP00000479106 | CPD,LAP3,OAS3,EIF2AK2,APOL2,CMPK2,HTRA2,GGH,COMMD4,PML,AKAP8,PSMB6,HK2,RAVER1,RPS23,ATP5L,HIST1H1E,STAT2,PARP10,UBA7,RPS7,RPL27A,WARS,STAT1,TGM2,PPOX,ADAR,CETN2,PSMB9,PSMB8,UQCRCQ,TRMT61A,CNP,TYMP,RPL14,HLA-A,RPL31,OAS1,HTATIP2,RPS18,GSPT1,HMGA1,SNRPE,TAPBP,CNP,RPL32,GPHN,PARP14,TFAM,CDK11B,RNF213,RPL36,RPL27,HIST1H4A |

T = 72 h (mock) IFN $\alpha$ 5 / Untreated

| #Term ID   | Term Description                              | Observed Gene Count | Background Gene Count | Strength | False Discovery Rate | Matching Proteins in Your Input (IDs)                                                                                                                                                                                                                                                                                                                                                                                                                                                                                                                                                                                                                                                                                | Matching Proteins in Your Input (Labels)                                                                                                                                                                  |
|------------|-----------------------------------------------|---------------------|-----------------------|----------|----------------------|----------------------------------------------------------------------------------------------------------------------------------------------------------------------------------------------------------------------------------------------------------------------------------------------------------------------------------------------------------------------------------------------------------------------------------------------------------------------------------------------------------------------------------------------------------------------------------------------------------------------------------------------------------------------------------------------------------------------|-----------------------------------------------------------------------------------------------------------------------------------------------------------------------------------------------------------|
| GO:0045087 | innate immune response                        | 27                  | 676                   | 1        | 2.09E-16             | 9606.ENSP00000225698,9606.ENSP00000233057,9606.ENSP00000253110,9606.ENSP00000257570,9606.ENSP00000268058,9606.ENSP00000296161,9606.ENSP00000323889,9606.ENSP00000342278,9606.ENSP00000343023,9606.ENSP00000354394,9606.ENSP00000357459,9606.ENSP00000359490,9606.ENSP00000360860,9606.ENSP00000360883,9606.ENSP00000368699,9606.ENSP00000369213,9606.ENSP00000377344,9606.ENSP00000378217,9606.ENSP00000378786,9606.ENSP00000379873,9606.ENSP00000381601,9606.ENSP00000382707,9606.ENSP00000395590,9606.ENSP00000399168,9606.ENSP00000416561,9606.ENSP00000433138,9606.ENSP00000452780                                                                                                                               | C1QBP,EIF2AK2,C19orf66,OASL,PML,DTX3L,TRIM25,OAS2,SP100,STAT1,ADAR,GBP4,IFIT5,IFIT3,ISG15,DDX58,DDX60,PRKCD,HLA-DRA,HLA-A,MX1,IFITM3,IFI35,HLA-B,CFB,CASP1,B2M                                            |
| GO:0006952 | defense response                              | 33                  | 1234                  | 0.82     | 2.68E-16             | 9606.ENSP00000225698,9606.ENSP00000233057,9606.ENSP00000249066,9606.ENSP00000253110,9606.ENSP00000257570,9606.ENSP00000259206,9606.ENSP00000262776,9606.ENSP00000268058,9606.ENSP00000296161,9606.ENSP00000323889,9606.ENSP00000342278,9606.ENSP00000343023,9606.ENSP00000354394,9606.ENSP00000357459,9606.ENSP00000359490,9606.ENSP00000359787,9606.ENSP00000360860,9606.ENSP00000360883,9606.ENSP00000368699,9606.ENSP00000369213,9606.ENSP00000377344,9606.ENSP00000378217,9606.ENSP00000378786,9606.ENSP00000379873,9606.ENSP00000381601,9606.ENSP00000382707,9606.ENSP00000395590,9606.ENSP00000399168,9606.ENSP00000416066,9606.ENSP00000416561,9606.ENSP00000428085,9606.ENSP00000433138,9606.ENSP00000452780 | C1QBP,EIF2AK2,APOL2,C19orf66,OASL,IL1RN,LGALS3BP,PML,DTX3L,TRIM25,OAS2,SP100,STAT1,ADAR,GBP4,IFI44L,IFIT5,IFIT3,ISG15,DDX58,DDX60,PRKCD,HLA-DRA,HLA-A,MX1,IFITM3,IFI35,HLA-B,SERPINA1,CFB,RPL30,CASP1,B2M |
| GO:0098542 | defense response to other organism            | 29                  | 859                   | 0.92     | 2.68E-16             | 9606.ENSP00000225698,9606.ENSP00000233057,9606.ENSP00000253110,9606.ENSP00000257570,9606.ENSP00000268058,9606.ENSP00000296161,9606.ENSP00000323889,9606.ENSP00000342278,9606.ENSP00000343023,9606.ENSP00000354394,9606.ENSP00000357459,9606.ENSP00000359490,9606.ENSP00000359787,9606.ENSP00000360860,9606.ENSP00000360883,9606.ENSP00000368699,9606.ENSP00000369213,9606.ENSP00000377344,9606.ENSP00000378217,9606.ENSP00000378786,9606.ENSP00000379873,9606.ENSP00000381601,9606.ENSP00000382707,9606.ENSP00000395590,9606.ENSP00000399168,9606.ENSP00000416561,9606.ENSP00000428085,9606.ENSP00000433138,9606.ENSP00000452780                                                                                     | C1QBP,EIF2AK2,C19orf66,OASL,PML,DTX3L,TRIM25,OAS2,SP100,STAT1,ADAR,GBP4,IFI44L,IFIT5,IFIT3,ISG15,DDX58,DDX60,PRKCD,HLA-DRA,HLA-A,MX1,IFITM3,IFI35,HLA-B,CFB,RPL30,CASP1,B2M                               |
| GO:0043901 | negative regulation of multi-organism process | 18                  | 212                   | 1.32     | 6.95E-16             | 9606.ENSP00000225698,9606.ENSP00000233057,9606.ENSP00000253110,9606.ENSP00000257570,9606.ENSP00000257604,9606.ENSP00000268058,9606.ENSP00000323889,9606.ENSP00000325618,9606.ENSP00000343023,9606.ENSP00000354394,9606.ENSP00000357459,9606.ENSP00000360860,9606.ENSP00000368699,9606.ENSP00000374455,9606.ENSP00000379873,9606.ENSP00000381601,9606.ENSP00000382707,9606.ENSP00000399168                                                                                                                                                                                                                                                                                                                            | C1QBP,EIF2AK2,C19orf66,OASL,TRAFD1,PML,TRIM25,PARP10,SP100,STAT1,ADAR,IFIT5,ISG15,SQSTM1,HLA-A,MX1,IFITM3,HLA-B                                                                                           |

|            |                                      |    |      |      |          |                                                                                                                                                                                                                                                                                                                                                                                                                                                                                                                                                                                                                                                                       |                                                                                                                                                                                      |
|------------|--------------------------------------|----|------|------|----------|-----------------------------------------------------------------------------------------------------------------------------------------------------------------------------------------------------------------------------------------------------------------------------------------------------------------------------------------------------------------------------------------------------------------------------------------------------------------------------------------------------------------------------------------------------------------------------------------------------------------------------------------------------------------------|--------------------------------------------------------------------------------------------------------------------------------------------------------------------------------------|
| GO:0051607 | defense response to virus            | 17 | 181  | 1.37 | 1.15E-15 | 9606.ENSP00000233057,9606.ENSP00000253110,9606.ENSP00000257570,9606.ENSP00000268058,9606.ENSP00000296161,9606.ENSP00000323889,9606.ENSP00000342278,9606.ENSP00000354394,9606.ENSP00000357459,9606.ENSP00000359787,9606.ENSP00000360860,9606.ENSP00000360883,9606.ENSP00000368699,9606.ENSP00000369213,9606.ENSP0000037344,9606.ENSP00000381601,9606.ENSP00000382707                                                                                                                                                                                                                                                                                                   | EIF2AK2,C19orf66,OASL,PML,DTX3L,TRIM25,OAS2,STAT1,ADAR,IFI44L,IFIT5,IFIT3,ISG15,DDX58,DDX60,MX1,IFITM3                                                                               |
| GO:0034340 | response to type I interferon        | 13 | 70   | 1.66 | 3.22E-15 | 9606.ENSP00000253110,9606.ENSP00000257570,9606.ENSP00000342278,9606.ENSP00000343023,9606.ENSP00000354394,9606.ENSP00000357459,9606.ENSP00000360883,9606.ENSP00000368699,9606.ENSP00000379873,9606.ENSP00000381601,9606.ENSP00000382707,9606.ENSP00000395590,9606.ENSP00000399168                                                                                                                                                                                                                                                                                                                                                                                      | C19orf66,OASL,OAS2,SP100,STAT1,ADAR,IFIT3,ISG15,HLA-A,MX1,IFITM3,IFI35,HLA-B                                                                                                         |
| GO:0051707 | response to other organism           | 31 | 1173 | 0.82 | 3.22E-15 | 9606.ENSP00000225698,9606.ENSP00000233057,9606.ENSP00000253110,9606.ENSP00000257570,9606.ENSP00000268058,9606.ENSP00000296161,9606.ENSP00000323889,9606.ENSP00000342278,9606.ENSP00000343023,9606.ENSP00000354394,9606.ENSP00000357459,9606.ENSP00000359490,9606.ENSP00000359783,9606.ENSP00000359787,9606.ENSP00000360860,9606.ENSP00000360883,9606.ENSP00000368699,9606.ENSP00000369213,9606.ENSP0000037344,9606.ENSP00000377470,9606.ENSP00000378217,9606.ENSP00000378786,9606.ENSP00000379873,9606.ENSP00000381601,9606.ENSP00000382707,9606.ENSP00000395590,9606.ENSP00000399168,9606.ENSP0000416561,9606.ENSP0000428085,9606.ENSP0000433138,9606.ENSP0000452780 | C1QB,EIF2AK2,C19orf66,OASL,PML,DTX3L,TRIM25,OAS2,SP100,STAT1,ADAR,GBP4,IFI44,IFI44L,IFIT5,IFIT3,ISG15,DDX58,DDX60,CNP,PRKCD,HLA-DRA,HLA-A,MX1,IFITM3,IFI35,HLA-B,CFB,RPL30,CASP1,B2M |
| GO:0009615 | response to virus                    | 18 | 270  | 1.22 | 1.54E-14 | 9606.ENSP00000233057,9606.ENSP00000253110,9606.ENSP00000257570,9606.ENSP00000268058,9606.ENSP00000296161,9606.ENSP00000323889,9606.ENSP00000342278,9606.ENSP00000354394,9606.ENSP00000357459,9606.ENSP00000359783,9606.ENSP00000359787,9606.ENSP00000360860,9606.ENSP00000360883,9606.ENSP00000368699,9606.ENSP00000369213,9606.ENSP0000037344,9606.ENSP00000381601,9606.ENSP00000382707                                                                                                                                                                                                                                                                              | EIF2AK2,C19orf66,OASL,PML,DTX3L,TRIM25,OAS2,STAT1,ADAR,IFI44,IFI44L,IFIT5,IFIT3,ISG15,DDX58,DDX60,MX1,IFITM3                                                                         |
| GO:0060337 | type I interferon signaling pathway  | 12 | 65   | 1.66 | 4.41E-14 | 9606.ENSP00000257570,9606.ENSP00000342278,9606.ENSP00000343023,9606.ENSP00000354394,9606.ENSP00000357459,9606.ENSP00000360883,9606.ENSP00000368699,9606.ENSP00000379873,9606.ENSP00000381601,9606.ENSP00000382707,9606.ENSP00000395590,9606.ENSP00000399168                                                                                                                                                                                                                                                                                                                                                                                                           | OASL,OAS2,SP100,STAT1,ADAR,IFIT3,ISG15,HLA-A,MX1,IFITM3,IFI35,HLA-B                                                                                                                  |
| GO:0048525 | negative regulation of viral process | 13 | 93   | 1.54 | 5.06E-14 | 9606.ENSP00000233057,9606.ENSP00000253110,9606.ENSP00000257570,9606.ENSP00000268058,9606.ENSP00000323889,9606.ENSP00000325618,9606.ENSP00000343023,9606.ENSP00000354394,9606.ENSP00000357459,9606.ENSP00000360860,9606.ENSP00000368699,9606.ENSP00000381601,9606.ENSP00000382707                                                                                                                                                                                                                                                                                                                                                                                      | EIF2AK2,C19orf66,OASL,PML,TRIM25,PARP10,SP100,STAT1,ADAR,IFIT5,ISG15,MX1,IFITM3                                                                                                      |
| GO:0034341 | response to interferon-gamma         | 15 | 176  | 1.32 | 1.83E-13 | 9606.ENSP00000253110,9606.ENSP00000257570,9606.ENSP00000268058,9606.ENSP00000323889,9606.ENSP00000342278,9606.ENSP00000343023,9606.ENSP00000354394,9606.ENSP00000359490,9606.ENSP00000378217,9606.ENSP00000378786,9606.ENSP00000379873,9606.ENSP00000382707,9606.ENSP00000399168,9606.ENSP0000043138,9606.ENSP0000452780                                                                                                                                                                                                                                                                                                                                              | C19orf66,OASL,PML,TRIM25,OAS2,SP100,STAT1,GBP4,PRKCD,HLA-DRA,HLA-A,IFITM3,HLA-B,CASP1,B2M                                                                                            |



|            |                                             |    |      |      |          |                                                                                                                                                                                                                                                                                                                                                                                                                                                                                                                                                                                                                                                                                                                                                                                                        |                                                                                                                                                                                                                                  |
|------------|---------------------------------------------|----|------|------|----------|--------------------------------------------------------------------------------------------------------------------------------------------------------------------------------------------------------------------------------------------------------------------------------------------------------------------------------------------------------------------------------------------------------------------------------------------------------------------------------------------------------------------------------------------------------------------------------------------------------------------------------------------------------------------------------------------------------------------------------------------------------------------------------------------------------|----------------------------------------------------------------------------------------------------------------------------------------------------------------------------------------------------------------------------------|
| GO:0043900 | regulation of multi-organism process        | 23 | 653  | 0.94 | 1.83E-13 | 9606.ENSP00000225698,9606.ENSP00000233057,9606.ENSP00000253110,9606.ENSP00000257570,9606.ENSP00000257604,9606.ENSP0000268058,9606.ENSP00000296161,9606.ENSP00000296577,9606.ENSP00000323889,9606.ENSP00000325618,9606.ENSP00000343023,9606.ENSP00000354394,9606.ENSP00000357459,9606.ENSP00000360860,9606.ENSP00000368699,9606.ENSP00000369213,9606.ENSP00000374455,9606.ENSP00000377344,9606.ENSP00000378217,9606.ENSP00000379873,9606.ENSP00000381601,9606.ENSP00000382707,9606.ENSP00000399168                                                                                                                                                                                                                                                                                                      | C1QBP,EIF2AK2,C19orf66,OASL,TRAFD1,PML,DTX3L,ABCE1,TRIM25,PARP10,SP100,STAT1,ADAR,IFIT5,ISG15,DDX58,SQSTM1,DDX60,PRKCD,HLA-A,MX1,IFITM3,HLA-B                                                                                    |
| GO:0060333 | interferon-gamma-mediated signaling pathway | 11 | 69   | 1.6  | 2.46E-12 | 9606.ENSP00000257570,9606.ENSP00000268058,9606.ENSP00000323889,9606.ENSP00000342278,9606.ENSP00000343023,9606.ENSP00000354394,9606.ENSP00000378217,9606.ENSP00000378786,9606.ENSP00000379873,9606.ENSP00000399168,9606.ENSP00000452780                                                                                                                                                                                                                                                                                                                                                                                                                                                                                                                                                                 | OASL,PML,TRIM25,OAS2,SP100,STAT1,PRKCD,HLA-DRA,HLA-A,HLA-B,B2M                                                                                                                                                                   |
| GO:0006955 | immune response                             | 31 | 1560 | 0.69 | 2.65E-12 | 9606.ENSP00000225698,9606.ENSP00000233057,9606.ENSP00000253110,9606.ENSP00000257570,9606.ENSP00000259206,9606.ENSP0000268058,9606.ENSP00000296161,9606.ENSP00000323889,9606.ENSP00000342278,9606.ENSP00000343023,9606.ENSP00000354394,9606.ENSP00000357459,9606.ENSP00000359490,9606.ENSP00000360860,9606.ENSP00000360883,9606.ENSP00000368699,9606.ENSP00000369213,9606.ENSP00000377344,9606.ENSP00000378217,9606.ENSP00000378786,9606.ENSP00000379873,9606.ENSP00000381601,9606.ENSP00000382707,9606.ENSP00000395590,9606.ENSP00000399168,9606.ENSP00000404833,9606.ENSP00000416066,9606.ENSP00000416561,9606.ENSP00000428085,9606.ENSP00000433138,9606.ENSP00000452780                                                                                                                              | C1QBP,EIF2AK2,C19orf66,OASL,IL1RN,PML,DTX3L,TRIM25,OAS2,SP100,STAT1,ADAR,GBP4,IFIT5,IFIT3,ISG15,DDX58,DDX60,PRKCD,HLA-DRA,HLA-A,MX1,IFITM3,IFI35,HLA-B,TAPBP,SERPINA1,CFB,RPL30,CASP1,B2M                                        |
| GO:0002376 | immune system process                       | 37 | 2370 | 0.59 | 4.21E-12 | 9606.ENSP00000225698,9606.ENSP00000233057,9606.ENSP00000253110,9606.ENSP00000257570,9606.ENSP00000259206,9606.ENSP0000268058,9606.ENSP00000296161,9606.ENSP00000317144,9606.ENSP00000323889,9606.ENSP00000333019,9606.ENSP00000342278,9606.ENSP00000343023,9606.ENSP00000354394,9606.ENSP00000357459,9606.ENSP00000359490,9606.ENSP00000359787,9606.ENSP00000360860,9606.ENSP00000360883,9606.ENSP00000363993,9606.ENSP00000368699,9606.ENSP00000369213,9606.ENSP00000372155,9606.ENSP00000374455,9606.ENSP00000377344,9606.ENSP00000378217,9606.ENSP00000378786,9606.ENSP00000379873,9606.ENSP00000381601,9606.ENSP00000382707,9606.ENSP00000395590,9606.ENSP00000399168,9606.ENSP00000404833,9606.ENSP00000416066,9606.ENSP00000416561,9606.ENSP00000428085,9606.ENSP0000043138,9606.ENSP00000452780 | C1QBP,EIF2AK2,C19orf66,OASL,IL1RN,PML,DTX3L,PIBF1,TRIM25,ADSSL1,OAS2,SP100,STAT1,ADAR,GBP4,IFI44L,IFIT5,IFIT3,PSMB9,ISG15,DDX58,PSME1,SQSTM1,DDX60,PRKCD,HLA-DRA,HLA-A,MX1,IFITM3,IFI35,HLA-B,TAPBP,SERPINA1,CFB,RPL30,CASP1,B2M |

|            |                                                                    |    |      |      |          |                                                                                                                                                                                                                                                                                                                                                                                                                                                                                                                                                                                                                                                                                                                                                                                                                                                                     |                                                                                                                                                                                                                                                                     |
|------------|--------------------------------------------------------------------|----|------|------|----------|---------------------------------------------------------------------------------------------------------------------------------------------------------------------------------------------------------------------------------------------------------------------------------------------------------------------------------------------------------------------------------------------------------------------------------------------------------------------------------------------------------------------------------------------------------------------------------------------------------------------------------------------------------------------------------------------------------------------------------------------------------------------------------------------------------------------------------------------------------------------|---------------------------------------------------------------------------------------------------------------------------------------------------------------------------------------------------------------------------------------------------------------------|
| GO:0051704 | multi-organism process                                             | 38 | 2514 | 0.57 | 4.21E-12 | 9606. ENSP00000225698,9606. ENSP00000233057,9606. ENSP00000244061,9606. ENSP00000249066,9606. ENSP00000253110,9606. ENSP00000257570,9606. ENSP00000268058,9606. ENSP00000296161,9606. ENSP00000296577,9606. ENSP00000323889,9606. ENSP00000334373,9606. ENSP00000342278,9606. ENSP00000343023,9606. ENSP00000354394,9606. ENSP00000355599,9606. ENSP00000357459,9606. ENSP00000359490,9606. ENSP00000359783,9606. ENSP00000359787,9606. ENSP00000360860,9606. ENSP00000360883,9606. ENSP00000363993,9606. ENSP00000368699,9606. ENSP00000369213,9606. ENSP00000371958,9606. ENSP00000377344,9606. ENSP00000377470,9606. ENSP00000378217,9606. ENSP00000378786,9606. ENSP00000379873,9606. ENSP00000381601,9606. ENSP00000382707,9606. ENSP00000395590,9606. ENSP00000399168,9606. ENSP00000416561,9606. ENSP00000428085,9606. ENSP00000433138,9606. ENSP00000452780 | C1QBP, EIF2AK2, RNF114, APOL2, C19orf66, OASL, PML, DTX3L, ABCE1, TRIM25, KPNA4, OAS2, SP100, STAT1, TSNA X, ADAR, GBP4, IFI44, IFI44L, IFIT5, IFIT3, PSMB9, ISG15, DX58, CD9, DDX60, CNP, PRKCD, HLA-DRA, HLA-A, MX1, IFITM3, IFI35, HLA-B, CFB, RPL30, CASP1, B2M |
| GO:1903901 | negative regulation of viral life cycle                            | 11 | 77   | 1.55 | 5.86E-12 | 9606. ENSP00000233057,9606. ENSP00000253110,9606. ENSP00000257570,9606. ENSP00000268058,9606. ENSP00000323889,9606. ENSP00000325618,9606. ENSP00000357459,9606. ENSP00000360860,9606. ENSP00000368699,9606. ENSP00000381601,9606. ENSP00000382707                                                                                                                                                                                                                                                                                                                                                                                                                                                                                                                                                                                                                   | EIF2AK2, C19orf66, OASL, PML, TRIM25, PARP10, ADAR, IFIT5, ISG15, MX1, IFITM3                                                                                                                                                                                       |
| GO:0071346 | cellular response to interferon-gamma                              | 13 | 155  | 1.32 | 1.37E-11 | 9606. ENSP00000257570,9606. ENSP00000268058,9606. ENSP00000323889,9606. ENSP00000342278,9606. ENSP00000343023,9606. ENSP00000354394,9606. ENSP00000359490,9606. ENSP00000378217,9606. ENSP00000378786,9606. ENSP00000379873,9606. ENSP00000399168,9606. ENSP00000433138,9606. ENSP00000452780                                                                                                                                                                                                                                                                                                                                                                                                                                                                                                                                                                       | OASL, PML, TRIM25, OAS2, SP100, STAT1, GBP4, PRKCD, HLA-DRA, HLA-A, HLA-B, CASP1, B2M                                                                                                                                                                               |
| GO:0019221 | cytokine-mediated signaling pathway                                | 21 | 655  | 0.9  | 1.55E-11 | 9606. ENSP00000231487,9606. ENSP00000257570,9606. ENSP00000259206,9606. ENSP00000268058,9606. ENSP00000323889,9606. ENSP00000342278,9606. ENSP00000343023,9606. ENSP00000354394,9606. ENSP00000357459,9606. ENSP00000360883,9606. ENSP00000368699,9606. ENSP00000374455,9606. ENSP00000378217,9606. ENSP00000378786,9606. ENSP00000379873,9606. ENSP00000381601,9606. ENSP00000382707,9606. ENSP00000395590,9606. ENSP00000399168,9606. ENSP00000433138,9606. ENSP00000452780                                                                                                                                                                                                                                                                                                                                                                                       | SKP1, OASL, IL1RN, PML, TRIM25, OAS2, SP100, STAT1, ADAR, IFIT3, ISG15, SQSTM1, PRKCD, HLA-DRA, HLA-A, MX1, IFITM3, IFI35, HLA-B, CASP1, B2M                                                                                                                        |
| GO:0043903 | regulation of symbiosis, encompassing mutualism through parasitism | 14 | 203  | 1.23 | 1.65E-11 | 9606. ENSP00000233057,9606. ENSP00000253110,9606. ENSP00000257570,9606. ENSP00000268058,9606. ENSP00000323889,9606. ENSP00000325618,9606. ENSP00000343023,9606. ENSP00000354394,9606. ENSP00000357459,9606. ENSP00000360860,9606. ENSP00000368699,9606. ENSP00000374455,9606. ENSP00000381601,9606. ENSP00000382707                                                                                                                                                                                                                                                                                                                                                                                                                                                                                                                                                 | EIF2AK2, C19orf66, OASL, PML, TRIM25, PARP10, SP100, STAT1, ADAR, IFIT5, ISG15, SQSTM1, MX1, IFITM3                                                                                                                                                                 |

|            |                               |    |      |      |          |                                                                                                                                                                                                                                                                                                                                                                                                                                                                                                                                                                                                                                                                                                                      |                                                                                                                                                                                                        |
|------------|-------------------------------|----|------|------|----------|----------------------------------------------------------------------------------------------------------------------------------------------------------------------------------------------------------------------------------------------------------------------------------------------------------------------------------------------------------------------------------------------------------------------------------------------------------------------------------------------------------------------------------------------------------------------------------------------------------------------------------------------------------------------------------------------------------------------|--------------------------------------------------------------------------------------------------------------------------------------------------------------------------------------------------------|
| GO:0002252 | immune effector process       | 24 | 927  | 0.81 | 1.67E-11 | 9606.ENSP00000225698,9606.ENSP00000233057,9606.ENSP00000253110,9606.ENSP00000257570,9606.ENSP00000268058,9606.ENSP00000296161,9606.ENSP00000323889,9606.ENSP00000342278,9606.ENSP00000354394,9606.ENSP00000357459,9606.ENSP00000359787,9606.ENSP00000360860,9606.ENSP00000360883,9606.ENSP00000368699,9606.ENSP00000369213,9606.ENSP00000377344,9606.ENSP00000378217,9606.ENSP00000379873,9606.ENSP00000381601,9606.ENSP00000382707,9606.ENSP00000399168,9606.ENSP00000416066,9606.ENSP00000416561,9606.ENSP00000452780                                                                                                                                                                                              | C1QBP,EIF2AK2,C19orf66,OASL,PML,DTX3L,TRIM25,OAS2,STAT1,ADAR,IFI44L,IFIT5,IFIT3,ISG15,DDX58,DDX60,PRKCD,HLA-A,MX1,IFITM3,HLA-B,SERPINA1,CFB,B2M                                                        |
| GO:0034097 | response to cytokine          | 25 | 1035 | 0.78 | 2.00E-11 | 9606.ENSP00000231487,9606.ENSP00000233057,9606.ENSP00000253110,9606.ENSP00000257570,9606.ENSP00000257604,9606.ENSP00000259206,9606.ENSP00000268058,9606.ENSP00000323889,9606.ENSP00000342278,9606.ENSP00000343023,9606.ENSP00000354394,9606.ENSP00000357459,9606.ENSP00000359490,9606.ENSP00000360883,9606.ENSP00000368699,9606.ENSP00000374455,9606.ENSP00000378217,9606.ENSP00000378786,9606.ENSP00000379873,9606.ENSP00000381601,9606.ENSP00000382707,9606.ENSP00000395590,9606.ENSP00000399168,9606.ENSP00000433138,9606.ENSP00000452780                                                                                                                                                                         | SKP1,EIF2AK2,C19orf66,OASL,TRAFD1,IL1RN,PML,TRIM25,OAS2,SP100,STAT1,ADAR,GBP4,IFIT3,ISG15,SQSTM1,PRKCD,HLA-DRA,HLA-A,MX1,IFITM3,IFI35,HLA-B,CASP1,B2M                                                  |
| GO:0009605 | response to external stimulus | 34 | 2152 | 0.59 | 4.02E-11 | 9606.ENSP00000225698,9606.ENSP00000233057,9606.ENSP00000253110,9606.ENSP00000257570,9606.ENSP00000264108,9606.ENSP00000268058,9606.ENSP00000296161,9606.ENSP00000323889,9606.ENSP00000333019,9606.ENSP00000342278,9606.ENSP00000343023,9606.ENSP00000354394,9606.ENSP00000357459,9606.ENSP00000359490,9606.ENSP00000359787,9606.ENSP00000360860,9606.ENSP00000360883,9606.ENSP00000368699,9606.ENSP00000369213,9606.ENSP00000377344,9606.ENSP00000377470,9606.ENSP00000378217,9606.ENSP00000378786,9606.ENSP00000379038,9606.ENSP00000379873,9606.ENSP00000381601,9606.ENSP00000382707,9606.ENSP00000395590,9606.ENSP00000399168,9606.ENSP00000416561,9606.ENSP00000428085,9606.ENSP00000433138,9606.ENSP00000452780 | C1QBP,EIF2AK2,C19orf66,OASL,HAT1,PML,DTX3L,TRIM25,ADSSL1,OAS2,SP100,STAT1,ADAR,GBP4,IFI44,IFI44L,IFIT5,IFIT3,ISG15,DDX58,DDX60,CNP,PRKCD,HLA-DRA,TYMP,HLA-A,MX1,IFITM3,IFI35,HLA-B,CFB,RPL30,CASP1,B2M |

|            |                                                 |    |      |      |          |                                                                                                                                                                                                                                                                                                                                                                                                                                                                                                                                                                                                                                                                                                                                                                                                                                                                                             |                                                                                                                                                                                                                                                          |
|------------|-------------------------------------------------|----|------|------|----------|---------------------------------------------------------------------------------------------------------------------------------------------------------------------------------------------------------------------------------------------------------------------------------------------------------------------------------------------------------------------------------------------------------------------------------------------------------------------------------------------------------------------------------------------------------------------------------------------------------------------------------------------------------------------------------------------------------------------------------------------------------------------------------------------------------------------------------------------------------------------------------------------|----------------------------------------------------------------------------------------------------------------------------------------------------------------------------------------------------------------------------------------------------------|
| GO:0006950 | response to stress                              | 41 | 3267 | 0.49 | 7.28E-11 | 9606.ENSP00000225698,9606.ENSP00000231487,9606.ENSP00000233057,9606.ENSP00000249066,9606.ENSP00000253110,9606.ENSP00000257570,9606.ENSP00000259206,9606.ENSP00000262776,9606.ENSP00000268058,9606.ENSP00000287156,9606.ENSP00000296161,9606.ENSP00000323889,9606.ENSP00000333019,9606.ENSP0000033266,9606.ENSP00000334373,9606.ENSP00000342278,9606.ENSP00000343023,9606.ENSP00000354394,9606.ENSP00000357459,9606.ENSP00000359490,9606.ENSP00000359787,9606.ENSP00000360860,9606.ENSP00000360883,9606.ENSP00000368699,9606.ENSP00000369213,9606.ENSP00000371958,9606.ENSP00000374455,9606.ENSP00000377344,9606.ENSP00000378217,9606.ENSP00000378786,9606.ENSP00000379873,9606.ENSP00000381601,9606.ENSP00000382707,9606.ENSP00000395590,9606.ENSP00000399168,9606.ENSP00000416066,9606.ENSP00000416561,9606.ENSP00000428085,9606.ENSP00000433138,9606.ENSP00000452780,9606.ENSP00000478026 | C1QBP,SKP1,EIF2AK2,APOL2,C19orf66,OASL,IL1RN,LGALS3BP,PML,UBE2L6,DTX3L,TRIM25,ADSSL1,UBA7,KPNA4,OAS2,SP100,STAT1,ADAR,GBP4,IFI44L,IFIT5,IFIT3,ISG15,DDX58,CD9,SQSTM1,DDX60,PRKCD,HLA-DRA,HLA-A,MX1,IFITM3,IFI35,HLA-B,SERPINA1,CFB,RPL30,CASP1,B2M,ANXA8 |
| GO:0045071 | negative regulation of viral genome replication | 9  | 52   | 1.63 | 1.89E-10 | 9606.ENSP00000233057,9606.ENSP00000253110,9606.ENSP00000257570,9606.ENSP00000325618,9606.ENSP00000357459,9606.ENSP00000360860,9606.ENSP00000368699,9606.ENSP00000381601,9606.ENSP00000382707                                                                                                                                                                                                                                                                                                                                                                                                                                                                                                                                                                                                                                                                                                | EIF2AK2,C19orf66,OASL,PARP10,ADAR,IFIT5,ISG15,MX1,IFITM3                                                                                                                                                                                                 |
| GO:0071345 | cellular response to cytokine stimulus          | 22 | 953  | 0.76 | 1.48E-09 | 9606.ENSP00000231487,9606.ENSP00000257570,9606.ENSP00000259206,9606.ENSP00000268058,9606.ENSP00000323889,9606.ENSP00000342278,9606.ENSP00000343023,9606.ENSP00000354394,9606.ENSP00000357459,9606.ENSP00000359490,9606.ENSP00000360883,9606.ENSP00000368699,9606.ENSP00000374455,9606.ENSP00000378217,9606.ENSP00000378786,9606.ENSP00000379873,9606.ENSP00000381601,9606.ENSP00000382707,9606.ENSP00000395590,9606.ENSP00000399168,9606.ENSP00000433138,9606.ENSP00000452780                                                                                                                                                                                                                                                                                                                                                                                                               | SKP1,OASL,IL1RN,PML,TRIM25,OAS2,SP100,STAT1,ADAR,GBP4,IFIT3,ISG15,SQSTM1,PRKCD,HLA-DRA,HLA-A,MX1,IFITM3,IFI35,HLA-B,CASP1,B2M                                                                                                                            |
| GO:0001817 | regulation of cytokine production               | 16 | 615  | 0.81 | 2.31E-07 | 9606.ENSP00000225698,9606.ENSP00000233057,9606.ENSP00000268058,9606.ENSP00000287156,9606.ENSP00000317144,9606.ENSP00000323889,9606.ENSP0000033266,9606.ENSP00000354394,9606.ENSP00000368699,9606.ENSP00000369213,9606.ENSP00000377344,9606.ENSP00000379873,9606.ENSP00000399168,9606.ENSP00000433138,9606.ENSP00000452780,9606.ENSP00000463188                                                                                                                                                                                                                                                                                                                                                                                                                                                                                                                                              | C1QBP,EIF2AK2,PML,UBE2L6,PIBF1,TRIM25,UBA7,STAT1,ISG15,DDX58,DDX60,HLA-A,HLA-B,CASP1,B2M,TRIM16                                                                                                                                                          |
| GO:0016032 | viral process                                   | 15 | 571  | 0.81 | 6.53E-07 | 9606.ENSP00000225698,9606.ENSP00000233057,9606.ENSP00000268058,9606.ENSP00000296577,9606.ENSP00000323889,9606.ENSP00000334373,9606.ENSP00000343023,9606.ENSP00000354394,9606.ENSP00000363993,9606.ENSP00000368699,9606.ENSP00000369213,9606.ENSP00000378786,9606.ENSP00000379873,9606.ENSP0000039168,9606.ENSP00000452780                                                                                                                                                                                                                                                                                                                                                                                                                                                                                                                                                                   | C1QBP,EIF2AK2,PML,ABCE1,TRIM25,KPNA4,SP100,STAT1,PSMB9,ISG15,DDX58,HLA-DRA,HLA-A,HLA-B,B2M                                                                                                                                                               |

|            |                                            |    |      |      |          |                                                                                                                                                                                                                                                                                                                                                                                                                                                                                                                                                                                                                                                                                                                                                                                                                                                   |                                                                                                                                                                                                                                                 |
|------------|--------------------------------------------|----|------|------|----------|---------------------------------------------------------------------------------------------------------------------------------------------------------------------------------------------------------------------------------------------------------------------------------------------------------------------------------------------------------------------------------------------------------------------------------------------------------------------------------------------------------------------------------------------------------------------------------------------------------------------------------------------------------------------------------------------------------------------------------------------------------------------------------------------------------------------------------------------------|-------------------------------------------------------------------------------------------------------------------------------------------------------------------------------------------------------------------------------------------------|
| GO:0010033 | response to organic substance              | 32 | 2815 | 0.45 | 9.00E-07 | 9606.ENSP00000231487,9606.ENSP00000233057,9606.ENSP00000253110,9606.ENSP00000257570,9606.ENSP00000257604,9606.ENSP00000259206,9606.ENSP00000268058,9606.ENSP00000323889,9606.ENSP00000325677,9606.ENSP00000342278,9606.ENSP00000343023,9606.ENSP00000354394,9606.ENSP00000357459,9606.ENSP00000358327,9606.ENSP00000359490,9606.ENSP00000360883,9606.ENSP00000368678,9606.ENSP00000368699,9606.ENSP00000369213,9606.ENSP00000371958,9606.ENSP00000374455,9606.ENSP00000377470,9606.ENSP00000378217,9606.ENSP00000378786,9606.ENSP00000379873,9606.ENSP00000381601,9606.ENSP00000382707,9606.ENSP00000395590,9606.ENSP00000399168,9606.ENSP00000433138,9606.ENSP00000452780,9606.ENSP00000463188                                                                                                                                                   | SKP1,EIF2AK2,C19orf66,OASL,TRAFD1,IL1RN,PML,TRIM25,RNF40,OAS2,SP100,STAT1,ADAR,CASP7,GBP4,IFI3,AGRN,ISG15,DDX58,CD9,SQSTM1,CNP,PRKCD,HLA-DRA,HLA-A,MX1,IFITM3,IFI35,HLA-B,CASP1,B2M,TRIM16                                                      |
| GO:0044419 | interspecies interaction between organisms | 16 | 724  | 0.74 | 1.99E-06 | 9606.ENSP00000225698,9606.ENSP00000233057,9606.ENSP00000268058,9606.ENSP00000296577,9606.ENSP00000323889,9606.ENSP00000334373,9606.ENSP00000343023,9606.ENSP00000354394,9606.ENSP00000363993,9606.ENSP00000368699,9606.ENSP00000369213,9606.ENSP00000378786,9606.ENSP00000379873,9606.ENSP0000039168,9606.ENSP00000428085,9606.ENSP00000452780                                                                                                                                                                                                                                                                                                                                                                                                                                                                                                    | C1QBP,EIF2AK2,PML,ABCE1,TRIM25,KPNA4,SP100,STAT1,PSMB9,ISG15,DDX58,HLA-DRA,HLA-A,HLA-B,RPL30,B2M                                                                                                                                                |
| GO:0019538 | protein metabolic process                  | 39 | 4194 | 0.36 | 2.47E-06 | 9606.ENSP00000161006,9606.ENSP00000225698,9606.ENSP0000026299,9606.ENSP00000231487,9606.ENSP00000233057,9606.ENSP00000244061,9606.ENSP00000249066,9606.ENSP00000264108,9606.ENSP00000268058,9606.ENSP00000287156,9606.ENSP00000296161,9606.ENSP00000296543,9606.ENSP00000296577,9606.ENSP00000306548,9606.ENSP00000317144,9606.ENSP00000323889,9606.ENSP00000325618,9606.ENSP00000325677,9606.ENSP00000333266,9606.ENSP00000347495,9606.ENSP00000355330,9606.ENSP00000358327,9606.ENSP00000363993,9606.ENSP00000366819,9606.ENSP00000368699,9606.ENSP00000369213,9606.ENSP00000372155,9606.ENSP00000374455,9606.ENSP00000378217,9606.ENSP00000379873,9606.ENSP00000381167,9606.ENSP00000416066,9606.ENSP00000416561,9606.ENSP00000428085,9606.ENSP00000433138,9606.ENSP00000452780,9606.ENSP00000463188,9606.ENSP00000464087,9606.ENSP00000464342 | PRSS22,C1QBP,LAP3,SKP1,EIF2AK2,RNF114,APOL2,HA1,T1,PML,UBE2L6,DTX3L,NAA15,ABCE1,MRPL13,PIBF1,TRIM25,PARP10,RNF40,UBA7,WARS,TGM2,CASP7,PSMB9,UCHL3,ISG15,DDX58,PSME1,SQSTM1,PRKCD,HLA-A,DYNC2H1,SERPINA1,CFB,RPL30,CASP1,B2M,TRIM16,RNF213,RPL36 |
| GO:0006508 | proteolysis                                | 20 | 1203 | 0.61 | 2.92E-06 | 9606.ENSP00000161006,9606.ENSP00000226299,9606.ENSP00000231487,9606.ENSP00000268058,9606.ENSP00000287156,9606.ENSP00000296161,9606.ENSP00000323889,9606.ENSP00000325677,9606.ENSP00000333266,9606.ENSP00000358327,9606.ENSP00000363993,9606.ENSP00000366819,9606.ENSP00000368699,9606.ENSP00000369213,9606.ENSP00000372155,9606.ENSP00000374455,9606.ENSP00000381167,9606.ENSP00000416561,9606.ENSP00000433138,9606.ENSP00000464087                                                                                                                                                                                                                                                                                                                                                                                                               | PRSS22,LAP3,SKP1,PML,UBE2L6,DTX3L,TRIM25,RNF40,UBA7,CASP7,PSMB9,UCHL3,ISG15,DDX58,PSME1,SQSTM1,DYNC2H1,CFB,CASP1,RNF213                                                                                                                         |

|            |                                                                                   |    |      |      |          |                                                                                                                                                                                                                                                                                                                                                                                                                                                                                                                                                                                                                                                                                                                                                                                                                                                                                                                                                                                                         |                                                                                                                                                                                                                                                                             |
|------------|-----------------------------------------------------------------------------------|----|------|------|----------|---------------------------------------------------------------------------------------------------------------------------------------------------------------------------------------------------------------------------------------------------------------------------------------------------------------------------------------------------------------------------------------------------------------------------------------------------------------------------------------------------------------------------------------------------------------------------------------------------------------------------------------------------------------------------------------------------------------------------------------------------------------------------------------------------------------------------------------------------------------------------------------------------------------------------------------------------------------------------------------------------------|-----------------------------------------------------------------------------------------------------------------------------------------------------------------------------------------------------------------------------------------------------------------------------|
| GO:1901564 | organonitrogen compound metabolic process                                         | 44 | 5281 | 0.31 | 4.11E-06 | 9606. ENSP00000161006,9606. ENSP00000225698,9606. ENSP00000226299,9606. ENSP00000229379,9606. ENSP00000231487,9606. ENSP00000233057,9606. ENSP00000244061,9606. ENSP00000249066,9606. ENSP00000264108,9606. ENSP00000268058,9606. ENSP00000287156,9606. ENSP00000296161,9606. ENSP00000296543,9606. ENSP00000296577,9606. ENSP00000306548,9606. ENSP00000317144,9606. ENSP00000323889,9606. ENSP00000325618,9606. ENSP00000325677,9606. ENSP00000333019,9606. ENSP00000333266,9606. ENSP00000347495,9606. ENSP00000355330,9606. ENSP00000358327,9606. ENSP00000363993,9606. ENSP00000366819,9606. ENSP00000368678,9606. ENSP00000368699,9606. ENSP00000369213,9606. ENSP00000372155,9606. ENSP00000374455,9606. ENSP00000378217,9606. ENSP00000379038,9606. ENSP00000379873,9606. ENSP00000381167,9606. ENSP00000404833,9606. ENSP00000416066,9606. ENSP00000416561,9606. ENSP00000428085,9606. ENSP00000433138,9606. ENSP00000452780,9606. ENSP00000463188,9606. ENSP00000464087,9606. ENSP00000464342 | PRSS22,C1QBP,LAP3,COX6A1,SKP1,EIF2AK2,RNF114,APOL2,HAT1,PML,UBE2L6,DTX3L,NAA15,ABCE1,MRPL13,PIBF1,TRIM25,PARP10,RNF40,ADSSL1,UBA7,WARS,TGM2,CASP7,PSMB9,UCLH3,AGRN,ISG15,DDX58,PSME1,SQSTM1,PRKCD,TYMP,HLA-A,DYNC2H1,TAPBP,SERPINA1,CFB,RPL30,CASP1,B2M,TRIM16,RNF213,RPL36 |
| GO:0031347 | regulation of defense response                                                    | 15 | 676  | 0.74 | 4.75E-06 | 9606. ENSP00000225698,9606. ENSP00000257604,9606. ENSP00000268058,9606. ENSP00000296161,9606. ENSP00000296577,9606. ENSP00000354394,9606. ENSP00000355330,9606. ENSP00000357459,9606. ENSP00000369213,9606. ENSP00000377344,9606. ENSP00000378217,9606. ENSP00000379873,9606. ENSP00000399168,9606. ENSP00000416561,9606. ENSP00000433138                                                                                                                                                                                                                                                                                                                                                                                                                                                                                                                                                                                                                                                               | C1QBP,TRAFD1,PML,DTX3L,ABCE1,STAT1,TGM2,ADAR,DDX58,DDX60,PRKCD,HLA-A,HLA-B,CFB,CASP1                                                                                                                                                                                        |
| GO:0002831 | regulation of response to biotic stimulus                                         | 12 | 426  | 0.84 | 8.73E-06 | 9606. ENSP00000225698,9606. ENSP00000257604,9606. ENSP00000268058,9606. ENSP00000296161,9606. ENSP00000296577,9606. ENSP00000354394,9606. ENSP00000357459,9606. ENSP00000369213,9606. ENSP00000377344,9606. ENSP00000378217,9606. ENSP00000379873,9606. ENSP00000399168                                                                                                                                                                                                                                                                                                                                                                                                                                                                                                                                                                                                                                                                                                                                 | C1QBP,TRAFD1,PML,DTX3L,ABCE1,STAT1,ADAR,DDX58,DDX60,PRKCD,HLA-A,HLA-B                                                                                                                                                                                                       |
| GO:0019885 | antigen processing and presentation of endogenous peptide antigen via MHC class I | 4  | 9    | 2.04 | 8.73E-06 | 9606. ENSP00000379873,9606. ENSP00000399168,9606. ENSP00000404833,9606. ENSP00000452780                                                                                                                                                                                                                                                                                                                                                                                                                                                                                                                                                                                                                                                                                                                                                                                                                                                                                                                 | HLA-A,HLA-B,TAPBP,B2M                                                                                                                                                                                                                                                       |
| GO:0071310 | cellular response to organic substance                                            | 26 | 2219 | 0.46 | 1.61E-05 | 9606. ENSP00000231487,9606. ENSP00000233057,9606. ENSP00000257570,9606. ENSP00000259206,9606. ENSP00000268058,9606. ENSP00000323889,9606. ENSP00000342278,9606. ENSP00000343023,9606. ENSP00000354394,9606. ENSP00000357459,9606. ENSP00000358327,9606. ENSP00000359490,9606. ENSP00000360883,9606. ENSP00000368678,9606. ENSP00000368699,9606. ENSP00000369213,9606. ENSP00000374455,9606. ENSP00000378217,9606. ENSP00000378786,9606. ENSP00000379873,9606. ENSP00000381601,9606. ENSP00000382707,9606. ENSP00000395590,9606. ENSP00000399168,9606. ENSP00000433138,9606. ENSP00000452780                                                                                                                                                                                                                                                                                                                                                                                                             | SKP1,EIF2AK2,OASL,IL1RN,PML,TRIM25,OAS2,SP100,STAT1,ADAR,CASP7,GBP4,IFIT3,AGRN,ISG15,DDX58,SQSTM1,PRKCD,HLA-DRA,HLA-A,MX1,IFITM3,IFI35,HLA-B,CASP1,B2M                                                                                                                      |

|            |                                           |    |      |      |          |                                                                                                                                                                                                                                                                                                                                                                                                                                                                                                                                                                                                                                                                                                                                                                                                                                                                                                                                                                                                                                                                                                                                                                                                                                    |                                                                                                                                                                                                                                                                                                                                    |
|------------|-------------------------------------------|----|------|------|----------|------------------------------------------------------------------------------------------------------------------------------------------------------------------------------------------------------------------------------------------------------------------------------------------------------------------------------------------------------------------------------------------------------------------------------------------------------------------------------------------------------------------------------------------------------------------------------------------------------------------------------------------------------------------------------------------------------------------------------------------------------------------------------------------------------------------------------------------------------------------------------------------------------------------------------------------------------------------------------------------------------------------------------------------------------------------------------------------------------------------------------------------------------------------------------------------------------------------------------------|------------------------------------------------------------------------------------------------------------------------------------------------------------------------------------------------------------------------------------------------------------------------------------------------------------------------------------|
| GO:0050896 | response to stimulus                      | 54 | 7824 | 0.23 | 1.62E-05 | 9606. ENSP00000225698,9606. ENSP00000231487,9606. ENSP00000233057,9606. ENSP00000249066,9606. ENSP00000253110,9606. ENSP00000257570,9606. ENSP00000257604,9606. ENSP00000259206,9606. ENSP00000262776,9606. ENSP00000264020,9606. ENSP00000264108,9606. ENSP00000268058,9606. ENSP00000287156,9606. ENSP00000296161,9606. ENSP00000323889,9606. ENSP00000325677,9606. ENSP0000033019,9606. ENSP00000333266,9606. ENSP00000334373,9606. ENSP00000342278,9606. ENSP00000343023,9606. ENSP00000354394,9606. ENSP00000355330,9606. ENSP00000357459,9606. ENSP00000358327,9606. ENSP00000359490,9606. ENSP00000359783,9606. ENSP00000359787,9606. ENSP00000360860,9606. ENSP00000360883,9606. ENSP00000368678,9606. ENSP00000368699,9606. ENSP00000369213,9606. ENSP00000371958,9606. ENSP00000374455,9606. ENSP00000377344,9606. ENSP00000377470,9606. ENSP00000378217,9606. ENSP00000378786,9606. ENSP00000379038,9606. ENSP00000379873,9606. ENSP00000381601,9606. ENSP00000382707,9606. ENSP00000395590,9606. ENSP00000399168,9606. ENSP00000404833,9606. ENSP00000416066,9606. ENSP00000416561,9606. ENSP00000428085,9606. ENSP00000430344,9606. ENSP00000433138,9606. ENSP00000452780,9606. ENSP00000463188,9606. ENSP00000478026 | C1QBP,SKP1,EIF2AK2,APOL2,C19orf66,OASL,TRAFD1,IL1RN,LGALS3BP,IFT46,HAT1,PML,UBE2L6,DTX3L,TRIM25,RNF40,ADSSL1,UBA7,KPNA4,OAS2,SP100,STAT1,TGM2,ADAR,CASP7,GBP4,IFI44,IFI44L,IFIT5,IFIT3,AGRN,ISG15,DDX58,CD9,SQSTM1,DDX60,CNP,PRKCD,HLA-DRA,TYMP,HLA-A,MX1,IFITM3,IFI35,HLA-B,TAPBP,SERPINA1,CFB,RPL30,PLCD1,CASP1,B2M,TRIM16,ANXA8 |
| GO:0048519 | negative regulation of biological process | 41 | 4953 | 0.31 | 1.90E-05 | 9606. ENSP00000225698,9606. ENSP00000231487,9606. ENSP00000233057,9606. ENSP00000253110,9606. ENSP00000257570,9606. ENSP00000257604,9606. ENSP00000259206,9606. ENSP00000264108,9606. ENSP00000268058,9606. ENSP00000287156,9606. ENSP00000296161,9606. ENSP00000296543,9606. ENSP00000296577,9606. ENSP00000317144,9606. ENSP00000319281,9606. ENSP00000323889,9606. ENSP00000325618,9606. ENSP00000325677,9606. ENSP00000333266,9606. ENSP00000343023,9606. ENSP00000347495,9606. ENSP00000354394,9606. ENSP00000357459,9606. ENSP00000360860,9606. ENSP00000360883,9606. ENSP00000368699,9606. ENSP00000369213,9606. ENSP00000371958,9606. ENSP00000374455,9606. ENSP00000378217,9606. ENSP00000379873,9606. ENSP00000381601,9606. ENSP00000382707,9606. ENSP00000396704,9606. ENSP00000399168,9606. ENSP00000416066,9606. ENSP00000428085,9606. ENSP00000452780,9606. ENSP00000464087,9606. ENSP00000464342,9606. ENSP00000478026                                                                                                                                                                                                                                                                                              | C1QBP,SKP1,EIF2AK2,C19orf66,OASL,TRAFD1,IL1RN,HAT1,PML,UBE2L6,DTX3L,NAA15,ABCE1,PIBF1,BASP1,TRIM25,PARP10,RNF40,UBA7,SP100,WARS,STAT1,ADAR,IFIT5,IFIT3,ISG15,DDX58,CD9,SQSTM1,PRKCD,HLA-A,MX1,IFITM3,TOP2B,HLA-B,SERPINA1,RPL30,B2M,RNF213,RPL36,ANXA8                                                                             |
| GO:0050688 | regulation of defense response to virus   | 6  | 71   | 1.32 | 2.93E-05 | 9606. ENSP00000225698,9606. ENSP00000268058,9606. ENSP00000296161,9606. ENSP00000354394,9606. ENSP00000369213,9606. ENSP00000377344                                                                                                                                                                                                                                                                                                                                                                                                                                                                                                                                                                                                                                                                                                                                                                                                                                                                                                                                                                                                                                                                                                | C1QBP,PML,DTX3L,STAT1,DDX58,DDX60                                                                                                                                                                                                                                                                                                  |

|            |                                                            |    |      |      |          |                                                                                                                                                                                                                                                                                                                                                                                                                                                                                                                                                                                                                                                                                                                                                                                    |                                                                                                                                                                                                                    |
|------------|------------------------------------------------------------|----|------|------|----------|------------------------------------------------------------------------------------------------------------------------------------------------------------------------------------------------------------------------------------------------------------------------------------------------------------------------------------------------------------------------------------------------------------------------------------------------------------------------------------------------------------------------------------------------------------------------------------------------------------------------------------------------------------------------------------------------------------------------------------------------------------------------------------|--------------------------------------------------------------------------------------------------------------------------------------------------------------------------------------------------------------------|
| GO:0042221 | response to chemical                                       | 36 | 4153 | 0.33 | 5.44E-05 | 9606.ENSP00000231487,9606.ENSP00000233057,9606.ENSP00000253110,9606.ENSP00000257570,9606.ENSP00000257604,9606.ENSP00000259206,9606.ENSP00000264108,9606.ENSP00000268058,9606.ENSP00000323889,9606.ENSP00000325677,9606.ENSP00000333019,9606.ENSP00000334373,9606.ENSP00000342278,9606.ENSP00000343023,9606.ENSP00000354394,9606.ENSP00000357459,9606.ENSP00000358327,9606.ENSP00000359490,9606.ENSP00000360883,9606.ENSP00000368678,9606.ENSP00000368699,9606.ENSP00000369213,9606.ENSP00000371958,9606.ENSP00000374455,9606.ENSP0000037470,9606.ENSP00000378217,9606.ENSP00000378786,9606.ENSP00000379038,9606.ENSP00000379873,9606.ENSP00000381601,9606.ENSP00000382707,9606.ENSP00000395590,9606.ENSP00000399168,9606.ENSP00000433138,9606.ENSP00000452780,9606.ENSP00000463188 | SKP1,EIF2AK2,C19orf66,OASL,TRAFD1,IL1RN,HAT1,PML,TRIM25,RNF40,ADSSL1,KPNA4,OAS2,SP100,STAT1,ADAR,CASP7,GBP4,IFIT3,AGRN,ISG15,DDX58,CD9,SQSTM1,CNP,PRKCD,HLA-DRA,TYMP,HLA-A,MX1,IFITM3,IFI35,HLA-B,CASP1,B2M,TRIM16 |
| GO:0032101 | regulation of response to external stimulus                | 16 | 955  | 0.62 | 5.49E-05 | 9606.ENSP00000225698,9606.ENSP00000257604,9606.ENSP00000268058,9606.ENSP00000296161,9606.ENSP00000296577,9606.ENSP00000354394,9606.ENSP00000355330,9606.ENSP00000357459,9606.ENSP00000369213,9606.ENSP00000371958,9606.ENSP00000377344,9606.ENSP00000378217,9606.ENSP00000379873,9606.ENSP0000039168,9606.ENSP00000416561,9606.ENSP00000433138                                                                                                                                                                                                                                                                                                                                                                                                                                     | C1QBP,TRAFD1,PML,DTX3L,ABCE1,STAT1,TGM2,ADAR,DDX58,CD9,DDX60,PRKCD,HLA-A,HLA-B,CFB,CASP1                                                                                                                           |
| GO:0032480 | negative regulation of type I interferon production        | 5  | 43   | 1.46 | 5.78E-05 | 9606.ENSP00000287156,9606.ENSP00000323889,9606.ENSP0000033266,9606.ENSP00000368699,9606.ENSP00000369213                                                                                                                                                                                                                                                                                                                                                                                                                                                                                                                                                                                                                                                                            | UBE2L6,TRIM25,UBA7,ISG15,DDX58                                                                                                                                                                                     |
| GO:0044265 | cellular macromolecule catabolic process                   | 15 | 842  | 0.64 | 5.78E-05 | 9606.ENSP00000231487,9606.ENSP00000268058,9606.ENSP00000287156,9606.ENSP00000296161,9606.ENSP00000323889,9606.ENSP00000325677,9606.ENSP00000333266,9606.ENSP00000342278,9606.ENSP00000363993,9606.ENSP00000366819,9606.ENSP00000368699,9606.ENSP00000374455,9606.ENSP00000428085,9606.ENSP00000464087,9606.ENSP00000464342                                                                                                                                                                                                                                                                                                                                                                                                                                                         | SKP1,PML,UBE2L6,DTX3L,TRIM25,RNF40,UBA7,OAS2,PSMB9,UCHL3,ISG15,SQSTM1,RPL30,RNF213,RPL36                                                                                                                           |
| GO:0009057 | macromolecule catabolic process                            | 16 | 970  | 0.61 | 6.33E-05 | 9606.ENSP00000231487,9606.ENSP00000268058,9606.ENSP00000287156,9606.ENSP00000296161,9606.ENSP00000323889,9606.ENSP00000325677,9606.ENSP00000333266,9606.ENSP00000342278,9606.ENSP00000363993,9606.ENSP00000366819,9606.ENSP00000368678,9606.ENSP00000368699,9606.ENSP00000374455,9606.ENSP00000428085,9606.ENSP00000464087,9606.ENSP00000464342                                                                                                                                                                                                                                                                                                                                                                                                                                    | SKP1,PML,UBE2L6,DTX3L,TRIM25,RNF40,UBA7,OAS2,PSMB9,UCHL3,AGRN,ISG15,SQSTM1,RPL30,RNF213,RPL36                                                                                                                      |
| GO:0051603 | proteolysis involved in cellular protein catabolic process | 12 | 532  | 0.75 | 6.75E-05 | 9606.ENSP00000231487,9606.ENSP00000268058,9606.ENSP00000287156,9606.ENSP00000296161,9606.ENSP00000323889,9606.ENSP00000325677,9606.ENSP00000333266,9606.ENSP00000363993,9606.ENSP00000366819,9606.ENSP00000368699,9606.ENSP00000374455,9606.ENSP00000464087                                                                                                                                                                                                                                                                                                                                                                                                                                                                                                                        | SKP1,PML,UBE2L6,DTX3L,TRIM25,RNF40,UBA7,PSMB9,UCHL3,ISG15,SQSTM1,RNF213                                                                                                                                            |
| GO:0045088 | regulation of innate immune response                       | 10 | 361  | 0.84 | 8.99E-05 | 9606.ENSP00000225698,9606.ENSP00000257604,9606.ENSP00000296577,9606.ENSP00000354394,9606.ENSP00000357459,9606.ENSP00000369213,9606.ENSP00000377344,9606.ENSP00000378217,9606.ENSP00000379873,9606.ENSP00000399168                                                                                                                                                                                                                                                                                                                                                                                                                                                                                                                                                                  | C1QBP,TRAFD1,ABCE1,STAT1,ADAR,DDX58,DDX60,PRKCD,HLA-A,HLA-B                                                                                                                                                        |
| GO:0002697 | regulation of immune effector process                      | 10 | 362  | 0.84 | 9.05E-05 | 9606.ENSP00000225698,9606.ENSP00000268058,9606.ENSP00000296161,9606.ENSP00000354394,9606.ENSP00000369213,9606.ENSP00000377344,9606.ENSP00000379873,9606.ENSP00000399168,9606.ENSP00000416561,9606.ENSP00000452780                                                                                                                                                                                                                                                                                                                                                                                                                                                                                                                                                                  | C1QBP,PML,DTX3L,STAT1,DDX58,DDX60,HLA-A,HLA-B,CFB,B2M                                                                                                                                                              |



|            |                                                                                                   |    |      |      |          |                                                                                                                                                                                                                                                                                                                                                                                                                                                                                                                                                                                       |                                                                                                                                                              |
|------------|---------------------------------------------------------------------------------------------------|----|------|------|----------|---------------------------------------------------------------------------------------------------------------------------------------------------------------------------------------------------------------------------------------------------------------------------------------------------------------------------------------------------------------------------------------------------------------------------------------------------------------------------------------------------------------------------------------------------------------------------------------|--------------------------------------------------------------------------------------------------------------------------------------------------------------|
| GO:0019941 | modification-dependent protein catabolic process                                                  | 11 | 467  | 0.77 | 1.20E-04 | 9606.ENSP00000231487,9606.ENSP00000268058,9606.ENSP00000287156,9606.ENSP00000296161,9606.ENSP00000323889,9606.ENSP00000325677,9606.ENSP00000333266,9606.ENSP00000366819,9606.ENSP00000368699,9606.ENSP00000374455,9606.ENSP00000464087                                                                                                                                                                                                                                                                                                                                                | SKP1,PML,UBE2L6,DTX3L,TRIM25,RNF40,UBA7,UCHL3,ISG15,SQSTM1,RNF213                                                                                            |
| GO:0035455 | response to interferon-alpha                                                                      | 4  | 22   | 1.65 | 1.20E-04 | 9606.ENSP00000233057,9606.ENSP00000357459,9606.ENSP00000360883,9606.ENSP00000382707                                                                                                                                                                                                                                                                                                                                                                                                                                                                                                   | EIF2AK2,ADAR,IFIT3,IFITM3                                                                                                                                    |
| GO:0070887 | cellular response to chemical stimulus                                                            | 27 | 2672 | 0.4  | 1.20E-04 | 9606.ENSP00000231487,9606.ENSP00000233057,9606.ENSP00000257570,9606.ENSP00000259206,9606.ENSP00000268058,9606.ENSP00000323889,9606.ENSP00000333019,9606.ENSP00000342278,9606.ENSP00000343023,9606.ENSP00000354394,9606.ENSP00000357459,9606.ENSP00000358327,9606.ENSP00000359490,9606.ENSP00000360883,9606.ENSP00000368678,9606.ENSP00000368699,9606.ENSP00000369213,9606.ENSP00000374455,9606.ENSP00000378217,9606.ENSP00000378786,9606.ENSP00000379873,9606.ENSP00000381601,9606.ENSP00000382707,9606.ENSP00000395590,9606.ENSP0000039168,9606.ENSP00000433138,9606.ENSP00000452780 | SKP1,EIF2AK2,OASL,IL1RN,PML,TRIM25,ADSSL1,OAS2,SP100,STAT1,ADAR,CASP7,GBP4,IFIT3,AGRN,ISG15,DX58,SQSTM1,PRKCD,HLA-DRA,HLA-A,MX1,IFITM3,IFI35,HLA-B,CASP1,B2M |
| GO:0002479 | antigen processing and presentation of exogenous peptide antigen via MHC class I, TAP-dependent   | 4  | 25   | 1.6  | 1.80E-04 | 9606.ENSP00000379873,9606.ENSP00000399168,9606.ENSP00000404833,9606.ENSP00000452780                                                                                                                                                                                                                                                                                                                                                                                                                                                                                                   | HLA-A,HLA-B,TAPBP,B2M                                                                                                                                        |
| GO:0032020 | ISG15-protein conjugation                                                                         | 3  | 6    | 2.09 | 1.80E-04 | 9606.ENSP00000287156,9606.ENSP00000333266,9606.ENSP00000368699                                                                                                                                                                                                                                                                                                                                                                                                                                                                                                                        | UBE2L6,UBA7,ISG15                                                                                                                                            |
| GO:0002230 | positive regulation of defense response to virus by host                                          | 4  | 26   | 1.58 | 2.10E-04 | 9606.ENSP00000268058,9606.ENSP00000296161,9606.ENSP00000354394,9606.ENSP00000369213                                                                                                                                                                                                                                                                                                                                                                                                                                                                                                   | PML,DTX3L,STAT1,DDX58                                                                                                                                        |
| GO:0001818 | negative regulation of cytokine production                                                        | 8  | 245  | 0.91 | 2.60E-04 | 9606.ENSP00000225698,9606.ENSP00000268058,9606.ENSP00000287156,9606.ENSP00000317144,9606.ENSP00000323889,9606.ENSP00000333266,9606.ENSP00000368699,9606.ENSP00000369213                                                                                                                                                                                                                                                                                                                                                                                                               | C1QBP,PML,UBE2L6,PIBF1,TRIM25,UBA7,ISG15,DDX58                                                                                                               |
| GO:0032479 | regulation of type I interferon production                                                        | 6  | 112  | 1.12 | 2.60E-04 | 9606.ENSP00000287156,9606.ENSP00000323889,9606.ENSP0000033266,9606.ENSP00000354394,9606.ENSP00000368699,9606.ENSP00000369213                                                                                                                                                                                                                                                                                                                                                                                                                                                          | UBE2L6,TRIM25,UBA7,STAT1,ISG15,DDX58                                                                                                                         |
| GO:0002682 | regulation of immune system process                                                               | 18 | 1391 | 0.51 | 2.90E-04 | 9606.ENSP00000225698,9606.ENSP00000233057,9606.ENSP00000257604,9606.ENSP00000268058,9606.ENSP00000296161,9606.ENSP00000296577,9606.ENSP00000317144,9606.ENSP00000354394,9606.ENSP00000357459,9606.ENSP00000368699,9606.ENSP00000369213,9606.ENSP00000377344,9606.ENSP00000378217,9606.ENSP00000378786,9606.ENSP00000379873,9606.ENSP00000399168,9606.ENSP00000416561,9606.ENSP00000452780                                                                                                                                                                                             | C1QBP,EIF2AK2,TRAFD1,PML,DTX3L,ABCE1,PIBF1,STAT1,ADAR,ISG15,DDX58,DDX60,PRKCD,HLA-DRA,HLA-A,HLA-B,CFB,B2M                                                    |
| GO:0002480 | antigen processing and presentation of exogenous peptide antigen via MHC class I, TAP-independent | 3  | 8    | 1.97 | 3.10E-04 | 9606.ENSP00000379873,9606.ENSP00000399168,9606.ENSP00000452780                                                                                                                                                                                                                                                                                                                                                                                                                                                                                                                        | HLA-A,HLA-B,B2M                                                                                                                                              |

|            |                                     |    |      |      |          |                                                                                                                                                                                                                                                                                                                                                                                                                                                                                                                                                                                                                                                                                                                                                                                                                                                                                                                                                                                                                                                                                                                                                                                                                                                                                        |                                                                                                                                                                                                                                                                                                                                                         |
|------------|-------------------------------------|----|------|------|----------|----------------------------------------------------------------------------------------------------------------------------------------------------------------------------------------------------------------------------------------------------------------------------------------------------------------------------------------------------------------------------------------------------------------------------------------------------------------------------------------------------------------------------------------------------------------------------------------------------------------------------------------------------------------------------------------------------------------------------------------------------------------------------------------------------------------------------------------------------------------------------------------------------------------------------------------------------------------------------------------------------------------------------------------------------------------------------------------------------------------------------------------------------------------------------------------------------------------------------------------------------------------------------------------|---------------------------------------------------------------------------------------------------------------------------------------------------------------------------------------------------------------------------------------------------------------------------------------------------------------------------------------------------------|
| GO:0006807 | nitrogen compound metabolic process | 53 | 8349 | 0.2  | 3.30E-04 | <p>9606. ENSP00000161006,9606. ENSP00000225698,9606. ENSP00000226299,9606. ENSP00000229379,9606. ENSP00000231487,9606. ENSP00000233057,9606. ENSP00000244061,9606. ENSP00000249066,9606. ENSP00000264108,9606. ENSP00000268058,9606. ENSP00000287156,9606. ENSP00000296161,9606. ENSP00000296543,9606. ENSP00000296577,9606. ENSP00000306548,9606. ENSP00000317144,9606. ENSP00000323889,9606. ENSP00000325618,9606. ENSP00000325677,9606. ENSP00000333019,9606. ENSP00000333266,9606. ENSP00000342278,9606. ENSP00000343023,9606. ENSP00000347495,9606. ENSP00000354394,9606. ENSP00000355330,9606. ENSP00000357459,9606. ENSP00000358327,9606. ENSP00000363993,9606. ENSP00000365950,9606. ENSP00000366819,9606. ENSP00000368678,9606. ENSP00000368699,9606. ENSP00000369213,9606. ENSP00000369965,9606. ENSP00000372155,9606. ENSP00000374455,9606. ENSP00000377470,9606. ENSP00000378217,9606. ENSP00000379038,9606. ENSP00000379873,9606. ENSP00000381167,9606. ENSP00000396704,9606. ENSP00000400591,9606. ENSP00000404833,9606. ENSP00000416066,9606. ENSP00000416561,9606. ENSP00000428085,9606. ENSP00000433138,9606. ENSP00000452780,9606. ENSP00000463188,9606. ENSP00000464087,9606. ENSP00000464342</p>                                                                   | <p>PRSS22,C1QBP,LAP3,COX6A1,SKP1,EIF2AK2,RNF114,A<br/>POL2,HAT1,PML,UBE2L6,DTX3L,NAA15,ABCE1,MRPL13,PIBF1,TRIM25,PARP10,RNF40,ADSSL1,UBA7,OAS2,SP100,WARS,STAT1,TGM2,ADAR,CASP7,PSMB9,RBM3,UCHL3,AGRN,ISG15,DDX58,BTF3,PSME1,SQSTM1,CNP,PRKCD,TYMP,HLA-A,DYNC2H1,TOP2B,SNRPE,TAPBP,SERPINA1,CFB,RPL30,CASP1,B2M,TRIM16,RNF213,RPL36</p>                 |
| GO:0071704 | organic substance metabolic process | 56 | 9135 | 0.18 | 3.60E-04 | <p>9606. ENSP00000161006,9606. ENSP00000225698,9606. ENSP00000226299,9606. ENSP00000229379,9606. ENSP00000231487,9606. ENSP00000233057,9606. ENSP00000244061,9606. ENSP00000249066,9606. ENSP00000259206,9606. ENSP00000264108,9606. ENSP00000268058,9606. ENSP00000287156,9606. ENSP00000296161,9606. ENSP00000296543,9606. ENSP00000296577,9606. ENSP00000306548,9606. ENSP00000317144,9606. ENSP00000323889,9606. ENSP00000325618,9606. ENSP00000325677,9606. ENSP00000333019,9606. ENSP00000333266,9606. ENSP00000342278,9606. ENSP00000343023,9606. ENSP00000347495,9606. ENSP00000354394,9606. ENSP00000355330,9606. ENSP00000357459,9606. ENSP00000358327,9606. ENSP00000363993,9606. ENSP00000365950,9606. ENSP00000366819,9606. ENSP00000368678,9606. ENSP00000368699,9606. ENSP00000369213,9606. ENSP00000369965,9606. ENSP00000371958,9606. ENSP00000372155,9606. ENSP00000374455,9606. ENSP00000377470,9606. ENSP00000378217,9606. ENSP00000379038,9606. ENSP00000379873,9606. ENSP00000381167,9606. ENSP00000396704,9606. ENSP00000400591,9606. ENSP00000404833,9606. ENSP00000416066,9606. ENSP00000416561,9606. ENSP00000428085,9606. ENSP00000430344,9606. ENSP00000433138,9606. ENSP00000452780,9606. ENSP00000463188,9606. ENSP00000464087,9606. ENSP00000464342</p> | <p>PRSS22,C1QBP,LAP3,COX6A1,SKP1,EIF2AK2,RNF114,A<br/>POL2,IL1RN,HAT1,PML,UBE2L6,DTX3L,NAA15,ABCE1,MRPL13,PIBF1,TRIM25,PARP10,RNF40,ADSSL1,UBA7,OAS2,SP100,WARS,STAT1,TGM2,ADAR,CASP7,PSMB9,RBM3,UCHL3,AGRN,ISG15,DDX58,BTF3,CD9,PSME1,SQSTM1,CNP,PRKCD,TYMP,HLA-A,DYNC2H1,TOP2B,SNRPE,TAPBP,SERPINA1,CFB,RPL30,PLCD1,CASP1,B2M,TRIM16,RNF213,RPL36</p> |

|            |                                         |    |      |      |          |                                                                                                                                                                                                                                                                                                                                                                                                                                                                                                                                                                                                                                                                                                                                                                                                                                                                                                                                                                                                                            |                                                                                                                                                                                                                                                                                                    |
|------------|-----------------------------------------|----|------|------|----------|----------------------------------------------------------------------------------------------------------------------------------------------------------------------------------------------------------------------------------------------------------------------------------------------------------------------------------------------------------------------------------------------------------------------------------------------------------------------------------------------------------------------------------------------------------------------------------------------------------------------------------------------------------------------------------------------------------------------------------------------------------------------------------------------------------------------------------------------------------------------------------------------------------------------------------------------------------------------------------------------------------------------------|----------------------------------------------------------------------------------------------------------------------------------------------------------------------------------------------------------------------------------------------------------------------------------------------------|
| GO:0044267 | cellular protein metabolic process      | 31 | 3603 | 0.33 | 3.80E-04 | 9606.ENSP00000231487,9606.ENSP00000233057,9606.ENSP0000024061,9606.ENSP00000264108,9606.ENSP00000268058,9606.ENSP00000287156,9606.ENSP00000296161,9606.ENSP00000296543,9606.ENSP00000296577,9606.ENSP00000306548,9606.ENSP00000317144,9606.ENSP00000323889,9606.ENSP00000325618,9606.ENSP00000325677,9606.ENSP00000332666,9606.ENSP00000347495,9606.ENSP00000355330,9606.ENSP00000363993,9606.ENSP00000366819,9606.ENSP00000368699,9606.ENSP00000369213,9606.ENSP00000372155,9606.ENSP00000374455,9606.ENSP00000378217,9606.ENSP00000379873,9606.ENSP00000416066,9606.ENSP00000428085,9606.ENSP00000452780,9606.ENSP00000463188,9606.ENSP00000464087,9606.ENSP00000464342                                                                                                                                                                                                                                                                                                                                                  | SKP1,EIF2AK2,RNF114,HAT1,PML,UBE2L6,DTX3L,NAA15,ABCE1,MRPL13,PIBF1,TRIM25,PARP10,RNF40,UBA7,WARS,TGM2,PSMB9,UCHL3,ISG15,DDX58,PSME1,SQSTM1,PRKCD,HLA-A,SERPINA1,RPL30,B2M,TRIM16,RNF213,RPL36                                                                                                      |
| GO:0007166 | cell surface receptor signaling pathway | 23 | 2198 | 0.41 | 3.90E-04 | 9606.ENSP00000231487,9606.ENSP00000257570,9606.ENSP00000259206,9606.ENSP00000264020,9606.ENSP00000268058,9606.ENSP00000323889,9606.ENSP00000342278,9606.ENSP00000343023,9606.ENSP00000354394,9606.ENSP00000357459,9606.ENSP00000360883,9606.ENSP00000368699,9606.ENSP00000371958,9606.ENSP00000374455,9606.ENSP00000378217,9606.ENSP00000378786,9606.ENSP00000379873,9606.ENSP00000381601,9606.ENSP00000382707,9606.ENSP00000395590,9606.ENSP00000399168,9606.ENSP00000433138,9606.ENSP00000452780                                                                                                                                                                                                                                                                                                                                                                                                                                                                                                                         | SKP1,OASL,IL1RN,IFT46,PML,TRIM25,OAS2,SP100,STAT1,ADAR,IFIT3,ISG15,CD9,SQSTM1,PRKCD,HLA-DRA,HLA-A,MX1,IFITM3,IFI35,HLA-B,CASP1,B2M                                                                                                                                                                 |
| GO:0043170 | macromolecule metabolic process         | 49 | 7453 | 0.21 | 4.20E-04 | 9606.ENSP00000161006,9606.ENSP00000225698,9606.ENSP00000226299,9606.ENSP00000231487,9606.ENSP00000233057,9606.ENSP00000244061,9606.ENSP00000249066,9606.ENSP00000264108,9606.ENSP00000268058,9606.ENSP00000287156,9606.ENSP00000296161,9606.ENSP00000296543,9606.ENSP00000296577,9606.ENSP00000306548,9606.ENSP00000317144,9606.ENSP00000323889,9606.ENSP00000325618,9606.ENSP00000325677,9606.ENSP00000332666,9606.ENSP00000342278,9606.ENSP00000343023,9606.ENSP00000347495,9606.ENSP00000354394,9606.ENSP00000355330,9606.ENSP00000357459,9606.ENSP00000358327,9606.ENSP00000363993,9606.ENSP00000366819,9606.ENSP00000368699,9606.ENSP00000369213,9606.ENSP00000369965,9606.ENSP00000371958,9606.ENSP00000372155,9606.ENSP00000374455,9606.ENSP00000378217,9606.ENSP00000379873,9606.ENSP00000381167,9606.ENSP00000396704,9606.ENSP00000400591,9606.ENSP00000416066,9606.ENSP00000416561,9606.ENSP00000428085,9606.ENSP00000433138,9606.ENSP00000452780,9606.ENSP00000463188,9606.ENSP00000464087,9606.ENSP00000464342 | PRSS22,C1QBP,LAP3,SKP1,EIF2AK2,RNF114,APOL2,HAT1,PML,UBE2L6,DTX3L,NAA15,ABCE1,MRPL13,PIBF1,TRIM25,PARP10,RNF40,UBA7,OAS2,SP100,WARS,STAT1,TGM2,ADAR,CASP7,PSMB9,RBM3,UCHL3,AGRN,ISG15,DDX58,BTF3,CD9,PSME1,SQSTM1,PRKCD,HLA-A,DYNC2H1,TOP2B,SNRPE,SERPINA1,CFB,RPL30,CASP1,B2M,TRIM16,RNF213,RPL36 |
| GO:0080134 | regulation of response to stress        | 17 | 1299 | 0.51 | 4.20E-04 | 9606.ENSP00000225698,9606.ENSP00000233057,9606.ENSP00000257604,9606.ENSP00000268058,9606.ENSP00000296161,9606.ENSP00000296577,9606.ENSP00000354394,9606.ENSP00000355330,9606.ENSP00000357459,9606.ENSP00000369213,9606.ENSP00000371958,9606.ENSP00000377344,9606.ENSP00000378217,9606.ENSP00000379873,9606.ENSP00000399168,9606.ENSP00000416561,9606.ENSP00000433138                                                                                                                                                                                                                                                                                                                                                                                                                                                                                                                                                                                                                                                       | C1QBP,EIF2AK2,TRAFD1,PML,DTX3L,ABCE1,STAT1,TGM2,ADAR,DDX58,CD9,DDX60,PRKCD,HLA-A,HLA-B,CFB,CASP1                                                                                                                                                                                                   |

|            |                                                          |    |      |      |          |                                                                                                                                                                                                                                                                                                                                                                                                                                                                                                                                                                                                                                                                                                                                                                                                                                                                                                                                                                                                                                                                                                                                                                              |                                                                                                                                                                                                                                                                                                                                   |
|------------|----------------------------------------------------------|----|------|------|----------|------------------------------------------------------------------------------------------------------------------------------------------------------------------------------------------------------------------------------------------------------------------------------------------------------------------------------------------------------------------------------------------------------------------------------------------------------------------------------------------------------------------------------------------------------------------------------------------------------------------------------------------------------------------------------------------------------------------------------------------------------------------------------------------------------------------------------------------------------------------------------------------------------------------------------------------------------------------------------------------------------------------------------------------------------------------------------------------------------------------------------------------------------------------------------|-----------------------------------------------------------------------------------------------------------------------------------------------------------------------------------------------------------------------------------------------------------------------------------------------------------------------------------|
| GO:0019884 | antigen processing and presentation of exogenous antigen | 6  | 130  | 1.06 | 5.00E-04 | 9606.ENSP00000372155,9606.ENSP00000378786,9606.ENSP00000379873,9606.ENSP00000399168,9606.ENSP00000404833,9606.ENSP00000452780                                                                                                                                                                                                                                                                                                                                                                                                                                                                                                                                                                                                                                                                                                                                                                                                                                                                                                                                                                                                                                                | PSME1,HLA-DRA,HLA-A,HLA-B,TAPBP,B2M                                                                                                                                                                                                                                                                                               |
| GO:1901575 | organic substance catabolic process                      | 19 | 1609 | 0.47 | 5.00E-04 | 9606.ENSP00000231487,9606.ENSP00000268058,9606.ENSP00000287156,9606.ENSP00000296161,9606.ENSP00000323889,9606.ENSP00000325677,9606.ENSP00000333266,9606.ENSP00000342278,9606.ENSP00000363993,9606.ENSP00000366819,9606.ENSP00000368678,9606.ENSP00000368699,9606.ENSP00000374455,9606.ENSP0000037470,9606.ENSP00000379038,9606.ENSP00000428085,9606.ENSP00000430344,9606.ENSP00000464087,9606.ENSP00000464342                                                                                                                                                                                                                                                                                                                                                                                                                                                                                                                                                                                                                                                                                                                                                                | SKP1,PML,UBE2L6,DTX3L,TRIM25,RNF40,UBA7,OAS2,PSMB9,UCHL3,AGRN,ISG15,SQSTM1,CNP,TYMP,RPL30,PLCD1,RNF213,RPL36                                                                                                                                                                                                                      |
| GO:0044238 | primary metabolic process                                | 54 | 8808 | 0.18 | 6.80E-04 | 9606.ENSP00000161006,9606.ENSP00000225698,9606.ENSP00000226299,9606.ENSP00000229379,9606.ENSP00000231487,9606.ENSP00000233057,9606.ENSP00000244061,9606.ENSP00000249066,9606.ENSP00000259206,9606.ENSP00000264108,9606.ENSP00000268058,9606.ENSP00000287156,9606.ENSP00000296161,9606.ENSP00000296543,9606.ENSP00000296577,9606.ENSP00000306548,9606.ENSP00000317144,9606.ENSP00000323889,9606.ENSP00000325618,9606.ENSP00000325677,9606.ENSP00000333019,9606.ENSP00000333266,9606.ENSP00000342278,9606.ENSP00000343023,9606.ENSP00000347495,9606.ENSP00000354394,9606.ENSP00000355330,9606.ENSP00000357459,9606.ENSP00000358327,9606.ENSP00000363993,9606.ENSP00000365950,9606.ENSP00000366819,9606.ENSP00000368678,9606.ENSP00000368699,9606.ENSP00000369213,9606.ENSP0000036965,9606.ENSP00000372155,9606.ENSP00000374455,9606.ENSP00000377470,9606.ENSP00000378217,9606.ENSP00000379038,9606.ENSP00000379873,9606.ENSP00000381167,9606.ENSP00000396704,9606.ENSP00000400591,9606.ENSP00000416066,9606.ENSP00000416561,9606.ENSP00000428085,9606.ENSP00000430344,9606.ENSP00000433138,9606.ENSP00000452780,9606.ENSP00000463188,9606.ENSP00000464087,9606.ENSP00000464342 | PRSS22,C1QBP,LAP3,COX6A1,SKP1,EIF2AK2,RNF114,APOL2,IL1RN,HAT1,PML,UBE2L6,DTX3L,NAA15,ABCE1,MRPL13,PIBF1,TRIM25,PARP10,RNF40,ADSSL1,UBA7,OAS2,SP100,WARS,STAT1,TGM2,ADAR,CASP7,PSMB9,RBM3,UCHL3,AGRN,ISG15,DDX58,BTF3,PSME1,SQSTM1,CNP,PRKCD,TYMP,HLA-A,DYNC2H1,TOP2B,SNRPE,SERPINA1,CFB,RPL30,PLCD1,CASP1,B2M,TRIM16,RNF213,RPL36 |
| GO:1901565 | organonitrogen compound catabolic process                | 14 | 958  | 0.56 | 7.80E-04 | 9606.ENSP00000231487,9606.ENSP00000268058,9606.ENSP00000287156,9606.ENSP00000296161,9606.ENSP00000323889,9606.ENSP00000325677,9606.ENSP00000333266,9606.ENSP00000363993,9606.ENSP00000366819,9606.ENSP00000368678,9606.ENSP00000368699,9606.ENSP00000374455,9606.ENSP00000379038,9606.ENSP00000464087                                                                                                                                                                                                                                                                                                                                                                                                                                                                                                                                                                                                                                                                                                                                                                                                                                                                        | SKP1,PML,UBE2L6,DTX3L,TRIM25,RNF40,UBA7,PSMB9,UCHL3,AGRN,ISG15,SQSTM1,TYMP,RNF213                                                                                                                                                                                                                                                 |
| GO:0001819 | positive regulation of cytokine production               | 9  | 390  | 0.76 | 8.20E-04 | 9606.ENSP00000233057,9606.ENSP00000317144,9606.ENSP00000354394,9606.ENSP00000369213,9606.ENSP00000377344,9606.ENSP00000379873,9606.ENSP00000433138,9606.ENSP00000452780,9606.ENSP00000463188                                                                                                                                                                                                                                                                                                                                                                                                                                                                                                                                                                                                                                                                                                                                                                                                                                                                                                                                                                                 | EIF2AK2,PIBF1,STAT1,DDX58,DDX60,HLA-A,CASP1,B2M,TRIM16                                                                                                                                                                                                                                                                            |
| GO:0002832 | negative regulation of response to biotic stimulus       | 5  | 85   | 1.16 | 8.20E-04 | 9606.ENSP00000225698,9606.ENSP00000257604,9606.ENSP00000357459,9606.ENSP00000379873,9606.ENSP00000399168                                                                                                                                                                                                                                                                                                                                                                                                                                                                                                                                                                                                                                                                                                                                                                                                                                                                                                                                                                                                                                                                     | C1QBP,TRAFD1,ADAR,HLA-A,HLA-B                                                                                                                                                                                                                                                                                                     |

|            |                                                              |    |      |      |          |                                                                                                                                                                                                                                                                                                                                                                                                                                                                                                                                              |                                                                                                                                                 |
|------------|--------------------------------------------------------------|----|------|------|----------|----------------------------------------------------------------------------------------------------------------------------------------------------------------------------------------------------------------------------------------------------------------------------------------------------------------------------------------------------------------------------------------------------------------------------------------------------------------------------------------------------------------------------------------------|-------------------------------------------------------------------------------------------------------------------------------------------------|
| GO:0050776 | regulation of immune response                                | 13 | 873  | 0.57 | 1.20E-03 | 9606.ENSP00000225698,9606.ENSP00000257604,9606.ENSP00000296577,9606.ENSP00000354394,9606.ENSP00000357459,9606.ENSP0000369213,9606.ENSP00000377344,9606.ENSP00000378217,9606.ENSP00000378786,9606.ENSP00000379873,9606.ENSP00000399168,9606.ENSP00000416561,9606.ENSP00000452780                                                                                                                                                                                                                                                              | C1QBP,TRAFD1,ABCE1,STAT1,ADAR,DDX58,DDX60,PRKCD,HLA-DRA,HLA-A,HLA-B,CFB,B2M                                                                     |
| GO:0045824 | negative regulation of innate immune response                | 4  | 49   | 1.31 | 1.50E-03 | 9606.ENSP00000257604,9606.ENSP00000357459,9606.ENSP00000379873,9606.ENSP00000399168                                                                                                                                                                                                                                                                                                                                                                                                                                                          | TRAFD1,ADAR,HLA-A,HLA-B                                                                                                                         |
| GO:0060759 | regulation of response to cytokine stimulus                  | 6  | 162  | 0.96 | 1.50E-03 | 9606.ENSP00000259206,9606.ENSP00000296577,9606.ENSP00000354394,9606.ENSP00000357459,9606.ENSP00000369213,9606.ENSP00000433138                                                                                                                                                                                                                                                                                                                                                                                                                | IL1RN,ABCE1,STAT1,ADAR,DDX58,CASP1                                                                                                              |
| GO:0001916 | positive regulation of T cell mediated cytotoxicity          | 3  | 17   | 1.64 | 1.60E-03 | 9606.ENSP00000379873,9606.ENSP00000399168,9606.ENSP00000452780                                                                                                                                                                                                                                                                                                                                                                                                                                                                               | HLA-A,HLA-B,B2M                                                                                                                                 |
| GO:0043122 | regulation of I-kappaB kinase/NF-kappaB signaling            | 6  | 167  | 0.95 | 1.60E-03 | 9606.ENSP00000323889,9606.ENSP00000354394,9606.ENSP0000035330,9606.ENSP00000360860,9606.ENSP00000374455,9606.ENSP00000433138                                                                                                                                                                                                                                                                                                                                                                                                                 | TRIM25,STAT1,TGM2,IFIT5,SQSTM1,CASP1                                                                                                            |
| GO:0051239 | regulation of multicellular organismal process               | 25 | 2788 | 0.35 | 1.60E-03 | 9606.ENSP00000225698,9606.ENSP00000233057,9606.ENSP00000259206,9606.ENSP00000268058,9606.ENSP00000287156,9606.ENSP00000317144,9606.ENSP00000319281,9606.ENSP00000323889,9606.ENSP00000333266,9606.ENSP00000342278,9606.ENSP00000343023,9606.ENSP00000347495,9606.ENSP00000354394,9606.ENSP00000368678,9606.ENSP00000368699,9606.ENSP00000369213,9606.ENSP00000371958,9606.ENSP00000377344,9606.ENSP00000378217,9606.ENSP00000379038,9606.ENSP00000379873,9606.ENSP00000399168,9606.ENSP00000433138,9606.ENSP00000452780,9606.ENSP00000463188 | C1QBP,EIF2AK2,IL1RN,PML,UBE2L6,PIBF1,BASP1,TRIM25,UBA7,OAS2,SP100,WARS,STAT1,AGRN,ISG15,DDX58,CD9,DDX60,PRKCD,TYMP,HLA-A,HLA-B,CASP1,B2M,TRIM16 |
| GO:0009617 | response to bacterium                                        | 10 | 555  | 0.65 | 2.00E-03 | 9606.ENSP00000342278,9606.ENSP00000359783,9606.ENSP00000368699,9606.ENSP00000377470,9606.ENSP00000378217,9606.ENSP00000379873,9606.ENSP00000399168,9606.ENSP00000428085,9606.ENSP00000433138,9606.ENSP00000452780                                                                                                                                                                                                                                                                                                                            | OAS2,IFI44,ISG15,CNP,PRKCD,HLA-A,HLA-B,RPL30,CASP1,B2M                                                                                          |
| GO:0031348 | negative regulation of defense response                      | 6  | 180  | 0.92 | 2.40E-03 | 9606.ENSP00000225698,9606.ENSP00000257604,9606.ENSP00000357459,9606.ENSP00000378217,9606.ENSP00000379873,9606.ENSP00000399168                                                                                                                                                                                                                                                                                                                                                                                                                | C1QBP,TRAFD1,ADAR,PRKCD,HLA-A,HLA-B                                                                                                             |
| GO:0070647 | protein modification by small protein conjugation or removal | 13 | 945  | 0.53 | 2.40E-03 | 9606.ENSP00000231487,9606.ENSP00000244061,9606.ENSP00000287156,9606.ENSP00000296161,9606.ENSP00000323889,9606.ENSP00000325677,9606.ENSP00000333266,9606.ENSP00000363993,9606.ENSP00000366819,9606.ENSP00000369213,9606.ENSP00000372155,9606.ENSP00000379873,9606.ENSP00000464087                                                                                                                                                                                                                                                             | SKP1,RNF114,UBE2L6,DTX3L,TRIM25,RNF40,UBA7,PSMB9,UCHL3,DDX58,PSME1,HLA-A,RNF213                                                                 |
| GO:0006511 | ubiquitin-dependent protein catabolic process                | 9  | 461  | 0.68 | 2.50E-03 | 9606.ENSP00000231487,9606.ENSP00000268058,9606.ENSP00000296161,9606.ENSP00000323889,9606.ENSP00000325677,9606.ENSP00000333266,9606.ENSP00000366819,9606.ENSP00000374455,9606.ENSP00000464087                                                                                                                                                                                                                                                                                                                                                 | SKP1,PML,DTX3L,TRIM25,RNF40,UBA7,UCHL3,SQSTM1,RNF213                                                                                            |

|            |                                                                                                                   |    |       |      |          |                                                                                                                                                                                                                                                                                                                                                                                                                                                                                                                                                                                                                                                                                                                                                                                                                                                                                                                                                                                                                                                                                                                                                                                                                                                                                                                                 |                                                                                                                                                                                                                                                                                                                                                                                    |
|------------|-------------------------------------------------------------------------------------------------------------------|----|-------|------|----------|---------------------------------------------------------------------------------------------------------------------------------------------------------------------------------------------------------------------------------------------------------------------------------------------------------------------------------------------------------------------------------------------------------------------------------------------------------------------------------------------------------------------------------------------------------------------------------------------------------------------------------------------------------------------------------------------------------------------------------------------------------------------------------------------------------------------------------------------------------------------------------------------------------------------------------------------------------------------------------------------------------------------------------------------------------------------------------------------------------------------------------------------------------------------------------------------------------------------------------------------------------------------------------------------------------------------------------|------------------------------------------------------------------------------------------------------------------------------------------------------------------------------------------------------------------------------------------------------------------------------------------------------------------------------------------------------------------------------------|
| GO:0050789 | regulation of biological process                                                                                  | 61 | 11116 | 0.13 | 2.80E-03 | 9606.ENSP00000225698,9606.ENSP00000231487,9606.ENSP00000233057,9606.ENSP00000244061,9606.ENSP00000253110,9606.ENSP00000257570,9606.ENSP00000257604,9606.ENSP00000259206,9606.ENSP00000262776,9606.ENSP00000264020,9606.ENSP00000264108,9606.ENSP00000268058,9606.ENSP00000287156,9606.ENSP00000296161,9606.ENSP00000296543,9606.ENSP00000296577,9606.ENSP00000317144,9606.ENSP00000319281,9606.ENSP00000323889,9606.ENSP00000325618,9606.ENSP00000325677,9606.ENSP00000333266,9606.ENSP00000342278,9606.ENSP00000343023,9606.ENSP00000347495,9606.ENSP00000354394,9606.ENSP00000355330,9606.ENSP00000357459,9606.ENSP00000360860,9606.ENSP00000360883,9606.ENSP00000363993,9606.ENSP00000365950,9606.ENSP00000368678,9606.ENSP00000368699,9606.ENSP00000369213,9606.ENSP00000369965,9606.ENSP00000371958,9606.ENSP00000372155,9606.ENSP00000374455,9606.ENSP00000377344,9606.ENSP00000378217,9606.ENSP00000378786,9606.ENSP00000379038,9606.ENSP00000379873,9606.ENSP00000381167,9606.ENSP00000381601,9606.ENSP00000382707,9606.ENSP00000395590,9606.ENSP00000396704,9606.ENSP00000399168,9606.ENSP00000404833,9606.ENSP00000416066,9606.ENSP00000416561,9606.ENSP00000428085,9606.ENSP00000430344,9606.ENSP00000433138,9606.ENSP00000452780,9606.ENSP00000463188,9606.ENSP00000464087,9606.ENSP00000464342,9606.ENSP0000478026 | C1QBP,SKP1,EIF2AK2,RNF114,C19orf66,OASL,TRAFD1,IL1RN,LGALS3BP,IFT46,HAT1,PML,UBE2L6,DTX3L,NA A15,ABCE1,PIBF1,BASP1,TRIM25,PARP10,RNF40,UBA 7,OAS2,SP100,WARS,STAT1,TGM2,ADAR,IFIT5,IFIT3,PSMB9,RBM3,AGRN,ISG15,DDX58,BTF3,CD9,PSME1,SQ STM1,DDX60,PRKCD,HLA-DRA,TYMP,HLA-A,DYNC2H1,MX1,IFITM3,IFI35,TOP2B,HLA-B,TAPBP,SERPINA1,CFB,RPL30,PLCD1,CASP1,B2M,TRIM16,RNF213,RPL36,ANXA8 |
| GO:0006513 | protein monoubiquitination                                                                                        | 4  | 61    | 1.21 | 2.90E-03 | 9606.ENSP00000231487,9606.ENSP00000296161,9606.ENSP00000323889,9606.ENSP00000325677                                                                                                                                                                                                                                                                                                                                                                                                                                                                                                                                                                                                                                                                                                                                                                                                                                                                                                                                                                                                                                                                                                                                                                                                                                             | SKP1,DTX3L,TRIM25,RNF40                                                                                                                                                                                                                                                                                                                                                            |
| GO:0051457 | maintenance of protein location in nucleus                                                                        | 3  | 22    | 1.53 | 2.90E-03 | 9606.ENSP00000231487,9606.ENSP00000268058,9606.ENSP00000343023                                                                                                                                                                                                                                                                                                                                                                                                                                                                                                                                                                                                                                                                                                                                                                                                                                                                                                                                                                                                                                                                                                                                                                                                                                                                  | SKP1,PML,SP100                                                                                                                                                                                                                                                                                                                                                                     |
| GO:0002478 | antigen processing and presentation of exogenous peptide antigen                                                  | 5  | 123   | 1    | 3.40E-03 | 9606.ENSP00000378786,9606.ENSP00000379873,9606.ENSP00000399168,9606.ENSP00000404833,9606.ENSP00000452780                                                                                                                                                                                                                                                                                                                                                                                                                                                                                                                                                                                                                                                                                                                                                                                                                                                                                                                                                                                                                                                                                                                                                                                                                        | HLA-DRA,HLA-A,HLA-B,TAPBP,B2M                                                                                                                                                                                                                                                                                                                                                      |
| GO:0002486 | antigen processing and presentation of endogenous peptide antigen via MHC class I via ER pathway, TAP-independent | 2  | 3     | 2.22 | 3.40E-03 | 9606.ENSP00000379873,9606.ENSP00000399168                                                                                                                                                                                                                                                                                                                                                                                                                                                                                                                                                                                                                                                                                                                                                                                                                                                                                                                                                                                                                                                                                                                                                                                                                                                                                       | HLA-A,HLA-B                                                                                                                                                                                                                                                                                                                                                                        |

|            |                                       |    |       |      |          |                                                                                                                                                                                                                                                                                                                                                                                                                                                                                                                                                                                                                                                                                                                                                                                                                                                                                                                                                                                                                                                                                                                                                                                                                                                                                                                                                                           |                                                                                                                                                                                                                                                                                                                                                                                            |
|------------|---------------------------------------|----|-------|------|----------|---------------------------------------------------------------------------------------------------------------------------------------------------------------------------------------------------------------------------------------------------------------------------------------------------------------------------------------------------------------------------------------------------------------------------------------------------------------------------------------------------------------------------------------------------------------------------------------------------------------------------------------------------------------------------------------------------------------------------------------------------------------------------------------------------------------------------------------------------------------------------------------------------------------------------------------------------------------------------------------------------------------------------------------------------------------------------------------------------------------------------------------------------------------------------------------------------------------------------------------------------------------------------------------------------------------------------------------------------------------------------|--------------------------------------------------------------------------------------------------------------------------------------------------------------------------------------------------------------------------------------------------------------------------------------------------------------------------------------------------------------------------------------------|
| GO:0065007 | biological regulation                 | 63 | 11740 | 0.12 | 3.40E-03 | 9606.ENSP00000225698,9606.ENSP00000229379,9606.ENSP00000231487,9606.ENSP00000233057,9606.ENSP00000244061,9606.ENSP00000253110,9606.ENSP00000257570,9606.ENSP00000257604,9606.ENSP00000259206,9606.ENSP00000262776,9606.ENSP00000264020,9606.ENSP00000264108,9606.ENSP00000268058,9606.ENSP00000287156,9606.ENSP00000296161,9606.ENSP00000296543,9606.ENSP00000296577,9606.ENSP00000317144,9606.ENSP00000319281,9606.ENSP00000323889,9606.ENSP00000325618,9606.ENSP00000325677,9606.ENSP00000333266,9606.ENSP00000342278,9606.ENSP00000343023,9606.ENSP00000347495,9606.ENSP00000354394,9606.ENSP00000355330,9606.ENSP00000357459,9606.ENSP00000360860,9606.ENSP00000360883,9606.ENSP00000363993,9606.ENSP00000365950,9606.ENSP00000368678,9606.ENSP00000368699,9606.ENSP00000369213,9606.ENSP00000369965,9606.ENSP00000371958,9606.ENSP00000372155,9606.ENSP00000374455,9606.ENSP00000377344,9606.ENSP00000377470,9606.ENSP00000378217,9606.ENSP00000378786,9606.ENSP00000379038,9606.ENSP00000379873,9606.ENSP00000381167,9606.ENSP00000381601,9606.ENSP00000382707,9606.ENSP00000395590,9606.ENSP00000396704,9606.ENSP00000399168,9606.ENSP00000404833,9606.ENSP00000416066,9606.ENSP00000416561,9606.ENSP00000428085,9606.ENSP00000430344,9606.ENSP0000043138,9606.ENSP00000452780,9606.ENSP00000463188,9606.ENSP00000464087,9606.ENSP00000464342,9606.ENSP00000478026 | C1QBP,COX6A1,SKP1,EIF2AK2,RNF114,C19orf66,OASL,TRAFD1,IL1RN,LGALS3BP,IFT46,HAT1,PML,UBE2L6,DTX3L,NAA15,ABCE1,PIBF1,BASP1,TRIM25,PARP10,RNF40,UBA7,OAS2,SP100,WARS,STAT1,TGM2,ADAR,IFIT5,IFIT3,PSMB9,RBM3,AGRN,ISG15,DDX58,BTF3,CD9,PSME1,SQSTM1,DDX60,CNP,PRKCD,HLA-DRA,TYMP,HLA-A,DYNC2H1,MX1,IFITM3,IFI35,TOP2B,HLA-B,TAPBP,SERPINA1,CFB,RPL30,PLCD1,CASP1,B2M,TRIM16,RNF213,RPL36,ANXA8 |
| GO:0006464 | cellular protein modification process | 25 | 2999  | 0.31 | 4.50E-03 | 9606.ENSP00000231487,9606.ENSP00000233057,9606.ENSP00000244061,9606.ENSP00000264108,9606.ENSP00000268058,9606.ENSP00000287156,9606.ENSP00000296161,9606.ENSP00000296543,9606.ENSP00000317144,9606.ENSP00000323889,9606.ENSP00000325618,9606.ENSP00000325677,9606.ENSP00000333266,9606.ENSP0000035330,9606.ENSP00000363993,9606.ENSP00000366819,9606.ENSP00000368699,9606.ENSP00000369213,9606.ENSP00000372155,9606.ENSP00000374455,9606.ENSP00000378217,9606.ENSP00000379873,9606.ENSP00000416066,9606.ENSP00000463188,9606.ENSP00000464087                                                                                                                                                                                                                                                                                                                                                                                                                                                                                                                                                                                                                                                                                                                                                                                                                               | SKP1,EIF2AK2,RNF114,HAT1,PML,UBE2L6,DTX3L,NAA15,PIBF1,TRIM25,PARP10,RNF40,UBA7,TGM2,PSMB9,UCHL3,ISG15,DDX58,PSME1,SQSTM1,PRKCD,HLA-A,SERPINA1,TRIM16,RNF213                                                                                                                                                                                                                                |
| GO:0043412 | macromolecule modification            | 26 | 3197  | 0.3  | 4.60E-03 | 9606.ENSP00000231487,9606.ENSP00000233057,9606.ENSP00000244061,9606.ENSP00000264108,9606.ENSP00000268058,9606.ENSP00000287156,9606.ENSP00000296161,9606.ENSP00000296543,9606.ENSP00000317144,9606.ENSP00000323889,9606.ENSP00000325618,9606.ENSP00000325677,9606.ENSP00000333266,9606.ENSP0000035330,9606.ENSP00000357459,9606.ENSP00000363993,9606.ENSP00000366819,9606.ENSP00000368699,9606.ENSP00000369213,9606.ENSP00000372155,9606.ENSP00000374455,9606.ENSP00000378217,9606.ENSP00000379873,9606.ENSP00000416066,9606.ENSP00000463188,9606.ENSP00000464087                                                                                                                                                                                                                                                                                                                                                                                                                                                                                                                                                                                                                                                                                                                                                                                                          | SKP1,EIF2AK2,RNF114,HAT1,PML,UBE2L6,DTX3L,NAA15,PIBF1,TRIM25,PARP10,RNF40,UBA7,TGM2,ADAR,PSMB9,UCHL3,ISG15,DDX58,PSME1,SQSTM1,PRKCD,HLA-A,SERPINA1,TRIM16,RNF213                                                                                                                                                                                                                           |

|            |                                                           |    |      |      |          |                                                                                                                                                                                                                                                                                                                                                                                                                                                                                                                                                                                                                                  |                                                                                                                                                                               |
|------------|-----------------------------------------------------------|----|------|------|----------|----------------------------------------------------------------------------------------------------------------------------------------------------------------------------------------------------------------------------------------------------------------------------------------------------------------------------------------------------------------------------------------------------------------------------------------------------------------------------------------------------------------------------------------------------------------------------------------------------------------------------------|-------------------------------------------------------------------------------------------------------------------------------------------------------------------------------|
| GO:0044248 | cellular catabolic process                                | 17 | 1646 | 0.41 | 5.40E-03 | 9606.ENSP00000231487,9606.ENSP00000268058,9606.ENSP00000287156,9606.ENSP00000296161,9606.ENSP00000323889,9606.ENSP00000325677,9606.ENSP00000333266,9606.ENSP00000342278,9606.ENSP00000363993,9606.ENSP00000366819,9606.ENSP00000368699,9606.ENSP00000374455,9606.ENSP00000377470,9606.ENSP00000379038,9606.ENSP00000428085,9606.ENSP00000464087,9606.ENSP00000464342                                                                                                                                                                                                                                                             | SKP1,PML,UBE2L6,DTX3L,TRIM25,RNF40,UBA7,OAS2,PSMB9,UCHL3,ISG15,SQSTM1,CNP,TYMP,RPL30,RNF213,RPL36                                                                             |
| GO:0032102 | negative regulation of response to external stimulus      | 7  | 310  | 0.75 | 5.60E-03 | 9606.ENSP00000225698,9606.ENSP00000257604,9606.ENSP00000357459,9606.ENSP00000371958,9606.ENSP00000378217,9606.ENSP00000379873,9606.ENSP00000399168                                                                                                                                                                                                                                                                                                                                                                                                                                                                               | C1QBP,TRAFD1,ADAR,CD9,PRKCD,HLA-A,HLA-B                                                                                                                                       |
| GO:0010390 | histone monoubiquitination                                | 3  | 30   | 1.39 | 6.00E-03 | 9606.ENSP00000231487,9606.ENSP00000296161,9606.ENSP00000325677                                                                                                                                                                                                                                                                                                                                                                                                                                                                                                                                                                   | SKP1,DTX3L,RNF40                                                                                                                                                              |
| GO:0050690 | regulation of defense response to virus by virus          | 3  | 30   | 1.39 | 6.00E-03 | 9606.ENSP00000233057,9606.ENSP00000379873,9606.ENSP00000452780                                                                                                                                                                                                                                                                                                                                                                                                                                                                                                                                                                   | EIF2AK2,HLA-A,B2M                                                                                                                                                             |
| GO:0042270 | protection from natural killer cell mediated cytotoxicity | 2  | 5    | 2    | 6.30E-03 | 9606.ENSP00000379873,9606.ENSP00000399168                                                                                                                                                                                                                                                                                                                                                                                                                                                                                                                                                                                        | HLA-A,HLA-B                                                                                                                                                                   |
| GO:0048583 | regulation of response to stimulus                        | 29 | 3882 | 0.27 | 7.20E-03 | 9606.ENSP00000225698,9606.ENSP00000233057,9606.ENSP00000257604,9606.ENSP00000259206,9606.ENSP00000268058,9606.ENSP00000296161,9606.ENSP00000296577,9606.ENSP00000317144,9606.ENSP00000323889,9606.ENSP00000343023,9606.ENSP00000354394,9606.ENSP00000355330,9606.ENSP00000357459,9606.ENSP00000360860,9606.ENSP00000369213,9606.ENSP00000371958,9606.ENSP00000374455,9606.ENSP00000377344,9606.ENSP00000378217,9606.ENSP00000378786,9606.ENSP00000379038,9606.ENSP00000379873,9606.ENSP00000381167,9606.ENSP00000399168,9606.ENSP00000416561,9606.ENSP00000433138,9606.ENSP00000452780,9606.ENSP00000463188,9606.ENSP00000464087 | C1QBP,EIF2AK2,TRAFD1,IL1RN,PML,DTX3L,ABCE1,PIBF1,TRIM25,SP100,STAT1,TGM2,ADAR,IFIT5,DDX58,CD9,SQSTM1,DDX60,PRKCD,HLA-DRA,TYMP,HLA-A,DYNC2H1,HLA-B,CFB,CASP1,B2M,TRIM16,RNF213 |
| GO:0001959 | regulation of cytokine-mediated signaling pathway         | 5  | 151  | 0.91 | 7.70E-03 | 9606.ENSP00000259206,9606.ENSP00000296577,9606.ENSP00000354394,9606.ENSP00000357459,9606.ENSP00000433138                                                                                                                                                                                                                                                                                                                                                                                                                                                                                                                         | IL1RN,ABCE1,STAT1,ADAR,CASP1                                                                                                                                                  |
| GO:0048584 | positive regulation of response to stimulus               | 19 | 2054 | 0.36 | 8.30E-03 | 9606.ENSP00000225698,9606.ENSP00000233057,9606.ENSP00000268058,9606.ENSP00000296161,9606.ENSP00000317144,9606.ENSP00000323889,9606.ENSP00000355330,9606.ENSP00000360860,9606.ENSP00000369213,9606.ENSP00000377344,9606.ENSP00000378217,9606.ENSP00000378786,9606.ENSP00000379873,9606.ENSP00000381167,9606.ENSP00000399168,9606.ENSP00000416561,9606.ENSP00000433138,9606.ENSP00000452780,9606.ENSP00000463188                                                                                                                                                                                                                   | C1QBP,EIF2AK2,PML,DTX3L,PIBF1,TRIM25,TGM2,IFIT5,DDX58,DDX60,PRKCD,HLA-DRA,HLA-A,DYNC2H1,HLA-B,CFB,CASP1,B2M,TRIM16                                                            |
| GO:0051241 | negative regulation of multicellular organismal process   | 13 | 1098 | 0.47 | 8.40E-03 | 9606.ENSP00000225698,9606.ENSP00000268058,9606.ENSP00000287156,9606.ENSP00000317144,9606.ENSP00000323889,9606.ENSP00000333266,9606.ENSP00000343023,9606.ENSP00000354394,9606.ENSP00000368699,9606.ENSP00000369213,9606.ENSP00000371958,9606.ENSP00000378217,9606.ENSP00000452780                                                                                                                                                                                                                                                                                                                                                 | C1QBP,PML,UBE2L6,PIBF1,TRIM25,UBA7,SP100,STAT1,ISG15,DDX58,CD9,PRKCD,B2M                                                                                                      |
| GO:0039533 | regulation of MDA-5 signaling pathway                     | 2  | 7    | 1.85 | 1.01E-02 | 9606.ENSP00000225698,9606.ENSP00000377344                                                                                                                                                                                                                                                                                                                                                                                                                                                                                                                                                                                        | C1QBP,DDX60                                                                                                                                                                   |
| GO:0050706 | regulation of interleukin-1 beta secretion                | 3  | 37   | 1.3  | 1.01E-02 | 9606.ENSP00000268058,9606.ENSP00000433138,9606.ENSP00000463188                                                                                                                                                                                                                                                                                                                                                                                                                                                                                                                                                                   | PML,CASP1,TRIM16                                                                                                                                                              |



|            |                                                        |    |      |      |          |                                                                                                                                                                                                                                                                                                                                                                                                                                                                                                                                                                                                                                                       |                                                                                                                                                                                    |
|------------|--------------------------------------------------------|----|------|------|----------|-------------------------------------------------------------------------------------------------------------------------------------------------------------------------------------------------------------------------------------------------------------------------------------------------------------------------------------------------------------------------------------------------------------------------------------------------------------------------------------------------------------------------------------------------------------------------------------------------------------------------------------------------------|------------------------------------------------------------------------------------------------------------------------------------------------------------------------------------|
| GO:0034504 | protein localization to nucleus                        | 5  | 164  | 0.88 | 1.05E-02 | 9606.ENSP00000231487,9606.ENSP00000268058,9606.ENSP00000334373,9606.ENSP00000343023,9606.ENSP00000357459                                                                                                                                                                                                                                                                                                                                                                                                                                                                                                                                              | SKP1,PML,KPNA4,SP100,ADAR                                                                                                                                                          |
| GO:0050778 | positive regulation of immune response                 | 9  | 589  | 0.58 | 1.13E-02 | 9606.ENSP00000225698,9606.ENSP00000369213,9606.ENSP0000037344,9606.ENSP00000378217,9606.ENSP00000378786,9606.ENSP00000379873,9606.ENSP00000399168,9606.ENSP00000416561,9606.ENSP00000452780                                                                                                                                                                                                                                                                                                                                                                                                                                                           | C1QBP,DDX58,DDX60,PRKCD,HLA-DRA,HLA-A,HLA-B,CFB,B2M                                                                                                                                |
| GO:0019985 | translesion synthesis                                  | 3  | 41   | 1.26 | 1.26E-02 | 9606.ENSP00000287156,9606.ENSP00000323889,9606.ENSP00000368699                                                                                                                                                                                                                                                                                                                                                                                                                                                                                                                                                                                        | UBE2L6,TRIM25,ISG15                                                                                                                                                                |
| GO:0051234 | establishment of localization                          | 30 | 4248 | 0.24 | 1.29E-02 | 9606.ENSP00000229379,9606.ENSP00000249066,9606.ENSP00000259206,9606.ENSP00000262776,9606.ENSP00000264020,9606.ENSP00000267113,9606.ENSP00000268058,9606.ENSP00000296161,9606.ENSP00000296577,9606.ENSP00000317144,9606.ENSP00000334373,9606.ENSP00000355330,9606.ENSP00000355599,9606.ENSP00000357459,9606.ENSP00000369965,9606.ENSP00000371958,9606.ENSP00000374455,9606.ENSP00000377470,9606.ENSP00000378217,9606.ENSP00000379873,9606.ENSP00000381167,9606.ENSP00000399168,9606.ENSP00000400591,9606.ENSP00000404833,9606.ENSP00000416066,9606.ENSP00000428085,9606.ENSP00000433138,9606.ENSP00000452780,9606.ENSP00000464342,9606.ENSP00000478026 | COX6A1,APOL2,IL1RN,LGALS3BP,IFT46,ESYT1,PML,DTX3L,ABCE1,PIBF1,KPNA4,TGM2,TSNAX,ADAR,BTF3,CD9,SQSTM1,CNP,PRKCD,HLA-A,DYNC2H1,HLA-B,SNRPE,TAPBP,SERPINA1,RPL30,CASP1,B2M,RPL36,ANXA8 |
| GO:0030162 | regulation of proteolysis                              | 10 | 742  | 0.52 | 1.40E-02 | 9606.ENSP00000225698,9606.ENSP00000244061,9606.ENSP00000268058,9606.ENSP00000325677,9606.ENSP00000363993,9606.ENSP00000372155,9606.ENSP00000416066,9606.ENSP00000416561,9606.ENSP00000433138,9606.ENSP00000478026                                                                                                                                                                                                                                                                                                                                                                                                                                     | C1QBP,RNF114,PML,RNF40,PSMB9,PSME1,SERPINA1,CFB,CASP1,ANXA8                                                                                                                        |
| GO:0002684 | positive regulation of immune system process           | 11 | 882  | 0.49 | 1.41E-02 | 9606.ENSP00000225698,9606.ENSP00000354394,9606.ENSP00000368699,9606.ENSP00000369213,9606.ENSP0000037344,9606.ENSP00000378217,9606.ENSP00000378786,9606.ENSP00000379873,9606.ENSP00000399168,9606.ENSP00000416561,9606.ENSP00000452780                                                                                                                                                                                                                                                                                                                                                                                                                 | C1QBP,STAT1,ISG15,DDX58,DDX60,PRKCD,HLA-DRA,HLA-A,HLA-B,CFB,B2M                                                                                                                    |
| GO:0061635 | regulation of protein complex stability                | 2  | 9    | 1.74 | 1.41E-02 | 9606.ENSP00000374455,9606.ENSP00000404833                                                                                                                                                                                                                                                                                                                                                                                                                                                                                                                                                                                                             | SQSTM1,TAPBP                                                                                                                                                                       |
| GO:0006953 | acute-phase response                                   | 3  | 45   | 1.22 | 1.54E-02 | 9606.ENSP00000249066,9606.ENSP00000259206,9606.ENSP00000416066                                                                                                                                                                                                                                                                                                                                                                                                                                                                                                                                                                                        | APOL2,IL1RN,SERPINA1                                                                                                                                                               |
| GO:0045646 | regulation of erythrocyte differentiation              | 3  | 46   | 1.21 | 1.63E-02 | 9606.ENSP00000354394,9606.ENSP00000368699,9606.ENSP00000452780                                                                                                                                                                                                                                                                                                                                                                                                                                                                                                                                                                                        | STAT1,ISG15,B2M                                                                                                                                                                    |
| GO:0010605 | negative regulation of macromolecule metabolic process | 21 | 2558 | 0.31 | 1.64E-02 | 9606.ENSP00000225698,9606.ENSP00000233057,9606.ENSP00000264108,9606.ENSP00000268058,9606.ENSP00000296161,9606.ENSP00000296577,9606.ENSP00000317144,9606.ENSP00000319281,9606.ENSP00000325618,9606.ENSP00000325677,9606.ENSP00000343023,9606.ENSP00000347495,9606.ENSP00000354394,9606.ENSP00000357459,9606.ENSP00000368699,9606.ENSP00000374455,9606.ENSP00000378217,9606.ENSP00000416066,9606.ENSP00000428085,9606.ENSP00000464342,9606.ENSP00000478026                                                                                                                                                                                              | C1QBP,EIF2AK2,HAT1,PML,DTX3L,ABCE1,PIBF1,BASP1,PARP1,RNF40,SP100,WARS,STAT1,ADAR,ISG15,SQSTM1,PRKCD,SERPINA1,RPL30,RPL36,ANXA8                                                     |
| GO:0033523 | histone H2B ubiquitination                             | 2  | 10   | 1.69 | 1.64E-02 | 9606.ENSP00000296161,9606.ENSP00000325677                                                                                                                                                                                                                                                                                                                                                                                                                                                                                                                                                                                                             | DTX3L,RNF40                                                                                                                                                                        |

|            |                                             |    |      |      |          |                                                                                                                                                                                                                                                                                                                                                                                                                                                                                                                                                                                                                                                                                                                      |                                                                                                                                                                                                          |
|------------|---------------------------------------------|----|------|------|----------|----------------------------------------------------------------------------------------------------------------------------------------------------------------------------------------------------------------------------------------------------------------------------------------------------------------------------------------------------------------------------------------------------------------------------------------------------------------------------------------------------------------------------------------------------------------------------------------------------------------------------------------------------------------------------------------------------------------------|----------------------------------------------------------------------------------------------------------------------------------------------------------------------------------------------------------|
| GO:0006810 | transport                                   | 29 | 4130 | 0.24 | 1.71E-02 | 9606.ENSP00000229379,9606.ENSP00000249066,9606.ENSP00000259206,9606.ENSP00000262776,9606.ENSP00000264020,9606.ENSP00000267113,9606.ENSP00000268058,9606.ENSP00000296161,9606.ENSP00000296577,9606.ENSP00000334373,9606.ENSP00000355330,9606.ENSP00000355599,9606.ENSP00000357459,9606.ENSP00000369965,9606.ENSP00000371958,9606.ENSP00000374455,9606.ENSP00000377470,9606.ENSP00000378217,9606.ENSP00000379873,9606.ENSP00000381167,9606.ENSP00000399168,9606.ENSP00000400591,9606.ENSP00000404833,9606.ENSP00000416066,9606.ENSP00000428085,9606.ENSP00000433138,9606.ENSP00000452780,9606.ENSP00000464342,9606.ENSP00000478026                                                                                     | COX6A1,APOL2,IL1RN,LGALS3BP,IFT46,ESYT1,PML,DTX3L,ABCE1,KPNA4,TGM2,TSNAX,ADAR,BTF3,CD9,SQSTM1,CNP,PRKCD,HLA-A,DYNC2H1,HLA-B,SNRPE,TAPBP,SERPINA1,RPL30,CASP1,B2M,RPL36,ANXA8                             |
| GO:0090331 | negative regulation of platelet aggregation | 2  | 11   | 1.65 | 1.88E-02 | 9606.ENSP00000371958,9606.ENSP00000378217                                                                                                                                                                                                                                                                                                                                                                                                                                                                                                                                                                                                                                                                            | CD9,PRKCD                                                                                                                                                                                                |
| GO:0016567 | protein ubiquitination                      | 9  | 645  | 0.54 | 1.89E-02 | 9606.ENSP00000231487,9606.ENSP00000244061,9606.ENSP00000287156,9606.ENSP00000296161,9606.ENSP00000323889,9606.ENSP00000325677,9606.ENSP00000333266,9606.ENSP00000379873,9606.ENSP00000464087                                                                                                                                                                                                                                                                                                                                                                                                                                                                                                                         | SKP1,RNF114,UBE2L6,DTX3L,TRIM25,RNF40,UBA7,HLA-A,RNF213                                                                                                                                                  |
| GO:0033365 | protein localization to organelle           | 9  | 649  | 0.54 | 1.95E-02 | 9606.ENSP00000231487,9606.ENSP00000268058,9606.ENSP00000317144,9606.ENSP00000334373,9606.ENSP00000343023,9606.ENSP00000357459,9606.ENSP00000381167,9606.ENSP00000428085,9606.ENSP00000464342                                                                                                                                                                                                                                                                                                                                                                                                                                                                                                                         | SKP1,PML,PIBF1,KPNA4,SP100,ADAR,DYNC2H1,RPL30,RPL36                                                                                                                                                      |
| GO:0051179 | localization                                | 34 | 5233 | 0.21 | 1.99E-02 | 9606.ENSP00000229379,9606.ENSP00000231487,9606.ENSP00000249066,9606.ENSP00000259206,9606.ENSP00000262776,9606.ENSP00000264020,9606.ENSP00000267113,9606.ENSP00000268058,9606.ENSP00000296161,9606.ENSP00000296577,9606.ENSP00000317144,9606.ENSP00000334373,9606.ENSP00000343023,9606.ENSP00000355330,9606.ENSP00000355599,9606.ENSP00000357459,9606.ENSP00000368678,9606.ENSP00000369965,9606.ENSP00000371958,9606.ENSP00000374455,9606.ENSP00000377470,9606.ENSP00000378217,9606.ENSP00000379873,9606.ENSP00000381167,9606.ENSP00000399168,9606.ENSP00000400591,9606.ENSP00000404833,9606.ENSP00000416066,9606.ENSP00000428085,9606.ENSP00000433138,9606.ENSP00000452780,9606.ENSP00000464342,9606.ENSP00000478026 | COX6A1,SKP1,APOL2,IL1RN,LGALS3BP,IFT46,ESYT1,PML,DTX3L,ABCE1,PIBF1,KPNA4,SP100,TGM2,TSNAX,ADAR,AGRN,BTF3,CD9,SQSTM1,CNP,PRKCD,HLA-A,DYNC2H1,TOP2B,HLA-B,SNRPE,TAPBP,SERPINA1,RPL30,CASP1,B2M,RPL36,ANXA8 |
| GO:0070498 | interleukin-1-mediated signaling pathway    | 3  | 51   | 1.16 | 2.01E-02 | 9606.ENSP00000231487,9606.ENSP00000259206,9606.ENSP00000374455                                                                                                                                                                                                                                                                                                                                                                                                                                                                                                                                                                                                                                                       | SKP1,IL1RN,SQSTM1                                                                                                                                                                                        |
| GO:0032655 | regulation of interleukin-12 production     | 3  | 53   | 1.15 | 2.20E-02 | 9606.ENSP00000225698,9606.ENSP00000317144,9606.ENSP00000399168                                                                                                                                                                                                                                                                                                                                                                                                                                                                                                                                                                                                                                                       | C1QB,PIBF1,HLA-B                                                                                                                                                                                         |
| GO:0033036 | macromolecule localization                  | 19 | 2268 | 0.32 | 2.20E-02 | 9606.ENSP00000231487,9606.ENSP00000249066,9606.ENSP00000259206,9606.ENSP00000264020,9606.ENSP00000267113,9606.ENSP00000268058,9606.ENSP00000296161,9606.ENSP00000296577,9606.ENSP00000317144,9606.ENSP00000334373,9606.ENSP00000343023,9606.ENSP00000355599,9606.ENSP00000357459,9606.ENSP00000368678,9606.ENSP00000369965,9606.ENSP00000374455,9606.ENSP00000381167,9606.ENSP00000428085,9606.ENSP00000464342                                                                                                                                                                                                                                                                                                       | SKP1,APOL2,IL1RN,IFT46,ESYT1,PML,DTX3L,ABCE1,PIBF1,KPNA4,SP100,TSNAX,ADAR,AGRN,BTF3,SQSTM1,DYNC2H1,RPL30,RPL36                                                                                           |

|            |                                                            |    |      |      |          |                                                                                                                                                                                                                                                                                                                                                                                                                                                                                                                                                                                                                                                                                                                                                                                                                                                   |                                                                                                                                                                                                                                              |
|------------|------------------------------------------------------------|----|------|------|----------|---------------------------------------------------------------------------------------------------------------------------------------------------------------------------------------------------------------------------------------------------------------------------------------------------------------------------------------------------------------------------------------------------------------------------------------------------------------------------------------------------------------------------------------------------------------------------------------------------------------------------------------------------------------------------------------------------------------------------------------------------------------------------------------------------------------------------------------------------|----------------------------------------------------------------------------------------------------------------------------------------------------------------------------------------------------------------------------------------------|
| GO:0043123 | positive regulation of I-kappaB kinase/NF-kappaB signaling | 4  | 122  | 0.91 | 2.42E-02 | 9606.ENSP00000323889,9606.ENSP00000355330,9606.ENSP00000360860,9606.ENSP00000433138                                                                                                                                                                                                                                                                                                                                                                                                                                                                                                                                                                                                                                                                                                                                                               | TRIM25,TGM2,IFIT5,CASP1                                                                                                                                                                                                                      |
| GO:0044260 | cellular macromolecule metabolic process                   | 39 | 6413 | 0.18 | 2.42E-02 | 9606.ENSP00000225698,9606.ENSP00000231487,9606.ENSP00000233057,9606.ENSP00000244061,9606.ENSP00000264108,9606.ENSP00000268058,9606.ENSP00000287156,9606.ENSP00000296161,9606.ENSP00000296543,9606.ENSP00000296577,9606.ENSP00000306548,9606.ENSP00000317144,9606.ENSP00000323889,9606.ENSP00000325618,9606.ENSP00000325677,9606.ENSP00000332666,9606.ENSP00000342278,9606.ENSP00000343023,9606.ENSP00000347495,9606.ENSP00000354394,9606.ENSP00000355330,9606.ENSP00000363993,9606.ENSP00000366819,9606.ENSP00000368699,9606.ENSP00000369213,9606.ENSP00000369965,9606.ENSP00000371958,9606.ENSP00000372155,9606.ENSP00000374455,9606.ENSP00000378217,9606.ENSP00000379873,9606.ENSP00000396704,9606.ENSP00000400591,9606.ENSP00000416066,9606.ENSP00000428085,9606.ENSP0000042780,9606.ENSP00000463188,9606.ENSP00000464087,9606.ENSP00000464342 | C1QBP,SKP1,EIF2AK2,RNF114,HAT1,PML,UBE2L6,DTX3L,NAA15,ABCE1,MRPL13,PIBF1,TRIM25,PARP10,RNF40,UBA7,OAS2,SP100,WARS,STAT1,TGM2,PSMB9,UC HL3,ISG15,DDX58,BTF3,CD9,PSME1,SQSTM1,PRKCD,H LA-A, TOP2B,SNRPE,SERPINA1,RPL30,B2M,TRIM16,RNF213,RPL36 |
| GO:0051170 | import into nucleus                                        | 4  | 122  | 0.91 | 2.42E-02 | 9606.ENSP00000268058,9606.ENSP00000334373,9606.ENSP00000357459,9606.ENSP00000400591                                                                                                                                                                                                                                                                                                                                                                                                                                                                                                                                                                                                                                                                                                                                                               | PML, KPNA4, ADAR, SNRPE                                                                                                                                                                                                                      |
| GO:0043933 | protein-containing complex subunit organization            | 16 | 1770 | 0.35 | 2.51E-02 | 9606.ENSP00000225698,9606.ENSP00000231487,9606.ENSP00000264108,9606.ENSP00000268058,9606.ENSP00000296577,9606.ENSP00000306548,9606.ENSP00000355330,9606.ENSP00000357459,9606.ENSP00000374455,9606.ENSP00000378786,9606.ENSP00000379873,9606.ENSP00000381601,9606.ENSP00000400591,9606.ENSP00000404833,9606.ENSP00000416066,9606.ENSP00000464087                                                                                                                                                                                                                                                                                                                                                                                                                                                                                                   | C1QBP,SKP1,HAT1,PML,ABCE1,MRPL13,TGM2,ADAR,SQSTM1,HLA-DRA,HLA-A,MX1,SNRPE,TAPBP,SERPINA1,RNF213                                                                                                                                              |
| GO:0044092 | negative regulation of molecular function                  | 12 | 1119 | 0.42 | 2.53E-02 | 9606.ENSP00000259206,9606.ENSP00000268058,9606.ENSP00000296161,9606.ENSP00000296577,9606.ENSP00000325618,9606.ENSP00000343023,9606.ENSP00000347495,9606.ENSP00000357459,9606.ENSP00000378217,9606.ENSP00000416066,9606.ENSP00000452780,9606.ENSP00000478026                                                                                                                                                                                                                                                                                                                                                                                                                                                                                                                                                                                       | IL1RN,PML,DTX3L,ABCE1,PARP10,SP100,WARS,ADAR,PRKCD,SERPINA1,B2M,ANXA8                                                                                                                                                                        |
| GO:0051172 | negative regulation of nitrogen compound metabolic process | 19 | 2307 | 0.31 | 2.56E-02 | 9606.ENSP00000225698,9606.ENSP00000233057,9606.ENSP00000264108,9606.ENSP00000268058,9606.ENSP00000296161,9606.ENSP00000296577,9606.ENSP00000317144,9606.ENSP00000319281,9606.ENSP00000325618,9606.ENSP00000325677,9606.ENSP00000343023,9606.ENSP00000347495,9606.ENSP00000354394,9606.ENSP00000357459,9606.ENSP00000368699,9606.ENSP00000374455,9606.ENSP00000378217,9606.ENSP00000416066,9606.ENSP00000478026                                                                                                                                                                                                                                                                                                                                                                                                                                    | C1QBP,EIF2AK2,HAT1,PML,DTX3L,ABCE1,PIBF1,BASP1,PARP10,RNF40,SP100,WARS,STAT1,ADAR,ISG15,SQSTM1,PRKCD,SERPINA1,ANXA8                                                                                                                          |
| GO:0072075 | metanephric mesenchyme development                         | 2  | 14   | 1.55 | 2.58E-02 | 9606.ENSP00000319281,9606.ENSP00000354394                                                                                                                                                                                                                                                                                                                                                                                                                                                                                                                                                                                                                                                                                                                                                                                                         | BASP1,STAT1                                                                                                                                                                                                                                  |
| GO:0008104 | protein localization                                       | 17 | 1966 | 0.33 | 2.68E-02 | 9606.ENSP00000231487,9606.ENSP00000259206,9606.ENSP00000264020,9606.ENSP00000268058,9606.ENSP00000296161,9606.ENSP00000296577,9606.ENSP00000317144,9606.ENSP00000334373,9606.ENSP00000343023,9606.ENSP00000355599,9606.ENSP00000357459,9606.ENSP00000368678,9606.ENSP00000369965,9606.ENSP00000374455,9606.ENSP00000381167,9606.ENSP00000428085,9606.ENSP00000464342                                                                                                                                                                                                                                                                                                                                                                                                                                                                              | SKP1,IL1RN,IFT46,PML,DTX3L,ABCE1,PIBF1,KPNA4,SP100,TSNAX,ADAR,AGRN,BTF3,SQSTM1,DYNC2H1,RPL30,RPL36                                                                                                                                           |

|            |                                                                       |    |      |      |          |                                                                                                                                                                                                                                                                                                                                                                                          |                                                                                                              |
|------------|-----------------------------------------------------------------------|----|------|------|----------|------------------------------------------------------------------------------------------------------------------------------------------------------------------------------------------------------------------------------------------------------------------------------------------------------------------------------------------------------------------------------------------|--------------------------------------------------------------------------------------------------------------|
| GO:0016045 | detection of bacterium                                                | 2  | 15   | 1.52 | 2.79E-02 | 9606.ENSP00000379873,9606.ENSP00000399168                                                                                                                                                                                                                                                                                                                                                | HLA-A,HLA-B                                                                                                  |
| GO:1901698 | response to nitrogen compound                                         | 11 | 988  | 0.44 | 2.79E-02 | 9606.ENSP00000323889,9606.ENSP00000325677,9606.ENSP00000354394,9606.ENSP00000357459,9606.ENSP00000358327,9606.ENSP0000368678,9606.ENSP00000369213,9606.ENSP00000371958,9606.ENSP00000378217,9606.ENSP00000433138,9606.ENSP00000463188                                                                                                                                                    | TRIM25,RNF40,STAT1,ADAR,CASP7,AGRN,DDX58,CD9,PRKCD,CASP1,TRIM16                                              |
| GO:0032695 | negative regulation of interleukin-12 production                      | 2  | 16   | 1.49 | 3.07E-02 | 9606.ENSP00000225698,9606.ENSP00000317144                                                                                                                                                                                                                                                                                                                                                | C1QBP,PIBF1                                                                                                  |
| GO:0051641 | cellular localization                                                 | 18 | 2180 | 0.31 | 3.10E-02 | 9606.ENSP00000231487,9606.ENSP00000264020,9606.ENSP00000267113,9606.ENSP00000268058,9606.ENSP00000296161,9606.ENSP0000296577,9606.ENSP00000317144,9606.ENSP00000334373,9606.ENSP00000343023,9606.ENSP00000357459,9606.ENSP00000368678,9606.ENSP00000374455,9606.ENSP00000381167,9606.ENSP00000400591,9606.ENSP00000416066,9606.ENSP00000428085,9606.ENSP00000464342,9606.ENSP00000478026 | SKP1,IFT46,ESYT1,PML,DTX3L,ABCE1,PIBF1,KPNA4,SP100,ADAR,AGRN,SQSTM1,DYNC2H1,SNRPE,SERPINA1,RPL30,RPL36,ANXA8 |
| GO:0032269 | negative regulation of cellular protein metabolic process             | 11 | 1014 | 0.43 | 3.28E-02 | 9606.ENSP00000233057,9606.ENSP00000268058,9606.ENSP00000296161,9606.ENSP00000317144,9606.ENSP00000325618,9606.ENSP0000347495,9606.ENSP00000357459,9606.ENSP00000368699,9606.ENSP00000378217,9606.ENSP00000416066,9606.ENSP00000478026                                                                                                                                                    | EIF2AK2,PML,DTX3L,PIBF1,PARP10,WARS,ADAR,ISG15,PRKCD,SERPINA1,ANXA8                                          |
| GO:0008631 | intrinsic apoptotic signaling pathway in response to oxidative stress | 2  | 17   | 1.46 | 3.30E-02 | 9606.ENSP00000268058,9606.ENSP00000378217                                                                                                                                                                                                                                                                                                                                                | PML,PRKCD                                                                                                    |
| GO:0048384 | retinoic acid receptor signaling pathway                              | 2  | 17   | 1.46 | 3.30E-02 | 9606.ENSP00000268058,9606.ENSP00000343023                                                                                                                                                                                                                                                                                                                                                | PML,SP100                                                                                                    |
| GO:1902187 | negative regulation of viral release from host cell                   | 2  | 17   | 1.46 | 3.30E-02 | 9606.ENSP00000268058,9606.ENSP00000323889                                                                                                                                                                                                                                                                                                                                                | PML,TRIM25                                                                                                   |
| GO:0016570 | histone modification                                                  | 6  | 347  | 0.63 | 3.53E-02 | 9606.ENSP00000231487,9606.ENSP00000264108,9606.ENSP00000296161,9606.ENSP00000325677,9606.ENSP00000378217,9606.ENSP00000463188                                                                                                                                                                                                                                                            | SKP1,HAT1,DTX3L,RNF40,PRKCD,TRIM16                                                                           |
| GO:0031397 | negative regulation of protein ubiquitination                         | 3  | 68   | 1.04 | 3.53E-02 | 9606.ENSP00000296161,9606.ENSP00000325618,9606.ENSP00000368699                                                                                                                                                                                                                                                                                                                           | DTX3L,PARP10,ISG15                                                                                           |
| GO:0039535 | regulation of RIG-I signaling pathway                                 | 2  | 18   | 1.44 | 3.53E-02 | 9606.ENSP00000225698,9606.ENSP00000377344                                                                                                                                                                                                                                                                                                                                                | C1QBP,DDX60                                                                                                  |
| GO:0043555 | regulation of translation in response to stress                       | 2  | 18   | 1.44 | 3.53E-02 | 9606.ENSP00000233057,9606.ENSP00000268058                                                                                                                                                                                                                                                                                                                                                | EIF2AK2,PML                                                                                                  |
| GO:0046597 | negative regulation of viral entry into host cell                     | 2  | 18   | 1.44 | 3.53E-02 | 9606.ENSP00000323889,9606.ENSP00000382707                                                                                                                                                                                                                                                                                                                                                | TRIM25,IFITM3                                                                                                |
| GO:0065003 | protein-containing complex assembly                                   | 14 | 1514 | 0.36 | 3.53E-02 | 9606.ENSP00000225698,9606.ENSP00000231487,9606.ENSP00000264108,9606.ENSP00000268058,9606.ENSP00000355330,9606.ENSP0000357459,9606.ENSP00000374455,9606.ENSP00000378786,9606.ENSP00000379873,9606.ENSP00000381601,9606.ENSP00000400591,9606.ENSP00000404833,9606.ENSP00000416066,9606.ENSP00000464087                                                                                     | C1QBP,SKP1,HAT1,PML,TGM2,ADAR,SQSTM1,HLA-DRA,HLA-A,MX1,SNRPE,TAPBP,SERPINA1,RNF213                           |
| GO:0002726 | positive regulation of T cell cytokine production                     | 2  | 19   | 1.42 | 3.72E-02 | 9606.ENSP00000379873,9606.ENSP00000452780                                                                                                                                                                                                                                                                                                                                                | HLA-A,B2M                                                                                                    |

|            |                                                         |    |      |      |          |                                                                                                                                                                                                                                                                                                                                                                                                                                                                                                                                                                                                                                                                                                                                                                                                                                                                                                                                                                                                                                                 |                                                                                                                                                                                                                                                                                             |
|------------|---------------------------------------------------------|----|------|------|----------|-------------------------------------------------------------------------------------------------------------------------------------------------------------------------------------------------------------------------------------------------------------------------------------------------------------------------------------------------------------------------------------------------------------------------------------------------------------------------------------------------------------------------------------------------------------------------------------------------------------------------------------------------------------------------------------------------------------------------------------------------------------------------------------------------------------------------------------------------------------------------------------------------------------------------------------------------------------------------------------------------------------------------------------------------|---------------------------------------------------------------------------------------------------------------------------------------------------------------------------------------------------------------------------------------------------------------------------------------------|
| GO:1902914 | regulation of protein polyubiquitination                | 2  | 19   | 1.42 | 3.72E-02 | 9606.ENSPO0000325618,9606.ENSPO0000325677                                                                                                                                                                                                                                                                                                                                                                                                                                                                                                                                                                                                                                                                                                                                                                                                                                                                                                                                                                                                       | PARP10,RNF40                                                                                                                                                                                                                                                                                |
| GO:0032069 | regulation of nuclease activity                         | 2  | 20   | 1.39 | 4.00E-02 | 9606.ENSPO0000296577,9606.ENSPO0000378217                                                                                                                                                                                                                                                                                                                                                                                                                                                                                                                                                                                                                                                                                                                                                                                                                                                                                                                                                                                                       | ABCE1,PRKCD                                                                                                                                                                                                                                                                                 |
| GO:0044237 | cellular metabolic process                              | 48 | 8797 | 0.13 | 4.00E-02 | 9606.ENSPO0000225698,9606.ENSPO0000229379,9606.ENSPO0000231487,9606.ENSPO0000233057,9606.ENSPO0000244061,9606.ENSPO0000264108,9606.ENSPO0000268058,9606.ENSPO0000287156,9606.ENSPO0000296161,9606.ENSPO0000296543,9606.ENSPO0000296577,9606.ENSPO0000306548,9606.ENSPO0000317144,9606.ENSPO0000323889,9606.ENSPO0000325618,9606.ENSPO0000325677,9606.ENSPO0000333019,9606.ENSPO0000333266,9606.ENSPO0000342278,9606.ENSPO0000343023,9606.ENSPO0000347495,9606.ENSPO0000354394,9606.ENSPO0000355330,9606.ENSPO0000357459,9606.ENSPO0000363993,9606.ENSPO0000365950,9606.ENSPO0000366819,9606.ENSPO0000368678,9606.ENSPO0000368699,9606.ENSPO0000369213,9606.ENSPO0000369965,9606.ENSPO0000371958,9606.ENSPO0000372155,9606.ENSPO0000374455,9606.ENSPO0000377470,9606.ENSPO0000378217,9606.ENSPO0000379038,9606.ENSPO0000379873,9606.ENSPO0000396704,9606.ENSPO0000400591,9606.ENSPO0000404833,9606.ENSPO0000416066,9606.ENSPO0000428085,9606.ENSPO0000430344,9606.ENSPO0000452780,9606.ENSPO0000463188,9606.ENSPO0000464087,9606.ENSPO0000464342 | C1QBP,COX6A1,SKP1,EIF2AK2,RNF114,HAT1,PML,UBE2L6,DTX3L,NAA15,ABCE1,MRPL13,PIBF1,TRIM25,PARP10,RNF40,ADSSL1,UBA7,OAS2,SP100,WARS,STAT1,TGM2,ADAR,PSMB9,RBM3,UCHL3,AGRN,ISG15,DDX58,BTF3,CD9,PSME1,SQSTM1,CNP,PRKCD,TYMP,HLA-A,TOP2B,SNRPE,TAPBP,SERPINA1,RPL30,PLCD1,B2M,TRIM16,RNF213,RPL36 |
| GO:0051240 | positive regulation of multicellular organismal process | 14 | 1551 | 0.35 | 4.02E-02 | 9606.ENSPO0000225698,9606.ENSPO0000233057,9606.ENSPO0000268058,9606.ENSPO0000317144,9606.ENSPO0000319281,9606.ENSPO0000354394,9606.ENSPO0000368678,9606.ENSPO0000368699,9606.ENSPO0000369213,9606.ENSPO0000377344,9606.ENSPO0000379873,9606.ENSPO0000433138,9606.ENSPO0000452780,9606.ENSPO0000463188                                                                                                                                                                                                                                                                                                                                                                                                                                                                                                                                                                                                                                                                                                                                           | C1QBP,EIF2AK2,PML,PIBF1,BASP1,STAT1,AGRN,ISG15,DDX58,DDX60,HLA-A,CASP1,B2M,TRIM16                                                                                                                                                                                                           |
| GO:0006412 | translation                                             | 6  | 362  | 0.61 | 4.06E-02 | 9606.ENSPO0000233057,9606.ENSPO0000296577,9606.ENSPO0000306548,9606.ENSPO0000347495,9606.ENSPO0000428085,9606.ENSPO0000464342                                                                                                                                                                                                                                                                                                                                                                                                                                                                                                                                                                                                                                                                                                                                                                                                                                                                                                                   | EIF2AK2,ABCE1,MRPL13,WARS,RPL30,RPL36                                                                                                                                                                                                                                                       |
| GO:0042742 | defense response to bacterium                           | 5  | 250  | 0.69 | 4.06E-02 | 9606.ENSPO0000368699,9606.ENSPO0000378217,9606.ENSPO0000379873,9606.ENSPO0000428085,9606.ENSPO0000452780                                                                                                                                                                                                                                                                                                                                                                                                                                                                                                                                                                                                                                                                                                                                                                                                                                                                                                                                        | ISG15,PRKCD,HLA-A,RPL30,B2M                                                                                                                                                                                                                                                                 |
| GO:0006959 | humoral immune response                                 | 5  | 252  | 0.69 | 4.13E-02 | 9606.ENSPO0000225698,9606.ENSPO0000379873,9606.ENSPO0000416561,9606.ENSPO0000428085,9606.ENSPO0000452780                                                                                                                                                                                                                                                                                                                                                                                                                                                                                                                                                                                                                                                                                                                                                                                                                                                                                                                                        | C1QBP,HLA-A,CFB,RPL30,B2M                                                                                                                                                                                                                                                                   |
| GO:0046907 | intracellular transport                                 | 13 | 1390 | 0.36 | 4.13E-02 | 9606.ENSPO0000264020,9606.ENSPO0000268058,9606.ENSPO0000296161,9606.ENSPO0000296577,9606.ENSPO0000334373,9606.ENSPO0000357459,9606.ENSPO0000374455,9606.ENSPO0000381167,9606.ENSPO0000400591,9606.ENSPO0000416066,9606.ENSPO0000428085,9606.ENSPO0000464342,9606.ENSPO0000478026                                                                                                                                                                                                                                                                                                                                                                                                                                                                                                                                                                                                                                                                                                                                                                | IFT46,PML,DTX3L,ABCE1,KPNA4,ADAR,SQSTM1,DYNC2H1,SNRPE,SERPINA1,RPL30,RPL36,ANXA8                                                                                                                                                                                                            |
| GO:0031324 | negative regulation of cellular metabolic process       | 19 | 2463 | 0.28 | 4.16E-02 | 9606.ENSPO0000225698,9606.ENSPO0000233057,9606.ENSPO0000264108,9606.ENSPO0000268058,9606.ENSPO0000296161,9606.ENSPO0000296577,9606.ENSPO0000317144,9606.ENSPO0000319281,9606.ENSPO0000325618,9606.ENSPO0000325677,9606.ENSPO0000343023,9606.ENSPO0000347495,9606.ENSPO0000354394,9606.ENSPO0000357459,9606.ENSPO0000368699,9606.ENSPO0000374455,9606.ENSPO0000378217,9606.ENSPO0000416066,9606.ENSPO0000478026                                                                                                                                                                                                                                                                                                                                                                                                                                                                                                                                                                                                                                  | C1QBP,EIF2AK2,HAT1,PML,DTX3L,ABCE1,PIBF1,BASP1,PARP10,RNF40,SP100,WARS,STAT1,ADAR,ISG15,SQSTM1,PRKCD,SERPINA1,ANXA8                                                                                                                                                                         |

|            |                                                    |    |      |      |          |                                                                                                                                                                                                                                                                                                                                                                                                                                                                                                                                                                                                                                                      |                                                                                                                                                                                 |
|------------|----------------------------------------------------|----|------|------|----------|------------------------------------------------------------------------------------------------------------------------------------------------------------------------------------------------------------------------------------------------------------------------------------------------------------------------------------------------------------------------------------------------------------------------------------------------------------------------------------------------------------------------------------------------------------------------------------------------------------------------------------------------------|---------------------------------------------------------------------------------------------------------------------------------------------------------------------------------|
| GO:0051246 | regulation of protein metabolic process            | 20 | 2668 | 0.27 | 4.33E-02 | 9606.ENSP00000225698,9606.ENSP00000233057,9606.ENSP0000024061,9606.ENSP00000268058,9606.ENSP00000296161,9606.ENSP00000317144,9606.ENSP00000325618,9606.ENSP00000325677,9606.ENSP00000347495,9606.ENSP00000357459,9606.ENSP00000363993,9606.ENSP00000365950,9606.ENSP00000368699,9606.ENSP00000372155,9606.ENSP00000374455,9606.ENSP00000378217,9606.ENSP0000416066,9606.ENSP00000416561,9606.ENSP00000433138,9606.ENSP00000478026                                                                                                                                                                                                                    | C1QBP,EIF2AK2,RNF114,PML,DTX3L,PIBF1,PARP10,RNF40,WARS,ADAR,PSMB9,RBM3,ISG15,PSME1,SQSTM1,PRKCD,SERPINA1,CFB,CASP1,ANXA8                                                        |
| GO:0006518 | peptide metabolic process                          | 7  | 497  | 0.54 | 4.38E-02 | 9606.ENSP00000233057,9606.ENSP00000296577,9606.ENSP000003000428085,9606.ENSP00000464342                                                                                                                                                                                                                                                                                                                                                                                                                                                                                                                                                              | EIF2AK2,ABCE1,MRPL13,WARS,TAPBP,RPL30,RPL36                                                                                                                                     |
| GO:0006913 | nucleocytoplasmic transport                        | 5  | 263  | 0.67 | 4.74E-02 | 9606.ENSP00000268058,9606.ENSP00000296577,9606.ENSP00000334373,9606.ENSP00000357459,9606.ENSP00000400591                                                                                                                                                                                                                                                                                                                                                                                                                                                                                                                                             | PML,ABCE1,KPNA4,ADAR,SNRPE                                                                                                                                                      |
| GO:0007165 | signal transduction                                | 30 | 4738 | 0.2  | 4.74E-02 | 9606.ENSP00000225698,9606.ENSP00000231487,9606.ENSP00000233057,9606.ENSP00000257570,9606.ENSP00000259206,9606.ENSP00000262776,9606.ENSP00000264020,9606.ENSP00000268058,9606.ENSP00000323889,9606.ENSP00000342278,9606.ENSP00000343023,9606.ENSP00000354394,9606.ENSP00000355330,9606.ENSP00000357459,9606.ENSP00000360883,9606.ENSP00000368678,9606.ENSP00000368699,9606.ENSP00000369213,9606.ENSP00000371958,9606.ENSP00000374455,9606.ENSP00000378217,9606.ENSP00000378786,9606.ENSP00000379873,9606.ENSP00000381601,9606.ENSP00000382707,9606.ENSP00000395590,9606.ENSP00000399168,9606.ENSP0000430344,9606.ENSP00000433138,9606.ENSP00000452780 | C1QBP,SKP1,EIF2AK2,OASL,IL1RN,LGALS3BP,IFT46,PML,TRIM25,OAS2,SP100,STAT1,TGM2,ADAR,IFIT3,AGRN,ISG15,DDX58,CD9,SQSTM1,PRKCD,HLA-DRA,HLA-A,MX1,IFITM3,IFI35,HLA-B,PLCD1,CASP1,B2M |
| GO:0032469 | endoplasmic reticulum calcium ion homeostasis      | 2  | 23   | 1.33 | 4.74E-02 | 9606.ENSP00000268058,9606.ENSP00000355330                                                                                                                                                                                                                                                                                                                                                                                                                                                                                                                                                                                                            | PML,TGM2                                                                                                                                                                        |
| GO:0032727 | positive regulation of interferon-alpha production | 2  | 23   | 1.33 | 4.74E-02 | 9606.ENSP00000354394,9606.ENSP00000369213                                                                                                                                                                                                                                                                                                                                                                                                                                                                                                                                                                                                            | STAT1,DDX58                                                                                                                                                                     |
| GO:0033522 | histone H2A ubiquitination                         | 2  | 23   | 1.33 | 4.74E-02 | 9606.ENSP00000231487,9606.ENSP00000296161                                                                                                                                                                                                                                                                                                                                                                                                                                                                                                                                                                                                            | SKP1,DTX3L                                                                                                                                                                      |
| GO:0035456 | response to interferon-beta                        | 2  | 23   | 1.33 | 4.74E-02 | 9606.ENSP00000354394,9606.ENSP00000382707                                                                                                                                                                                                                                                                                                                                                                                                                                                                                                                                                                                                            | STAT1,IFITM3                                                                                                                                                                    |
| GO:0072215 | regulation of metanephros development              | 2  | 23   | 1.33 | 4.74E-02 | 9606.ENSP00000319281,9606.ENSP00000354394                                                                                                                                                                                                                                                                                                                                                                                                                                                                                                                                                                                                            | BASP1,STAT1                                                                                                                                                                     |
| GO:0032897 | negative regulation of viral transcription         | 2  | 24   | 1.31 | 4.91E-02 | 9606.ENSP00000343023,9606.ENSP00000382707                                                                                                                                                                                                                                                                                                                                                                                                                                                                                                                                                                                                            | SP100,IFITM3                                                                                                                                                                    |
| GO:0050821 | protein stabilization                              | 4  | 166  | 0.78 | 4.91E-02 | 9606.ENSP00000264020,9606.ENSP00000268058,9606.ENSP00000296577,9606.ENSP00000378217                                                                                                                                                                                                                                                                                                                                                                                                                                                                                                                                                                  | IFT46,PML,NAA15,PRKCD                                                                                                                                                           |
| GO:0042886 | amide transport                                    | 13 | 1440 | 0.35 | 4.96E-02 | 9606.ENSP00000259206,9606.ENSP00000264020,9606.ENSP00000268058,9606.ENSP00000296161,9606.ENSP00000296577,9606.ENSP00000334373,9606.ENSP00000355599,9606.ENSP00000357459,9606.ENSP00000369965,9606.ENSP00000381167,9606.ENSP00000404833,9606.ENSP00000428085,9606.ENSP00000464342                                                                                                                                                                                                                                                                                                                                                                     | IL1RN,IFT46,PML,DTX3L,ABCE1,KPNA4,TSNAX,ADAR,BTF3,DYNC2H1,TAPBP,RPL30,RPL36                                                                                                     |

T = 72 h (mock) IFN $\alpha$ 7 / Untreated

| #Term ID   | Term Description                    | Observed Gene Count | Background Gene Count | Strength | False Discovery Rate | Matching Proteins in Your Input (IDs)                                                                                                                                                                                                                                                                                                                                                                                               | Matching Proteins in Your Input (Labels)                                                                               |
|------------|-------------------------------------|---------------------|-----------------------|----------|----------------------|-------------------------------------------------------------------------------------------------------------------------------------------------------------------------------------------------------------------------------------------------------------------------------------------------------------------------------------------------------------------------------------------------------------------------------------|------------------------------------------------------------------------------------------------------------------------|
| GO:0034340 | response to type I interferon       | 9                   | 70                    | 1.6      | 5.91E-09             | 9606.ENSP00000253110,9606.ENSP00000342278,9606.ENSP00000354394,9606.ENSP00000360883,9606.ENSP00000365402,9606.ENSP00000368699,9606.ENSP00000381601,9606.ENSP00000395590,9606.ENSP00000399168                                                                                                                                                                                                                                        | C19orf66,OAS2,STAT1,IFIT3,HLA-C,ISG15,MX1,IFI35,HLA-B                                                                  |
| GO:0009615 | response to virus                   | 12                  | 270                   | 1.14     | 6.97E-08             | 9606.ENSP00000233057,9606.ENSP00000253110,9606.ENSP00000268058,9606.ENSP00000342278,9606.ENSP00000354394,9606.ENSP00000359783,9606.ENSP00000359787,9606.ENSP00000360883,9606.ENSP00000368699,9606.ENSP00000369213,9606.ENSP00000381601,9606.ENSP00000399888                                                                                                                                                                         | EIF2AK2,C19orf66,PML,OAS2,STAT1,IFI44,IFI44L,IFIT3,ISG15,DDX58,MX1,HMGA1                                               |
| GO:0060337 | type I interferon signaling pathway | 8                   | 65                    | 1.58     | 6.97E-08             | 9606.ENSP00000342278,9606.ENSP00000354394,9606.ENSP00000360883,9606.ENSP00000365402,9606.ENSP00000368699,9606.ENSP00000381601,9606.ENSP00000395590,9606.ENSP00000399168                                                                                                                                                                                                                                                             | OAS2,STAT1,IFIT3,HLA-C,ISG15,MX1,IFI35,HLA-B                                                                           |
| GO:0051607 | defense response to virus           | 10                  | 181                   | 1.23     | 1.69E-07             | 9606.ENSP00000233057,9606.ENSP00000253110,9606.ENSP00000268058,9606.ENSP00000342278,9606.ENSP00000354394,9606.ENSP00000359787,9606.ENSP00000360883,9606.ENSP00000368699,9606.ENSP00000369213,9606.ENSP00000381601                                                                                                                                                                                                                   | EIF2AK2,C19orf66,PML,OAS2,STAT1,IFI44L,IFIT3,ISG15,DDX58,MX1                                                           |
| GO:0006952 | defense response                    | 20                  | 1234                  | 0.7      | 3.03E-07             | 9606.ENSP00000233057,9606.ENSP00000253110,9606.ENSP00000259206,9606.ENSP00000263636,9606.ENSP00000268058,9606.ENSP00000342278,9606.ENSP00000354394,9606.ENSP00000358045,9606.ENSP00000359490,9606.ENSP00000359787,9606.ENSP00000360883,9606.ENSP00000365402,9606.ENSP00000368699,9606.ENSP00000369213,9606.ENSP00000381601,9606.ENSP00000384886,9606.ENSP00000395590,9606.ENSP00000399168,9606.ENSP00000428085,9606.ENSP00000478874 | EIF2AK2,C19orf66,IL1RN,LY75,PML,OAS2,STAT1,ECM1,GBP4,IFI44L,IFIT3,HLA-C,ISG15,DDX58,MX1,IFI30,IFI35,HLA-B,RPL30,CAMK1D |
| GO:0051707 | response to other organism          | 19                  | 1173                  | 0.7      | 7.72E-07             | 9606.ENSP00000233057,9606.ENSP00000253110,9606.ENSP00000268058,9606.ENSP00000312988,9606.ENSP00000342278,9606.ENSP00000354394,9606.ENSP00000359490,9606.ENSP00000359783,9606.ENSP00000359787,9606.ENSP00000360883,9606.ENSP00000365402,9606.ENSP00000368699,9606.ENSP00000369213,9606.ENSP00000381601,9606.ENSP00000384886,9606.ENSP00000395590,9606.ENSP00000399168,9606.ENSP00000399888,9606.ENSP00000428085                      | EIF2AK2,C19orf66,PML,NFKBIB,OAS2,STAT1,GBP4,IFI44,IFI44L,IFIT3,HLA-C,ISG15,DDX58,MX1,IFI30,IFI35,HLA-B,HMGA1,RPL30     |
| GO:0098542 | defense response to other organism  | 16                  | 859                   | 0.76     | 1.86E-06             | 9606.ENSP00000233057,9606.ENSP00000253110,9606.ENSP00000268058,9606.ENSP00000342278,9606.ENSP00000354394,9606.ENSP00000359490,9606.ENSP00000359787,9606.ENSP00000360883,9606.ENSP00000365402,9606.ENSP00000368699,9606.ENSP00000369213,9606.ENSP00000381601,9606.ENSP00000384886,9606.ENSP00000395590,9606.ENSP00000399168,9606.ENSP00000428085                                                                                     | EIF2AK2,C19orf66,PML,OAS2,STAT1,GBP4,IFI44L,IFIT3,HLA-C,ISG15,DDX58,MX1,IFI30,IFI35,HLA-B,RPL30                        |

|            |                                                 |    |      |      |          |                                                                                                                                                                                                                                                                                                                                                                                                                |                                                                                                                |
|------------|-------------------------------------------------|----|------|------|----------|----------------------------------------------------------------------------------------------------------------------------------------------------------------------------------------------------------------------------------------------------------------------------------------------------------------------------------------------------------------------------------------------------------------|----------------------------------------------------------------------------------------------------------------|
| GO:0045087 | innate immune response                          | 14 | 676  | 0.81 | 4.57E-06 | 9606.ENSP00000233057,9606.ENSP00000253110,9606.ENSP00000268058,9606.ENSP00000342278,9606.ENSP00000354394,9606.ENSP00000359490,9606.ENSP00000360883,9606.ENSP00000365402,9606.ENSP00000368699,9606.ENSP00000369213,9606.ENSP00000381601,9606.ENSP00000384886,9606.ENSP00000395590,9606.ENSP00000399168                                                                                                          | EIF2AK2,C19orf66,PML,OAS2,STAT1,GBP4,IFIT3,HLA-C,ISG15,DDX58,MX1,IFI30,IFI35,HLA-B                             |
| GO:0048525 | negative regulation of viral process            | 7  | 93   | 1.37 | 4.57E-06 | 9606.ENSP00000233057,9606.ENSP00000253110,9606.ENSP00000268058,9606.ENSP00000325618,9606.ENSP00000354394,9606.ENSP00000368699,9606.ENSP00000381601                                                                                                                                                                                                                                                             | EIF2AK2,C19orf66,PML,PARP10,STAT1,ISG15,MX1                                                                    |
| GO:0034341 | response to interferon-gamma                    | 8  | 176  | 1.15 | 1.69E-05 | 9606.ENSP00000253110,9606.ENSP00000268058,9606.ENSP00000342278,9606.ENSP00000354394,9606.ENSP00000359490,9606.ENSP00000365402,9606.ENSP00000384886,9606.ENSP00000399168                                                                                                                                                                                                                                        | C19orf66,PML,OAS2,STAT1,GBP4,HLA-C,IFI30,HLA-B                                                                 |
| GO:0060333 | interferon-gamma-mediated signaling pathway     | 6  | 69   | 1.43 | 1.78E-05 | 9606.ENSP00000268058,9606.ENSP00000342278,9606.ENSP00000354394,9606.ENSP00000365402,9606.ENSP00000384886,9606.ENSP00000399168                                                                                                                                                                                                                                                                                  | PML,OAS2,STAT1,HLA-C,IFI30,HLA-B                                                                               |
| GO:0006955 | immune response                                 | 19 | 1560 | 0.58 | 3.05E-05 | 9606.ENSP00000233057,9606.ENSP00000253110,9606.ENSP00000259206,9606.ENSP00000261811,9606.ENSP00000263636,9606.ENSP00000268058,9606.ENSP00000342278,9606.ENSP00000354394,9606.ENSP00000359490,9606.ENSP00000360883,9606.ENSP00000365402,9606.ENSP00000366525,9606.ENSP00000368699,9606.ENSP00000369213,9606.ENSP00000381601,9606.ENSP00000384886,9606.ENSP00000395590,9606.ENSP00000399168,9606.ENSP00000428085 | EIF2AK2,C19orf66,IL1RN,CYSTM1,LY75,PML,OAS2,STAT1,GBP4,IFIT3,HLA-C,FTL,ISG15,DDX58,MX1,IFI30,IFI35,HLA-B,RPL30 |
| GO:1903901 | negative regulation of viral life cycle         | 6  | 77   | 1.38 | 3.05E-05 | 9606.ENSP00000233057,9606.ENSP00000253110,9606.ENSP00000268058,9606.ENSP00000325618,9606.ENSP00000368699,9606.ENSP00000381601                                                                                                                                                                                                                                                                                  | EIF2AK2,C19orf66,PML,PARP10,ISG15,MX1                                                                          |
| GO:0043901 | negative regulation of multi-organism process   | 8  | 212  | 1.07 | 5.05E-05 | 9606.ENSP00000233057,9606.ENSP00000253110,9606.ENSP00000268058,9606.ENSP00000325618,9606.ENSP00000354394,9606.ENSP00000368699,9606.ENSP00000381601,9606.ENSP00000399168                                                                                                                                                                                                                                        | EIF2AK2,C19orf66,PML,PARP10,STAT1,ISG15,MX1,HLA-B                                                              |
| GO:0071346 | cellular response to interferon-gamma           | 7  | 155  | 1.15 | 8.20E-05 | 9606.ENSP00000268058,9606.ENSP00000342278,9606.ENSP00000354394,9606.ENSP00000359490,9606.ENSP00000365402,9606.ENSP00000384886,9606.ENSP00000399168                                                                                                                                                                                                                                                             | PML,OAS2,STAT1,GBP4,HLA-C,IFI30,HLA-B                                                                          |
| GO:0045071 | negative regulation of viral genome replication | 5  | 52   | 1.48 | 9.65E-05 | 9606.ENSP00000233057,9606.ENSP00000253110,9606.ENSP00000325618,9606.ENSP00000368699,9606.ENSP00000381601                                                                                                                                                                                                                                                                                                       | EIF2AK2,C19orf66,PARP10,ISG15,MX1                                                                              |
| GO:0002252 | immune effector process                         | 14 | 927  | 0.67 | 1.10E-04 | 9606.ENSP00000233057,9606.ENSP00000253110,9606.ENSP00000261811,9606.ENSP00000268058,9606.ENSP00000342278,9606.ENSP00000354394,9606.ENSP00000359787,9606.ENSP00000360883,9606.ENSP00000365402,9606.ENSP00000366525,9606.ENSP00000368699,9606.ENSP00000369213,9606.ENSP00000381601,9606.ENSP00000399168                                                                                                          | EIF2AK2,C19orf66,CYSTM1,PML,OAS2,STAT1,IFI44L,IFIT3,HLA-C,FTL,ISG15,DDX58,MX1,HLA-B                            |



|            |                                            |    |      |      |          |                                                                                                                                                                                                                                                                                                                                                                                                                                                                               |                                                                                                                                      |
|------------|--------------------------------------------|----|------|------|----------|-------------------------------------------------------------------------------------------------------------------------------------------------------------------------------------------------------------------------------------------------------------------------------------------------------------------------------------------------------------------------------------------------------------------------------------------------------------------------------|--------------------------------------------------------------------------------------------------------------------------------------|
| GO:0009605 | response to external stimulus              | 21 | 2152 | 0.48 | 1.60E-04 | 9606.ENSP00000220676,9606.ENSP00000233057,9606.ENSP00000253110,9606.ENSP00000268058,9606.ENSP00000312988,9606.ENSP00000342278,9606.ENSP00000354394,9606.ENSP00000359490,9606.ENSP00000359783,9606.ENSP00000359787,9606.ENSP00000360883,9606.ENSP00000365402,9606.ENSP00000368699,9606.ENSP00000369213,9606.ENSP00000379038,9606.ENSP00000381601,9606.ENSP00000384886,9606.ENSP00000395590,9606.ENSP0000039168,9606.ENSP00000399888,9606.ENSP00000428085                       | RP1,EIF2AK2,C19orf66,PML,NFKBIB,OAS2,STAT1,GBP4,IFI44,IFI44L,IFIT3,HLA-C,ISG15,DDX58,TYMP,MX1,IFI30,IFI35,HLA-B,HMGA1,RPL30          |
| GO:0034097 | response to cytokine                       | 14 | 1035 | 0.62 | 3.40E-04 | 9606.ENSP00000233057,9606.ENSP00000253110,9606.ENSP00000259206,9606.ENSP00000268058,9606.ENSP00000342278,9606.ENSP00000354394,9606.ENSP00000359490,9606.ENSP00000360883,9606.ENSP00000365402,9606.ENSP00000368699,9606.ENSP00000381601,9606.ENSP00000384886,9606.ENSP00000395590,9606.ENSP00000399168                                                                                                                                                                         | EIF2AK2,C19orf66,IL1RN,PML,OAS2,STAT1,GBP4,IFIT3,HLA-C,ISG15,MX1,IFI30,IFI35,HLA-B                                                   |
| GO:0051704 | multi-organism process                     | 22 | 2514 | 0.43 | 4.30E-04 | 9606.ENSP00000233057,9606.ENSP00000253110,9606.ENSP00000268058,9606.ENSP00000296577,9606.ENSP00000312988,9606.ENSP00000342278,9606.ENSP00000354394,9606.ENSP00000359490,9606.ENSP00000359783,9606.ENSP00000359787,9606.ENSP00000360883,9606.ENSP00000361930,9606.ENSP00000365402,9606.ENSP00000368699,9606.ENSP00000369213,9606.ENSP00000373450,9606.ENSP00000381601,9606.ENSP00000384886,9606.ENSP00000395590,9606.ENSP00000399168,9606.ENSP00000399888,9606.ENSP00000428085 | EIF2AK2,C19orf66,PML,ABCE1,NFKBIB,OAS2,STAT1,GBP4,IFI44,IFI44L,IFIT3,YWHAB,HLA-C,ISG15,DDX58,SPAG1,MX1,IFI30,IFI35,HLA-B,HMGA1,RPL30 |
| GO:0019221 | cytokine-mediated signaling pathway        | 11 | 655  | 0.72 | 5.00E-04 | 9606.ENSP00000259206,9606.ENSP00000268058,9606.ENSP00000342278,9606.ENSP00000354394,9606.ENSP00000360883,9606.ENSP00000365402,9606.ENSP00000368699,9606.ENSP00000381601,9606.ENSP00000384886,9606.ENSP00000395590,9606.ENSP00000399168                                                                                                                                                                                                                                        | IL1RN,PML,OAS2,STAT1,IFIT3,HLA-C,ISG15,MX1,IFI30,IFI35,HLA-B                                                                         |
| GO:0002376 | immune system process                      | 21 | 2370 | 0.44 | 5.90E-04 | 9606.ENSP00000233057,9606.ENSP00000253110,9606.ENSP00000259206,9606.ENSP00000261811,9606.ENSP00000263636,9606.ENSP00000268058,9606.ENSP00000342278,9606.ENSP00000354394,9606.ENSP00000359490,9606.ENSP00000359787,9606.ENSP00000360883,9606.ENSP00000365402,9606.ENSP00000366525,9606.ENSP00000368699,9606.ENSP00000369213,9606.ENSP00000372155,9606.ENSP00000381601,9606.ENSP00000384886,9606.ENSP00000395590,9606.ENSP00000399168,9606.ENSP00000428085                      | EIF2AK2,C19orf66,IL1RN,CYSTM1,LY75,PML,OAS2,STAT1,GBP4,IFI44L,IFIT3,HLA-C,FTL,ISG15,DDX58,PSME1,MX1,IFI30,IFI35,HLA-B,RPL30          |
| GO:0016032 | viral process                              | 10 | 571  | 0.74 | 8.50E-04 | 9606.ENSP00000233057,9606.ENSP00000268058,9606.ENSP00000296577,9606.ENSP00000354394,9606.ENSP00000361930,9606.ENSP00000365402,9606.ENSP00000368699,9606.ENSP00000369213,9606.ENSP00000399168,9606.ENSP00000399888                                                                                                                                                                                                                                                             | EIF2AK2,PML,ABCE1,STAT1,YWHAB,HLA-C,ISG15,DDX58,HLA-B,HMGA1                                                                          |
| GO:0044419 | interspecies interaction between organisms | 11 | 724  | 0.67 | 1.10E-03 | 9606.ENSP00000233057,9606.ENSP00000268058,9606.ENSP00000296577,9606.ENSP00000354394,9606.ENSP00000361930,9606.ENSP00000365402,9606.ENSP00000368699,9606.ENSP00000369213,9606.ENSP00000399168,9606.ENSP00000399888,9606.ENSP00000428085                                                                                                                                                                                                                                        | EIF2AK2,PML,ABCE1,STAT1,YWHAB,HLA-C,ISG15,DDX58,HLA-B,HMGA1,RPL30                                                                    |

|            |                                                                                                                   |    |      |      |          |                                                                                                                                                                                                                                                                                                                                                                                                                                                                                                                                                                        |                                                                                                                                                                     |
|------------|-------------------------------------------------------------------------------------------------------------------|----|------|------|----------|------------------------------------------------------------------------------------------------------------------------------------------------------------------------------------------------------------------------------------------------------------------------------------------------------------------------------------------------------------------------------------------------------------------------------------------------------------------------------------------------------------------------------------------------------------------------|---------------------------------------------------------------------------------------------------------------------------------------------------------------------|
| GO:0006950 | response to stress                                                                                                | 24 | 3267 | 0.36 | 2.20E-03 | 9606. ENSP00000233057, 9606. ENSP00000253110, 9606. ENSP00000259206, 9606. ENSP00000263636, 9606. ENSP00000268058, 9606. ENSP00000305480, 9606. ENSP00000342278, 9606. ENSP00000348278, 9606. ENSP00000354394, 9606. ENSP00000358045, 9606. ENSP00000359490, 9606. ENSP00000359787, 9606. ENSP00000360883, 9606. ENSP00000365402, 9606. ENSP00000368699, 9606. ENSP00000369213, 9606. ENSP00000381601, 9606. ENSP00000384886, 9606. ENSP00000395590, 9606. ENSP00000399168, 9606. ENSP00000399888, 9606. ENSP00000428085, 9606. ENSP00000478874, 9606. ENSP00000478927 | EIF2AK2, C19orf66, IL1RN, LY75, PML, FEN1, OAS2, STK39, STAT1, ECM1, GBP4, IFI44L, IFIT3, HLA-C, ISG15, DDX58, MX1, IFI30, IFI35, HLA-B, HMGA1, RPL30, CAMK1D, YAP1 |
| GO:0043900 | regulation of multi-organism process                                                                              | 10 | 653  | 0.68 | 2.30E-03 | 9606. ENSP00000233057, 9606. ENSP00000253110, 9606. ENSP00000268058, 9606. ENSP00000296577, 9606. ENSP00000325618, 9606. ENSP00000354394, 9606. ENSP00000368699, 9606. ENSP00000369213, 9606. ENSP00000381601, 9606. ENSP00000399168                                                                                                                                                                                                                                                                                                                                   | EIF2AK2, C19orf66, PML, ABCE1, PARP10, STAT1, ISG15, DDX58, MX1, HLA-B                                                                                              |
| GO:0071345 | cellular response to cytokine stimulus                                                                            | 12 | 953  | 0.59 | 2.40E-03 | 9606. ENSP00000259206, 9606. ENSP00000268058, 9606. ENSP00000342278, 9606. ENSP00000354394, 9606. ENSP00000359490, 9606. ENSP00000360883, 9606. ENSP00000365402, 9606. ENSP00000368699, 9606. ENSP00000381601, 9606. ENSP00000384886, 9606. ENSP00000395590, 9606. ENSP00000399168                                                                                                                                                                                                                                                                                     | IL1RN, PML, OAS2, STAT1, GBP4, IFIT3, HLA-C, ISG15, MX1, IFI30, IFI35, HLA-B                                                                                        |
| GO:0002486 | antigen processing and presentation of endogenous peptide antigen via MHC class I via ER pathway, TAP-independent | 2  | 3    | 2.32 | 4.80E-03 | 9606. ENSP00000365402, 9606. ENSP00000399168                                                                                                                                                                                                                                                                                                                                                                                                                                                                                                                           | HLA-C, HLA-B                                                                                                                                                        |
| GO:0002230 | positive regulation of defense response to virus by host                                                          | 3  | 26   | 1.55 | 4.90E-03 | 9606. ENSP00000268058, 9606. ENSP00000354394, 9606. ENSP00000369213                                                                                                                                                                                                                                                                                                                                                                                                                                                                                                    | PML, STAT1, DDX58                                                                                                                                                   |
| GO:0042590 | antigen processing and presentation of exogenous peptide antigen via MHC class I                                  | 3  | 29   | 1.51 | 6.40E-03 | 9606. ENSP00000365402, 9606. ENSP00000384886, 9606. ENSP00000399168                                                                                                                                                                                                                                                                                                                                                                                                                                                                                                    | HLA-C, IFI30, HLA-B                                                                                                                                                 |
| GO:0060759 | regulation of response to cytokine stimulus                                                                       | 5  | 162  | 0.98 | 8.50E-03 | 9606. ENSP00000259206, 9606. ENSP00000296577, 9606. ENSP00000354394, 9606. ENSP00000358045, 9606. ENSP00000369213                                                                                                                                                                                                                                                                                                                                                                                                                                                      | IL1RN, ABCE1, STAT1, ECM1, DDX58                                                                                                                                    |
| GO:0001578 | microtubule bundle formation                                                                                      | 4  | 87   | 1.15 | 8.80E-03 | 9606. ENSP00000220676, 9606. ENSP00000298292, 9606. ENSP00000353785, 9606. ENSP00000373450                                                                                                                                                                                                                                                                                                                                                                                                                                                                             | RP1, DNAAF2, TPPP, SPAG1                                                                                                                                            |
| GO:0072307 | regulation of metanephric nephron tubule epithelial cell differentiation                                          | 2  | 7    | 1.95 | 1.44E-02 | 9606. ENSP00000354394, 9606. ENSP00000478927                                                                                                                                                                                                                                                                                                                                                                                                                                                                                                                           | STAT1, YAP1                                                                                                                                                         |
| GO:0002480 | antigen processing and presentation of exogenous peptide antigen via MHC class I, TAP-independent                 | 2  | 8    | 1.89 | 1.71E-02 | 9606. ENSP00000365402, 9606. ENSP00000399168                                                                                                                                                                                                                                                                                                                                                                                                                                                                                                                           | HLA-C, HLA-B                                                                                                                                                        |
| GO:0045646 | regulation of erythrocyte differentiation                                                                         | 3  | 46   | 1.31 | 1.95E-02 | 9606. ENSP00000341422, 9606. ENSP00000354394, 9606. ENSP00000368699                                                                                                                                                                                                                                                                                                                                                                                                                                                                                                    | P4HTM, STAT1, ISG15                                                                                                                                                 |
| GO:0019884 | antigen processing and presentation of exogenous antigen                                                          | 4  | 130  | 0.98 | 3.18E-02 | 9606. ENSP00000365402, 9606. ENSP00000372155, 9606. ENSP00000384886, 9606. ENSP00000399168                                                                                                                                                                                                                                                                                                                                                                                                                                                                             | HLA-C, PSME1, IFI30, HLA-B                                                                                                                                          |
| GO:0035082 | axoneme assembly                                                                                                  | 3  | 59   | 1.2  | 3.56E-02 | 9606. ENSP00000220676, 9606. ENSP00000298292, 9606. ENSP00000373450                                                                                                                                                                                                                                                                                                                                                                                                                                                                                                    | RP1, DNAAF2, SPAG1                                                                                                                                                  |

|            |                                                   |    |      |      |          |                                                                                                                                                                                                                                                                                                                                                 |                                                                                             |
|------------|---------------------------------------------------|----|------|------|----------|-------------------------------------------------------------------------------------------------------------------------------------------------------------------------------------------------------------------------------------------------------------------------------------------------------------------------------------------------|---------------------------------------------------------------------------------------------|
| GO:0002682 | regulation of immune system process               | 12 | 1391 | 0.43 | 4.82E-02 | 9606.ENSP00000233057,9606.ENSP00000268058,9606.ENSP00000296577,9606.ENSP00000341422,9606.ENSP00000354394,9606.ENSP00000358045,9606.ENSP00000365402,9606.ENSP00000368699,9606.ENSP00000369213,9606.ENSP00000399168,9606.ENSP00000478874,9606.ENSP00000478927                                                                                     | EIF2AK2,PML,ABCE1,P4HTM,STAT1,ECM1,HLA-C,ISG15,DDX58,HLA-B,CAMK1D,YAP1                      |
| GO:0071310 | cellular response to organic substance            | 16 | 2219 | 0.35 | 4.82E-02 | 9606.ENSP00000233057,9606.ENSP00000259206,9606.ENSP00000268058,9606.ENSP00000312988,9606.ENSP00000342278,9606.ENSP00000354394,9606.ENSP00000359490,9606.ENSP00000360883,9606.ENSP00000365402,9606.ENSP00000368699,9606.ENSP00000369213,9606.ENSP00000381601,9606.ENSP00000384886,9606.ENSP00000395590,9606.ENSP00000399168,9606.ENSP00000478927 | EIF2AK2,IL1RN,PML,NFKBIB,OAS2,STAT1,GBP4,IFIT3,HLA-C,ISG15,DDX58,MX1,IFI30,IFI35,HLA-B,YAP1 |
| GO:0001959 | regulation of cytokine-mediated signaling pathway | 4  | 151  | 0.92 | 4.85E-02 | 9606.ENSP00000259206,9606.ENSP00000296577,9606.ENSP00000354394,9606.ENSP00000358045                                                                                                                                                                                                                                                             | IL1RN,ABCE1,STAT1,ECM1                                                                      |

**T = 72 h (mock) IFN $\alpha$ 16 / Untreated**

**No significantly enriched GO categories**

T = 72 h (mock) IFNλ3 / Untreated

| #Term ID   | Term Description                    | Observed Gene Count | Background Gene Count | Strength | False Discovery Rate | Matching Proteins in Your Input (IDs)                                                                                                                                                                                                                                                                                                                                                                                                                                                                                  | Matching Proteins in Your Input (Labels)                                                                                                         |
|------------|-------------------------------------|---------------------|-----------------------|----------|----------------------|------------------------------------------------------------------------------------------------------------------------------------------------------------------------------------------------------------------------------------------------------------------------------------------------------------------------------------------------------------------------------------------------------------------------------------------------------------------------------------------------------------------------|--------------------------------------------------------------------------------------------------------------------------------------------------|
| GO:0060337 | type I interferon signaling pathway | 11                  | 65                    | 1.67     | 6.04E-12             | 9606.ENSP00000257570,9606.ENSP00000342278,9606.ENSP00000343023,9606.ENSP00000354394,9606.ENSP00000360883,9606.ENSP00000368699,9606.ENSP00000379873,9606.ENSP00000381601,9606.ENSP00000382707,9606.ENSP00000395590,9606.ENSP0000039168                                                                                                                                                                                                                                                                                  | OASL,OAS2,SP100,STAT1,IFIT3,ISG15,HLA-A,MX1,IFITM3,IFI35,HLA-B                                                                                   |
| GO:0009615 | response to virus                   | 15                  | 270                   | 1.18     | 4.22E-11             | 9606.ENSP00000233057,9606.ENSP00000257570,9606.ENSP00000268058,9606.ENSP00000323889,9606.ENSP00000342278,9606.ENSP00000354394,9606.ENSP00000359783,9606.ENSP00000359787,9606.ENSP00000360883,9606.ENSP00000368699,9606.ENSP00000369213,9606.ENSP00000377344,9606.ENSP00000381601,9606.ENSP00000382707,9606.ENSP00000399888                                                                                                                                                                                             | EIF2AK2,OASL,PML,TRIM25,OAS2,STAT1,IFI44,IFI44L,IFIT3,ISG15,DDX58,DDX60,MX1,IFITM3,HMGA1                                                         |
| GO:0051607 | defense response to virus           | 13                  | 181                   | 1.3      | 8.29E-11             | 9606.ENSP00000233057,9606.ENSP00000257570,9606.ENSP00000268058,9606.ENSP00000323889,9606.ENSP00000342278,9606.ENSP00000354394,9606.ENSP00000359787,9606.ENSP00000360883,9606.ENSP00000368699,9606.ENSP00000369213,9606.ENSP0000037344,9606.ENSP00000381601,9606.ENSP00000382707                                                                                                                                                                                                                                        | EIF2AK2,OASL,PML,TRIM25,OAS2,STAT1,IFI44L,IFIT3,ISG15,DDX58,DDX60,MX1,IFITM3                                                                     |
| GO:0045087 | innate immune response              | 20                  | 676                   | 0.91     | 1.06E-10             | 9606.ENSP00000233057,9606.ENSP00000243253,9606.ENSP00000257570,9606.ENSP00000268058,9606.ENSP00000323889,9606.ENSP00000342278,9606.ENSP00000343023,9606.ENSP00000354394,9606.ENSP00000357722,9606.ENSP00000359490,9606.ENSP00000360883,9606.ENSP00000368699,9606.ENSP00000369213,9606.ENSP00000377344,9606.ENSP00000378217,9606.ENSP00000379873,9606.ENSP00000381601,9606.ENSP00000382707,9606.ENSP00000395590,9606.ENSP00000399168                                                                                    | EIF2AK2,SEC61A1,OASL,PML,TRIM25,OAS2,SP100,STAT1,S100A8,GBP4,IFI35,ISG15,DDX58,DDX60,PRKCD,HLA-A,MX1,IFITM3,IFI35,HLA-B                          |
| GO:0051707 | response to other organism          | 24                  | 1173                  | 0.75     | 5.43E-10             | 9606.ENSP00000233057,9606.ENSP00000243253,9606.ENSP00000257570,9606.ENSP00000264346,9606.ENSP00000268058,9606.ENSP00000323889,9606.ENSP00000342278,9606.ENSP00000343023,9606.ENSP00000354394,9606.ENSP00000357722,9606.ENSP00000359490,9606.ENSP00000359783,9606.ENSP00000359787,9606.ENSP00000360883,9606.ENSP00000368699,9606.ENSP00000369213,9606.ENSP0000037344,9606.ENSP00000378217,9606.ENSP00000379873,9606.ENSP00000381601,9606.ENSP00000382707,9606.ENSP00000395590,9606.ENSP00000399168,9606.ENSP00000399888 | EIF2AK2,SEC61A1,OASL,HERC6,PML,TRIM25,OAS2,SP100,STAT1,S100A8,GBP4,IFI44,IFI44L,IFIT3,ISG15,DDX58,DDX60,PRKCD,HLA-A,MX1,IFITM3,IFI35,HLA-B,HMGA1 |
| GO:0098542 | defense response to other organism  | 21                  | 859                   | 0.83     | 5.67E-10             | 9606.ENSP00000233057,9606.ENSP00000243253,9606.ENSP00000257570,9606.ENSP00000268058,9606.ENSP00000323889,9606.ENSP00000342278,9606.ENSP00000343023,9606.ENSP00000354394,9606.ENSP00000357722,9606.ENSP00000359490,9606.ENSP00000359787,9606.ENSP00000360883,9606.ENSP00000368699,9606.ENSP00000369213,9606.ENSP0000037344,9606.ENSP00000378217,9606.ENSP00000379873,9606.ENSP00000381601,9606.ENSP00000382707,9606.ENSP00000395590,9606.ENSP00000399168                                                                | EIF2AK2,SEC61A1,OASL,PML,TRIM25,OAS2,SP100,STAT1,S100A8,GBP4,IFI44L,IFIT3,ISG15,DDX58,DDX60,PRKCD,HLA-A,MX1,IFITM3,IFI35,HLA-B                   |

|            |                                               |    |      |      |          |                                                                                                                                                                                                                                                                                                                                                                                                                                                                                                                                                                                               |                                                                                                                                                                             |
|------------|-----------------------------------------------|----|------|------|----------|-----------------------------------------------------------------------------------------------------------------------------------------------------------------------------------------------------------------------------------------------------------------------------------------------------------------------------------------------------------------------------------------------------------------------------------------------------------------------------------------------------------------------------------------------------------------------------------------------|-----------------------------------------------------------------------------------------------------------------------------------------------------------------------------|
| GO:0034341 | response to interferon-gamma                  | 12 | 176  | 1.27 | 6.74E-10 | 9606. ENSP00000243253, 9606. ENSP00000257570, 9606. ENSP00000268058, 9606. ENSP00000323889, 9606. ENSP00000342278, 9606. ENSP00000343023, 9606. ENSP00000354394, 9606. ENSP00000359490, 9606. ENSP00000378217, 9606. ENSP00000379873, 9606. ENSP00000382707, 9606. ENSP00000399168                                                                                                                                                                                                                                                                                                            | SEC61A1, OASL, PML, TRIM25, OAS2, SP100, STAT1, GBP4, PRKCD, HLA-A, IFITM3, HLA-B                                                                                           |
| GO:0048525 | negative regulation of viral process          | 10 | 93   | 1.47 | 6.74E-10 | 9606. ENSP00000233057, 9606. ENSP00000257570, 9606. ENSP00000268058, 9606. ENSP00000323889, 9606. ENSP00000325618, 9606. ENSP00000343023, 9606. ENSP00000354394, 9606. ENSP00000368699, 9606. ENSP00000381601, 9606. ENSP00000382707                                                                                                                                                                                                                                                                                                                                                          | EIF2AK2, OASL, PML, TRIM25, PARP10, SP100, STAT1, ISG15, MX1, IFITM3                                                                                                        |
| GO:0060333 | interferon-gamma-mediated signaling pathway   | 9  | 69   | 1.56 | 1.49E-09 | 9606. ENSP00000257570, 9606. ENSP00000268058, 9606. ENSP00000323889, 9606. ENSP00000342278, 9606. ENSP00000343023, 9606. ENSP00000354394, 9606. ENSP00000378217, 9606. ENSP00000379873, 9606. ENSP00000399168                                                                                                                                                                                                                                                                                                                                                                                 | OASL, PML, TRIM25, OAS2, SP100, STAT1, PRKCD, HLA-A, HLA-B                                                                                                                  |
| GO:0043901 | negative regulation of multi-organism process | 12 | 212  | 1.19 | 3.78E-09 | 9606. ENSP00000233057, 9606. ENSP00000257570, 9606. ENSP00000268058, 9606. ENSP00000323889, 9606. ENSP00000325618, 9606. ENSP00000343023, 9606. ENSP00000354394, 9606. ENSP00000368699, 9606. ENSP00000379873, 9606. ENSP00000381601, 9606. ENSP00000382707, 9606. ENSP00000399168                                                                                                                                                                                                                                                                                                            | EIF2AK2, OASL, PML, TRIM25, PARP10, SP100, STAT1, ISG15, HLA-A, MX1, IFITM3, HLA-B                                                                                          |
| GO:0006952 | defense response                              | 23 | 1234 | 0.71 | 5.37E-09 | 9606. ENSP00000233057, 9606. ENSP00000243253, 9606. ENSP00000249066, 9606. ENSP00000257570, 9606. ENSP00000259206, 9606. ENSP00000268058, 9606. ENSP00000323889, 9606. ENSP00000342278, 9606. ENSP00000343023, 9606. ENSP00000354394, 9606. ENSP00000357722, 9606. ENSP00000359490, 9606. ENSP00000359787, 9606. ENSP00000360883, 9606. ENSP00000368699, 9606. ENSP00000369213, 9606. ENSP00000377344, 9606. ENSP00000378217, 9606. ENSP00000379873, 9606. ENSP00000381601, 9606. ENSP00000382707, 9606. ENSP00000395590, 9606. ENSP00000399168                                               | EIF2AK2, SEC61A1, APOL2, OASL, IL1RN, PML, TRIM25, OAS2, SP100, STAT1, S100A8, GBP4, IFI44L, IFIT3, ISG15, DDX58, DDX60, PRKCD, HLA-A, MX1, IFITM3, IFI35, HLA-B            |
| GO:0002252 | immune effector process                       | 20 | 927  | 0.77 | 1.07E-08 | 9606. ENSP00000233057, 9606. ENSP00000257570, 9606. ENSP00000263946, 9606. ENSP00000268058, 9606. ENSP00000323889, 9606. ENSP00000342278, 9606. ENSP00000349687, 9606. ENSP00000354394, 9606. ENSP00000357722, 9606. ENSP00000359787, 9606. ENSP00000360883, 9606. ENSP00000368699, 9606. ENSP00000369213, 9606. ENSP00000377344, 9606. ENSP00000378217, 9606. ENSP00000379873, 9606. ENSP00000381601, 9606. ENSP00000382707, 9606. ENSP00000399168, 9606. ENSP00000408411                                                                                                                    | EIF2AK2, OASL, PKP1, PML, TRIM25, OAS2, GM2A, STAT1, S100A8, IFI44L, IFIT3, ISG15, DDX58, DDX60, PRKCD, HLA-A, MX1, IFITM3, HLA-B, LAMP2                                    |
| GO:0006955 | immune response                               | 25 | 1560 | 0.65 | 1.24E-08 | 9606. ENSP00000233057, 9606. ENSP00000243253, 9606. ENSP00000257570, 9606. ENSP00000259206, 9606. ENSP00000263946, 9606. ENSP00000268058, 9606. ENSP00000323889, 9606. ENSP00000342278, 9606. ENSP00000343023, 9606. ENSP00000349687, 9606. ENSP00000354394, 9606. ENSP00000357722, 9606. ENSP00000359490, 9606. ENSP00000360883, 9606. ENSP00000368699, 9606. ENSP00000369213, 9606. ENSP00000377344, 9606. ENSP00000378217, 9606. ENSP00000379873, 9606. ENSP00000381601, 9606. ENSP00000382707, 9606. ENSP00000395590, 9606. ENSP00000399168, 9606. ENSP00000404833, 9606. ENSP00000408411 | EIF2AK2, SEC61A1, OASL, IL1RN, PKP1, PML, TRIM25, OAS2, SP100, GM2A, STAT1, S100A8, GBP4, IFIT3, ISG15, DDX58, DDX60, PRKCD, HLA-A, MX1, IFITM3, IFI35, HLA-B, TAPBP, LAMP2 |

|            |                                         |    |      |      |          |                                                                                                                                                                                                                                                                                                                                                                                                                                                                                                                                                                                                                                                                                                                                         |                                                                                                                                                                                                                          |
|------------|-----------------------------------------|----|------|------|----------|-----------------------------------------------------------------------------------------------------------------------------------------------------------------------------------------------------------------------------------------------------------------------------------------------------------------------------------------------------------------------------------------------------------------------------------------------------------------------------------------------------------------------------------------------------------------------------------------------------------------------------------------------------------------------------------------------------------------------------------------|--------------------------------------------------------------------------------------------------------------------------------------------------------------------------------------------------------------------------|
| GO:0009605 | response to external stimulus           | 29 | 2152 | 0.57 | 1.27E-08 | 9606. ENSP00000233057, 9606. ENSP00000243253, 9606. ENSP00000257570, 9606. ENSP00000264108, 9606. ENSP00000264346, 9606. ENSP00000268058, 9606. ENSP00000309539, 9606. ENSP00000323889, 9606. ENSP00000342278, 9606. ENSP00000343023, 9606. ENSP00000354394, 9606. ENSP00000357722, 9606. ENSP00000359490, 9606. ENSP00000359783, 9606. ENSP00000359787, 9606. ENSP00000360883, 9606. ENSP00000368699, 9606. ENSP00000369213, 9606. ENSP00000377284, 9606. ENSP00000377344, 9606. ENSP00000378217, 9606. ENSP00000379038, 9606. ENSP00000379873, 9606. ENSP00000381601, 9606. ENSP00000382707, 9606. ENSP00000395590, 9606. ENSP00000399168, 9606. ENSP00000399888, 9606. ENSP00000408411                                               | EIF2AK2, SEC61A1, OASL, HAT1, HERC6, PML, DPYSL2, TRIM25, OAS2, SP100, STAT1, S100A8, GBP4, IFI44, IFI44L, IFIT3, ISG15, DDX58, FOLR1, DDX60, PRKCD, TYMP, HLA-A, MX1, IFITM3, IFI35, HLA-B, HMGA1, LAMP2                |
| GO:0043900 | regulation of multi-organism process    | 17 | 653  | 0.86 | 1.83E-08 | 9606. ENSP00000233057, 9606. ENSP00000257570, 9606. ENSP00000268058, 9606. ENSP00000296577, 9606. ENSP00000323889, 9606. ENSP00000325618, 9606. ENSP00000343023, 9606. ENSP00000354394, 9606. ENSP00000357722, 9606. ENSP00000368699, 9606. ENSP00000369213, 9606. ENSP00000377344, 9606. ENSP00000378217, 9606. ENSP00000379873, 9606. ENSP00000381601, 9606. ENSP00000382707, 9606. ENSP00000399168                                                                                                                                                                                                                                                                                                                                   | EIF2AK2, OASL, PML, ABCE1, TRIM25, PARP10, SP100, STAT1, S100A8, ISG15, DDX58, DDX60, PRKCD, HLA-A, MX1, IFITM3, HLA-B                                                                                                   |
| GO:0051704 | multi-organism process                  | 31 | 2514 | 0.53 | 1.83E-08 | 9606. ENSP00000233057, 9606. ENSP00000243253, 9606. ENSP00000244061, 9606. ENSP00000249066, 9606. ENSP00000257570, 9606. ENSP00000264346, 9606. ENSP00000268058, 9606. ENSP00000270586, 9606. ENSP00000296577, 9606. ENSP00000323889, 9606. ENSP00000342278, 9606. ENSP00000343023, 9606. ENSP00000354394, 9606. ENSP00000357722, 9606. ENSP00000359490, 9606. ENSP00000359783, 9606. ENSP00000359787, 9606. ENSP00000360883, 9606. ENSP00000363993, 9606. ENSP00000364119, 9606. ENSP00000368699, 9606. ENSP00000369213, 9606. ENSP00000371958, 9606. ENSP00000377344, 9606. ENSP00000378217, 9606. ENSP00000379873, 9606. ENSP00000381601, 9606. ENSP00000382707, 9606. ENSP00000395590, 9606. ENSP00000399168, 9606. ENSP00000399888 | EIF2AK2, SEC61A1, RNF114, APOL2, OASL, HERC6, PML, PSMB6, ABCE1, TRIM25, OAS2, SP100, STAT1, S100A8, GBP4, IFI44, IFI44L, IFIT3, PSMB9, EIF2S2, ISG15, DDX58, CD9, DDX60, PRKCD, HLA-A, MX1, IFITM3, IFI35, HLA-B, HMGA1 |
| GO:0071346 | cellular response to interferon-gamma   | 10 | 155  | 1.25 | 3.90E-08 | 9606. ENSP00000257570, 9606. ENSP00000268058, 9606. ENSP00000323889, 9606. ENSP00000342278, 9606. ENSP00000343023, 9606. ENSP00000354394, 9606. ENSP00000359490, 9606. ENSP00000378217, 9606. ENSP00000379873, 9606. ENSP00000399168                                                                                                                                                                                                                                                                                                                                                                                                                                                                                                    | OASL, PML, TRIM25, OAS2, SP100, STAT1, GBP4, PRKCD, HLA-A, HLA-B                                                                                                                                                         |
| GO:1903901 | negative regulation of viral life cycle | 8  | 77   | 1.46 | 7.05E-08 | 9606. ENSP00000233057, 9606. ENSP00000257570, 9606. ENSP00000268058, 9606. ENSP00000323889, 9606. ENSP00000325618, 9606. ENSP00000368699, 9606. ENSP00000381601, 9606. ENSP00000382707                                                                                                                                                                                                                                                                                                                                                                                                                                                                                                                                                  | EIF2AK2, OASL, PML, TRIM25, PARP10, ISG15, MX1, IFITM3                                                                                                                                                                   |
| GO:0002376 | immune system process                   | 29 | 2370 | 0.53 | 9.67E-08 | 9606. ENSP00000233057, 9606. ENSP00000243253, 9606. ENSP00000257570, 9606. ENSP00000259206, 9606. ENSP00000263946, 9606. ENSP00000264346, 9606. ENSP00000268058, 9606. ENSP00000323889, 9606. ENSP00000342278, 9606. ENSP00000343023, 9606. ENSP00000349687, 9606. ENSP00000354394, 9606. ENSP00000357722, 9606. ENSP00000359490, 9606. ENSP00000359787, 9606. ENSP00000360883, 9606. ENSP00000363993, 9606. ENSP00000368699, 9606. ENSP00000369213, 9606. ENSP00000372155, 9606. ENSP00000377344, 9606. ENSP00000378217, 9606. ENSP00000379873, 9606. ENSP00000381601, 9606. ENSP00000382707, 9606. ENSP00000395590, 9606. ENSP00000399168, 9606. ENSP00000404833, 9606. ENSP00000408411                                               | EIF2AK2, SEC61A1, OASL, IL1RN, PKP1, HERC6, PML, TRIM25, OAS2, SP100, GM2A, STAT1, S100A8, GBP4, IFI44L, IFIT3, PSMB9, ISG15, DDX58, PSME1, DDX60, PRKCD, HLA-A, MX1, IFITM3, IFI35, HLA-B, TAPBP, LAMP2                 |

|            |                                                                                   |    |      |      |          |                                                                                                                                                                                                                                                                                                                                                                                                                                                                                                                                                                                                                                                      |                                                                                                                                                                                     |
|------------|-----------------------------------------------------------------------------------|----|------|------|----------|------------------------------------------------------------------------------------------------------------------------------------------------------------------------------------------------------------------------------------------------------------------------------------------------------------------------------------------------------------------------------------------------------------------------------------------------------------------------------------------------------------------------------------------------------------------------------------------------------------------------------------------------------|-------------------------------------------------------------------------------------------------------------------------------------------------------------------------------------|
| GO:0019221 | cytokine-mediated signaling pathway                                               | 15 | 655  | 0.8  | 1.05E-06 | 9606.ENSP00000257570,9606.ENSP00000259206,9606.ENSP00000268058,9606.ENSP00000323889,9606.ENSP00000342278,9606.ENSP00000343023,9606.ENSP00000354394,9606.ENSP00000360883,9606.ENSP00000368699,9606.ENSP00000378217,9606.ENSP00000379873,9606.ENSP00000381601,9606.ENSP00000382707,9606.ENSP00000395590,9606.ENSP00000399168                                                                                                                                                                                                                                                                                                                           | OASL,IL1RN,PML,TRIM25,OAS2,SP100,STAT1,IFIT3,ISG15,PRKC D,HLA-A,MX1,IFITM3,IFI35,HLA-B                                                                                              |
| GO:0034097 | response to cytokine                                                              | 18 | 1035 | 0.68 | 1.85E-06 | 9606.ENSP00000233057,9606.ENSP00000243253,9606.ENSP00000257570,9606.ENSP00000259206,9606.ENSP00000268058,9606.ENSP00000323889,9606.ENSP00000342278,9606.ENSP00000343023,9606.ENSP00000354394,9606.ENSP00000359490,9606.ENSP00000360883,9606.ENSP00000368699,9606.ENSP00000378217,9606.ENSP00000379873,9606.ENSP00000381601,9606.ENSP00000382707,9606.ENSP00000395590,9606.ENSP00000399168                                                                                                                                                                                                                                                            | EIF2AK2,SEC61A1,OASL,IL1RN,PML,TRIM25,OAS2,SP100,STAT 1,GBP4,IFIT3,ISG15,PRKCD,HLA-A,MX1,IFITM3,IFI35,HLA-B                                                                         |
| GO:0045071 | negative regulation of viral genome replication                                   | 6  | 52   | 1.5  | 4.48E-06 | 9606.ENSP00000233057,9606.ENSP00000257570,9606.ENSP00000325618,9606.ENSP00000368699,9606.ENSP00000381601,9606.ENSP00000382707                                                                                                                                                                                                                                                                                                                                                                                                                                                                                                                        | EIF2AK2,OASL,PARP10,ISG15,MX1,IFITM3                                                                                                                                                |
| GO:0016032 | viral process                                                                     | 13 | 571  | 0.8  | 1.03E-05 | 9606.ENSP00000233057,9606.ENSP00000268058,9606.ENSP00000270586,9606.ENSP00000296577,9606.ENSP00000323889,9606.ENSP00000343023,9606.ENSP00000354394,9606.ENSP00000363993,9606.ENSP00000368699,9606.ENSP00000369213,9606.ENSP00000379873,9606.ENSP00000399168,9606.ENSP00000399888                                                                                                                                                                                                                                                                                                                                                                     | EIF2AK2,PML,PSMB6,ABCE1,TRIM25,SP100,STAT1,PSMB9,ISG 15,DDX58,HLA-A,HLA-B,HMGA1                                                                                                     |
| GO:0071345 | cellular response to cytokine stimulus                                            | 16 | 953  | 0.67 | 1.81E-05 | 9606.ENSP00000257570,9606.ENSP00000259206,9606.ENSP00000268058,9606.ENSP00000323889,9606.ENSP00000342278,9606.ENSP00000343023,9606.ENSP00000354394,9606.ENSP00000359490,9606.ENSP00000360883,9606.ENSP00000368699,9606.ENSP00000378217,9606.ENSP00000379873,9606.ENSP00000381601,9606.ENSP00000382707,9606.ENSP00000395590,9606.ENSP00000399168                                                                                                                                                                                                                                                                                                      | OASL,IL1RN,PML,TRIM25,OAS2,SP100,STAT1,GBP4,IFIT3,ISG1 5,PRKCD,HLA-A,MX1,IFITM3,IFI35,HLA-B                                                                                         |
| GO:0006950 | response to stress                                                                | 30 | 3267 | 0.4  | 2.38E-05 | 9606.ENSP00000216479,9606.ENSP00000233057,9606.ENSP00000243253,9606.ENSP00000249066,9606.ENSP00000257570,9606.ENSP00000259206,9606.ENSP00000268058,9606.ENSP00000287156,9606.ENSP00000323889,9606.ENSP0000033266,9606.ENSP00000342278,9606.ENSP00000343023,9606.ENSP00000354394,9606.ENSP00000357722,9606.ENSP00000359490,9606.ENSP00000359787,9606.ENSP00000360883,9606.ENSP00000368699,9606.ENSP00000369213,9606.ENSP00000371958,9606.ENSP00000377284,9606.ENSP00000377344,9606.ENSP00000378217,9606.ENSP00000379873,9606.ENSP00000381601,9606.ENSP00000382707,9606.ENSP00000395590,9606.ENSP00000399168,9606.ENSP00000399888,9606.ENSP00000408411 | AHSA1,EIF2AK2,SEC61A1,APOL2,OASL,IL1RN,PML,UBE2L6,TRIM25,UBA7,OAS2,SP100,STAT1,S100A8,GBP4,IFI44L,IFIT3,ISG1 5,DDX58,CD9,FOLR1,DDX60,PRKCD,HLA-A,MX1,IFITM3,IFI35,HLA-B,HMGA1,LAMP2 |
| GO:0032480 | negative regulation of type I interferon production                               | 5  | 43   | 1.51 | 4.94E-05 | 9606.ENSP00000287156,9606.ENSP00000323889,9606.ENSP00000333266,9606.ENSP00000368699,9606.ENSP00000369213                                                                                                                                                                                                                                                                                                                                                                                                                                                                                                                                             | UBE2L6,TRIM25,UBA7,ISG15,DDX58                                                                                                                                                      |
| GO:0032020 | ISG15-protein conjugation                                                         | 3  | 6    | 2.14 | 2.10E-04 | 9606.ENSP00000287156,9606.ENSP00000333266,9606.ENSP00000368699                                                                                                                                                                                                                                                                                                                                                                                                                                                                                                                                                                                       | UBE2L6,UBA7,ISG15                                                                                                                                                                   |
| GO:0032479 | regulation of type I interferon production                                        | 6  | 112  | 1.17 | 2.30E-04 | 9606.ENSP00000287156,9606.ENSP00000323889,9606.ENSP00000333266,9606.ENSP00000354394,9606.ENSP00000368699,9606.ENSP00000369213                                                                                                                                                                                                                                                                                                                                                                                                                                                                                                                        | UBE2L6,TRIM25,UBA7,STAT1,ISG15,DDX58                                                                                                                                                |
| GO:0019885 | antigen processing and presentation of endogenous peptide antigen via MHC class I | 3  | 9    | 1.96 | 5.20E-04 | 9606.ENSP00000379873,9606.ENSP00000399168,9606.ENSP00000404833                                                                                                                                                                                                                                                                                                                                                                                                                                                                                                                                                                                       | HLA-A,HLA-B,TAPBP                                                                                                                                                                   |



|            |                                           |    |      |      |          |                                                                                                                                                                                                                                                                                                                                                                                                                                                                                                                         |                                                                                                                                              |
|------------|-------------------------------------------|----|------|------|----------|-------------------------------------------------------------------------------------------------------------------------------------------------------------------------------------------------------------------------------------------------------------------------------------------------------------------------------------------------------------------------------------------------------------------------------------------------------------------------------------------------------------------------|----------------------------------------------------------------------------------------------------------------------------------------------|
| GO:0001817 | regulation of cytokine production         | 11 | 615  | 0.69 | 7.20E-04 | 9606.ENSP00000233057,9606.ENSP00000268058,9606.ENSP00000287156,9606.ENSP00000323889,9606.ENSP00000333266,9606.ENSP00000354394,9606.ENSP00000368699,9606.ENSP00000369213,9606.ENSP00000377344,9606.ENSP00000379873,9606.ENSP0000039168                                                                                                                                                                                                                                                                                   | EIF2AK2,PML,UBE2L6,TRIM25,UBA7,STAT1,ISG15,DDX58,DDX60,HLA-A,HLA-B                                                                           |
| GO:0002831 | regulation of response to biotic stimulus | 9  | 426  | 0.77 | 1.30E-03 | 9606.ENSP00000268058,9606.ENSP00000296577,9606.ENSP00000354394,9606.ENSP00000357722,9606.ENSP00000369213,9606.ENSP00000377344,9606.ENSP00000378217,9606.ENSP00000379873,9606.ENSP00000399168                                                                                                                                                                                                                                                                                                                            | PML,ABCE1,STAT1,S100A8,DDX58,DDX60,PRKCD,HLA-A,HLA-B                                                                                         |
| GO:0010033 | response to organic substance             | 24 | 2815 | 0.37 | 1.60E-03 | 9606.ENSP00000233057,9606.ENSP00000243253,9606.ENSP00000257570,9606.ENSP00000259206,9606.ENSP00000268058,9606.ENSP00000323889,9606.ENSP00000325677,9606.ENSP00000342278,9606.ENSP00000343023,9606.ENSP00000354394,9606.ENSP00000357722,9606.ENSP00000359490,9606.ENSP00000360883,9606.ENSP00000368678,9606.ENSP00000368699,9606.ENSP00000369213,9606.ENSP00000371958,9606.ENSP00000377284,9606.ENSP00000378217,9606.ENSP00000379873,9606.ENSP00000381601,9606.ENSP00000382707,9606.ENSP00000395590,9606.ENSP00000399168 | EIF2AK2,SEC61A1,OASL,IL1RN,PML,TRIM25,RNF40,OAS2,SP100,STAT1,S100A8,GBP4,IFIT3,AGRN,ISG15,DDX58,CD9,FOLR1,PRKCD,HLA-A,MX1,IFITM3,IFI35,HLA-B |
| GO:0044257 | cellular protein catabolic process        | 10 | 562  | 0.69 | 1.70E-03 | 9606.ENSP00000268058,9606.ENSP00000270586,9606.ENSP00000287156,9606.ENSP00000323889,9606.ENSP00000325677,9606.ENSP00000333266,9606.ENSP00000363993,9606.ENSP00000368699,9606.ENSP00000408411,9606.ENSP00000464087                                                                                                                                                                                                                                                                                                       | PML,PSMB6,UBE2L6,TRIM25,RNF40,UBA7,PSMB9,ISG15,LAMP2,RNF213                                                                                  |
| GO:1901565 | organonitrogen compound catabolic process | 13 | 958  | 0.57 | 1.80E-03 | 9606.ENSP00000268058,9606.ENSP00000270586,9606.ENSP00000287156,9606.ENSP00000323889,9606.ENSP00000325677,9606.ENSP00000333266,9606.ENSP00000349687,9606.ENSP00000363993,9606.ENSP00000368678,9606.ENSP00000368699,9606.ENSP00000379038,9606.ENSP00000408411,9606.ENSP00000464087                                                                                                                                                                                                                                        | PML,PSMB6,UBE2L6,TRIM25,RNF40,UBA7,GM2A,PSMB9,AGRN,ISG15,TYMP,LAMP2,RNF213                                                                   |
| GO:0009057 | macromolecule catabolic process           | 13 | 970  | 0.57 | 2.00E-03 | 9606.ENSP00000268058,9606.ENSP00000270586,9606.ENSP00000287156,9606.ENSP00000323889,9606.ENSP00000325677,9606.ENSP00000333266,9606.ENSP00000342278,9606.ENSP00000363993,9606.ENSP00000368678,9606.ENSP00000368699,9606.ENSP00000408411,9606.ENSP00000464087,9606.ENSP00000464342                                                                                                                                                                                                                                        | PML,PSMB6,UBE2L6,TRIM25,RNF40,UBA7,OAS2,PSMB9,AGRN,ISG15,LAMP2,RNF213,RPL36                                                                  |
| GO:0044265 | cellular macromolecule catabolic process  | 12 | 842  | 0.59 | 2.20E-03 | 9606.ENSP00000268058,9606.ENSP00000270586,9606.ENSP00000287156,9606.ENSP00000323889,9606.ENSP00000325677,9606.ENSP00000333266,9606.ENSP00000342278,9606.ENSP00000363993,9606.ENSP00000368699,9606.ENSP00000408411,9606.ENSP00000464087,9606.ENSP00000464342                                                                                                                                                                                                                                                             | PML,PSMB6,UBE2L6,TRIM25,RNF40,UBA7,OAS2,PSMB9,ISG15,LAMP2,RNF213,RPL36                                                                       |
| GO:0045088 | regulation of innate immune response      | 8  | 361  | 0.79 | 2.30E-03 | 9606.ENSP00000296577,9606.ENSP00000354394,9606.ENSP00000357722,9606.ENSP00000369213,9606.ENSP00000377344,9606.ENSP00000378217,9606.ENSP00000379873,9606.ENSP00000399168                                                                                                                                                                                                                                                                                                                                                 | ABCE1,STAT1,S100A8,DDX58,DDX60,PRKCD,HLA-A,HLA-B                                                                                             |

|            |                                           |    |      |      |          |                                                                                                                                                                                                                                                                                                                                                                                                                                                                                                                                                                                                                                                                                                                                                                                                                                                                                                                                                                                                                                                                           |                                                                                                                                                                                                                                                                                                                      |
|------------|-------------------------------------------|----|------|------|----------|---------------------------------------------------------------------------------------------------------------------------------------------------------------------------------------------------------------------------------------------------------------------------------------------------------------------------------------------------------------------------------------------------------------------------------------------------------------------------------------------------------------------------------------------------------------------------------------------------------------------------------------------------------------------------------------------------------------------------------------------------------------------------------------------------------------------------------------------------------------------------------------------------------------------------------------------------------------------------------------------------------------------------------------------------------------------------|----------------------------------------------------------------------------------------------------------------------------------------------------------------------------------------------------------------------------------------------------------------------------------------------------------------------|
| GO:1901564 | organonitrogen compound metabolic process | 35 | 5281 | 0.26 | 2.30E-03 | 9606. ENSP00000226299, 9606. ENSP00000233057, 9606. ENSP00000244061, 9606. ENSP00000247665, 9606. ENSP00000249066, 9606. ENSP00000264108, 9606. ENSP00000264346, 9606. ENSP00000268058, 9606. ENSP00000270586, 9606. ENSP00000287156, 9606. ENSP00000296577, 9606. ENSP00000323889, 9606. ENSP00000325618, 9606. ENSP00000325677, 9606. ENSP00000327436, 9606. ENSP00000332666, 9606. ENSP00000347495, 9606. ENSP00000349687, 9606. ENSP00000355330, 9606. ENSP00000357722, 9606. ENSP00000363993, 9606. ENSP00000364119, 9606. ENSP00000367923, 9606. ENSP00000368678, 9606. ENSP00000368699, 9606. ENSP00000369213, 9606. ENSP00000372155, 9606. ENSP00000377284, 9606. ENSP00000378217, 9606. ENSP00000379038, 9606. ENSP00000379873, 9606. ENSP00000404833, 9606. ENSP00000408411, 9606. ENSP00000464087, 9606. ENSP00000464342                                                                                                                                                                                                                                       | LAP3, EIF2AK2, RNF114, PHPT1, APOL2, HAT1, HERC6, PML, PSMB6, UBE2L6, ABCE1, TRIM25, PARP10, RNF40, SETD3, UBA7, WARS, GM2A, TGM2, S100A8, PSMB9, EIF2S2, SUCLA2, AGRN, ISG15, DDX58, PSME1, FOLR1, PRKCD, TYMP, HLA-A, TAPBP, LAMP2, RNF213, RPL36                                                                  |
| GO:0050896 | response to stimulus                      | 45 | 7824 | 0.2  | 2.40E-03 | 9606. ENSP00000216479, 9606. ENSP00000233057, 9606. ENSP00000243253, 9606. ENSP00000249066, 9606. ENSP00000257570, 9606. ENSP00000259206, 9606. ENSP00000263946, 9606. ENSP00000264108, 9606. ENSP00000264346, 9606. ENSP00000268058, 9606. ENSP00000287156, 9606. ENSP00000302037, 9606. ENSP00000309539, 9606. ENSP00000323889, 9606. ENSP00000325677, 9606. ENSP00000332666, 9606. ENSP00000337641, 9606. ENSP00000342278, 9606. ENSP00000343023, 9606. ENSP00000349687, 9606. ENSP00000354394, 9606. ENSP00000355330, 9606. ENSP00000357722, 9606. ENSP00000359490, 9606. ENSP00000359783, 9606. ENSP00000359787, 9606. ENSP00000360883, 9606. ENSP00000364585, 9606. ENSP00000368678, 9606. ENSP00000368699, 9606. ENSP00000369213, 9606. ENSP00000371958, 9606. ENSP00000377284, 9606. ENSP00000377344, 9606. ENSP00000378217, 9606. ENSP00000379038, 9606. ENSP00000379873, 9606. ENSP00000381601, 9606. ENSP00000382707, 9606. ENSP00000395590, 9606. ENSP00000399168, 9606. ENSP00000399888, 9606. ENSP00000404833, 9606. ENSP00000408411, 9606. ENSP00000482445 | AHSA1, EIF2AK2, SEC61A1, APOL2, OASL, IL1RN, PKP1, HAT1, HERC6, PML, UBE2L6, MFF, DPYSL2, TRIM25, RNF40, UBA7, PPP2R5E, OAS2, SP100, GM2A, STAT1, TGM2, S100A8, GBP4, IFI44, IFI44L, IFIT3, RCC2, AGRN, ISG15, DDX58, CD9, FOLR1, DDX60, PRKCD, TYMP, HLA-A, MX1, IFITM3, IFI35, HLA-B, HMGA1, TAPBP, LAMP2, FAM213A |
| GO:0044267 | cellular protein metabolic process        | 27 | 3603 | 0.31 | 3.40E-03 | 9606. ENSP00000233057, 9606. ENSP00000244061, 9606. ENSP00000247665, 9606. ENSP00000264108, 9606. ENSP00000264346, 9606. ENSP00000268058, 9606. ENSP00000270586, 9606. ENSP00000287156, 9606. ENSP00000296577, 9606. ENSP00000323889, 9606. ENSP00000325618, 9606. ENSP00000325677, 9606. ENSP00000327436, 9606. ENSP00000332666, 9606. ENSP00000347495, 9606. ENSP00000355330, 9606. ENSP00000357722, 9606. ENSP00000363993, 9606. ENSP00000364119, 9606. ENSP00000368699, 9606. ENSP00000369213, 9606. ENSP00000372155, 9606. ENSP00000378217, 9606. ENSP00000379873, 9606. ENSP00000408411, 9606. ENSP00000464087, 9606. ENSP00000464342                                                                                                                                                                                                                                                                                                                                                                                                                               | EIF2AK2, RNF114, PHPT1, HAT1, HERC6, PML, PSMB6, UBE2L6, ABCE1, TRIM25, PARP10, RNF40, SETD3, UBA7, WARS, TGM2, S100A8, PSMB9, EIF2S2, ISG15, DDX58, PSME1, PRKCD, HLA-A, LAMP2, RNF213, RPL36                                                                                                                       |
| GO:0071310 | cellular response to organic substance    | 20 | 2219 | 0.4  | 3.40E-03 | 9606. ENSP00000233057, 9606. ENSP00000257570, 9606. ENSP00000259206, 9606. ENSP00000268058, 9606. ENSP00000323889, 9606. ENSP00000342278, 9606. ENSP00000343023, 9606. ENSP00000354394, 9606. ENSP00000359490, 9606. ENSP00000360883, 9606. ENSP00000368678, 9606. ENSP00000368699, 9606. ENSP00000369213, 9606. ENSP00000377284, 9606. ENSP00000378217, 9606. ENSP00000379873, 9606. ENSP00000381601, 9606. ENSP00000382707, 9606. ENSP00000395590, 9606. ENSP00000399168                                                                                                                                                                                                                                                                                                                                                                                                                                                                                                                                                                                                | EIF2AK2, OASL, IL1RN, PML, TRIM25, OAS2, SP100, STAT1, GBP4, IFIT3, AGRN, ISG15, DDX58, FOLR1, PRKCD, HLA-A, MX1, IFITM3, IFI35, HLA-B                                                                                                                                                                               |

|            |                                                                                                                   |    |      |      |          |                                                                                                                                                                                                                                                                                                                                                                                                                                                                                                                                                                                                                                  |                                                                                                                                                                                 |
|------------|-------------------------------------------------------------------------------------------------------------------|----|------|------|----------|----------------------------------------------------------------------------------------------------------------------------------------------------------------------------------------------------------------------------------------------------------------------------------------------------------------------------------------------------------------------------------------------------------------------------------------------------------------------------------------------------------------------------------------------------------------------------------------------------------------------------------|---------------------------------------------------------------------------------------------------------------------------------------------------------------------------------|
| GO:0035455 | response to interferon-alpha                                                                                      | 3  | 22   | 1.57 | 3.70E-03 | 9606.ENSP00000233057,9606.ENSP00000360883,9606.ENSP00000382707                                                                                                                                                                                                                                                                                                                                                                                                                                                                                                                                                                   | EIF2AK2,IFIT3,IFITM3                                                                                                                                                            |
| GO:0002486 | antigen processing and presentation of endogenous peptide antigen via MHC class I via ER pathway, TAP-independent | 2  | 3    | 2.26 | 4.70E-03 | 9606.ENSP00000379873,9606.ENSP00000399168                                                                                                                                                                                                                                                                                                                                                                                                                                                                                                                                                                                        | HLA-A,HLA-B                                                                                                                                                                     |
| GO:0002479 | antigen processing and presentation of exogenous peptide antigen via MHC class I, TAP-dependent                   | 3  | 25   | 1.52 | 4.90E-03 | 9606.ENSP00000379873,9606.ENSP00000399168,9606.ENSP00000404833                                                                                                                                                                                                                                                                                                                                                                                                                                                                                                                                                                   | HLA-A,HLA-B,TAPBP                                                                                                                                                               |
| GO:0051603 | proteolysis involved in cellular protein catabolic process                                                        | 9  | 532  | 0.67 | 4.90E-03 | 9606.ENSP00000268058,9606.ENSP00000270586,9606.ENSP00000287156,9606.ENSP00000323889,9606.ENSP00000325677,9606.ENSP00000333266,9606.ENSP00000363993,9606.ENSP00000368699,9606.ENSP00000464087                                                                                                                                                                                                                                                                                                                                                                                                                                     | PML,PSMB6,UBE2L6,TRIM25,RNF40,UBA7,PSMB9,ISG15,RNF213                                                                                                                           |
| GO:0070887 | cellular response to chemical stimulus                                                                            | 22 | 2672 | 0.36 | 4.90E-03 | 9606.ENSP00000233057,9606.ENSP00000257570,9606.ENSP00000259206,9606.ENSP00000268058,9606.ENSP00000323889,9606.ENSP00000342278,9606.ENSP00000343023,9606.ENSP00000354394,9606.ENSP00000357722,9606.ENSP00000359490,9606.ENSP00000360883,9606.ENSP00000368678,9606.ENSP00000368699,9606.ENSP00000369213,9606.ENSP00000377284,9606.ENSP00000378217,9606.ENSP00000379873,9606.ENSP00000381601,9606.ENSP00000382707,9606.ENSP00000395590,9606.ENSP00000399168,9606.ENSP00000482445                                                                                                                                                    | EIF2AK2,OASL,IL1RN,PML,TRIM25,OAS2,SP100,STAT1,S100A8,GBP4,IFIT3,AGRN,ISG15,DDX58,FOLR1,PRKCD,HLA-A,MX1,IFITM3,IFI35,HLA-B,FAM213A                                              |
| GO:0070647 | protein modification by small protein conjugation or removal                                                      | 12 | 945  | 0.54 | 5.10E-03 | 9606.ENSP00000244061,9606.ENSP00000264346,9606.ENSP00000270586,9606.ENSP00000287156,9606.ENSP00000323889,9606.ENSP00000325677,9606.ENSP00000333266,9606.ENSP00000363993,9606.ENSP00000369213,9606.ENSP00000372155,9606.ENSP00000379873,9606.ENSP00000464087                                                                                                                                                                                                                                                                                                                                                                      | RNF114,HERC6,PSMB6,UBE2L6,TRIM25,RNF40,UBA7,PSMB9,DDX58,PSME1,HLA-A,RNF213                                                                                                      |
| GO:0002230 | positive regulation of defense response to virus by host                                                          | 3  | 26   | 1.5  | 5.20E-03 | 9606.ENSP00000268058,9606.ENSP00000354394,9606.ENSP00000369213                                                                                                                                                                                                                                                                                                                                                                                                                                                                                                                                                                   | PML,STAT1,DDX58                                                                                                                                                                 |
| GO:0050688 | regulation of defense response to virus                                                                           | 4  | 71   | 1.19 | 5.20E-03 | 9606.ENSP00000268058,9606.ENSP00000354394,9606.ENSP00000369213,9606.ENSP00000377344                                                                                                                                                                                                                                                                                                                                                                                                                                                                                                                                              | PML,STAT1,DDX58,DDX60                                                                                                                                                           |
| GO:0031347 | regulation of defense response                                                                                    | 10 | 676  | 0.61 | 5.50E-03 | 9606.ENSP00000268058,9606.ENSP00000296577,9606.ENSP00000354394,9606.ENSP00000355330,9606.ENSP00000357722,9606.ENSP00000369213,9606.ENSP00000377344,9606.ENSP00000378217,9606.ENSP00000379873,9606.ENSP00000399168                                                                                                                                                                                                                                                                                                                                                                                                                | PML,ABCE1,STAT1,TGM2,S100A8,DDX58,DDX60,PRKCD,HLA-A,HLA-B                                                                                                                       |
| GO:0019538 | protein metabolic process                                                                                         | 29 | 4194 | 0.28 | 5.70E-03 | 9606.ENSP00000226299,9606.ENSP00000233057,9606.ENSP00000244061,9606.ENSP00000247665,9606.ENSP00000249066,9606.ENSP00000264108,9606.ENSP00000264346,9606.ENSP00000268058,9606.ENSP00000270586,9606.ENSP00000287156,9606.ENSP00000296577,9606.ENSP00000323889,9606.ENSP00000325618,9606.ENSP00000325677,9606.ENSP00000327436,9606.ENSP00000332666,9606.ENSP00000347495,9606.ENSP00000355330,9606.ENSP00000357722,9606.ENSP00000363993,9606.ENSP00000364119,9606.ENSP00000368699,9606.ENSP00000369213,9606.ENSP00000372155,9606.ENSP00000378217,9606.ENSP00000379873,9606.ENSP00000408411,9606.ENSP00000464087,9606.ENSP00000464342 | LAP3,EIF2AK2,RNF114,PHPT1,APOL2,HAT1,HERC6,PML,PSMB6,UBE2L6,ABCE1,TRIM25,PARP10,RNF40,SETD3,UBA7,WARS,TGM2,S100A8,PSMB9,EIF2S2,ISG15,DDX58,PSME1,PRKCD,HLA-A,LAMP2,RNF213,RPL36 |

|            |                                                           |    |      |      |          |                                                                                                                                                                                                                                                                                                                                                                                                                                                                                                                                                                                                                                                                                                                                |                                                                                                                                                                                             |
|------------|-----------------------------------------------------------|----|------|------|----------|--------------------------------------------------------------------------------------------------------------------------------------------------------------------------------------------------------------------------------------------------------------------------------------------------------------------------------------------------------------------------------------------------------------------------------------------------------------------------------------------------------------------------------------------------------------------------------------------------------------------------------------------------------------------------------------------------------------------------------|---------------------------------------------------------------------------------------------------------------------------------------------------------------------------------------------|
| GO:0080134 | regulation of response to stress                          | 14 | 1299 | 0.47 | 6.80E-03 | 9606. ENSP00000233057,9606. ENSP00000261517,9606. ENSP00000268058,9606. ENSP00000296577,9606. ENSP00000354394,9606. ENSP00000355330,9606. ENSP00000357722,9606. ENSP00000369213,9606. ENSP00000371958,9606. ENSP00000377344,9606. ENSP00000378217,9606. ENSP00000379873,9606. ENSP00000399168,9606. ENSP00000399888                                                                                                                                                                                                                                                                                                                                                                                                            | EIF2AK2,VPS13C,PML,ABCE1,STAT1,TGM2,S100A8,DDX58,CD9,DDX60,PRKCD,HLA-A,HLA-B,HMGA1                                                                                                          |
| GO:0044248 | cellular catabolic process                                | 16 | 1646 | 0.43 | 7.10E-03 | 9606. ENSP00000268058,9606. ENSP00000270586,9606. ENSP00000279281,9606. ENSP00000287156,9606. ENSP00000323889,9606. ENSP00000325677,9606. ENSP00000333266,9606. ENSP00000342278,9606. ENSP00000349687,9606. ENSP00000357722,9606. ENSP00000363993,9606. ENSP00000368699,9606. ENSP00000379038,9606. ENSP00000408411,9606. ENSP00000464087,9606. ENSP00000464342                                                                                                                                                                                                                                                                                                                                                                | PML,PSMB6,VP551,UBE2L6,TRIM25,RNF40,UBA7,OAS2,GM2A,S100A8,PSMB9,ISG15,TYMP,LAMP2,RNF213,RPL36                                                                                               |
| GO:0048519 | negative regulation of biological process                 | 32 | 4953 | 0.25 | 7.40E-03 | 9606. ENSP00000233057,9606. ENSP00000247665,9606. ENSP00000257570,9606. ENSP00000259206,9606. ENSP00000261517,9606. ENSP00000263946,9606. ENSP00000264108,9606. ENSP00000268058,9606. ENSP00000287156,9606. ENSP00000296577,9606. ENSP00000305699,9606. ENSP00000323889,9606. ENSP00000325618,9606. ENSP00000325677,9606. ENSP00000333266,9606. ENSP00000343023,9606. ENSP00000347495,9606. ENSP00000354394,9606. ENSP0000036083,9606. ENSP00000364585,9606. ENSP00000368699,9606. ENSP00000369213,9606. ENSP00000371958,9606. ENSP00000378217,9606. ENSP00000379873,9606. ENSP00000381601,9606. ENSP00000382707,9606. ENSP00000399168,9606. ENSP00000399888,9606. ENSP00000408411,9606. ENSP00000464087,9606. ENSP00000464342 | EIF2AK2,PHPT1,OASL,IL1RN,VPS13C,PKP1,HAT1,PML,UBE2L6,ABCE1,HOKK3,TRIM25,PARP10,RNF40,UBA7,SP100,WARS,STAT1,IFIT3,RCC2,ISG15,DDX58,CD9,PRKCD,HLA-A,MX1,IFITM3,HLA-B,HMGA1,LAMP2,RNF213,RPL36 |
| GO:0051239 | regulation of multicellular organismal process            | 22 | 2788 | 0.34 | 7.50E-03 | 9606. ENSP00000233057,9606. ENSP00000259206,9606. ENSP00000268058,9606. ENSP00000287156,9606. ENSP00000305699,9606. ENSP00000309539,9606. ENSP00000323889,9606. ENSP00000333266,9606. ENSP00000342278,9606. ENSP00000343023,9606. ENSP00000347495,9606. ENSP00000354394,9606. ENSP00000368678,9606. ENSP00000368699,9606. ENSP00000369213,9606. ENSP00000371958,9606. ENSP00000377344,9606. ENSP00000378217,9606. ENSP00000379038,9606. ENSP00000379873,9606. ENSP00000399168,9606. ENSP000004482445                                                                                                                                                                                                                           | EIF2AK2,IL1RN,PML,UBE2L6,HOKK3,DPYSL2,TRIM25,UBA7,OAS2,SP100,WARS,STAT1,AGRN,ISG15,DDX58,CD9,DDX60,PRKCD,TYMP,HLA-A,HLA-B,FAM213A                                                           |
| GO:0042270 | protection from natural killer cell mediated cytotoxicity | 2  | 5    | 2.04 | 7.80E-03 | 9606. ENSP00000379873,9606. ENSP00000399168                                                                                                                                                                                                                                                                                                                                                                                                                                                                                                                                                                                                                                                                                    | HLA-A,HLA-B                                                                                                                                                                                 |
| GO:0090398 | cellular senescence                                       | 3  | 32   | 1.41 | 7.80E-03 | 9606. ENSP00000268058,9606. ENSP00000378217,9606. ENSP00000399888                                                                                                                                                                                                                                                                                                                                                                                                                                                                                                                                                                                                                                                              | PML,PRKCD,HMGA1                                                                                                                                                                             |
| GO:0001818 | negative regulation of cytokine production                | 6  | 245  | 0.83 | 8.30E-03 | 9606. ENSP00000268058,9606. ENSP00000287156,9606. ENSP00000323889,9606. ENSP00000333266,9606. ENSP00000368699,9606. ENSP00000369213                                                                                                                                                                                                                                                                                                                                                                                                                                                                                                                                                                                            | PML,UBE2L6,TRIM25,UBA7,ISG15,DDX58                                                                                                                                                          |
| GO:0009056 | catabolic process                                         | 17 | 1859 | 0.4  | 8.30E-03 | 9606. ENSP00000268058,9606. ENSP00000270586,9606. ENSP00000279281,9606. ENSP00000287156,9606. ENSP00000323889,9606. ENSP00000325677,9606. ENSP00000333266,9606. ENSP00000342278,9606. ENSP00000349687,9606. ENSP00000357722,9606. ENSP00000363993,9606. ENSP00000368678,9606. ENSP00000368699,9606. ENSP00000379038,9606. ENSP00000408411,9606. ENSP00000464087,9606. ENSP00000464342                                                                                                                                                                                                                                                                                                                                          | PML,PSMB6,VP551,UBE2L6,TRIM25,RNF40,UBA7,OAS2,GM2A,S100A8,PSMB9,AGRN,ISG15,TYMP,LAMP2,RNF213,RPL36                                                                                          |

|            |                                                                                                   |    |      |      |          |                                                                                                                                                                                                                                                                                                                                                                                                                                                                                                                                                                                                             |                                                                                                                                                                       |
|------------|---------------------------------------------------------------------------------------------------|----|------|------|----------|-------------------------------------------------------------------------------------------------------------------------------------------------------------------------------------------------------------------------------------------------------------------------------------------------------------------------------------------------------------------------------------------------------------------------------------------------------------------------------------------------------------------------------------------------------------------------------------------------------------|-----------------------------------------------------------------------------------------------------------------------------------------------------------------------|
| GO:0043603 | cellular amide metabolic process                                                                  | 10 | 732  | 0.58 | 8.80E-03 | 9606.ENSP00000233057,9606.ENSP00000296577,9606.ENSP00000347495,9606.ENSP00000349687,9606.ENSP00000364119,9606.ENSP00000367923,9606.ENSP00000377284,9606.ENSP00000404833,9606.ENSP00000408411,9606.ENSP00000464342                                                                                                                                                                                                                                                                                                                                                                                           | EIF2AK2,ABCE1,WARS,GM2A,EIF2S2,SUCLA2,FOLR1,TAPBP,LAMP2,RPL36                                                                                                         |
| GO:0016192 | vesicle-mediated transport                                                                        | 16 | 1699 | 0.41 | 9.10E-03 | 9606.ENSP00000261517,9606.ENSP00000263946,9606.ENSP00000279281,9606.ENSP00000305699,9606.ENSP00000309539,9606.ENSP00000349687,9606.ENSP00000355330,9606.ENSP00000357722,9606.ENSP00000371958,9606.ENSP00000377284,9606.ENSP00000377566,9606.ENSP00000378217,9606.ENSP00000379873,9606.ENSP00000399168,9606.ENSP00000404833,9606.ENSP00000408411                                                                                                                                                                                                                                                             | VPS13C,PKP1,VPS51,HOOK3,DPYSL2,GM2A,TGM2,S100A8,CD9,FOLR1,ELMO3,PRKCD,HLA-A,HLA-B,TAPBP,LAMP2                                                                         |
| GO:1902275 | regulation of chromatin organization                                                              | 5  | 162  | 0.93 | 9.30E-03 | 9606.ENSP00000268058,9606.ENSP00000325618,9606.ENSP00000325677,9606.ENSP00000380557,9606.ENSP00000399888                                                                                                                                                                                                                                                                                                                                                                                                                                                                                                    | PML,PARP10,RNF40,AKAP8L,HMGA1                                                                                                                                         |
| GO:0042221 | response to chemical                                                                              | 28 | 4153 | 0.27 | 1.02E-02 | 9606.ENSP00000233057,9606.ENSP00000243253,9606.ENSP00000257570,9606.ENSP00000259206,9606.ENSP00000264108,9606.ENSP00000268058,9606.ENSP00000309539,9606.ENSP00000323889,9606.ENSP00000325677,9606.ENSP00000342278,9606.ENSP00000343023,9606.ENSP00000354394,9606.ENSP00000357722,9606.ENSP00000359490,9606.ENSP00000360883,9606.ENSP00000368678,9606.ENSP00000368699,9606.ENSP00000369213,9606.ENSP00000371958,9606.ENSP00000377284,9606.ENSP00000378217,9606.ENSP00000379038,9606.ENSP00000379873,9606.ENSP00000381601,9606.ENSP00000382707,9606.ENSP00000395590,9606.ENSP00000399168,9606.ENSP00000482445 | EIF2AK2,SEC61A1,OASL,IL1RN,HAT1,PML,DPYSL2,TRIM25,RNF40,OAS2,SP100,STAT1,S100A8,GBP4,IFIT3,AGRN,ISG15,DDX58,CD9,FOLR1,PRKCD,TYMP,HLA-A,MX1,IFITM3,IFI35,HLA-B,FAM213A |
| GO:0019985 | translesion synthesis                                                                             | 3  | 41   | 1.3  | 1.39E-02 | 9606.ENSP00000287156,9606.ENSP00000323889,9606.ENSP00000368699                                                                                                                                                                                                                                                                                                                                                                                                                                                                                                                                              | UBE2L6,TRIM25,ISG15                                                                                                                                                   |
| GO:0002480 | antigen processing and presentation of exogenous peptide antigen via MHC class I, TAP-independent | 2  | 8    | 1.84 | 1.45E-02 | 9606.ENSP00000379873,9606.ENSP00000399168                                                                                                                                                                                                                                                                                                                                                                                                                                                                                                                                                                   | HLA-A,HLA-B                                                                                                                                                           |
| GO:1901575 | organic substance catabolic process                                                               | 15 | 1609 | 0.41 | 1.49E-02 | 9606.ENSP00000268058,9606.ENSP00000270586,9606.ENSP00000287156,9606.ENSP00000323889,9606.ENSP00000325677,9606.ENSP00000333266,9606.ENSP00000342278,9606.ENSP00000349687,9606.ENSP00000363993,9606.ENSP00000368678,9606.ENSP00000368699,9606.ENSP00000379038,9606.ENSP00000408411,9606.ENSP00000464087,9606.ENSP00000464342                                                                                                                                                                                                                                                                                  | PML,PSMB6,UBE2L6,TRIM25,RNF40,UBA7,OAS2,GM2A,PSMB9,AGRN,ISG15,TYMP,LAMP2,RNF213,RPL36                                                                                 |
| GO:0032101 | regulation of response to external stimulus                                                       | 11 | 955  | 0.5  | 1.62E-02 | 9606.ENSP00000268058,9606.ENSP00000296577,9606.ENSP00000354394,9606.ENSP00000355330,9606.ENSP00000357722,9606.ENSP00000369213,9606.ENSP00000371958,9606.ENSP00000377344,9606.ENSP00000378217,9606.ENSP00000379873,9606.ENSP00000399168                                                                                                                                                                                                                                                                                                                                                                      | PML,ABCE1,STAT1,TGM2,S100A8,DDX58,CD9,DDX60,PRKCD,HLA-A,HLA-B                                                                                                         |
| GO:0006464 | cellular protein modification process                                                             | 22 | 2999 | 0.31 | 1.72E-02 | 9606.ENSP00000233057,9606.ENSP00000244061,9606.ENSP00000247665,9606.ENSP00000264108,9606.ENSP00000264346,9606.ENSP00000268058,9606.ENSP00000270586,9606.ENSP00000287156,9606.ENSP00000323889,9606.ENSP00000325618,9606.ENSP00000325677,9606.ENSP00000327436,9606.ENSP00000333266,9606.ENSP00000355330,9606.ENSP00000357722,9606.ENSP00000363993,9606.ENSP00000368699,9606.ENSP00000369213,9606.ENSP00000372155,9606.ENSP00000378217,9606.ENSP00000379873,9606.ENSP00000464087                                                                                                                               | EIF2AK2,RNF114,PHPT1,HAT1,HERC6,PML,PSMB6,UBE2L6,TRIM25,PARP10,RNF40,SETD3,UBA7,TGM2,S100A8,PSMB9,ISG15,DDX58,PSME1,PRKCD,HLA-A,RNF213                                |

|            |                                                          |    |      |      |          |                                                                                                                                                                                                                                                                                                                                                                                                                                                                                                                                                                                                                                                                                                                                                                                                                                                                                                                                                                                                                                                                                                 |                                                                                                                                                                                                                                                                                                |
|------------|----------------------------------------------------------|----|------|------|----------|-------------------------------------------------------------------------------------------------------------------------------------------------------------------------------------------------------------------------------------------------------------------------------------------------------------------------------------------------------------------------------------------------------------------------------------------------------------------------------------------------------------------------------------------------------------------------------------------------------------------------------------------------------------------------------------------------------------------------------------------------------------------------------------------------------------------------------------------------------------------------------------------------------------------------------------------------------------------------------------------------------------------------------------------------------------------------------------------------|------------------------------------------------------------------------------------------------------------------------------------------------------------------------------------------------------------------------------------------------------------------------------------------------|
| GO:0009617 | response to bacterium                                    | 8  | 555  | 0.6  | 2.22E-02 | 9606. ENSP00000264346,9606. ENSP00000342278,9606. ENSP00000357722,9606. ENSP00000359783,9606. ENSP00000368699,9606. ENSP00000378217,9606. ENSP00000379873,9606. ENSP00000399168                                                                                                                                                                                                                                                                                                                                                                                                                                                                                                                                                                                                                                                                                                                                                                                                                                                                                                                 | HERC6,OAS2,S100A8,IFI44,ISG15,PRKCD,HLA-A,HLA-B                                                                                                                                                                                                                                                |
| GO:0090331 | negative regulation of platelet aggregation              | 2  | 11   | 1.7  | 2.28E-02 | 9606. ENSP00000371958,9606. ENSP00000378217                                                                                                                                                                                                                                                                                                                                                                                                                                                                                                                                                                                                                                                                                                                                                                                                                                                                                                                                                                                                                                                     | CD9,PRKCD                                                                                                                                                                                                                                                                                      |
| GO:0008152 | metabolic process                                        | 48 | 9569 | 0.14 | 2.60E-02 | 9606. ENSP00000226299,9606. ENSP00000233057,9606. ENSP00000244061,9606. ENSP00000247665,9606. ENSP00000249066,9606. ENSP00000259206,9606. ENSP00000264108,9606. ENSP00000264346,9606. ENSP00000268058,9606. ENSP00000270586,9606. ENSP00000279281,9606. ENSP00000287156,9606. ENSP00000296577,9606. ENSP00000309539,9606. ENSP00000313432,9606. ENSP00000323889,9606. ENSP00000325618,9606. ENSP00000325677,9606. ENSP00000327436,9606. ENSP00000333266,9606. ENSP00000342278,9606. ENSP00000343023,9606. ENSP00000347495,9606. ENSP00000349687,9606. ENSP00000354394,9606. ENSP00000355330,9606. ENSP00000357722,9606. ENSP00000363993,9606. ENSP00000364119,9606. ENSP00000367923,9606. ENSP00000368678,9606. ENSP00000368699,9606. ENSP00000369213,9606. ENSP00000371958,9606. ENSP00000372155,9606. ENSP00000377284,9606. ENSP00000378217,9606. ENSP00000379038,9606. ENSP00000379873,9606. ENSP00000380557,9606. ENSP00000380837,9606. ENSP00000399888,9606. ENSP00000400591,9606. ENSP00000404833,9606. ENSP00000408411,9606. ENSP00000464087,9606. ENSP00000464342,9606. ENSP00000482445 | LAP3,EIF2AK2,RNF114,PHPT1,APOL2,IL1RN,HAT1,HERC6,PML,PSMB6,VPS51,UBE2L6,ABCE1,DPYSL2,GRHPR,TRIM25,PARP10,RNF40,SETD3,UBA7,OAS2,SP100,WARS,GM2A,STAT1,TGM2,S100A8,PSMB9,EIF2S2,SUCLA2,AGRN,ISG15,DDX58,CD9,PSME1,FOLR1,PRKCD,TYMP,HLA-A,AKAP8L,LSS,HMGA1,SNRPE,TAPBP,LAMP2,RNF213,RPL36,FAM213A |
| GO:0006508 | proteolysis                                              | 12 | 1203 | 0.44 | 2.88E-02 | 9606. ENSP00000226299,9606. ENSP00000268058,9606. ENSP00000270586,9606. ENSP00000287156,9606. ENSP00000323889,9606. ENSP00000325677,9606. ENSP00000333266,9606. ENSP00000363993,9606. ENSP00000368699,9606. ENSP00000369213,9606. ENSP00000372155,9606. ENSP00000464087                                                                                                                                                                                                                                                                                                                                                                                                                                                                                                                                                                                                                                                                                                                                                                                                                         | LAP3,PML,PSMB6,UBE2L6,TRIM25,RNF40,UBA7,PSMB9,ISG15,DDX58,PSME1,RNF213                                                                                                                                                                                                                         |
| GO:0051234 | establishment of localization                            | 27 | 4248 | 0.24 | 2.95E-02 | 9606. ENSP00000243253,9606. ENSP00000249066,9606. ENSP00000259206,9606. ENSP00000261517,9606. ENSP00000263946,9606. ENSP00000268058,9606. ENSP00000279281,9606. ENSP00000296577,9606. ENSP00000302037,9606. ENSP00000305699,9606. ENSP00000309539,9606. ENSP00000349687,9606. ENSP00000355330,9606. ENSP00000357722,9606. ENSP00000364119,9606. ENSP00000364585,9606. ENSP00000371958,9606. ENSP00000377284,9606. ENSP00000377566,9606. ENSP00000378217,9606. ENSP00000379873,9606. ENSP00000399168,9606. ENSP00000399888,9606. ENSP00000400591,9606. ENSP00000404833,9606. ENSP00000408411,9606. ENSP00000464342                                                                                                                                                                                                                                                                                                                                                                                                                                                                               | SEC61A1,APOL2,IL1RN,VPS13C,PKP1,PML,VPS51,ABCE1,MFF,HOOK3,DPYSL2,GM2A,TGM2,S100A8,EIF2S2,RCC2,CD9,FOLR1,ELMO3,PRKCD,HLA-A,HLA-B,HMGA1,SNRPE,TAPBP,LAMP2,RPL36                                                                                                                                  |
| GO:0002682 | regulation of immune system process                      | 13 | 1391 | 0.41 | 3.08E-02 | 9606. ENSP00000233057,9606. ENSP00000247665,9606. ENSP00000268058,9606. ENSP00000296577,9606. ENSP00000354394,9606. ENSP00000357722,9606. ENSP00000368699,9606. ENSP00000369213,9606. ENSP00000377344,9606. ENSP00000378217,9606. ENSP00000379873,9606. ENSP00000399168,9606. ENSP00000399168,9606. ENSP00000482445                                                                                                                                                                                                                                                                                                                                                                                                                                                                                                                                                                                                                                                                                                                                                                             | EIF2AK2,PHPT1,PML,ABCE1,STAT1,S100A8,ISG15,DDX58,DDX60,PRKCD,HLA-A,HLA-B,FAM213A                                                                                                                                                                                                               |
| GO:0019884 | antigen processing and presentation of exogenous antigen | 4  | 130  | 0.93 | 3.08E-02 | 9606. ENSP00000372155,9606. ENSP00000379873,9606. ENSP00000399168,9606. ENSP00000404833                                                                                                                                                                                                                                                                                                                                                                                                                                                                                                                                                                                                                                                                                                                                                                                                                                                                                                                                                                                                         | PSME1,HLA-A,HLA-B,TAPBP                                                                                                                                                                                                                                                                        |

|            |                                                  |    |      |      |          |                                                                                                                                                                                                                                                                                                                                                                                                                                                                                                                                                                                                                                                                                                                                                                                                                                                                                                                                                                                                       |                                                                                                                                                                                                                                                                                  |
|------------|--------------------------------------------------|----|------|------|----------|-------------------------------------------------------------------------------------------------------------------------------------------------------------------------------------------------------------------------------------------------------------------------------------------------------------------------------------------------------------------------------------------------------------------------------------------------------------------------------------------------------------------------------------------------------------------------------------------------------------------------------------------------------------------------------------------------------------------------------------------------------------------------------------------------------------------------------------------------------------------------------------------------------------------------------------------------------------------------------------------------------|----------------------------------------------------------------------------------------------------------------------------------------------------------------------------------------------------------------------------------------------------------------------------------|
| GO:0019941 | modification-dependent protein catabolic process | 7  | 467  | 0.62 | 3.35E-02 | 9606.ENSP00000268058,9606.ENSP00000287156,9606.ENSP00000323889,9606.ENSP00000325677,9606.ENSP00000333266,9606.ENSP00000368699,9606.ENSP00000464087                                                                                                                                                                                                                                                                                                                                                                                                                                                                                                                                                                                                                                                                                                                                                                                                                                                    | PML,UBE2L6,TRIM25,RNF40,UBA7,ISG15,RNF213                                                                                                                                                                                                                                        |
| GO:0051336 | regulation of hydrolase activity                 | 12 | 1238 | 0.43 | 3.37E-02 | 9606.ENSP00000216479,9606.ENSP00000233057,9606.ENSP00000268058,9606.ENSP00000296577,9606.ENSP00000337641,9606.ENSP00000349687,9606.ENSP00000357722,9606.ENSP00000363993,9606.ENSP00000364585,9606.ENSP00000368678,9606.ENSP00000372155,9606.ENSP00000378217                                                                                                                                                                                                                                                                                                                                                                                                                                                                                                                                                                                                                                                                                                                                           | AHSA1,EIF2AK2,PML,ABCE1,PPP2R5E,GM2A,S100A8,PSMB9,RCC2,AGRN,PSME1,PRKCD                                                                                                                                                                                                          |
| GO:0071704 | organic substance metabolic process              | 46 | 9135 | 0.14 | 3.37E-02 | 9606.ENSP00000226299,9606.ENSP00000233057,9606.ENSP00000244061,9606.ENSP00000247665,9606.ENSP00000249066,9606.ENSP00000259206,9606.ENSP00000264108,9606.ENSP00000264346,9606.ENSP00000268058,9606.ENSP00000270586,9606.ENSP00000287156,9606.ENSP00000296577,9606.ENSP00000309539,9606.ENSP00000313432,9606.ENSP00000323889,9606.ENSP00000325618,9606.ENSP00000325677,9606.ENSP00000327436,9606.ENSP00000333266,9606.ENSP00000342278,9606.ENSP00000343023,9606.ENSP00000347495,9606.ENSP00000349687,9606.ENSP00000354394,9606.ENSP00000355330,9606.ENSP00000357722,9606.ENSP00000363993,9606.ENSP00000364119,9606.ENSP00000367923,9606.ENSP00000368678,9606.ENSP00000368699,9606.ENSP00000369213,9606.ENSP00000371958,9606.ENSP00000372155,9606.ENSP00000377284,9606.ENSP00000378217,9606.ENSP00000379038,9606.ENSP00000379873,9606.ENSP00000380557,9606.ENSP00000380837,9606.ENSP00000399888,9606.ENSP00000400591,9606.ENSP00000404833,9606.ENSP00000408411,9606.ENSP00000464087,9606.ENSP00000464342 | LAP3,EIF2AK2,RNF114,PHPT1,APOL2,IL1RN,HAT1,HERC6,PML,PSMB6,UBE2L6,ABCE1,DPYSL2,GRHPR,TRIM25,PARP10,RNF40,SETD3,UBA7,OAS2,SP100,WARS,GM2A,STAT1,TGM2,S100A8,PSMB9,EIF2S2,SUCLA2,AGRN,ISG15,DDX58,CD9,PSME1,FOLR1,PRKCD,TYMP,HLA-A,AKAP8L,LSS,HMGA1,SNRPE,TAPBP,LAMP2,RNF213,RPL36 |
| GO:0016045 | detection of bacterium                           | 2  | 15   | 1.57 | 3.40E-02 | 9606.ENSP00000379873,9606.ENSP00000399168                                                                                                                                                                                                                                                                                                                                                                                                                                                                                                                                                                                                                                                                                                                                                                                                                                                                                                                                                             | HLA-A,HLA-B                                                                                                                                                                                                                                                                      |
| GO:0006807 | nitrogen compound metabolic process              | 43 | 8349 | 0.15 | 3.62E-02 | 9606.ENSP00000226299,9606.ENSP00000233057,9606.ENSP00000244061,9606.ENSP00000247665,9606.ENSP00000249066,9606.ENSP00000264108,9606.ENSP00000264346,9606.ENSP00000268058,9606.ENSP00000270586,9606.ENSP00000287156,9606.ENSP00000296577,9606.ENSP00000309539,9606.ENSP00000313432,9606.ENSP00000323889,9606.ENSP00000325618,9606.ENSP00000325677,9606.ENSP00000327436,9606.ENSP00000333266,9606.ENSP00000342278,9606.ENSP00000343023,9606.ENSP00000347495,9606.ENSP00000349687,9606.ENSP00000354394,9606.ENSP00000355330,9606.ENSP00000357722,9606.ENSP00000363993,9606.ENSP00000364119,9606.ENSP00000367923,9606.ENSP00000368678,9606.ENSP00000368699,9606.ENSP00000369213,9606.ENSP00000372155,9606.ENSP00000377284,9606.ENSP00000378217,9606.ENSP00000379038,9606.ENSP00000379873,9606.ENSP00000380557,9606.ENSP00000399888,9606.ENSP00000400591,9606.ENSP00000404833,9606.ENSP00000408411,9606.ENSP00000464087,9606.ENSP00000464342                                                                | LAP3,EIF2AK2,RNF114,PHPT1,APOL2,HAT1,HERC6,PML,PSMB6,UBE2L6,ABCE1,DPYSL2,GRHPR,TRIM25,PARP10,RNF40,SETD3,UBA7,OAS2,SP100,WARS,GM2A,STAT1,TGM2,S100A8,PSMB9,EIF2S2,SUCLA2,AGRN,ISG15,DDX58,PSME1,FOLR1,PRKCD,TYMP,HLA-A,AKAP8L,HMGA1,SNRPE,TAPBP,LAMP2,RNF213,RPL36               |
| GO:0007166 | cell surface receptor signaling pathway          | 17 | 2198 | 0.33 | 3.75E-02 | 9606.ENSP00000257570,9606.ENSP00000259206,9606.ENSP00000268058,9606.ENSP00000323889,9606.ENSP00000342278,9606.ENSP00000343023,9606.ENSP00000354394,9606.ENSP00000360883,9606.ENSP00000364585,9606.ENSP00000368699,9606.ENSP00000371958,9606.ENSP00000378217,9606.ENSP00000379873,9606.ENSP00000381601,9606.ENSP00000382707,9606.ENSP00000395590,9606.ENSP00000399168                                                                                                                                                                                                                                                                                                                                                                                                                                                                                                                                                                                                                                  | OASL,IL1RN,PML,TRIM25,OAS2,SP100,STAT1,IFIT3,RCC2,ISG15,CD9,PRKCD,HLA-A,MX1,IFITM3,IFI35,HLA-B                                                                                                                                                                                   |

|            |                                                                       |    |      |      |          |                                                                                                                                                                                                                                                                                                                                                                                                                                                                                                                                                                                                                      |                                                                                                                                                                                   |
|------------|-----------------------------------------------------------------------|----|------|------|----------|----------------------------------------------------------------------------------------------------------------------------------------------------------------------------------------------------------------------------------------------------------------------------------------------------------------------------------------------------------------------------------------------------------------------------------------------------------------------------------------------------------------------------------------------------------------------------------------------------------------------|-----------------------------------------------------------------------------------------------------------------------------------------------------------------------------------|
| GO:0006810 | transport                                                             | 26 | 4130 | 0.24 | 3.79E-02 | 9606. ENSP00000243253, 9606. ENSP00000249066, 9606. ENSP00000259206, 9606. ENSP00000261517, 9606. ENSP00000263946, 9606. ENSP00000268058, 9606. ENSP00000279281, 9606. ENSP00000296577, 9606. ENSP00000302037, 9606. ENSP00000305699, 9606. ENSP00000309539, 9606. ENSP00000349687, 9606. ENSP00000355330, 9606. ENSP00000357722, 9606. ENSP00000364119, 9606. ENSP00000371958, 9606. ENSP00000377284, 9606. ENSP00000377566, 9606. ENSP00000378217, 9606. ENSP00000379873, 9606. ENSP00000399168, 9606. ENSP00000399888, 9606. ENSP00000400591, 9606. ENSP00000404833, 9606. ENSP00000408411, 9606. ENSP00000464342 | SEC61A1, APOL2, IL1RN, VPS13C, PKP1, PML, VPS51, ABCE1, MFF, HOOK3, DPYSL2, GM2A, TGM2, S100A8, EIF2S2, CD9, FOLR1, ELMO3, PRKCD, HLA-A, HLA-B, HMGA1, SNRPE, TAPBP, LAMP2, RPL36 |
| GO:0043312 | neutrophil degranulation                                              | 7  | 485  | 0.6  | 3.79E-02 | 9606. ENSP00000263946, 9606. ENSP00000349687, 9606. ENSP00000357722, 9606. ENSP00000378217, 9606. ENSP00000379873, 9606. ENSP00000399168, 9606. ENSP00000408411                                                                                                                                                                                                                                                                                                                                                                                                                                                      | PKP1, GM2A, S100A8, PRKCD, HLA-A, HLA-B, LAMP2                                                                                                                                    |
| GO:0051241 | negative regulation of multicellular organismal process               | 11 | 1098 | 0.44 | 3.79E-02 | 9606. ENSP00000268058, 9606. ENSP00000287156, 9606. ENSP00000305699, 9606. ENSP00000323889, 9606. ENSP00000333266, 9606. ENSP00000343023, 9606. ENSP00000354394, 9606. ENSP00000368699, 9606. ENSP00000369213, 9606. ENSP00000371958, 9606. ENSP00000378217                                                                                                                                                                                                                                                                                                                                                          | PML, UBE2L6, HOOK3, TRIM25, UBA7, SP100, STAT1, ISG15, DDX58, CD9, PRKCD                                                                                                          |
| GO:0001916 | positive regulation of T cell mediated cytotoxicity                   | 2  | 17   | 1.51 | 3.86E-02 | 9606. ENSP00000379873, 9606. ENSP00000399168                                                                                                                                                                                                                                                                                                                                                                                                                                                                                                                                                                         | HLA-A, HLA-B                                                                                                                                                                      |
| GO:0002697 | regulation of immune effector process                                 | 6  | 362  | 0.66 | 3.86E-02 | 9606. ENSP00000268058, 9606. ENSP00000354394, 9606. ENSP00000369213, 9606. ENSP00000377344, 9606. ENSP00000379873, 9606. ENSP00000399168                                                                                                                                                                                                                                                                                                                                                                                                                                                                             | PML, STAT1, DDX58, DDX60, HLA-A, HLA-B                                                                                                                                            |
| GO:0008631 | intrinsic apoptotic signaling pathway in response to oxidative stress | 2  | 17   | 1.51 | 3.86E-02 | 9606. ENSP00000268058, 9606. ENSP00000378217                                                                                                                                                                                                                                                                                                                                                                                                                                                                                                                                                                         | PML, PRKCD                                                                                                                                                                        |
| GO:0048384 | retinoic acid receptor signaling pathway                              | 2  | 17   | 1.51 | 3.86E-02 | 9606. ENSP00000268058, 9606. ENSP00000343023                                                                                                                                                                                                                                                                                                                                                                                                                                                                                                                                                                         | PML, SP100                                                                                                                                                                        |
| GO:0050793 | regulation of developmental process                                   | 18 | 2416 | 0.31 | 3.86E-02 | 9606. ENSP00000233057, 9606. ENSP00000259206, 9606. ENSP00000268058, 9606. ENSP00000302037, 9606. ENSP00000305699, 9606. ENSP00000309539, 9606. ENSP00000327436, 9606. ENSP00000342278, 9606. ENSP00000343023, 9606. ENSP00000347495, 9606. ENSP00000354394, 9606. ENSP00000364585, 9606. ENSP00000368678, 9606. ENSP00000368699, 9606. ENSP00000379038, 9606. ENSP00000399168, 9606. ENSP00000399888, 9606. ENSP00000482445                                                                                                                                                                                         | EIF2AK2, IL1RN, PML, MFF, HOOK3, DPYSL2, SETD3, OAS2, SP100, WARS, STAT1, RCC2, AGRN, ISG15, TYMP, HLA-B, HMGA1, FAM213A                                                          |
| GO:1902187 | negative regulation of viral release from host cell                   | 2  | 17   | 1.51 | 3.86E-02 | 9606. ENSP00000268058, 9606. ENSP00000323889                                                                                                                                                                                                                                                                                                                                                                                                                                                                                                                                                                         | PML, TRIM25                                                                                                                                                                       |
| GO:0006518 | peptide metabolic process                                             | 7  | 497  | 0.59 | 3.88E-02 | 9606. ENSP00000233057, 9606. ENSP00000296577, 9606. ENSP00000347495, 9606. ENSP00000364119, 9606. ENSP00000404833, 9606. ENSP00000408411, 9606. ENSP00000464342                                                                                                                                                                                                                                                                                                                                                                                                                                                      | EIF2AK2, ABCE1, WARS, EIF2S2, TAPBP, LAMP2, RPL36                                                                                                                                 |
| GO:0016567 | protein ubiquitination                                                | 8  | 645  | 0.53 | 3.88E-02 | 9606. ENSP00000244061, 9606. ENSP00000264346, 9606. ENSP00000287156, 9606. ENSP00000323889, 9606. ENSP00000325677, 9606. ENSP00000333266, 9606. ENSP00000379873, 9606. ENSP00000464087                                                                                                                                                                                                                                                                                                                                                                                                                               | RNF114, HERC6, UBE2L6, TRIM25, RNF40, UBA7, HLA-A, RNF213                                                                                                                         |
| GO:0043555 | regulation of translation in response to stress                       | 2  | 18   | 1.49 | 3.88E-02 | 9606. ENSP00000233057, 9606. ENSP00000268058                                                                                                                                                                                                                                                                                                                                                                                                                                                                                                                                                                         | EIF2AK2, PML                                                                                                                                                                      |
| GO:0046597 | negative regulation of viral entry into host cell                     | 2  | 18   | 1.49 | 3.88E-02 | 9606. ENSP00000323889, 9606. ENSP00000382707                                                                                                                                                                                                                                                                                                                                                                                                                                                                                                                                                                         | TRIM25, IFITM3                                                                                                                                                                    |
| GO:0051091 | positive regulation of DNA-binding transcription factor activity      | 5  | 250  | 0.74 | 3.88E-02 | 9606. ENSP00000233057, 9606. ENSP00000323889, 9606. ENSP00000343023, 9606. ENSP00000357722, 9606. ENSP00000369213                                                                                                                                                                                                                                                                                                                                                                                                                                                                                                    | EIF2AK2, TRIM25, SP100, S100A8, DDX58                                                                                                                                             |



|            |                                                      |   |     |      |          |                                                                                                                                                                         |                                               |
|------------|------------------------------------------------------|---|-----|------|----------|-------------------------------------------------------------------------------------------------------------------------------------------------------------------------|-----------------------------------------------|
| GO:0051235 | maintenance of location                              | 4 | 150 | 0.87 | 3.88E-02 | 9606.ENSP00000268058,9606.ENSP00000343023,9606.ENSP00000349687,9606.ENSP00000357722                                                                                     | PML,SP100,GM2A,S100A8                         |
| GO:0033365 | protein localization to organelle                    | 8 | 649 | 0.53 | 3.95E-02 | 9606.ENSP00000243253,9606.ENSP00000268058,9606.ENSP00000302037,9606.ENSP00000305699,9606.ENSP00000343023,9606.ENSP00000364585,9606.ENSP00000408411,9606.ENSP00000464342 | SEC61A1,PML,MFF,HOOK3,SP100,RCC2,LAMP2,RPL36  |
| GO:0000266 | mitochondrial fission                                | 2 | 19  | 1.46 | 4.03E-02 | 9606.ENSP00000302037,9606.ENSP00000381601                                                                                                                               | MFF,MX1                                       |
| GO:0002526 | acute inflammatory response                          | 3 | 73  | 1.05 | 4.03E-02 | 9606.ENSP00000249066,9606.ENSP00000259206,9606.ENSP00000357722                                                                                                          | APOL2,IL1RN,S100A8                            |
| GO:0031065 | positive regulation of histone deacetylation         | 2 | 19  | 1.46 | 4.03E-02 | 9606.ENSP00000268058,9606.ENSP00000380557                                                                                                                               | PML,AKAP8L                                    |
| GO:0090087 | regulation of peptide transport                      | 8 | 654 | 0.53 | 4.03E-02 | 9606.ENSP00000247665,9606.ENSP00000268058,9606.ENSP00000302037,9606.ENSP00000343023,9606.ENSP00000357722,9606.ENSP00000369213,9606.ENSP00000378217,9606.ENSP00000380557 | PHPT1,PML,MFF,SP100,S100A8,DDX58,PRKCD,AKAP8L |
| GO:1902914 | regulation of protein polyubiquitination             | 2 | 19  | 1.46 | 4.03E-02 | 9606.ENSP00000325618,9606.ENSP00000325677                                                                                                                               | PARP10,RNF40                                  |
| GO:0032069 | regulation of nuclease activity                      | 2 | 20  | 1.44 | 4.23E-02 | 9606.ENSP00000296577,9606.ENSP00000378217                                                                                                                               | ABCE1,PRKCD                                   |
| GO:0008285 | negative regulation of cell population proliferation | 8 | 669 | 0.52 | 4.35E-02 | 9606.ENSP00000233057,9606.ENSP00000268058,9606.ENSP00000325618,9606.ENSP00000347495,9606.ENSP00000354394,9606.ENSP00000360883,9606.ENSP00000371958,9606.ENSP00000399888 | EIF2AK2,PML,PARP10,WARS,STAT1,IFIT3,CD9,HMGA1 |
| GO:0060759 | regulation of response to cytokine stimulus          | 4 | 162 | 0.83 | 4.43E-02 | 9606.ENSP00000259206,9606.ENSP00000296577,9606.ENSP00000354394,9606.ENSP00000369213                                                                                     | IL1RN,ABCE1,STAT1,DDX58                       |
| GO:0051457 | maintenance of protein location in nucleus           | 2 | 22  | 1.4  | 4.75E-02 | 9606.ENSP00000268058,9606.ENSP00000343023                                                                                                                               | PML,SP100                                     |

T = 72 h, Untreated: CoV-2 / mock

| #Term ID   | Term Description                          | Genes Mapped | Enrichment Score | Direction | False Discovery Rate | Method | Matching Proteins in Your Input (IDs)                                                                                                                                                                                                                                                                                                                                                                                                                                                                                                                                                                                                                                                           | Matching Proteins in Your Input (Labels)                                                                                                                                                         |
|------------|-------------------------------------------|--------------|------------------|-----------|----------------------|--------|-------------------------------------------------------------------------------------------------------------------------------------------------------------------------------------------------------------------------------------------------------------------------------------------------------------------------------------------------------------------------------------------------------------------------------------------------------------------------------------------------------------------------------------------------------------------------------------------------------------------------------------------------------------------------------------------------|--------------------------------------------------------------------------------------------------------------------------------------------------------------------------------------------------|
| GO:0016266 | O-glycan processing                       | 9            | 4.81179          | top       | 0.00062              | afc    | 9606.ENSP00000169298,9606.ENSP00000287590,9606.ENSP00000355632,9606.ENSP00000360776,9606.ENSP00000381008,9606.ENSP00000414350,9606.ENSP00000417498,9606.ENSP00000436812,9606.ENSP00000484824                                                                                                                                                                                                                                                                                                                                                                                                                                                                                                    | ST6GAL1,B3GNT7,GALNT2,B4GALT5,MUC16,MUC20,MUC4,MUC5B,MUC1                                                                                                                                        |
| GO:0002673 | regulation of acute inflammatory response | 9            | 4.30565          | top       | 0.0027               | afc    | 9606.ENSP00000225698,9606.ENSP00000245907,9606.ENSP00000315130,9606.ENSP00000379191,9606.ENSP00000381607,9606.ENSP00000415941,9606.ENSP00000416561,9606.ENSP00000418770,9606.ENSP00000479488                                                                                                                                                                                                                                                                                                                                                                                                                                                                                                    | C1QBP,C3,CLU,CD59,GSTP1,C4B,CFB,PARK7,PHB                                                                                                                                                        |
| GO:0006956 | complement activation                     | 5            | 6.05752          | top       | 0.0027               | afc    | 9606.ENSP00000225698,9606.ENSP00000245907,9606.ENSP00000315130,9606.ENSP00000415941,9606.ENSP00000416561                                                                                                                                                                                                                                                                                                                                                                                                                                                                                                                                                                                        | C1QBP,C3,CLU,C4B,CFB                                                                                                                                                                             |
| GO:0030198 | extracellular matrix organization         | 32           | 1.7626           | top       | 0.0027               | ks     | 9606.ENSP00000007722,9606.ENSP00000200181,9606.ENSP00000218388,9606.ENSP00000260227,9606.ENSP00000260408,9606.ENSP00000261769,9606.ENSP00000264144,9606.ENSP00000265131,9606.ENSP00000279441,9606.ENSP00000288235,9606.ENSP00000296585,9606.ENSP00000324532,9606.ENSP00000325941,9606.ENSP00000342098,9606.ENSP00000345344,9606.ENSP00000346032,9606.ENSP00000355361,9606.ENSP00000357980,9606.ENSP00000357981,9606.ENSP00000358983,9606.ENSP00000361405,9606.ENSP00000363827,9606.ENSP00000365569,9606.ENSP00000368646,9606.ENSP00000368678,9606.ENSP00000369055,9606.ENSP00000372221,9606.ENSP00000375778,9606.ENSP00000386896,9606.ENSP00000416330,9606.ENSP00000427552,9606.ENSP00000434412 | ITGA3,ITGB4,TIMP1,MMP7,ADAM10,CDH1,LAMC2,TNXC,MMP10,MYO1E,ITGA2,LAMA3,RIC8A,SPINT1,CTSL,ANXA2,CD47,HTRA1,CTSS,NFKB2,MMP9,HSPG2,FLOT1,PRDX4,AGRN,B4GALT1,SERPINB5,LAMB3,ITGA6,TGFBI,DDR1,SERPINH1 |
| GO:0030449 | regulation of complement activation       | 7            | 5.02589          | top       | 0.0027               | afc    | 9606.ENSP00000225698,9606.ENSP00000245907,9606.ENSP00000315130,9606.ENSP00000379191,9606.ENSP00000415941,9606.ENSP00000416561,9606.ENSP00000479488                                                                                                                                                                                                                                                                                                                                                                                                                                                                                                                                              | C1QBP,C3,CLU,CD59,C4B,CFB,PHB                                                                                                                                                                    |
| GO:2000257 | regulation of protein activation cascade  | 7            | 5.02589          | top       | 0.0027               | afc    | 9606.ENSP00000225698,9606.ENSP00000245907,9606.ENSP00000315130,9606.ENSP00000379191,9606.ENSP00000415941,9606.ENSP00000416561,9606.ENSP00000479488                                                                                                                                                                                                                                                                                                                                                                                                                                                                                                                                              | C1QBP,C3,CLU,CD59,C4B,CFB,PHB                                                                                                                                                                    |
| GO:0009593 | detection of chemical stimulus            | 3            | 8.21595          | top       | 0.0029               | afc    | 9606.ENSP00000291009,9606.ENSP00000348888,9606.ENSP00000415941                                                                                                                                                                                                                                                                                                                                                                                                                                                                                                                                                                                                                                  | PIP,PIGR,C4B                                                                                                                                                                                     |

|            |                                       |    |         |     |        |     |                                                                                                                                                                                                                                                                                                                                                                                                                                                                                                                                                                                                                                                                                                                                                             |                                                                                                                                                                                                                   |
|------------|---------------------------------------|----|---------|-----|--------|-----|-------------------------------------------------------------------------------------------------------------------------------------------------------------------------------------------------------------------------------------------------------------------------------------------------------------------------------------------------------------------------------------------------------------------------------------------------------------------------------------------------------------------------------------------------------------------------------------------------------------------------------------------------------------------------------------------------------------------------------------------------------------|-------------------------------------------------------------------------------------------------------------------------------------------------------------------------------------------------------------------|
| GO:0043062 | extracellular structure organization  | 35 | 1.82148 | top | 0.003  | ks  | 9606.ENSP0000007722,9606.ENSP00000200181,9606.ENSP00000218388,9606.ENSP00000260227,9606.ENSP00000260408,9606.ENSP00000261769,9606.ENSP00000264144,9606.ENSP00000265131,9606.ENSP00000279441,9606.ENSP00000288235,9606.ENSP00000296585,9606.ENSP0000309591,9606.ENSP00000324532,9606.ENSP00000325941,9606.ENSP00000327801,9606.ENSP00000342098,9606.ENSP00000345344,9606.ENSP00000346032,9606.ENSP0000355361,9606.ENSP00000357980,9606.ENSP00000357981,9606.ENSP00000358983,9606.ENSP00000361405,9606.ENSP00000363827,9606.ENSP00000365569,9606.ENSP00000368646,9606.ENSP00000368678,9606.ENSP00000369055,9606.ENSP00000372221,9606.ENSP00000375778,9606.ENSP00000386896,9606.ENSP00000416330,9606.ENSP00000417138,9606.ENSP00000427552,9606.ENSP00000434412 | ITGA3,ITGB4,TIMP1,MMP7,ADAM10,CDH1,LAMC2,TN C,MMP10,MYO1E,ITGA2,PRKACA,LAMA3,RIC8A,P4HB,SPINT1,CTSL,ANXA2,CD47,HTRA1,CTSS,NFKB2,MMP9,HSPG2,FLOT1,PRDX4,AGRN,B4GALT1,SERPINB5,LAMB3,ITGA6,TGFBI,PLTP,DDR1,SERPINH1 |
| GO:0072376 | protein activation cascade            | 6  | 5.21514 | top | 0.003  | afc | 9606.ENSP00000225698,9606.ENSP00000245907,9606.ENSP00000315130,9606.ENSP00000377055,9606.ENSP0000415941,9606.ENSP00000416561                                                                                                                                                                                                                                                                                                                                                                                                                                                                                                                                                                                                                                | C1QBP,C3,CLU,PRCP,C4B,CFB                                                                                                                                                                                         |
| GO:0002920 | regulation of humoral immune response | 8  | 4.35141 | top | 0.0045 | afc | 9606.ENSP00000225698,9606.ENSP00000245907,9606.ENSP00000315130,9606.ENSP00000379191,9606.ENSP0000391592,9606.ENSP00000415941,9606.ENSP00000416561,9606.ENSP00000479488                                                                                                                                                                                                                                                                                                                                                                                                                                                                                                                                                                                      | C1QBP,C3,CLU,CD59,PTPN6,C4B,CFB,PHB                                                                                                                                                                               |
| GO:0006493 | protein O-linked glycosylation        | 11 | 3.57649 | top | 0.0045 | afc | 9606.ENSP00000169298,9606.ENSP00000247020,9606.ENSP00000287590,9606.ENSP00000355632,9606.ENSP0000360776,9606.ENSP00000381008,9606.ENSP00000414350,9606.ENSP00000417498,9606.ENSP00000425809,9606.ENSP00000436812,9606.ENSP00000484824                                                                                                                                                                                                                                                                                                                                                                                                                                                                                                                       | ST6GAL1,SDF2,B3GNT7,GALNT2,B4GALT5,MUC16,MUC20,MUC4,PGM3,MUC5B,MUC1                                                                                                                                               |

|            |                 |     |          |        |        |    |                                                                                                                                                                                                                                                                                                                                                                                                                                                                                                                                                                                                                                                                                                                                                                                                                                                                                                                                                                                                                                                                                                                                                                                                                                                                                                                                                                                                                                                                                                                                                                                                                                                 |                                                                                                                                                                                                                                                                                                                                                                                                                                                                                                                                                                                                                                                                                                                                                                                                                                                                                                                                                                                                                                                                                                                                                                                              |
|------------|-----------------|-----|----------|--------|--------|----|-------------------------------------------------------------------------------------------------------------------------------------------------------------------------------------------------------------------------------------------------------------------------------------------------------------------------------------------------------------------------------------------------------------------------------------------------------------------------------------------------------------------------------------------------------------------------------------------------------------------------------------------------------------------------------------------------------------------------------------------------------------------------------------------------------------------------------------------------------------------------------------------------------------------------------------------------------------------------------------------------------------------------------------------------------------------------------------------------------------------------------------------------------------------------------------------------------------------------------------------------------------------------------------------------------------------------------------------------------------------------------------------------------------------------------------------------------------------------------------------------------------------------------------------------------------------------------------------------------------------------------------------------|----------------------------------------------------------------------------------------------------------------------------------------------------------------------------------------------------------------------------------------------------------------------------------------------------------------------------------------------------------------------------------------------------------------------------------------------------------------------------------------------------------------------------------------------------------------------------------------------------------------------------------------------------------------------------------------------------------------------------------------------------------------------------------------------------------------------------------------------------------------------------------------------------------------------------------------------------------------------------------------------------------------------------------------------------------------------------------------------------------------------------------------------------------------------------------------------|
| GO:0006397 | mRNA processing | 158 | 0.316183 | bottom | 0.0061 | ks | <p>9606.ENSP00000215793,9606.ENSP00000215829,9606.E<br/> NSP00000216252,9606.ENSP00000216727,9606.ENSP000<br/> 00217109,9606.ENSP00000221419,9606.ENSP000002214<br/> 94,9606.ENSP00000225698,9606.ENSP00000225792,9606<br/> .ENSP00000227524,9606.ENSP00000228284,9606.ENSP00<br/> 000229390,9606.ENSP00000238112,9606.ENSP00000240<br/> 185,9606.ENSP00000242776,9606.ENSP00000243563,960<br/> 6.ENSP00000244020,9606.ENSP00000246194,9606.ENSP0<br/> 0000249299,9606.ENSP00000253363,9606.ENSP0000025<br/> 4108,9606.ENSP00000254193,9606.ENSP00000254301,96<br/> 06.ENSP00000258962,9606.ENSP00000261167,9606.ENSP<br/> 00000261531,9606.ENSP00000261973,9606.ENSP000002<br/> 62710,9606.ENSP00000263579,9606.ENSP00000263694,9<br/> 606.ENSP00000265866,9606.ENSP00000265872,9606.ENS<br/> P00000266079,9606.ENSP00000266679,9606.ENSP00000<br/> 269349,9606.ENSP00000276079,9606.ENSP00000283179,<br/> 9606.ENSP00000291552,9606.ENSP00000293677,9606.E<br/> NSP00000297071,9606.ENSP00000300291,9606.ENSP000<br/> 00300413,9606.ENSP00000301740,9606.ENSP000003021<br/> 60,9606.ENSP00000304903,9606.ENSP00000305556,9606<br/> .ENSP00000305790,9606.ENSP00000307863,9606.ENSP00<br/> 000309591,9606.ENSP00000310670,9606.ENSP00000310<br/> 723,9606.ENSP00000311677,9606.ENSP00000313007,960<br/> 6.ENSP00000313199,9606.ENSP00000313829,9606.ENSP0<br/> 0000316042,9606.ENSP00000317123,9606.ENSP0000031<br/> 8861,9606.ENSP00000319169,9606.ENSP00000324122,96<br/> 06.ENSP00000325376,9606.ENSP00000325377,9606.ENSP<br/> 00000325905,9606.ENSP00000326806,9606.ENSP000003<br/> 28848,9606.ENSP00000335321,9606.ENSP00000336741,9</p> | <p>SF3A1,SNRPD3,PHF5A,PABPN1,CSTF1,HNRNPL,SF3A2,<br/> C1QBP,DDX5,PRPF19,SART3,SRSF9,CPSF3,TARDBP,DD<br/> X39A,SNRPA,SRSF6,RALY,LSM8,RBM39,FUS,SNRPA1,L<br/> GALS3,SRSF1,WBP11,SNW1,RBM25,ACIN1,DCPS,SNR<br/> NP40,HNRNPH3,CCAR1,PRPF6,CPSF6,EIF4A3,NONO,H<br/> NRNPU,U2AFBP,RAVER1,TRA2A,NUDT21,SNRPD1,SRR<br/> M2,LSM3,CD2BP2,PCBP1,SF3B3,U2AF2,PRKACA,CCAR<br/> 2,DDX23,PPP1R8,PABPC1,HNRNPD,KHDRBS1,HNRNP<br/> A0,SNRNP200,SF3B2,PRMT5,PRPF31,HNRNPM,WDR3<br/> 3,SRSF7,NCBP2,RBM10,SF3B1,DHX15,FIP1L1,PRPF4B,<br/> SARNP,ZNF326,GTF2F2,HNRNPA1,SNRPD2,PSPC1,CPS<br/> F7,THRAP3,HNRNPA2B1,CGI-<br/> 74,SON,HNRNPH1,PTBP1,SFPQ,WTAP,PCBP2,CTNBL<br/> 1,CDC73,DHX9,ADAR,SYNCRIP,RBM15,AHCYL1,FMR1,<br/> RBMX,SRSF11,CDC5L,YBX1,HNRNPH2,CSTF2,SF3A3,SR<br/> SF3,PRPF4,HNRNPR,NCBP1,LSM2,HNRNPK,XRN2,SF1,<br/> POLR2B,DDX1,RNMT,HNRNPUL1,SRSF2,HNRNPA3,GT<br/> F2F1,DDX39B,DDX17,SMU1,KHSRP,KDM1A,NHP2L1,E<br/> LAVL1,PRPF40A,RBM4,RBM17,EFTUD2,STRAP,POLDIP<br/> 3,HNRNPF,SNRPE,PNPT1,ESRP1,SNRPB,PTBP3,DDX46,<br/> TRA2B,U2SURP,SRSF10,ALYREF,PLRG1,LUC7L3,HSPA8<br/> ,CLNS1A,PUF60,CHERP,HTATSF1,HNRNPC,SRSF5,RNP<br/> S1,PRPF8,RBM8A,DDX42,LSM4,SUPT5H,SNRNP70,POL<br/> R2A,SRRT,CPSF1</p> |
|------------|-----------------|-----|----------|--------|--------|----|-------------------------------------------------------------------------------------------------------------------------------------------------------------------------------------------------------------------------------------------------------------------------------------------------------------------------------------------------------------------------------------------------------------------------------------------------------------------------------------------------------------------------------------------------------------------------------------------------------------------------------------------------------------------------------------------------------------------------------------------------------------------------------------------------------------------------------------------------------------------------------------------------------------------------------------------------------------------------------------------------------------------------------------------------------------------------------------------------------------------------------------------------------------------------------------------------------------------------------------------------------------------------------------------------------------------------------------------------------------------------------------------------------------------------------------------------------------------------------------------------------------------------------------------------------------------------------------------------------------------------------------------------|----------------------------------------------------------------------------------------------------------------------------------------------------------------------------------------------------------------------------------------------------------------------------------------------------------------------------------------------------------------------------------------------------------------------------------------------------------------------------------------------------------------------------------------------------------------------------------------------------------------------------------------------------------------------------------------------------------------------------------------------------------------------------------------------------------------------------------------------------------------------------------------------------------------------------------------------------------------------------------------------------------------------------------------------------------------------------------------------------------------------------------------------------------------------------------------------|

|            |                                      |    |         |     |        |    |                                                                                                                                                                                                                                                                                                                                                                                                                                                                                                                                                                                                                                                                                                                                                                                                                                                                                                                                                                                                                                                                                                                                                   |                                                                                                                                                                                                                                                                                                       |
|------------|--------------------------------------|----|---------|-----|--------|----|---------------------------------------------------------------------------------------------------------------------------------------------------------------------------------------------------------------------------------------------------------------------------------------------------------------------------------------------------------------------------------------------------------------------------------------------------------------------------------------------------------------------------------------------------------------------------------------------------------------------------------------------------------------------------------------------------------------------------------------------------------------------------------------------------------------------------------------------------------------------------------------------------------------------------------------------------------------------------------------------------------------------------------------------------------------------------------------------------------------------------------------------------|-------------------------------------------------------------------------------------------------------------------------------------------------------------------------------------------------------------------------------------------------------------------------------------------------------|
| GO:0016999 | antibiotic metabolic process         | 49 | 1.00873 | top | 0.0061 | ks | <p>9606. ENSP00000169298,9606. ENSP00000216254,9606. ENSP00000222673,9606. ENSP00000229329,9606. ENSP00000235835,9606. ENSP00000241052,9606. ENSP00000253382,9606. ENSP00000253792,9606. ENSP00000261733,9606. ENSP00000262746,9606. ENSP00000264932,9606. ENSP00000265462,9606. ENSP00000270142,9606. ENSP00000280346,9606. ENSP00000285930,9606. ENSP00000296412,9606. ENSP00000297785,9606. ENSP00000298510,9606. ENSP00000299518,9606. ENSP00000301522,9606. ENSP00000307241,9606. ENSP00000309477,9606. ENSP00000317997,9606. ENSP00000321070,9606. ENSP00000327070,9606. ENSP00000331897,9606. ENSP00000335304,9606. ENSP00000342026,9606. ENSP00000342056,9606. ENSP00000352584,9606. ENSP00000355518,9606. ENSP00000364649,9606. ENSP00000367992,9606. ENSP00000369134,9606. ENSP00000369927,9606. ENSP00000370129,9606. ENSP00000370223,9606. ENSP00000377446,9606. ENSP00000378972,9606. ENSP00000390265,9606. ENSP00000391596,9606. ENSP00000407375,9606. ENSP00000418770,9606. ENSP00000419325,9606. ENSP00000420269,9606. ENSP00000426083,9606. ENSP00000438144,9606. ENSP00000473990,9606. ENSP00000477639</p>                      | <p>ST6GAL1,ACO2,OGDH,CMAS,AKR7A2,CAT,ACSS2,ACY,ALDH2,PRDX1,SDHA,PRDX5,SOD1,DLAT,AKR1B1,ADH5,ALDH1A1,PRDX3,IDH3A,PRDX2,PDHB,ACO1,DUOX1,ME2,MDH2,IDH2,DLST,PRDX6,CS,AKR1B10,FX,SDHB,ESD,PDHA1,AKR1C3,AKR1C2,IDH3B,SUCLG1,SULT1A1,IDH1,AMDHD2,GPX1,PARK7,SUCLG2,ADH7,ADH1C,MDH1,ALDH3B1,NAGK</p>         |
| GO:0097237 | cellular response to toxic substance | 50 | 1.04019 | top | 0.0061 | ks | <p>9606. ENSP0000012443,9606. ENSP00000216465,9606. ENSP00000216714,9606. ENSP00000217515,9606. ENSP00000221130,9606. ENSP00000223136,9606. ENSP00000226574,9606. ENSP00000241052,9606. ENSP00000250101,9606. ENSP00000262746,9606. ENSP00000265462,9606. ENSP00000270142,9606. ENSP00000278572,9606. ENSP00000287295,9606. ENSP00000296412,9606. ENSP00000298510,9606. ENSP00000300134,9606. ENSP00000301522,9606. ENSP00000317997,9606. ENSP00000319788,9606. ENSP00000335620,9606. ENSP00000337443,9606. ENSP00000341826,9606. ENSP00000342026,9606. ENSP00000346103,9606. ENSP00000346148,9606. ENSP00000349960,9606. ENSP00000356864,9606. ENSP00000357727,9606. ENSP00000358727,9606. ENSP00000363641,9606. ENSP00000366109,9606. ENSP00000367992,9606. ENSP00000368458,9606. ENSP00000368646,9606. ENSP00000373905,9606. ENSP00000376506,9606. ENSP00000378040,9606. ENSP00000379512,9606. ENSP00000381448,9606. ENSP00000381607,9606. ENSP00000384273,9606. ENSP00000407375,9606. ENSP00000413218,9606. ENSP00000418770,9606. ENSP00000430432,9606. ENSP00000431049,9606. ENSP00000434516,9606. ENSP00000446252,9606. ENSP00000482445</p> | <p>PPP5C,GSTZ1,APEX1,TXNL1,GSR,FIS1,NFKB1,CAT,TXNDC17,PRDX1,PRDX5,SOD1,RPS3,AIFM1,ADH5,PRDX3,STAT6,PRDX2,DUOX1,NQO1,GSTA1,NXN,HNRNPA1,PRDX6,GPX4,PRKAA1,ACTB,MGST3,S100A9,GSTO1,TXN,ANXA1,ESD,PCNA,PRDX4,DNM2,PDCC10,BAD,MGST1,CST3,GSTP1,RELA,GPX1,FAM213B,PARK7,HDAC2,GSTK1,TXNRD1,SOD2,FAM213A</p> |

|            |                                |     |          |        |        |     |                                                                                                                                                                                                                                                                                                                                                                                                                                                                                                                                                                                                                                                                                                                                                                                                                                                                                                                                                                                                                                                                                                                                                                                                                                                                                                                                                                                                                                                                                                                                                                                                                                                                                                                                                                                                                                                                                                                                                                                     |                                                                                                                                                                                                                                                                                                                                                                                                                                                                                                                                                                                                                                                                                                                                                                                                                                                                                                                                                                                                                                                                                                                                                           |
|------------|--------------------------------|-----|----------|--------|--------|-----|-------------------------------------------------------------------------------------------------------------------------------------------------------------------------------------------------------------------------------------------------------------------------------------------------------------------------------------------------------------------------------------------------------------------------------------------------------------------------------------------------------------------------------------------------------------------------------------------------------------------------------------------------------------------------------------------------------------------------------------------------------------------------------------------------------------------------------------------------------------------------------------------------------------------------------------------------------------------------------------------------------------------------------------------------------------------------------------------------------------------------------------------------------------------------------------------------------------------------------------------------------------------------------------------------------------------------------------------------------------------------------------------------------------------------------------------------------------------------------------------------------------------------------------------------------------------------------------------------------------------------------------------------------------------------------------------------------------------------------------------------------------------------------------------------------------------------------------------------------------------------------------------------------------------------------------------------------------------------------------|-----------------------------------------------------------------------------------------------------------------------------------------------------------------------------------------------------------------------------------------------------------------------------------------------------------------------------------------------------------------------------------------------------------------------------------------------------------------------------------------------------------------------------------------------------------------------------------------------------------------------------------------------------------------------------------------------------------------------------------------------------------------------------------------------------------------------------------------------------------------------------------------------------------------------------------------------------------------------------------------------------------------------------------------------------------------------------------------------------------------------------------------------------------|
| GO:0008380 | RNA splicing                   | 151 | 0.311357 | bottom | 0.0062 | ks  | 9606. ENSP00000215793, 9606. ENSP00000215829, 9606. ENSP00000216038, 9606. ENSP00000216252, 9606. ENSP00000216727, 9606. ENSP00000217109, 9606. ENSP00000221419, 9606. ENSP00000221494, 9606. ENSP00000225698, 9606. ENSP00000225792, 9606. ENSP00000227524, 9606. ENSP00000228284, 9606. ENSP00000229390, 9606. ENSP00000238112, 9606. ENSP00000240185, 9606. ENSP00000242776, 9606. ENSP00000243563, 9606. ENSP00000244020, 9606. ENSP00000246194, 9606. ENSP00000249299, 9606. ENSP00000253363, 9606. ENSP00000254108, 9606. ENSP00000254193, 9606. ENSP00000254301, 9606. ENSP00000258962, 9606. ENSP00000261167, 9606. ENSP00000261531, 9606. ENSP00000261700, 9606. ENSP00000261973, 9606. ENSP00000262710, 9606. ENSP00000263579, 9606. ENSP00000263694, 9606. ENSP00000265866, 9606. ENSP00000265872, 9606. ENSP00000266079, 9606. ENSP00000269349, 9606. ENSP00000276079, 9606. ENSP00000283179, 9606. ENSP00000291552, 9606. ENSP00000293677, 9606. ENSP00000297071, 9606. ENSP00000300291, 9606. ENSP00000300413, 9606. ENSP00000301740, 9606. ENSP00000302160, 9606. ENSP00000304903, 9606. ENSP00000305556, 9606. ENSP00000305790, 9606. ENSP00000306117, 9606. ENSP00000307863, 9606. ENSP00000310670, 9606. ENSP00000310723, 9606. ENSP00000311677, 9606. ENSP00000313007, 9606. ENSP00000313199, 9606. ENSP00000316042, 9606. ENSP00000317123, 9606. ENSP00000318861, 9606. ENSP00000319169, 9606. ENSP00000324122, 9606. ENSP00000324804, 9606. ENSP00000325376, 9606. ENSP00000325377, 9606. ENSP00000325905, 9606. ENSP00000326806, 9606. ENSP00000328848, 9606. ENSP00000335321, 9606. ENSP00000229239, 9606. ENSP00000253354, 9606. ENSP00000254301, 9606. ENSP00000315130, 9606. ENSP00000342082, 9606. ENSP00000346251, 9606. ENSP00000355315, 9606. ENSP00000357722, 9606. ENSP00000357727, 9606. ENSP00000357905, 9606. ENSP00000362108, 9606. ENSP00000379873, 9606. ENSP00000428085, 9606. ENSP00000435370, 9606. ENSP00000452780, 9606. ENSP00000470972 | SF3A1, SNRPD3, RTCB, PHF5A, PABPN1, CSTF1, HNRNPL, SF3A2, C1QBP, DDX5, PRPF19, SART3, SRSF9, CPSF3, TARDBP, DDX39A, SNRPA, SRSF6, RALY, LSM8, RBM39, FUS, SNRPA1, LGALS3, SRSF1, WBP11, SNW1, C14orf166, RBM25, ACIN1, DCPS, SNRNP40, HNRNPH3, CCAR1, PRPF6, EIF4A3, NONO, HNRNPU, U2AFB1, RAVER1, TRA2A, NUDT21, SNRPD1, SRRM2, LSM3, CD2BP2, PCBP1, SF3B3, DDX19A, U2AF2, CCAR2, DDX23, PPP1R8, PABPC1, HNRNPD, HNRNPAO, SNRNP200, SF3B2, PRMT5, PRPF31, PPP2R1A, HNRNPM, WDR33, SRSF7, NCBP2, RBM10, SF3B1, DHX15, FIP1L1, PRPF4B, ZNF326, GTF2F2, HNRNPA1, SNRPD2, PSCP1, CPSF7, THRAP3, HNRNPA2B1, CGI-74, SON, HNRNPH1, PTBP1, SFPQ, WTAP, PCBP2, CTNBL1, DHX9, SYNCRIP, RBM15, FMR1, RBMX, SRSF11, CDC5L, YBX1, HNRNPH2, CSTF2, SF3A3, SRSF3, PRPF4, HNRNPR, NCBP1, LSM2, HNRNPK, SF1, POLR2B, DDX1, HNRNPL1, SRSF2, HNRNPA3, GTF2F1, DDX39B, DDX17, SMU1, KHSP, KDM1A, NHP2L1, ELAVL1, PRPF40A, RBM4, RBM17, EFTUD2, STRAP, HNRNPF, SNRPE, ESRP1, SNRNPB, PTBP3, DDX46, TRA2B, PPP2CA, U2SURP, SRSF10, ALYREF, PLRG1, LUC7L3, HSPA8, CLNS1A, PUF60, CHERP, HTATSF1, HNRNPC, SRSF5, RNPS1, PRPF8, RBM8A, DDX42, LSM4, SNRNP70, POLR2A, SRRT, CPSF1 |
| GO:0019730 | antimicrobial humoral response | 16  | 2.69954  | top    | 0.0062 | afc | 9606. ENSP00000229239, 9606. ENSP00000253354, 9606. ENSP00000254301, 9606. ENSP00000315130, 9606. ENSP00000342082, 9606. ENSP00000346251, 9606. ENSP00000355315, 9606. ENSP00000357722, 9606. ENSP00000357727, 9606. ENSP00000357905, 9606. ENSP00000362108, 9606. ENSP00000379873, 9606. ENSP00000428085, 9606. ENSP00000435370, 9606. ENSP00000452780, 9606. ENSP00000470972                                                                                                                                                                                                                                                                                                                                                                                                                                                                                                                                                                                                                                                                                                                                                                                                                                                                                                                                                                                                                                                                                                                                                                                                                                                                                                                                                                                                                                                                                                                                                                                                      | GAPDH, BPIFB1, LGALS3, CLU, SLPI, BPIFA1, RPL39, S100A8, S100A9, DMBT1, LCN2, HLA-A, RPL30, FAU, B2M, RPS19                                                                                                                                                                                                                                                                                                                                                                                                                                                                                                                                                                                                                                                                                                                                                                                                                                                                                                                                                                                                                                               |

|            |                                          |    |          |     |        |     |                                                                                                                                                                                                                                                                                                                                                                                                                                                                                                                                                                                                                                                                                                                                                                                                                                                                                                                                                                                                                                                                                                                                                                                                                                                                                                                                                                                                                                                                                                                                                                               |                                                                                                                                                                                                                                                                                                                                                                                                                                                                                                                                                                                                                                                                         |
|------------|------------------------------------------|----|----------|-----|--------|-----|-------------------------------------------------------------------------------------------------------------------------------------------------------------------------------------------------------------------------------------------------------------------------------------------------------------------------------------------------------------------------------------------------------------------------------------------------------------------------------------------------------------------------------------------------------------------------------------------------------------------------------------------------------------------------------------------------------------------------------------------------------------------------------------------------------------------------------------------------------------------------------------------------------------------------------------------------------------------------------------------------------------------------------------------------------------------------------------------------------------------------------------------------------------------------------------------------------------------------------------------------------------------------------------------------------------------------------------------------------------------------------------------------------------------------------------------------------------------------------------------------------------------------------------------------------------------------------|-------------------------------------------------------------------------------------------------------------------------------------------------------------------------------------------------------------------------------------------------------------------------------------------------------------------------------------------------------------------------------------------------------------------------------------------------------------------------------------------------------------------------------------------------------------------------------------------------------------------------------------------------------------------------|
| GO:1990748 | cellular detoxification                  | 32 | 1.35613  | top | 0.0062 | ks  | 9606. ENSP00000216465,9606. ENSP00000217515,9606. ENSP00000221130,9606. ENSP00000241052,9606. ENSP00000250101,9606. ENSP00000262746,9606. ENSP00000265462,9606. ENSP00000270142,9606. ENSP00000296412,9606. ENSP00000298510,9606. ENSP00000301522,9606. ENSP00000317997,9606. ENSP00000319788,9606. ENSP00000335620,9606. ENSP00000337443,9606. ENSP00000342026,9606. ENSP00000346103,9606. ENSP00000356864,9606. ENSP00000357727,9606. ENSP00000358727,9606. ENSP00000363641,9606. ENSP00000367992,9606. ENSP00000368646,9606. ENSP00000379512,9606. ENSP00000381607,9606. ENSP00000407375,9606. ENSP00000413218,9606. ENSP00000418770,9606. ENSP00000431049,9606. ENSP00000434516,9606. ENSP00000446252,9606. ENSP00000482445                                                                                                                                                                                                                                                                                                                                                                                                                                                                                                                                                                                                                                                                                                                                                                                                                                               | GSTZ1, TXNL1, GSR, CAT, TXNDC17, PRDX1, PRDX5, SOD1, ADH5, PRDX3, PRDX2, DUOX1, NQO1, GSTA1, NXN, PRDX6, GPX4, MGST3, S100A9, GSTO1, TXN, ESD, PRDX4, MGST1, GSTP1, GPX1, FAM213B, PARK7, GSTK1, TXNRD1, SOD2, FAM213A                                                                                                                                                                                                                                                                                                                                                                                                                                                  |
| GO:0060627 | regulation of vesicle-mediated transport | 92 | 0.959664 | top | 0.0077 | ks  | 9606. ENSP00000161559,9606. ENSP00000215832,9606. ENSP00000220325,9606. ENSP00000230085,9606. ENSP00000238497,9606. ENSP00000239940,9606. ENSP00000245907,9606. ENSP00000247470,9606. ENSP00000250559,9606. ENSP00000252699,9606. ENSP00000253083,9606. ENSP00000254301,9606. ENSP00000260130,9606. ENSP00000261263,9606. ENSP00000262948,9606. ENSP00000263025,9606. ENSP00000263246,9606. ENSP00000263277,9606. ENSP00000263864,9606. ENSP00000264710,9606. ENSP00000265062,9606. ENSP00000265562,9606. ENSP00000268150,9606. ENSP00000269886,9606. ENSP00000296585,9606. ENSP00000303366,9606. ENSP00000304236,9606. ENSP00000307078,9606. ENSP00000310491,9606. ENSP00000312999,9606. ENSP00000314615,9606. ENSP00000315130,9606. ENSP00000320043,9606. ENSP00000320866,9606. ENSP00000331201,9606. ENSP00000333298,9606. ENSP00000333547,9606. ENSP00000337691,9606. ENSP00000345195,9606. ENSP00000346148,9606. ENSP00000348461,9606. ENSP00000351926,9606. ENSP00000352264,9606. ENSP00000353408,9606. ENSP00000354376,9606. ENSP00000355361,9606. ENSP00000356042,9606. ENSP00000359506,9606. ENSP00000361072,9606. ENSP00000362946,9606. ENSP00000365439,9606. ENSP00000365569,9606. ENSP00000366109,9606. ENSP00000366565,9606. ENSP00000366843,9606. ENSP00000370542,9606. ENSP00000373905,9606. ENSP00000376333,9606. ENSP00000377015,9606. ENSP00000377148,9606. ENSP00000378323,9606. ENSP00000378856,9606. ENSP00000381293,9606. ENSP00000384136,9606. ENSP00000390783,9606. ENSP00000291009,9606. ENSP00000348888,9606. ENSP00000360141,9606. ENSP00000481878 | CEACAM1, MAPK1, EHD4, SNX3, VPS4B, PFN2, C3, PYCARD, RAP1B, ACTN4, HIP1R, LGALS3, SDCBP, RAB21, MAP2K2, MAPK3, PACSIN2, EHD2, VAMP8, RAB10, RAB7A, PTPN23, MFGE8, SH3GL1, ITGA2, LMAN2, CD14, KIF5B, ARHGA P1, GNAI2, ARFGAP1, CLU, LYPLA1, CALR, HGS, LAMP1, RAB11B, MAPK15, UBQLN2, HMGB1, ANXA2, PRKAA1, RAC1, AP2A1, CD2AP, MSN, RAB25, CD47, EZR, FMR1, TSPAN1, RAB14, HNRNP, FLOT1, ANXA1, VPS28, ATXN2, SDC1, DN M2, LLLGL2, PICALM, AP1G1, PPP3CA, LGALS9, NSF, RDX, S CFD1, PPT1, CHMP3, PDCD6IP, STXBP2, C4B, CDK5, GNB2 L1, SEC24B, LYN, MYO18A, ARF1, ATP2A2, SYTL1, PACSIN3, RAB5C, CD63, DN M1L, B2M, ALOX15, ANKFY1, CHMP2 A, CAMK1D, EHD1, SNX12, AP2B1 |
| GO:0007606 | sensory perception of chemical stimulus  | 4  | 5.90005  | top | 0.009  | afc | PIP, PIGR, GNAS, GNB1                                                                                                                                                                                                                                                                                                                                                                                                                                                                                                                                                                                                                                                                                                                                                                                                                                                                                                                                                                                                                                                                                                                                                                                                                                                                                                                                                                                                                                                                                                                                                         |                                                                                                                                                                                                                                                                                                                                                                                                                                                                                                                                                                                                                                                                         |

T = 72 h, IFNα5: CoV-2 / mock

| #Term ID   | Term Description                          | Genes Mapped | Enrichment Score | Direction | False Discovery Rate | Method | Matching Proteins in Your Input (IDs)                                                                                                                                                                                                                                                                                                                                                                                                                                                                                                                             | Matching Proteins in Your Input (Labels)                                                                                                            |
|------------|-------------------------------------------|--------------|------------------|-----------|----------------------|--------|-------------------------------------------------------------------------------------------------------------------------------------------------------------------------------------------------------------------------------------------------------------------------------------------------------------------------------------------------------------------------------------------------------------------------------------------------------------------------------------------------------------------------------------------------------------------|-----------------------------------------------------------------------------------------------------------------------------------------------------|
| GO:0002673 | regulation of acute inflammatory response | 10           | 5.47022          | top       | 0.0000261            | afc    | 9606.ENSP00000225698,9606.ENSP00000245907,9606.ENSP00000315130,9606.ENSP00000356399,9606.ENSP00000379191,9606.ENSP00000381607,9606.ENSP00000415941,9606.ENSP00000416561,9606.ENSP00000418770,9606.ENSP00000479488                                                                                                                                                                                                                                                                                                                                                 | C1QBP,C3,CLU,CFH,CD59,GSTP1,C4B,CFB,PARK7,PHB                                                                                                       |
| GO:0002920 | regulation of humoral immune response     | 9            | 5.57206          | top       | 0.0000261            | afc    | 9606.ENSP00000225698,9606.ENSP00000245907,9606.ENSP00000315130,9606.ENSP00000356399,9606.ENSP00000379191,9606.ENSP00000391592,9606.ENSP00000415941,9606.ENSP00000416561,9606.ENSP00000479488                                                                                                                                                                                                                                                                                                                                                                      | C1QBP,C3,CLU,CFH,CD59,PTPN6,C4B,CFB,PHB                                                                                                             |
| GO:0006956 | complement activation                     | 6            | 7.14134          | top       | 0.0000261            | afc    | 9606.ENSP00000225698,9606.ENSP00000245907,9606.ENSP00000315130,9606.ENSP00000356399,9606.ENSP00000415941,9606.ENSP00000416561                                                                                                                                                                                                                                                                                                                                                                                                                                     | C1QBP,C3,CLU,CFH,C4B,CFB                                                                                                                            |
| GO:0030449 | regulation of complement activation       | 8            | 6.2269           | top       | 0.0000261            | afc    | 9606.ENSP00000225698,9606.ENSP00000245907,9606.ENSP00000315130,9606.ENSP00000356399,9606.ENSP00000379191,9606.ENSP00000415941,9606.ENSP00000416561,9606.ENSP00000479488                                                                                                                                                                                                                                                                                                                                                                                           | C1QBP,C3,CLU,CFH,CD59,C4B,CFB,PHB                                                                                                                   |
| GO:0072376 | protein activation cascade                | 7            | 6.11034          | top       | 0.0000261            | afc    | 9606.ENSP00000225698,9606.ENSP00000245907,9606.ENSP00000315130,9606.ENSP00000356399,9606.ENSP00000377055,9606.ENSP00000415941,9606.ENSP00000416561                                                                                                                                                                                                                                                                                                                                                                                                                | C1QBP,C3,CLU,CFH,PRCP,C4B,CFB                                                                                                                       |
| GO:2000257 | regulation of protein activation cascade  | 8            | 6.2269           | top       | 0.0000261            | afc    | 9606.ENSP00000225698,9606.ENSP00000245907,9606.ENSP00000315130,9606.ENSP00000356399,9606.ENSP00000379191,9606.ENSP00000415941,9606.ENSP00000416561,9606.ENSP00000479488                                                                                                                                                                                                                                                                                                                                                                                           | C1QBP,C3,CLU,CFH,CD59,C4B,CFB,PHB                                                                                                                   |
| GO:0016266 | O-glycan processing                       | 10           | 4.7641           | top       | 0.00013              | afc    | 9606.ENSP00000169298,9606.ENSP00000287590,9606.ENSP00000321874,9606.ENSP00000355632,9606.ENSP00000360776,9606.ENSP00000381008,9606.ENSP00000414350,9606.ENSP00000417498,9606.ENSP00000436812,9606.ENSP00000484824                                                                                                                                                                                                                                                                                                                                                 | ST6GAL1,B3GNT7,B3GNT3,GALNT2,B4GALT5,MUC16,MUC20,MUC4,MUC5B,MUC1                                                                                    |
| GO:0006959 | humoral immune response                   | 26           | 3.66066          | top       | 0.00031              | ks     | 9606.ENSP00000169298,9606.ENSP00000225698,9606.ENSP00000229239,9606.ENSP00000245907,9606.ENSP00000253354,9606.ENSP00000254301,9606.ENSP00000315130,9606.ENSP00000342082,9606.ENSP00000346251,9606.ENSP00000351314,9606.ENSP00000353099,9606.ENSP00000355315,9606.ENSP00000356399,9606.ENSP00000357722,9606.ENSP00000357727,9606.ENSP00000357905,9606.ENSP00000362108,9606.ENSP00000379873,9606.ENSP00000405573,9606.ENSP00000415941,9606.ENSP00000416561,9606.ENSP00000428085,9606.ENSP00000435370,9606.ENSP00000452780,9606.ENSP00000470972,9606.ENSP00000483599 | ST6GAL1,C1QBP,GAPDH,C3,BPIFB1,LGALS3,CLU,SLPI,BPIFA1,PSMB10,HLA-DRB1,RPL39,CFH,S100A8,S100A9,DMBT1,LCN2,HLA-A,GPI,C4B,CFB,RPL30,FAU,B2M,RPS19,SPON2 |
| GO:0019730 | antimicrobial humoral response            | 17           | 2.22974          | top       | 0.00031              | afc    | 9606.ENSP00000229239,9606.ENSP00000253354,9606.ENSP00000254301,9606.ENSP00000315130,9606.ENSP00000342082,9606.ENSP00000346251,9606.ENSP00000355315,9606.ENSP00000357722,9606.ENSP00000357727,9606.ENSP00000357905,9606.ENSP00000362108,9606.ENSP00000379873,9606.ENSP00000428085,9606.ENSP00000435370,9606.ENSP00000452780,9606.ENSP00000470972,9606.ENSP00000483599                                                                                                                                                                                              | GAPDH,BPIFB1,LGALS3,CLU,SLPI,BPIFA1,RPL39,S100A8,S100A9,DMBT1,LCN2,HLA-A,RPL30,FAU,B2M,RPS19,SPON2                                                  |



|            |                                            |     |          |        |         |     |                                                                                                                                                                                                                                                                                                                                                                                                                                                                                                                                                                                                                                                                                                                                                                                                                                                                                                                                                                                                                                                                                                                                                                                                                                                                                                                                                                                                                                                                                                                                                                                                                                                                                                                                                                                                                                                                                                                                                                                                                                                                                                                                                                       |                                                                                                                                                                                                                                                                                                                                                                                                                                                                                                                                                                                                                                                                                                                                                                                                                                                                                                                                                                                                                                                                                                                                                               |
|------------|--------------------------------------------|-----|----------|--------|---------|-----|-----------------------------------------------------------------------------------------------------------------------------------------------------------------------------------------------------------------------------------------------------------------------------------------------------------------------------------------------------------------------------------------------------------------------------------------------------------------------------------------------------------------------------------------------------------------------------------------------------------------------------------------------------------------------------------------------------------------------------------------------------------------------------------------------------------------------------------------------------------------------------------------------------------------------------------------------------------------------------------------------------------------------------------------------------------------------------------------------------------------------------------------------------------------------------------------------------------------------------------------------------------------------------------------------------------------------------------------------------------------------------------------------------------------------------------------------------------------------------------------------------------------------------------------------------------------------------------------------------------------------------------------------------------------------------------------------------------------------------------------------------------------------------------------------------------------------------------------------------------------------------------------------------------------------------------------------------------------------------------------------------------------------------------------------------------------------------------------------------------------------------------------------------------------------|---------------------------------------------------------------------------------------------------------------------------------------------------------------------------------------------------------------------------------------------------------------------------------------------------------------------------------------------------------------------------------------------------------------------------------------------------------------------------------------------------------------------------------------------------------------------------------------------------------------------------------------------------------------------------------------------------------------------------------------------------------------------------------------------------------------------------------------------------------------------------------------------------------------------------------------------------------------------------------------------------------------------------------------------------------------------------------------------------------------------------------------------------------------|
| GO:0006412 | translation                                | 161 | 0.689132 | bottom | 0.00083 | ks  | 9606. ENSP0000017742, 9606. ENSP00000216190, 9606. ENSP00000216554, 9606. ENSP00000220849, 9606. ENSP00000222247, 9606. ENSP00000223029, 9606. ENSP00000225430, 9606. ENSP00000230050, 9606. ENSP00000231572, 9606. ENSP00000233057, 9606. ENSP00000234677, 9606. ENSP00000248342, 9606. ENSP00000251453, 9606. ENSP00000253039, 9606. ENSP00000253099, 9606. ENSP00000253108, 9606. ENSP00000256383, 9606. ENSP00000256854, 9606. ENSP00000259469, 9606. ENSP00000261772, 9606. ENSP00000261868, 9606. ENSP00000262027, 9606. ENSP00000262584, 9606. ENSP00000264161, 9606. ENSP00000265753, 9606. ENSP00000266126, 9606. ENSP00000270625, 9606. ENSP00000272317, 9606. ENSP0000027572, 9606. ENSP00000281828, 9606. ENSP00000288937, 9606. ENSP00000289371, 9606. ENSP00000293831, 9606. ENSP00000296456, 9606. ENSP00000296577, 9606. ENSP00000296674, 9606. ENSP00000300648, 9606. ENSP00000301457, 9606. ENSP00000302896, 9606. ENSP00000307567, 9606. ENSP00000307889, 9606. ENSP00000307940, 9606. ENSP00000308275, 9606. ENSP00000309334, 9606. ENSP00000309830, 9606. ENSP00000311430, 9606. ENSP00000312311, 9606. ENSP00000313007, 9606. ENSP00000318646, 9606. ENSP00000320309, 9606. ENSP00000322419, 9606. ENSP00000322439, 9606. ENSP00000325448, 9606. ENSP00000326381, 9606. ENSP00000331901, 9606. ENSP00000332604, 9606. ENSP00000336702, 9606. ENSP00000336721, 9606. ENSP00000339063, 9606. ENSP00000339095, 9606. ENSP00000339795, 9606. ENSP00000341885, 9606. ENSP00000343885, 9606. ENSP00000345957, 9606. ENSP00000346001, 9606. ENSP00000346015, 9606. ENSP00000346027, 9606. ENSP00000346037, 9606. ENSP00000346046, 9606. ENSP00000346050, 9606. ENSP00000346067, 9606. ENSP00000346088, 9606. ENSP00000347495, 9606. ENSP00000348849, 9606. ENSP00000350512, 9606. ENSP0000035359606. ENSP00000216181, 9606. ENSP00000217131, 9606. ENSP00000225698, 9606. ENSP00000234590, 9606. ENSP00000245907, 9606. ENSP00000315130, 9606. ENSP00000356399, 9606. ENSP00000362924, 9606. ENSP00000379157, 9606. ENSP00000379191, 9606. ENSP00000415941, 9606. ENSP00000416561, 9606. ENSP00000457243, 9606. ENSP00000479488, 9606. ENSP00000481314 | MRPS34, EIF3D, EIF5, EIF3E, RPL18A, AIMP2, RPL19, RPS12, RARS, EIF2AK2, SARS, EIF3K, RPS16, EIF2S3, MRPL4, EIF3G, EIF2S1, NARS, RPL35, AARS, EIF3J, MARS, RPL8, DARS, EIF4H, EIF2B2, RPS11, RPS27A, RPS3, FARSB, MRPL17, EIF5B, EIF4A1, APEH, ABCE1, RPS23, GCN1L1, NDUFA7, RPS9, QARS, RPL13, EEF2, MRPL38, RPL15, RPL38, RPL4, MRPL46, PABPC1, RPS15A, FARSA, RPLP2, TUFM, KARS, EIF4A2, EEF1G, EIF3C, EIF5A, LARP1, EEF1A1, RPS7, RPL7, RPS2, PPA2, RPS21, RPL3, RPL27A, RPL21, RPLP1, RPS17, RPS3A, RPSA, RPL22, WARS, RPS26, COPS5, EIF2B3, ETF1, EIF3B, RPL12, RPL39, IARS2, EPRS, RPS27, EIF3A, RPL5, MCTS1, MRPS2, RPL7A, MRPL14, MRPS18A, PABPC4, PPA1, YARS, EIF3I, RPS4X, RPL10A, EIF6, RPL11, EIF2S2, IARS, VARS, RRBP1, EEF1E1, RPS6, CARS, GARS, RPL13A, EEF1B2, RPL24, LARS, RPL34, AIMP1, RPL14, RPS8, RPL23L, LARP4, DDX3X, RPS14, RPL31, RBM4, TARS, EIF4B, RPL23A, RPS18, EIF2B4, RPL17, GSPT1, RPL9, AARSD1, RPL6, EEF1D, RPL10, RPS24, EIF4G1, RPL32, EIF2A, RPL29, RPL35A, RPL23, EIF4E, HARS, GNB2L1, RPL30, RPS20, EIF3F, EIF4G2, RPS25, FAU, RPS13, RPL18, NACA, RPLP0, RPL28, RPL26, RPL36, RPL27, RPS19, RPS28, RPS5, RPS10, EIF3L |
| GO:0070613 | regulation of protein processing           | 15  | 3.38208  | top    | 0.00085 | afc | 9606. ENSP00000216181, 9606. ENSP00000217131, 9606. ENSP00000225698, 9606. ENSP00000234590, 9606. ENSP00000245907, 9606. ENSP00000315130, 9606. ENSP00000356399, 9606. ENSP00000362924, 9606. ENSP00000379157, 9606. ENSP00000379191, 9606. ENSP00000415941, 9606. ENSP00000416561, 9606. ENSP00000457243, 9606. ENSP00000479488, 9606. ENSP00000481314                                                                                                                                                                                                                                                                                                                                                                                                                                                                                                                                                                                                                                                                                                                                                                                                                                                                                                                                                                                                                                                                                                                                                                                                                                                                                                                                                                                                                                                                                                                                                                                                                                                                                                                                                                                                               | MYH9, CTSZ, C1QBP, ENO1, C3, CLU, CFH, GSN, CAST, CD59, C4B, CFB, NOL3, PHB, SNX12                                                                                                                                                                                                                                                                                                                                                                                                                                                                                                                                                                                                                                                                                                                                                                                                                                                                                                                                                                                                                                                                            |
| GO:0002385 | mucosal immune response                    | 5   | 4.46358  | top    | 0.0012  | afc | 9606. ENSP00000253354, 9606. ENSP00000346251, 9606. ENSP00000348888, 9606. ENSP00000355315, 9606. ENSP00000435370                                                                                                                                                                                                                                                                                                                                                                                                                                                                                                                                                                                                                                                                                                                                                                                                                                                                                                                                                                                                                                                                                                                                                                                                                                                                                                                                                                                                                                                                                                                                                                                                                                                                                                                                                                                                                                                                                                                                                                                                                                                     | BPIFB1, BPIFA1, PIGR, RPL39, FAU                                                                                                                                                                                                                                                                                                                                                                                                                                                                                                                                                                                                                                                                                                                                                                                                                                                                                                                                                                                                                                                                                                                              |
| GO:0006493 | protein O-linked glycosylation             | 12  | 3.79932  | top    | 0.0012  | afc | 9606. ENSP00000169298, 9606. ENSP00000247020, 9606. ENSP00000287590, 9606. ENSP00000321874, 9606. ENSP00000355632, 9606. ENSP00000360776, 9606. ENSP00000381008, 9606. ENSP00000414350, 9606. ENSP00000417498, 9606. ENSP00000425809, 9606. ENSP00000436812, 9606. ENSP00000484824                                                                                                                                                                                                                                                                                                                                                                                                                                                                                                                                                                                                                                                                                                                                                                                                                                                                                                                                                                                                                                                                                                                                                                                                                                                                                                                                                                                                                                                                                                                                                                                                                                                                                                                                                                                                                                                                                    | ST6GAL1, SDF2, B3GNT7, B3GNT3, GALNT2, B4GALT5, MUC16, MUC20, MUC4, PGM3, MUC5B, MUC1                                                                                                                                                                                                                                                                                                                                                                                                                                                                                                                                                                                                                                                                                                                                                                                                                                                                                                                                                                                                                                                                         |
| GO:0009593 | detection of chemical stimulus             | 3   | 8.27984  | top    | 0.0012  | afc | 9606. ENSP00000291009, 9606. ENSP00000348888, 9606. ENSP00000415941                                                                                                                                                                                                                                                                                                                                                                                                                                                                                                                                                                                                                                                                                                                                                                                                                                                                                                                                                                                                                                                                                                                                                                                                                                                                                                                                                                                                                                                                                                                                                                                                                                                                                                                                                                                                                                                                                                                                                                                                                                                                                                   | PIP, PIGR, C4B                                                                                                                                                                                                                                                                                                                                                                                                                                                                                                                                                                                                                                                                                                                                                                                                                                                                                                                                                                                                                                                                                                                                                |
| GO:0019731 | antibacterial humoral response             | 8   | 3.15967  | top    | 0.0014  | afc | 9606. ENSP00000342082, 9606. ENSP00000346251, 9606. ENSP00000355315, 9606. ENSP00000357905, 9606. ENSP00000379873, 9606. ENSP00000435370, 9606. ENSP00000452780, 9606. ENSP00000483599                                                                                                                                                                                                                                                                                                                                                                                                                                                                                                                                                                                                                                                                                                                                                                                                                                                                                                                                                                                                                                                                                                                                                                                                                                                                                                                                                                                                                                                                                                                                                                                                                                                                                                                                                                                                                                                                                                                                                                                | SLPI, BPIFA1, RPL39, DMBT1, HLA-A, FAU, B2M, SPON2                                                                                                                                                                                                                                                                                                                                                                                                                                                                                                                                                                                                                                                                                                                                                                                                                                                                                                                                                                                                                                                                                                            |
| GO:0006957 | complement activation, alternative pathway | 3   | 8.18558  | top    | 0.0015  | afc | 9606. ENSP00000245907, 9606. ENSP00000356399, 9606. ENSP00000416561                                                                                                                                                                                                                                                                                                                                                                                                                                                                                                                                                                                                                                                                                                                                                                                                                                                                                                                                                                                                                                                                                                                                                                                                                                                                                                                                                                                                                                                                                                                                                                                                                                                                                                                                                                                                                                                                                                                                                                                                                                                                                                   | C3, CFH, CFB                                                                                                                                                                                                                                                                                                                                                                                                                                                                                                                                                                                                                                                                                                                                                                                                                                                                                                                                                                                                                                                                                                                                                  |

|            |                                          |     |          |        |        |     |                                                                                                                                                                                                                                                                                                                                                                                                                                                                                                                                                                                                                                                                                                                                                                                                                                                                                                                                                                                                                                                                                                                                                                                                                                                                                                                                                                                                                                                                                                                                                                                                                                                                                                                                              |                                                                                                                                                                                                                                                                                                                                                                                                                                                                                                                                                                                                                                                                  |
|------------|------------------------------------------|-----|----------|--------|--------|-----|----------------------------------------------------------------------------------------------------------------------------------------------------------------------------------------------------------------------------------------------------------------------------------------------------------------------------------------------------------------------------------------------------------------------------------------------------------------------------------------------------------------------------------------------------------------------------------------------------------------------------------------------------------------------------------------------------------------------------------------------------------------------------------------------------------------------------------------------------------------------------------------------------------------------------------------------------------------------------------------------------------------------------------------------------------------------------------------------------------------------------------------------------------------------------------------------------------------------------------------------------------------------------------------------------------------------------------------------------------------------------------------------------------------------------------------------------------------------------------------------------------------------------------------------------------------------------------------------------------------------------------------------------------------------------------------------------------------------------------------------|------------------------------------------------------------------------------------------------------------------------------------------------------------------------------------------------------------------------------------------------------------------------------------------------------------------------------------------------------------------------------------------------------------------------------------------------------------------------------------------------------------------------------------------------------------------------------------------------------------------------------------------------------------------|
| GO:0006413 | translational initiation                 | 107 | 0.849951 | bottom | 0.0019 | ks  | 9606.ENSP00000216190,9606.ENSP00000216554,9606.ENSP00000220849,9606.ENSP00000222247,9606.ENSP00000225430,9606.ENSP00000230050,9606.ENSP00000248342,9606.ENSP00000251453,9606.ENSP00000253039,9606.ENSP00000253108,9606.ENSP00000256383,9606.ENSP00000259469,9606.ENSP00000261868,9606.ENSP00000262584,9606.ENSP00000265753,9606.ENSP00000266126,9606.ENSP00000270625,9606.ENSP00000272317,9606.ENSP00000278572,9606.ENSP00000289371,9606.ENSP00000293831,9606.ENSP00000296577,9606.ENSP00000296674,9606.ENSP00000302896,9606.ENSP00000307889,9606.ENSP00000309334,9606.ENSP00000309830,9606.ENSP00000311430,9606.ENSP00000313007,9606.ENSP00000318646,9606.ENSP00000322419,9606.ENSP00000326381,9606.ENSP00000332604,9606.ENSP00000336721,9606.ENSP00000339095,9606.ENSP00000339795,9606.ENSP00000341885,9606.ENSP00000345957,9606.ENSP00000346001,9606.ENSP00000346015,9606.ENSP00000346027,9606.ENSP00000346037,9606.ENSP00000346046,9606.ENSP00000346050,9606.ENSP00000346067,9606.ENSP00000346088,9606.ENSP00000348849,9606.ENSP00000350512,9606.ENSP00000353575,9606.ENSP00000354125,9606.ENSP00000354739,9606.ENSP00000355315,9606.ENSP00000357555,9606.ENSP00000358140,9606.ENSP00000359345,9606.ENSP00000360365,9606.ENSP00000361076,9606.ENSP00000362688,9606.ENSP00000362744,9606.ENSP00000363018,9606.ENSP00000363574,9606.ENSP00000363676,9606.ENSP00000364119,9606.ENSP00000369757,9606.ENSP00000375730,9606.ENSP00000377640,9606.ENSP00000378163,9606.ENSP00000379506,9606.ENSP00000379888,9606.ENSP00000382840,9606.ENSP00000385958,9606.ENSP00000386717,9606.ENSP00000386894,9606.ENSP00000388806,9606.ENSP00000389103,9606.ENSP0000039329606.ENSP00000225698,9606.ENSP00000245907,9606.ENSP00000315130,9606.ENSP00000415941 | EIF3D,EIF5,EIF3E,RPL18A,RPL19,RPS12,EIF3K,RPS16,EIF2S3,EIF3G,EIF2S1,RPL35,EIF3J,RPL8,EIF4H,EIF2B2,RPS11,RPS27A,RPS3,EIF5B,EIF4A1,ABCE1,RPS23,RPS9,RPL13,RPL15,RPL38,RPL4,PABPC1,RPS15A,RPLP2,EIF4A2,EIF3C,LARP1,RPS7,RPL7,RPS2,RPS21,RPL3,RPL27A,RPL21,RPLP1,RPS17,RPS3A,RPSA,RPL22,RPS26,COP55,EIF2B3,EIF3B,RPL12,RPL39,RPS27,EIF3A,RPL5,MCTS1,RPL7A,EIF3I,RPS4X,RPL10A,EIF6,RPL11,EIF2S2,RPS6,RPL13A,RPL24,RPL34,RPL14,RPS8,DDX3X,RPS14,RPL31,RBM4,EIF4B,RPL23A,RPS18,EIF2B4,RPL17,RPL9,RPL6,RPL10,RPS24,EIF4G1,RPL32,EIF2A,RPL29,RPL35A,RPL23,EIF4E,RPL30,RPS20,EIF3F,EIF4G2,RPS25,FAU,RPS13,RPL18,RPLP0,RPL28,RPL26,RPL36,RPL27,RPS19,RPS28,RPS5,RPS10,EIF3L |
| GO:0006958 | complement activation, classical pathway | 4   | 6.62481  | top    | 0.003  | afc | C1QB, C3, CLU, C4B                                                                                                                                                                                                                                                                                                                                                                                                                                                                                                                                                                                                                                                                                                                                                                                                                                                                                                                                                                                                                                                                                                                                                                                                                                                                                                                                                                                                                                                                                                                                                                                                                                                                                                                           |                                                                                                                                                                                                                                                                                                                                                                                                                                                                                                                                                                                                                                                                  |

|            |                              |     |          |        |        |                                                                                                                                                                                                                                                                                                                                                                                                                                                                                                                                                                                                                                                                                                                                                                                                                                                                                                                                                                                                                                                                                                                                                                                                                                                                                                                                                                                                                                                                                                                                                                                                                                                                 |                                                                                                                                                                                                                                                                                                                                                                                                                                                                                                                                                                                                                                                                                                                                                                                                                                                                                                                                                                                                                                         |
|------------|------------------------------|-----|----------|--------|--------|-----------------------------------------------------------------------------------------------------------------------------------------------------------------------------------------------------------------------------------------------------------------------------------------------------------------------------------------------------------------------------------------------------------------------------------------------------------------------------------------------------------------------------------------------------------------------------------------------------------------------------------------------------------------------------------------------------------------------------------------------------------------------------------------------------------------------------------------------------------------------------------------------------------------------------------------------------------------------------------------------------------------------------------------------------------------------------------------------------------------------------------------------------------------------------------------------------------------------------------------------------------------------------------------------------------------------------------------------------------------------------------------------------------------------------------------------------------------------------------------------------------------------------------------------------------------------------------------------------------------------------------------------------------------|-----------------------------------------------------------------------------------------------------------------------------------------------------------------------------------------------------------------------------------------------------------------------------------------------------------------------------------------------------------------------------------------------------------------------------------------------------------------------------------------------------------------------------------------------------------------------------------------------------------------------------------------------------------------------------------------------------------------------------------------------------------------------------------------------------------------------------------------------------------------------------------------------------------------------------------------------------------------------------------------------------------------------------------------|
| GO:0043043 | peptide biosynthetic process | 169 | 0.652961 | bottom | 0.0033 | ks<br>9606.ENSP00000177742,9606.ENSP00000216190,9606.ENSP00000216554,9606.ENSP00000216951,9606.ENSP00000220849,9606.ENSP00000222247,9606.ENSP00000223029,9606.ENSP00000225430,9606.ENSP00000229416,9606.ENSP00000230050,9606.ENSP00000231572,9606.ENSP00000233057,9606.ENSP00000234677,9606.ENSP00000248342,9606.ENSP00000251453,9606.ENSP00000253039,9606.ENSP00000253099,9606.ENSP00000253108,9606.ENSP00000256383,9606.ENSP00000256854,9606.ENSP00000259469,9606.ENSP00000261772,9606.ENSP00000261868,9606.ENSP00000262027,9606.ENSP00000262584,9606.ENSP00000264161,9606.ENSP00000265753,9606.ENSP00000266126,9606.ENSP00000270625,9606.ENSP00000272317,9606.ENSP00000275428,9606.ENSP00000278572,9606.ENSP00000281828,9606.ENSP00000288937,9606.ENSP00000289371,9606.ENSP00000293831,9606.ENSP00000296424,9606.ENSP00000296456,9606.ENSP00000296577,9606.ENSP00000296674,9606.ENSP00000300648,9606.ENSP00000301457,9606.ENSP00000302896,9606.ENSP00000307567,9606.ENSP00000307889,9606.ENSP00000307940,9606.ENSP00000308275,9606.ENSP00000309334,9606.ENSP00000309830,9606.ENSP00000311430,9606.ENSP00000312311,9606.ENSP00000313007,9606.ENSP00000318646,9606.ENSP00000320309,9606.ENSP00000322419,9606.ENSP00000322439,9606.ENSP00000325448,9606.ENSP00000325548,9606.ENSP00000326381,9606.ENSP00000331901,9606.ENSP00000332604,9606.ENSP00000336702,9606.ENSP00000336721,9606.ENSP00000339063,9606.ENSP00000339095,9606.ENSP00000339795,9606.ENSP00000341885,9606.ENSP00000343885,9606.ENSP00000345957,9606.ENSP00000346001,9606.ENSP00000346015,9606.ENSP00000346027,9606.ENSP00000346037,9606.ENSP00000346046,9606.ENSP00000346050,9606.ENSP000003460 | MRPS34,EIF3D,EIF5,GSS,EIF3E,RPL18A,AIMP2,RPL19,GCLC,RPS12,RARS,EIF2AK2,SARS,EIF3K,RPS16,EIF2S3,MRPL4,EIF3G,EIF2S1,NARS,RPL35,AARS,EIF3J,MARS,RPL8,DARS,EIF4H,EIF2B2,RPS11,RPS27A,GGCT,RPS3,FARSB,MRPL17,EIF5B,EIF4A1,BDH2,APEH,ABCE1,RPS23,GCN1L1,NDUFA7,RPS9,QARS,RPL13,EEF2,MRPL38,RPL15,RPL38,RPL4,MRPL46,PABPC1,RPS15A,FARSA,RPLP2,TUFM,KARS,CNDP2,EIF4A2,EEF1G,EIF3C,EIF5A,LARP1,EEF1A1,RPS7,RPL7,RPS2,PPA2,RPS21,RPL3,RPL27A,RPL21,RPLP1,RPS17,RPS3A,RPSA,RPL22,WARS,RPS26,COP55,EIF2B3,ETF1,EIF3B,RPL12,RPL39,IARS2,EPRS,RPS27,EIF3A,GC LM,RPL5,MCTS1,MRPS2,RPL7A,MRPL14,MRPS18A,PABPC4,PPA1,YARS,EIF3I,RPS4X,RPL10A,EIF6,RPL11,EIF2S2,IARS,VARS,RRBP1,EEF1E1,RPS6,CARS,GARS,RPL13A,EEF1B2,RPL24,LARS,RPL34,AIMP1,RPL14,RPS8,RPL23L,HAGH,LARP4,DDX3X,RPS14,RPL31,RBM4,TARS,EIF4B,RPL23A,RPS18,EIF2B4,RPL17,GSPT1,RPL9,AARSD1,RPL6,EEF1D,RPL10,RPS24,EIF4G1,RPL32,EIF2A,RPL29,RPL35A,RPL23,EIF4E,HARS,GNB2L1,RPL30,RPS20,EIF3F,EIF4G2,RPS25,FAU,RPS13,RPL18,NACA,RPLP0,RPL28,RPL26,RPL36,RPL27,RPS19,RPS28,RPS5,OPLAH,RPS10,EIF3L |
|------------|------------------------------|-----|----------|--------|--------|-----------------------------------------------------------------------------------------------------------------------------------------------------------------------------------------------------------------------------------------------------------------------------------------------------------------------------------------------------------------------------------------------------------------------------------------------------------------------------------------------------------------------------------------------------------------------------------------------------------------------------------------------------------------------------------------------------------------------------------------------------------------------------------------------------------------------------------------------------------------------------------------------------------------------------------------------------------------------------------------------------------------------------------------------------------------------------------------------------------------------------------------------------------------------------------------------------------------------------------------------------------------------------------------------------------------------------------------------------------------------------------------------------------------------------------------------------------------------------------------------------------------------------------------------------------------------------------------------------------------------------------------------------------------|-----------------------------------------------------------------------------------------------------------------------------------------------------------------------------------------------------------------------------------------------------------------------------------------------------------------------------------------------------------------------------------------------------------------------------------------------------------------------------------------------------------------------------------------------------------------------------------------------------------------------------------------------------------------------------------------------------------------------------------------------------------------------------------------------------------------------------------------------------------------------------------------------------------------------------------------------------------------------------------------------------------------------------------------|

|            |                            |     |         |        |        |                                                                                                                                                                                                                                                                                                                                                                                                                                                                                                                                                                                                                                                                                                                                                                                                                                                                                                                                                                                                                                                                                                                                                                                                                                                                                                                                                                                                                                                                                                                                                                                                                                                                 |                                                                                                                                                                                                                                                                                                                                                                                                                                                                                                                                                                                                                                                                                                                                                                                                                                                                                                                                                                                                                                                                                                                                           |
|------------|----------------------------|-----|---------|--------|--------|-----------------------------------------------------------------------------------------------------------------------------------------------------------------------------------------------------------------------------------------------------------------------------------------------------------------------------------------------------------------------------------------------------------------------------------------------------------------------------------------------------------------------------------------------------------------------------------------------------------------------------------------------------------------------------------------------------------------------------------------------------------------------------------------------------------------------------------------------------------------------------------------------------------------------------------------------------------------------------------------------------------------------------------------------------------------------------------------------------------------------------------------------------------------------------------------------------------------------------------------------------------------------------------------------------------------------------------------------------------------------------------------------------------------------------------------------------------------------------------------------------------------------------------------------------------------------------------------------------------------------------------------------------------------|-------------------------------------------------------------------------------------------------------------------------------------------------------------------------------------------------------------------------------------------------------------------------------------------------------------------------------------------------------------------------------------------------------------------------------------------------------------------------------------------------------------------------------------------------------------------------------------------------------------------------------------------------------------------------------------------------------------------------------------------------------------------------------------------------------------------------------------------------------------------------------------------------------------------------------------------------------------------------------------------------------------------------------------------------------------------------------------------------------------------------------------------|
| GO:0043604 | amide biosynthetic process | 188 | 0.63863 | bottom | 0.0067 | ks<br>9606.ENSP00000175506,9606.ENSP00000177742,9606.ENSP00000205402,9606.ENSP00000215567,9606.ENSP00000215882,9606.ENSP00000216190,9606.ENSP00000216554,9606.ENSP00000216605,9606.ENSP00000216951,9606.ENSP00000220849,9606.ENSP00000222247,9606.ENSP00000223029,9606.ENSP00000225430,9606.ENSP00000229416,9606.ENSP00000230050,9606.ENSP00000231572,9606.ENSP00000233057,9606.ENSP00000234677,9606.ENSP00000236959,9606.ENSP00000248342,9606.ENSP00000251453,9606.ENSP00000253039,9606.ENSP00000253099,9606.ENSP00000253108,9606.ENSP00000253382,9606.ENSP00000253792,9606.ENSP00000256383,9606.ENSP00000256854,9606.ENSP00000259469,9606.ENSP00000261772,9606.ENSP00000261868,9606.ENSP00000262027,9606.ENSP00000262584,9606.ENSP00000264161,9606.ENSP00000265753,9606.ENSP00000265838,9606.ENSP00000266126,9606.ENSP00000270625,9606.ENSP00000272317,9606.ENSP00000275428,9606.ENSP00000278572,9606.ENSP00000280346,9606.ENSP00000281828,9606.ENSP00000288937,9606.ENSP00000289371,9606.ENSP00000293831,9606.ENSP00000296424,9606.ENSP00000296456,9606.ENSP00000296577,9606.ENSP00000296674,9606.ENSP00000300648,9606.ENSP00000301457,9606.ENSP00000302896,9606.ENSP00000304592,9606.ENSP00000307188,9606.ENSP00000307241,9606.ENSP00000307567,9606.ENSP00000307889,9606.ENSP00000307940,9606.ENSP00000308275,9606.ENSP00000309334,9606.ENSP00000309830,9606.ENSP00000311430,9606.ENSP00000312311,9606.ENSP00000313007,9606.ENSP00000314508,9606.ENSP00000318646,9606.ENSP00000320309,9606.ENSP00000322419,9606.ENSP00000322439,9606.ENSP00000325448,9606.ENSP00000325548,9606.ENSP00000326381,9606.ENSP00000331901,9606.ENSP00000332604,9606.ENSP000003367 | ASNS,MRPS34,DLD,TECR,SLC25A1,EIF3D,EIF5,MTHFD1,GSS,EIF3E,RPL18A,AIMP2,RPL19,GCLC,RPS12,RARS,EIF2AK2,SARS,ATIC,EIF3K,RPS16,EIF2S3,MRPL4,EIF3G,ACSS2,ACLY,EIF2S1,NARS,RPL35,AARS,EIF3J,MARS,RPL8,DARS,EIF4H,ACAT1,EIF2B2,RPS11,RPS27A,GGCT,RPS3,DLAT,FARSB,MRPL17,EIF5B,EIF4A1,BDH2,APEH,ABCE1,RPS23,GCN1L1,NDUFA7,RPS9,FASN,ASL,PDHB,QARS,RPL13,EEF2,MRPL38,RPL15,RPL38,RPL4,MRPL46,PABPC1,GBA,RPS15A,FARSA,RPLP2,TUFM,KARS,CNDP2,EIF4A2,EEF1G,EIF3C,EIF5A,LARP1,EEF1A1,RPS7,RPL7,RPS2,PPA2,RPS21,RPL3,RPL27A,RPL21,RPL1,RPS17,RPS3A,RPSA,RPL22,WARS,RPS26,COP55,EIF2B3,ETF1,EIF3B,RPL12,RPL39,IARS2,EPRS,RPS27,EIF3A,GCLM,RPL5,MCTS1,MRPS2,RPL7A,MRPL14,MRPS18A,ASS1,PABPC4,PPA1,YARS,EIF3I,RPS4X,RPL10A,EIF6,RPL11,EIF2S2,IARS,VAR,RRBP1,EEF1E1,PDHA1,RPS6,CARS,GART,GARS,RPL13A,EEF1B2,RPL24,LARS,RPL34,AIMP1,RPL14,RPS8,RPL23L,HAGH,LARP4,DDX3X,RPS14,RPL31,RBM4,TARS,EIF4B,RPL23A,RPS18,PPT1,EIF2B4,RPL17,GSPT1,RPL9,AARSD1,RPL6,EEF1D,RPL10,RPS24,EIF4G1,RPL32,EIF2A,RPL29,RPL35A,RPL23,ACSL1,EIF4E,HARS,GNB2L1,RPL30,RPS20,EIF3F,EIF4G2,RPS25,FAU,RPS13,RPL18,NACA,RPLP0,RPL28,RPL26,RPL36,RPL27,RPS19,RPS28,RPS5,OPLAH,RPS10,EIF3L |
|------------|----------------------------|-----|---------|--------|--------|-----------------------------------------------------------------------------------------------------------------------------------------------------------------------------------------------------------------------------------------------------------------------------------------------------------------------------------------------------------------------------------------------------------------------------------------------------------------------------------------------------------------------------------------------------------------------------------------------------------------------------------------------------------------------------------------------------------------------------------------------------------------------------------------------------------------------------------------------------------------------------------------------------------------------------------------------------------------------------------------------------------------------------------------------------------------------------------------------------------------------------------------------------------------------------------------------------------------------------------------------------------------------------------------------------------------------------------------------------------------------------------------------------------------------------------------------------------------------------------------------------------------------------------------------------------------------------------------------------------------------------------------------------------------|-------------------------------------------------------------------------------------------------------------------------------------------------------------------------------------------------------------------------------------------------------------------------------------------------------------------------------------------------------------------------------------------------------------------------------------------------------------------------------------------------------------------------------------------------------------------------------------------------------------------------------------------------------------------------------------------------------------------------------------------------------------------------------------------------------------------------------------------------------------------------------------------------------------------------------------------------------------------------------------------------------------------------------------------------------------------------------------------------------------------------------------------|

T = 72 h, IFNa7: CoV-2 / mock

| #Term ID   | Term Description                         | Genes Mapped | Enrichment Score | Direction | False Discovery Rate | Method | Matching Proteins in Your Input (IDs)                                                                                                                                                                                                                                                                                                                                                                                                                                                                                                                                                                                                                                                                                                                                                                                                                                                                                                                                                                                                                                                                                                                                                                                                                                                                                                                                                                                                                                                                                                                                                                                                                                                                                                                                                                                                                                                                                                                                                  | Matching Proteins in Your Input (Labels)                                                                                                                                                                                                                                                                                                                                                                                                                                                                                                                                                                                                                                                                                                                                                                                                                                                                                                                                                                                                                                                                                            |  |  |  |  |
|------------|------------------------------------------|--------------|------------------|-----------|----------------------|--------|----------------------------------------------------------------------------------------------------------------------------------------------------------------------------------------------------------------------------------------------------------------------------------------------------------------------------------------------------------------------------------------------------------------------------------------------------------------------------------------------------------------------------------------------------------------------------------------------------------------------------------------------------------------------------------------------------------------------------------------------------------------------------------------------------------------------------------------------------------------------------------------------------------------------------------------------------------------------------------------------------------------------------------------------------------------------------------------------------------------------------------------------------------------------------------------------------------------------------------------------------------------------------------------------------------------------------------------------------------------------------------------------------------------------------------------------------------------------------------------------------------------------------------------------------------------------------------------------------------------------------------------------------------------------------------------------------------------------------------------------------------------------------------------------------------------------------------------------------------------------------------------------------------------------------------------------------------------------------------------|-------------------------------------------------------------------------------------------------------------------------------------------------------------------------------------------------------------------------------------------------------------------------------------------------------------------------------------------------------------------------------------------------------------------------------------------------------------------------------------------------------------------------------------------------------------------------------------------------------------------------------------------------------------------------------------------------------------------------------------------------------------------------------------------------------------------------------------------------------------------------------------------------------------------------------------------------------------------------------------------------------------------------------------------------------------------------------------------------------------------------------------|--|--|--|--|
| GO:0006956 | complement activation                    | 5            | 6.85201          | top       | 0.00016              | afc    | 9606.ENSP00000225698,9606.ENSP00000245907,9606.ENSP00000315130<br>9606.ENSP00000356399,9606.ENSP00000416561                                                                                                                                                                                                                                                                                                                                                                                                                                                                                                                                                                                                                                                                                                                                                                                                                                                                                                                                                                                                                                                                                                                                                                                                                                                                                                                                                                                                                                                                                                                                                                                                                                                                                                                                                                                                                                                                            | C1QBP,C3,CLU,CFH,CFB                                                                                                                                                                                                                                                                                                                                                                                                                                                                                                                                                                                                                                                                                                                                                                                                                                                                                                                                                                                                                                                                                                                |  |  |  |  |
| GO:0016266 | O-glycan processing                      | 7            | 5.98512          | top       | 0.00016              | afc    | 9606.ENSP00000287590,9606.ENSP00000321874,9606.ENSP00000360776<br>9606.ENSP00000381008,9606.ENSP00000417498,9606.ENSP00000436812<br>9606.ENSP00000484824                                                                                                                                                                                                                                                                                                                                                                                                                                                                                                                                                                                                                                                                                                                                                                                                                                                                                                                                                                                                                                                                                                                                                                                                                                                                                                                                                                                                                                                                                                                                                                                                                                                                                                                                                                                                                               | B3GNT7,B3GNT3,B4GALT5,MUC16,MUC4,MUC5B,MUC1                                                                                                                                                                                                                                                                                                                                                                                                                                                                                                                                                                                                                                                                                                                                                                                                                                                                                                                                                                                                                                                                                         |  |  |  |  |
| GO:0030449 | regulation of complement activation      | 7            | 5.56086          | top       | 0.00016              | afc    | 9606.ENSP00000225698,9606.ENSP00000245907,9606.ENSP00000315130<br>9606.ENSP00000356399,9606.ENSP00000379191,9606.ENSP00000416561<br>9606.ENSP00000479488                                                                                                                                                                                                                                                                                                                                                                                                                                                                                                                                                                                                                                                                                                                                                                                                                                                                                                                                                                                                                                                                                                                                                                                                                                                                                                                                                                                                                                                                                                                                                                                                                                                                                                                                                                                                                               | C1QBP,C3,CLU,CFH,CD59,CFB,PHB                                                                                                                                                                                                                                                                                                                                                                                                                                                                                                                                                                                                                                                                                                                                                                                                                                                                                                                                                                                                                                                                                                       |  |  |  |  |
| GO:2000257 | regulation of protein activation cascade | 7            | 5.56086          | top       | 0.00016              | afc    | 9606.ENSP00000225698,9606.ENSP00000245907,9606.ENSP00000315130<br>9606.ENSP00000356399,9606.ENSP00000379191,9606.ENSP00000416561<br>9606.ENSP00000479488                                                                                                                                                                                                                                                                                                                                                                                                                                                                                                                                                                                                                                                                                                                                                                                                                                                                                                                                                                                                                                                                                                                                                                                                                                                                                                                                                                                                                                                                                                                                                                                                                                                                                                                                                                                                                               | C1QBP,C3,CLU,CFH,CD59,CFB,PHB                                                                                                                                                                                                                                                                                                                                                                                                                                                                                                                                                                                                                                                                                                                                                                                                                                                                                                                                                                                                                                                                                                       |  |  |  |  |
| GO:0002920 | regulation of humoral immune response    | 8            | 4.9906           | top       | 0.00021              | afc    | 9606.ENSP00000225698,9606.ENSP00000245907,9606.ENSP00000315130<br>9606.ENSP00000356399,9606.ENSP00000379191,9606.ENSP00000391592<br>9606.ENSP00000416561,9606.ENSP00000479488                                                                                                                                                                                                                                                                                                                                                                                                                                                                                                                                                                                                                                                                                                                                                                                                                                                                                                                                                                                                                                                                                                                                                                                                                                                                                                                                                                                                                                                                                                                                                                                                                                                                                                                                                                                                          | C1QBP,C3,CLU,CFH,CD59,PTPN6,CFB,PHB                                                                                                                                                                                                                                                                                                                                                                                                                                                                                                                                                                                                                                                                                                                                                                                                                                                                                                                                                                                                                                                                                                 |  |  |  |  |
| GO:0006397 | mRNA processing                          | 160          | 0.395219         | bottom    | 0.00021              | ks     | 9606.ENSP00000215793,9606.ENSP00000215829,9606.ENSP00000216252<br>9606.ENSP00000216727,9606.ENSP00000217109,9606.ENSP00000221419<br>9606.ENSP00000225698,9606.ENSP00000225792,9606.ENSP00000227524<br>9606.ENSP00000228284,9606.ENSP00000229390,9606.ENSP00000238112<br>9606.ENSP00000240185,9606.ENSP00000242776,9606.ENSP00000243563<br>9606.ENSP00000244020,9606.ENSP00000246071,9606.ENSP00000246194<br>9606.ENSP00000249299,9606.ENSP00000253363,9606.ENSP00000254108<br>9606.ENSP00000254193,9606.ENSP00000254301,9606.ENSP00000258962<br>9606.ENSP00000261167,9606.ENSP00000261531,9606.ENSP00000261973<br>9606.ENSP00000262710,9606.ENSP00000263579,9606.ENSP00000263694<br>9606.ENSP00000265866,9606.ENSP00000265872,9606.ENSP00000266079<br>9606.ENSP00000266679,9606.ENSP00000269349,9606.ENSP00000276079<br>9606.ENSP00000282007,9606.ENSP00000283179,9606.ENSP00000291552<br>9606.ENSP00000293677,9606.ENSP00000297071,9606.ENSP00000300291<br>9606.ENSP00000300413,9606.ENSP00000301740,9606.ENSP00000302160<br>9606.ENSP00000304903,9606.ENSP00000305556,9606.ENSP00000305790<br>9606.ENSP00000307863,9606.ENSP00000310448,9606.ENSP00000310670<br>9606.ENSP00000310723,9606.ENSP00000311677,9606.ENSP00000313007<br>9606.ENSP00000313199,9606.ENSP00000313829,9606.ENSP00000316042<br>9606.ENSP00000317123,9606.ENSP00000318861,9606.ENSP00000319169<br>9606.ENSP00000319240,9606.ENSP00000324122,9606.ENSP00000325376<br>9606.ENSP00000325377,9606.ENSP00000325905,9606.ENSP00000326531<br>9606.ENSP00000326806,9606.ENSP00000328848,9606.ENSP00000335321<br>9606.ENSP00000336741,9606.ENSP00000336752,9606.ENSP00000337632<br>9606.ENSP00000340796,9606.ENSP00000341826,9606.ENSP00000342374<br>9606.ENSP00000343966,9606.ENSP00000346634,9606.ENSP00000346694<br>9606.ENSP00000347005,9606.ENSP00000348984,9606.ENSP00000349168<br>9606.ENSP00000349428,9606.ENSP00000349748,9606.ENSP00000352438<br>9606.ENSP00000355606,9606.ENSP00000355607,9606.ENSP00000355608 | SF3A1,SNRPD3,PHF5A,PABPN1,CSTF1,HNRNPL,C1QBP,DDX5,PRP<br>F19,SART3,SRSF9,CPSF3,TARDBP,DDX39A,SNRPA,SRSF6,SNRPB2,<br>RALY,LSM8,RBM39,FUS,SNRPA1,LGALS3,SRSF1,WBP11,SNW1,RB<br>M25,ACIN1,DCPS,SNRNP40,HNRNPH3,CCAR1,PRPF6,CPSF6,EIF4<br>A3,NONO,ZC3H13,HNRNPU,U2AFBP,RAVER1,TRA2A,NUDT21,SN<br>RPD1,SRRM2,LSM3,CD2BP2,PCBP1,SF3B3,U2AF2,SART1,CCAR2,<br>DDX23,PPP1R8,PABPC1,HNRNPD,KHDRBS1,HNRNPA0,SNRNP200<br>SF3B2,PRMT5,MAGOHB,PRPF31,HNRNPM,WDR33,SRSF7,THOC<br>6,NCBP2,RBM10,SF3B1,DHX15,FIP1L1,SARNP,ZNF326,HNRNPA1,<br>SNRPD2,PSPC1,THRAP3,HNRNPA2B1,CGI-<br>74,SON,HNRNPH1,PTBP1,SFPQ,PCBP2,CTNBL1,CDC73,DHX9,RN<br>ASEL,ADAR,SYNCRIP,RBM15,AHCYL1,FMR1,RBMX,SRSF11,CDC5L<br>,YBX1,HNRNPH2,CSTF2,SF3A3,SRSF3,PRPF4,HNRNPR,NCBP1,LSM<br>2,HNRNPK,XRN2,SF1,POLR2B,DDX1,RNMT,HNRNPU1,SRSF2,HN<br>RNPA3,GT2F1,DDX39B,DDX17,SMU1,KHSRP,NHP2L1,ELAVL1,PR<br>PF40A,RBM4,HNRNPLL,EFTUD2,STRAP,POLDIP3,HNRNPF,SNRPE,<br>PNPT1,ESRP1,SNRPB,PTBP3,DDX46,TRA2B,U2SURP,SRSF10,ALYR<br>EF,PLRG1,LUC7L3,HSPA8,CLNS1A,PUF60,CELF1,CHERP,HTATSF1,<br>HNRNPC,SRSF5,NOL3,RNPS1,PRPF8,RBM8A,DDX42,LSM4,SUPT5<br>H,SNRNP70,POLR2A,SRRT,SAP18,CPSF1 |  |  |  |  |

|            |                                                 |     |          |        |         |     |                                                                                                                                                                                                                                                                                                                                                                                                                                                                                                                                                                                                                                                                                                                                                                                                                                                                                                                                                                                                                                                                                                                                                                                                                                                                                                                                                                                                                                                                                                                                                                                                                                                                                                                                                                                                                                                                                                                                                                                                                                                                                                                                                                                     |                                                                                                                                                                                                                                                                                                                                                                                                                                                                                                                                                                                                                                                                                                                                                                                                                                                                                                                                                                                                                                                                                                                                                                                                                                                                                                                                                                                                                                                                                                                                                                  |  |  |  |
|------------|-------------------------------------------------|-----|----------|--------|---------|-----|-------------------------------------------------------------------------------------------------------------------------------------------------------------------------------------------------------------------------------------------------------------------------------------------------------------------------------------------------------------------------------------------------------------------------------------------------------------------------------------------------------------------------------------------------------------------------------------------------------------------------------------------------------------------------------------------------------------------------------------------------------------------------------------------------------------------------------------------------------------------------------------------------------------------------------------------------------------------------------------------------------------------------------------------------------------------------------------------------------------------------------------------------------------------------------------------------------------------------------------------------------------------------------------------------------------------------------------------------------------------------------------------------------------------------------------------------------------------------------------------------------------------------------------------------------------------------------------------------------------------------------------------------------------------------------------------------------------------------------------------------------------------------------------------------------------------------------------------------------------------------------------------------------------------------------------------------------------------------------------------------------------------------------------------------------------------------------------------------------------------------------------------------------------------------------------|------------------------------------------------------------------------------------------------------------------------------------------------------------------------------------------------------------------------------------------------------------------------------------------------------------------------------------------------------------------------------------------------------------------------------------------------------------------------------------------------------------------------------------------------------------------------------------------------------------------------------------------------------------------------------------------------------------------------------------------------------------------------------------------------------------------------------------------------------------------------------------------------------------------------------------------------------------------------------------------------------------------------------------------------------------------------------------------------------------------------------------------------------------------------------------------------------------------------------------------------------------------------------------------------------------------------------------------------------------------------------------------------------------------------------------------------------------------------------------------------------------------------------------------------------------------|--|--|--|
| GO:000375  | RNA splicing, via transesterification reactions | 128 | 0.402529 | bottom | 0.00022 | ks  | <p>9606. ENSP00000215793, 9606. ENSP00000215829, 9606. ENSP00000216252</p> <p>9606. ENSP00000216727, 9606. ENSP00000217109, 9606. ENSP00000221419</p> <p>9606. ENSP00000225792, 9606. ENSP00000227524, 9606. ENSP00000228284</p> <p>9606. ENSP00000229390, 9606. ENSP00000238112, 9606. ENSP00000242776</p> <p>9606. ENSP00000243563, 9606. ENSP00000244020, 9606. ENSP00000246071</p> <p>9606. ENSP00000246194, 9606. ENSP00000249299, 9606. ENSP00000254108</p> <p>9606. ENSP00000254193, 9606. ENSP00000258962, 9606. ENSP00000261167</p> <p>9606. ENSP00000261531, 9606. ENSP00000263579, 9606. ENSP00000263694</p> <p>9606. ENSP00000265866, 9606. ENSP00000265872, 9606. ENSP00000266079</p> <p>9606. ENSP00000269349, 9606. ENSP00000276079, 9606. ENSP00000283179</p> <p>9606. ENSP00000291552, 9606. ENSP00000293677, 9606. ENSP00000297071</p> <p>9606. ENSP00000300291, 9606. ENSP00000300413, 9606. ENSP00000301740</p> <p>9606. ENSP00000302160, 9606. ENSP00000304903, 9606. ENSP00000305556</p> <p>9606. ENSP00000305790, 9606. ENSP00000307863, 9606. ENSP00000310448</p> <p>9606. ENSP00000310723, 9606. ENSP00000313007, 9606. ENSP00000313199</p> <p>9606. ENSP00000316042, 9606. ENSP00000317123, 9606. ENSP00000318861</p> <p>9606. ENSP00000319169, 9606. ENSP00000319240, 9606. ENSP00000324122</p> <p>9606. ENSP00000325376, 9606. ENSP00000325377, 9606. ENSP00000325905</p> <p>9606. ENSP00000326806, 9606. ENSP00000335321, 9606. ENSP00000336741</p> <p>9606. ENSP00000336752, 9606. ENSP00000341826, 9606. ENSP00000342374</p> <p>9606. ENSP00000343966, 9606. ENSP00000346694, 9606. ENSP00000347005</p> <p>9606. ENSP00000349168, 9606. ENSP00000349428, 9606. ENSP00000349748</p> <p>9606. ENSP00000352438, 9606. ENSP00000355050, 9606. ENSP00000356520</p> <p>9606. ENSP00000358635, 9606. ENSP00000358799, 9606. ENSP00000359645</p> <p>9606. ENSP00000359988, 9606. ENSP00000360532, 9606. ENSP00000361626</p> <p>9606. ENSP00000361927, 9606. ENSP00000362063, 9606. ENSP00000362110</p> <p>9606. ENSP00000362820, 9606. ENSP00000363313, 9606. ENSP00000363745</p> <p>9606. ENSP00000364289, 9606. ENSP00000364813, 9606. ENSP00000365439</p> | <p>SF3A1, SNRPD3, PHF5A, PABPN1, CSTF1, HNRNPL, DDX5, PRPF19, SA</p> <p>RT3, SRSF9, CPSF3, DDX39A, SNRPA, SRSF6, SNRPB2, RALY, LSM8, FUS</p> <p>, SNRPA1, SRSF1, WBP11, SNW1, DCPS, SNRNP40, HNRNPH3, CCAR1,</p> <p>PRPF6, EIF4A3, NONO, HNRNPU, U2AFBP, RAVER1, TRA2A, NUDT21,</p> <p>SNRPD1, SRRM2, LSM3, CD2BP2, PCBP1, SF3B3, U2AF2, SART1, DDX2</p> <p>3, PABPC1, HNRNPD, HNRNPA0, SNRNP200, SF3B2, PRMT5, MAGOH</p> <p>B, PRPF31, HNRNPM, WDR33, SRSF7, NCBP2, SF3B1, DHX15, FIP1L1,</p> <p>HNRNPA1, SNRPD2, PSPC1, HNRNPA2B1, CGI-</p> <p>74, HNRNPH1, PTBP1, SFPQ, PCBP2, CTNBNB1, DHX9, SYNCRIP, RBM1</p> <p>5, RBMX, SRSF11, CDC5L, YBX1, HNRNPH2, CSTF2, SF3A3, SRSF3, PRPF</p> <p>4, HNRNPR, NCBP1, LSM2, HNRNPK, SF1, POLR2B, DDX1, HNRNPL1,</p> <p>SRSF2, HNRNPA3, GTF2F1, DDX39B, DDX17, SMU1, KHSRP, NHP2L1,</p> <p>ELAVL1, PRPF40A, EFTUD2, STRAP, HNRNPF, SNRPE, SNRPB, DDX46,</p> <p>TRA2B, U2SURP, SRSF10, ALYREF, PLRG1, LUC7L3, HSPA8, CLN1S1A, P</p> <p>UF60, CELF1, CHERP, HTATSF1, HNRNPC, SRSF5, NOL3, RNPS1, PRPF8</p> <p>, RBM8A, DDX42, LSM4, SNRNP70, POLR2A, SRR1, CPSF1</p>                                                                                                                                                                                                                                                                                                                                                                                                                                                      |  |  |  |
| GO:0002673 | regulation of acute inflammatory response       | 9   | 4.55841  | top    | 0.00022 | afc | <p>9606. ENSP00000225698, 9606. ENSP00000245907, 9606. ENSP00000315130</p> <p>9606. ENSP00000356399, 9606. ENSP00000379191, 9606. ENSP00000381607</p> <p>9606. ENSP00000416561, 9606. ENSP00000418770, 9606. ENSP00000479488</p>                                                                                                                                                                                                                                                                                                                                                                                                                                                                                                                                                                                                                                                                                                                                                                                                                                                                                                                                                                                                                                                                                                                                                                                                                                                                                                                                                                                                                                                                                                                                                                                                                                                                                                                                                                                                                                                                                                                                                    | <p>C1QBP, C3, CLU, CFH, CD59, GSTP1, CFB, PARK7, PHB</p>                                                                                                                                                                                                                                                                                                                                                                                                                                                                                                                                                                                                                                                                                                                                                                                                                                                                                                                                                                                                                                                                                                                                                                                                                                                                                                                                                                                                                                                                                                         |  |  |  |
| GO:0043604 | amide biosynthetic process                      | 197 | 0.392157 | bottom | 0.00022 | ks  | <p>9606. ENSP00000175506, 9606. ENSP00000177742, 9606. ENSP00000199706</p> <p>9606. ENSP00000205402, 9606. ENSP00000215567, 9606. ENSP00000215882</p> <p>9606. ENSP00000216190, 9606. ENSP00000216554, 9606. ENSP00000216605</p> <p>9606. ENSP00000216951, 9606. ENSP00000220849, 9606. ENSP00000222247</p> <p>9606. ENSP00000223029, 9606. ENSP00000225430, 9606. ENSP00000229416</p> <p>9606. ENSP00000230050, 9606. ENSP00000231572, 9606. ENSP00000233057</p> <p>9606. ENSP00000234677, 9606. ENSP00000236959, 9606. ENSP00000248342</p> <p>9606. ENSP00000251453, 9606. ENSP00000253039, 9606. ENSP00000253099</p> <p>9606. ENSP00000253108, 9606. ENSP00000253382, 9606. ENSP00000253792</p> <p>9606. ENSP00000254630, 9606. ENSP00000256383, 9606. ENSP00000256854</p> <p>9606. ENSP00000259469, 9606. ENSP00000261772, 9606. ENSP00000261868</p> <p>9606. ENSP00000262027, 9606. ENSP00000262584, 9606. ENSP00000264161</p> <p>9606. ENSP00000264705, 9606. ENSP00000265753, 9606. ENSP00000265838</p> <p>9606. ENSP00000266126, 9606. ENSP00000270625, 9606. ENSP00000272317</p> <p>9606. ENSP00000274606, 9606. ENSP00000275428, 9606. ENSP00000278572</p> <p>9606. ENSP00000280346, 9606. ENSP00000280557, 9606. ENSP00000281828</p> <p>9606. ENSP00000288937, 9606. ENSP00000289371, 9606. ENSP00000293831</p> <p>9606. ENSP00000296424, 9606. ENSP00000296456, 9606. ENSP00000296577</p> <p>9606. ENSP00000296674, 9606. ENSP00000296805, 9606. ENSP00000300648</p> <p>9606. ENSP00000301457, 9606. ENSP00000302896, 9606. ENSP00000304592</p> <p>9606. ENSP00000306548, 9606. ENSP00000307188, 9606. ENSP00000307241</p> <p>9606. ENSP00000307567, 9606. ENSP00000307889, 9606. ENSP00000307940</p> <p>9606. ENSP00000308275, 9606. ENSP00000309334, 9606. ENSP00000309830</p> <p>9606. ENSP00000311430, 9606. ENSP00000312311, 9606. ENSP00000313007</p> <p>9606. ENSP00000314508, 9606. ENSP00000318646, 9606. ENSP00000320309</p> <p>9606. ENSP00000322419, 9606. ENSP00000322439, 9606. ENSP00000325448</p> <p>9606. ENSP00000325548, 9606. ENSP00000326381, 9606. ENSP00000331901</p> <p>9606. ENSP00000332604, 9606. ENSP00000336702, 9606. ENSP00000336721</p> | <p>ASNS, MRPS34, MRPL28, DLD, TECR, SLC25A1, EIF3D, EIF5, MTHFD1,</p> <p>GSS, EIF3E, RPL18A, AIMP2, RPL19, GCLC, RPS12, RARS, EIF2AK2, SAR</p> <p>S, ATIC, EIF3K, RPS16, EIF2S3, MRPL4, EIF3G, ACSS2, ACLY, PTC3D, EIF2</p> <p>S1, NARS, RPL35, AARS, EIF3J, MARS, RPL8, DARS, CAD, EIF4H, ACAT1,</p> <p>EIF2B2, RPS11, RPS27A, NHP2, GGCT, RPS3, DLAT, DENR, FAR5B, MRP</p> <p>L17, EIF5B, EIF4A1, BDH2, APEH, ABCE1, RPS23, GFM2, GCN1L1, NDU</p> <p>FA7, RPS9, FASN, MRPL13, ASL, PDHB, QARS, RPL13, EEF2, MRPL38, R</p> <p>PL15, RPL38, RPL4, MRPL46, PABPC1, GBA, RPS15A, FARSA, RPL2, TU</p> <p>FM, KARS, CNBP2, EIF4A2, EEF1G, EIF3C, EIF5A, LARP1, EEF1A1, RPS7,</p> <p>RPL7, RPS2, PPA2, RPS21, RPL3, RPL27A, RPL21, RPL1, RPS17, RPS3A,</p> <p>RPSA, RPL22, WARS, RPS26, COPS5, EIF2B3, ETF1, EIF3B, RPL12, RPL3</p> <p>9, IARS2, EPRS, RPS27, EIF3A, GCLM, RPL5, MCTS1, MRPS2, RPL7A, MR</p> <p>PL14, MRPS18A, ASS1, PABPC4, PPA1, YARS, EIF3I, RPS4X, RPL10A, EIF</p> <p>6, RPL11, EIF2S2, IARS, VARS, RRB1, EEF1E1, PDHA1, RPS6, CARS, GA</p> <p>RT, GARS, RPL13A, EEF1B2, RPL24, LARS, RPL34, AIMP1, RPL14, RPS8,</p> <p>RPL23L, HAGH, LARP4, DDX3X, RPS14, RPL31, RBM4, TARS, EIF4B, RPL</p> <p>23A, RPS18, EIF2B4, RPL17, GSPT1, RPL9, AARS1, RPL6, MRPL55, EEF</p> <p>1D, RPL10, RPS24, EIF4G1, RPL32, EIF2A, RPL29, RPL35A, EIF1, RPL23,</p> <p>ACSL1, EIF4E, HARS, GNB2L1, RPL30, RPS20, EIF3F, EIF4G2, RPS25, FA</p> <p>U, RPS13, EIF3M, RPL18, NACA, RPLP0, RPL28, RPL26, RPL36, RPL27, R</p> <p>PS19, RPS28, RPS5, OPLAH, RPS10, EIF3L</p> |  |  |  |
| GO:0072376 | protein activation cascade                      | 6   | 5.913    | top    | 0.00022 | afc | <p>9606. ENSP00000225698, 9606. ENSP00000245907, 9606. ENSP00000315130</p> <p>9606. ENSP00000356399, 9606. ENSP00000377055, 9606. ENSP00000416561</p>                                                                                                                                                                                                                                                                                                                                                                                                                                                                                                                                                                                                                                                                                                                                                                                                                                                                                                                                                                                                                                                                                                                                                                                                                                                                                                                                                                                                                                                                                                                                                                                                                                                                                                                                                                                                                                                                                                                                                                                                                               | <p>C1QBP, C3, CLU, CFH, PRCP, CFB</p>                                                                                                                                                                                                                                                                                                                                                                                                                                                                                                                                                                                                                                                                                                                                                                                                                                                                                                                                                                                                                                                                                                                                                                                                                                                                                                                                                                                                                                                                                                                            |  |  |  |

|            |                                |     |          |        |         |     |                                                                                                                                                                                                                                                                                                                                                                                                                                                                                                                                                                                                                                                                                                                                                                                                                                                                                                                                                                                                                                                                                                                                                                                                                                                                                                                                                                                                                                                                                                                                                                                                                                                                                                                                                                                                                                                                                                                                                                                                                                                                                                                                                                                     |                                                                                                                                                                                                                                                                                                                                                                                                                                                                                                                                                                                                                                                                                                                                                                                                                                                                                                                                                                                                                                                                                                                                                                           |  |  |  |
|------------|--------------------------------|-----|----------|--------|---------|-----|-------------------------------------------------------------------------------------------------------------------------------------------------------------------------------------------------------------------------------------------------------------------------------------------------------------------------------------------------------------------------------------------------------------------------------------------------------------------------------------------------------------------------------------------------------------------------------------------------------------------------------------------------------------------------------------------------------------------------------------------------------------------------------------------------------------------------------------------------------------------------------------------------------------------------------------------------------------------------------------------------------------------------------------------------------------------------------------------------------------------------------------------------------------------------------------------------------------------------------------------------------------------------------------------------------------------------------------------------------------------------------------------------------------------------------------------------------------------------------------------------------------------------------------------------------------------------------------------------------------------------------------------------------------------------------------------------------------------------------------------------------------------------------------------------------------------------------------------------------------------------------------------------------------------------------------------------------------------------------------------------------------------------------------------------------------------------------------------------------------------------------------------------------------------------------------|---------------------------------------------------------------------------------------------------------------------------------------------------------------------------------------------------------------------------------------------------------------------------------------------------------------------------------------------------------------------------------------------------------------------------------------------------------------------------------------------------------------------------------------------------------------------------------------------------------------------------------------------------------------------------------------------------------------------------------------------------------------------------------------------------------------------------------------------------------------------------------------------------------------------------------------------------------------------------------------------------------------------------------------------------------------------------------------------------------------------------------------------------------------------------|--|--|--|
| GO:0000398 | mRNA splicing, via spliceosome | 127 | 0.399947 | bottom | 0.00029 | ks  | <p>9606. ENSP00000215793, 9606. ENSP00000215829, 9606. ENSP00000216252</p> <p>9606. ENSP00000216727, 9606. ENSP00000217109, 9606. ENSP00000221419</p> <p>9606. ENSP00000225792, 9606. ENSP00000227524, 9606. ENSP00000228284</p> <p>9606. ENSP00000229390, 9606. ENSP00000238112, 9606. ENSP00000242776</p> <p>9606. ENSP00000243563, 9606. ENSP00000244020, 9606. ENSP00000246071</p> <p>9606. ENSP00000246194, 9606. ENSP00000249299, 9606. ENSP00000254108</p> <p>9606. ENSP00000254193, 9606. ENSP00000258962, 9606. ENSP00000261167</p> <p>9606. ENSP00000261531, 9606. ENSP00000263579, 9606. ENSP00000263694</p> <p>9606. ENSP00000265866, 9606. ENSP00000265872, 9606. ENSP00000266079</p> <p>9606. ENSP00000269349, 9606. ENSP00000276079, 9606. ENSP00000283179</p> <p>9606. ENSP00000291552, 9606. ENSP00000293677, 9606. ENSP00000297071</p> <p>9606. ENSP00000300291, 9606. ENSP00000300413, 9606. ENSP00000301740</p> <p>9606. ENSP00000302160, 9606. ENSP00000304903, 9606. ENSP00000305556</p> <p>9606. ENSP00000305790, 9606. ENSP00000307863, 9606. ENSP00000310448</p> <p>9606. ENSP00000310723, 9606. ENSP00000313007, 9606. ENSP00000313199</p> <p>9606. ENSP00000316042, 9606. ENSP00000317123, 9606. ENSP00000318861</p> <p>9606. ENSP00000319169, 9606. ENSP00000319240, 9606. ENSP00000324122</p> <p>9606. ENSP00000325376, 9606. ENSP00000325377, 9606. ENSP00000325905</p> <p>9606. ENSP00000326806, 9606. ENSP00000335321, 9606. ENSP00000336741</p> <p>9606. ENSP00000336752, 9606. ENSP00000341826, 9606. ENSP00000342374</p> <p>9606. ENSP00000343966, 9606. ENSP00000346694, 9606. ENSP00000347005</p> <p>9606. ENSP00000349168, 9606. ENSP00000349428, 9606. ENSP00000349748</p> <p>9606. ENSP00000352438, 9606. ENSP00000355050, 9606. ENSP00000356520</p> <p>9606. ENSP00000358635, 9606. ENSP00000358799, 9606. ENSP00000359645</p> <p>9606. ENSP00000359988, 9606. ENSP00000360532, 9606. ENSP00000361626</p> <p>9606. ENSP00000361927, 9606. ENSP00000362063, 9606. ENSP00000362110</p> <p>9606. ENSP00000362820, 9606. ENSP00000363313, 9606. ENSP00000363745</p> <p>9606. ENSP00000364289, 9606. ENSP00000364813, 9606. ENSP00000365439</p> | <p>SF3A1, SNRPD3, PHF5A, PABPN1, CSTF1, HNRNPL, DDX5, PRPF19, SART3, SRSF9, CPSF3, DDX39A, SNRPA, SRSF6, SNRPB2, RALY, LSM8, FUS, SNRPA1, SRSF1, WBP11, SNW1, DCPS, SNRNP40, HNRNPH3, CCAR1, PRPF6, EIF4A3, NONO, HNRNPU, U2AFBP, RAVER1, TRA2A, NUDT21, SNRPD1, SRRM2, LSM3, CD2BP2, PCBP1, SF3B3, U2AF2, SART1, DDX23, PABPC1, HNRNPD, HNRNPA0, SNRNP200, SF3B2, PRMT5, MAGOHB, PRPF31, HNRNPM, WDR33, SRSF7, NCBP2, SF3B1, DHX15, FIP1L1, HNRNPA1, SNRPD2, PSPC1, HNRNPA2B1, CGI-74, HNRNPH1, PTBP1, SFPQ, PCBP2, CTNBNB1, DHX9, SYNCRIP, RBM15, RBMX, SRSF11, CDC5L, YBX1, HNRNPH2, CSTF2, SF3A3, SRSF3, PRPF4, HNRNPR, NCBP1, LSM2, HNRNPK, SF1, POLR2B, DDX1, HNRNPL1, SRSF2, HNRNPA3, GTF2F1, DDX39B, DDX17, SMU1, NHP2L1, ELAVL1, PRPF40A, EFTUD2, STRAP, HNRNPF, SNRPE, SNRPB, DDX46, TRA2B, U2SURP, SRSF10, ALYREF, PLRG1, LUC7L3, HSPA8, CLNS1A, PUF60, CELF1, CHERP, HTATS1, HNRNPC, SRSF5, NOL3, RNPS1, PRPF8, RBM8A, DDX42, LSM4, SNRNP70, POLR2A, SRRT, CPSF1</p>                                                                                                                                                                                          |  |  |  |
| GO:0008380 | RNA splicing                   | 152 | 0.368846 | bottom | 0.00032 | ks  | <p>9606. ENSP00000215793, 9606. ENSP00000215829, 9606. ENSP00000216038</p> <p>9606. ENSP00000216252, 9606. ENSP00000216727, 9606. ENSP00000217109</p> <p>9606. ENSP00000221419, 9606. ENSP00000225698, 9606. ENSP00000225792</p> <p>9606. ENSP00000227524, 9606. ENSP00000228284, 9606. ENSP00000229390</p> <p>9606. ENSP00000238112, 9606. ENSP00000240185, 9606. ENSP00000242776</p> <p>9606. ENSP00000243563, 9606. ENSP00000244020, 9606. ENSP00000246071</p> <p>9606. ENSP00000246194, 9606. ENSP00000249299, 9606. ENSP00000253363</p> <p>9606. ENSP00000254108, 9606. ENSP00000254193, 9606. ENSP00000254301</p> <p>9606. ENSP00000258962, 9606. ENSP00000261167, 9606. ENSP00000261531</p> <p>9606. ENSP00000261700, 9606. ENSP00000261973, 9606. ENSP00000262710</p> <p>9606. ENSP00000263579, 9606. ENSP00000263694, 9606. ENSP00000265866</p> <p>9606. ENSP00000265872, 9606. ENSP00000266079, 9606. ENSP00000269349</p> <p>9606. ENSP00000276079, 9606. ENSP00000282007, 9606. ENSP00000283179</p> <p>9606. ENSP00000291552, 9606. ENSP00000293677, 9606. ENSP00000297071</p> <p>9606. ENSP00000300291, 9606. ENSP00000300413, 9606. ENSP00000301740</p> <p>9606. ENSP00000302160, 9606. ENSP00000304903, 9606. ENSP00000305556</p> <p>9606. ENSP00000305790, 9606. ENSP00000306117, 9606. ENSP00000307863</p> <p>9606. ENSP00000310448, 9606. ENSP00000310670, 9606. ENSP00000310723</p> <p>9606. ENSP00000311677, 9606. ENSP00000313007, 9606. ENSP00000313199</p> <p>9606. ENSP00000316042, 9606. ENSP00000317123, 9606. ENSP00000318861</p> <p>9606. ENSP00000319169, 9606. ENSP00000319240, 9606. ENSP00000324122</p> <p>9606. ENSP00000324804, 9606. ENSP00000325376, 9606. ENSP00000325377</p> <p>9606. ENSP00000325905, 9606. ENSP00000326531, 9606. ENSP00000326806</p> <p>9606. ENSP00000328848, 9606. ENSP00000335321, 9606. ENSP00000336741</p> <p>9606. ENSP00000336752, 9606. ENSP00000340796, 9606. ENSP00000341826</p> <p>9606. ENSP00000342374, 9606. ENSP00000343966, 9606. ENSP00000346634</p> <p>9606. ENSP00000346694, 9606. ENSP00000347005, 9606. ENSP00000348984</p> <p>9606. ENSP00000349168, 9606. ENSP00000349428, 9606. ENSP00000349748</p> | <p>SF3A1, SNRPD3, RTCB, PHF5A, PABPN1, CSTF1, HNRNPL, C1QBP, DDX5, PRPF19, SART3, SRSF9, CPSF3, TARDBP, DDX39A, SNRPA, SRSF6, SNRPB2, RALY, LSM8, RBM39, FUS, SNRPA1, LGALS3, SRSF1, WBP11, SNW1, C14orf166, RBM25, ACIN1, DCPS, SNRNP40, HNRNPH3, CCAR1, PRPF6, EIF4A3, NONO, ZC3H13, HNRNPU, U2AFBP, RAVER1, TRA2A, NUDT21, SNRPD1, SRRM2, LSM3, CD2BP2, PCBP1, SF3B3, DDX19A, U2AF2, SART1, CCAR2, DDX23, PPP1R8, PABPC1, HNRNPD, HNRNPA0, SNRNP200, SF3B2, PRMT5, MAGOHB, PRPF31, PPP2R1A, HNRNPM, WDR33, SRSF7, THOC6, NCBP2, RBM10, SF3B1, DHX15, FIP1L1, ZNF326, HNRNPA1, SNRPD2, PSPC1, THRAP3, HNRNPA2B1, CGI-74, SON, HNRNPH1, PTBP1, SFPQ, PCBP2, CTNBNB1, DHX9, SYNCRIP, RBM15, FMR1, RBMX, SRSF11, CDC5L, YBX1, HNRNPH2, CSTF2, SF3A3, SRSF3, PRPF4, HNRNPR, NCBP1, LSM2, HNRNPK, SF1, POLR2B, DDX1, HNRNPL1, SRSF2, HNRNPA3, GTF2F1, DDX39B, DDX17, SMU1, KH SRP, NHP2L1, ELAVL1, PRPF40A, RBM4, EFTUD2, STRAP, HNRNPF, SNRPE, ESRP1, SNRPB, PTBP3, DDX46, TRA2B, PPP2CA, U2SURP, SRSF10, ALYREF, PLRG1, LUC7L3, HSPA8, CLNS1A, PUF60, CELF1, CHERP, HTATS1, HNRNPC, SRSF5, NOL3, RNPS1, PRPF8, RBM8A, DDX42, LSM4, SNRNP70, POLR2A, SRRT, SAP18, CPSF1</p> |  |  |  |
| GO:0006493 | protein O-linked glycosylation | 10  | 4.11632  | top    | 0.0004  | afc | <p>9606. ENSP00000287590, 9606. ENSP00000321874, 9606. ENSP00000360776</p> <p>9606. ENSP00000362824, 9606. ENSP00000373206, 9606. ENSP00000381008</p> <p>9606. ENSP00000417498, 9606. ENSP00000425809, 9606. ENSP00000436812</p> <p>9606. ENSP00000484824</p>                                                                                                                                                                                                                                                                                                                                                                                                                                                                                                                                                                                                                                                                                                                                                                                                                                                                                                                                                                                                                                                                                                                                                                                                                                                                                                                                                                                                                                                                                                                                                                                                                                                                                                                                                                                                                                                                                                                       | <p>B3GNT7, B3GNT3, B4GALT5, OGT, EOGT, MUC16, MUC4, PGM3, MUC5B, MUC1</p>                                                                                                                                                                                                                                                                                                                                                                                                                                                                                                                                                                                                                                                                                                                                                                                                                                                                                                                                                                                                                                                                                                 |  |  |  |

|            |                                            |     |          |        |         |     |                                                                                                                                                                                                                                                                                                                                                                                                                                                                                                                                                                                                                                                                                                                                                                                                                                                                                                                                                                                                                                                                                                                                                                                                                                                                                                                                                                                                                                                                                                                                                                                                                                                                                                                                                                                                                                                                                                                                                                                                                                                                                                                                                                                                                                                                                                                                                                                                                                                                                                                                                                                                                                                                                                                                                                                                                                                                                                                                                                                                                                                                                                                                                                                                                                                                                                                                                                                                                                                                                                                                   |  |  |  |
|------------|--------------------------------------------|-----|----------|--------|---------|-----|-----------------------------------------------------------------------------------------------------------------------------------------------------------------------------------------------------------------------------------------------------------------------------------------------------------------------------------------------------------------------------------------------------------------------------------------------------------------------------------------------------------------------------------------------------------------------------------------------------------------------------------------------------------------------------------------------------------------------------------------------------------------------------------------------------------------------------------------------------------------------------------------------------------------------------------------------------------------------------------------------------------------------------------------------------------------------------------------------------------------------------------------------------------------------------------------------------------------------------------------------------------------------------------------------------------------------------------------------------------------------------------------------------------------------------------------------------------------------------------------------------------------------------------------------------------------------------------------------------------------------------------------------------------------------------------------------------------------------------------------------------------------------------------------------------------------------------------------------------------------------------------------------------------------------------------------------------------------------------------------------------------------------------------------------------------------------------------------------------------------------------------------------------------------------------------------------------------------------------------------------------------------------------------------------------------------------------------------------------------------------------------------------------------------------------------------------------------------------------------------------------------------------------------------------------------------------------------------------------------------------------------------------------------------------------------------------------------------------------------------------------------------------------------------------------------------------------------------------------------------------------------------------------------------------------------------------------------------------------------------------------------------------------------------------------------------------------------------------------------------------------------------------------------------------------------------------------------------------------------------------------------------------------------------------------------------------------------------------------------------------------------------------------------------------------------------------------------------------------------------------------------------------------------|--|--|--|
| GO:0043043 | peptide biosynthetic process               | 178 | 0.392472 | bottom | 0.0006  | ks  | <p>9606. ENSP00000177742, 9606. ENSP00000199706, 9606. ENSP00000216190</p> <p>9606. ENSP00000216554, 9606. ENSP00000216951, 9606. ENSP00000220849</p> <p>9606. ENSP00000222247, 9606. ENSP00000223029, 9606. ENSP00000225430</p> <p>9606. ENSP00000229416, 9606. ENSP00000230050, 9606. ENSP00000231572</p> <p>9606. ENSP00000233057, 9606. ENSP00000234677, 9606. ENSP00000248342</p> <p>9606. ENSP00000251453, 9606. ENSP00000253039, 9606. ENSP00000253099</p> <p>9606. ENSP00000253108, 9606. ENSP00000254630, 9606. ENSP00000256383</p> <p>9606. ENSP00000256854, 9606. ENSP00000259469, 9606. ENSP00000261772</p> <p>9606. ENSP00000261868, 9606. ENSP00000262027, 9606. ENSP00000262584</p> <p>9606. ENSP00000264161, 9606. ENSP00000265753, 9606. ENSP00000266126</p> <p>9606. ENSP00000270625, 9606. ENSP00000272317, 9606. ENSP00000274606</p> <p>9606. ENSP00000275428, 9606. ENSP00000278572, 9606. ENSP00000280557</p> <p>9606. ENSP00000281828, 9606. ENSP00000288937, 9606. ENSP00000289371</p> <p>9606. ENSP00000293831, 9606. ENSP00000296424, 9606. ENSP00000296456</p> <p>9606. ENSP00000296577, 9606. ENSP00000296674, 9606. ENSP00000296805</p> <p>9606. ENSP00000300648, 9606. ENSP00000301457, 9606. ENSP00000302896</p> <p>9606. ENSP00000306548, 9606. ENSP00000307567, 9606. ENSP00000307889</p> <p>9606. ENSP00000307940, 9606. ENSP00000308275, 9606. ENSP00000309334</p> <p>9606. ENSP00000309830, 9606. ENSP00000311430, 9606. ENSP00000312311</p> <p>9606. ENSP00000313007, 9606. ENSP00000318646, 9606. ENSP00000320309</p> <p>9606. ENSP00000322419, 9606. ENSP00000322439, 9606. ENSP00000325448</p> <p>9606. ENSP00000325548, 9606. ENSP00000326381, 9606. ENSP00000331901</p> <p>9606. ENSP00000332604, 9606. ENSP00000336702, 9606. ENSP00000336721</p> <p>9606. ENSP00000339063, 9606. ENSP00000339095, 9606. ENSP00000339795</p> <p>9606. ENSP00000341885, 9606. ENSP00000343885, 9606. ENSP00000345957</p> <p>9606. ENSP00000346001, 9606. ENSP00000346015, 9606. ENSP00000346027</p> <p>9606. ENSP00000346037, 9606. ENSP00000346046, 9606. ENSP00000346050</p> <p>9606. ENSP00000346067, 9606. ENSP00000346088, 9606. ENSP00000347495</p> <p>9606. ENSP00000245907, 9606. ENSP00000356399, 9606. ENSP00000416561</p>                                                                                                                                                                                                                                                                                                                                                                                                                                                                                                                                                                                                                                                                                                                                                                                                                                                                                                                                                                                                                                                                                                                                                                                                                                                                    |  |  |  |
| GO:0006957 | complement activation, alternative pathway | 3   | 8.45774  | top    | 0.00065 | afc | <p>9606. ENSP00000245907, 9606. ENSP00000356399, 9606. ENSP00000416561</p> <p>C3, CFH, CFB</p>                                                                                                                                                                                                                                                                                                                                                                                                                                                                                                                                                                                                                                                                                                                                                                                                                                                                                                                                                                                                                                                                                                                                                                                                                                                                                                                                                                                                                                                                                                                                                                                                                                                                                                                                                                                                                                                                                                                                                                                                                                                                                                                                                                                                                                                                                                                                                                                                                                                                                                                                                                                                                                                                                                                                                                                                                                                                                                                                                                                                                                                                                                                                                                                                                                                                                                                                                                                                                                    |  |  |  |
| GO:0006412 | translation                                | 170 | 0.409808 | bottom | 0.0011  | ks  | <p>9606. ENSP00000177742, 9606. ENSP00000199706, 9606. ENSP00000216190</p> <p>9606. ENSP00000216554, 9606. ENSP00000220849, 9606. ENSP00000222247</p> <p>9606. ENSP00000223029, 9606. ENSP00000225430, 9606. ENSP00000230050</p> <p>9606. ENSP00000231572, 9606. ENSP00000233057, 9606. ENSP00000234677</p> <p>9606. ENSP00000248342, 9606. ENSP00000251453, 9606. ENSP00000253039</p> <p>9606. ENSP00000253099, 9606. ENSP00000253108, 9606. ENSP00000254630</p> <p>9606. ENSP00000256383, 9606. ENSP00000256854, 9606. ENSP00000259469</p> <p>9606. ENSP00000261772, 9606. ENSP00000261868, 9606. ENSP00000262027</p> <p>9606. ENSP00000262584, 9606. ENSP00000264161, 9606. ENSP00000265753</p> <p>9606. ENSP00000266126, 9606. ENSP00000270625, 9606. ENSP00000272317</p> <p>9606. ENSP00000274606, 9606. ENSP00000278572, 9606. ENSP00000280557</p> <p>9606. ENSP00000281828, 9606. ENSP00000288937, 9606. ENSP00000289371</p> <p>9606. ENSP00000293831, 9606. ENSP00000296456, 9606. ENSP00000296577</p> <p>9606. ENSP00000296674, 9606. ENSP00000296674, 9606. ENSP00000300648</p> <p>9606. ENSP00000301457, 9606. ENSP00000302896, 9606. ENSP00000306548</p> <p>9606. ENSP00000307567, 9606. ENSP00000307889, 9606. ENSP00000307940</p> <p>9606. ENSP00000308275, 9606. ENSP00000309334, 9606. ENSP00000309830</p> <p>9606. ENSP00000311430, 9606. ENSP00000312311, 9606. ENSP00000313007</p> <p>9606. ENSP00000318646, 9606. ENSP00000320309, 9606. ENSP00000322419</p> <p>9606. ENSP00000322439, 9606. ENSP00000325448, 9606. ENSP00000326381</p> <p>9606. ENSP00000331901, 9606. ENSP00000332604, 9606. ENSP00000336702</p> <p>9606. ENSP00000336721, 9606. ENSP00000339063, 9606. ENSP00000339095</p> <p>9606. ENSP00000339795, 9606. ENSP00000341885, 9606. ENSP00000343885</p> <p>9606. ENSP00000345957, 9606. ENSP00000346001, 9606. ENSP00000346015</p> <p>9606. ENSP00000346027, 9606. ENSP00000346037, 9606. ENSP00000346046</p> <p>9606. ENSP00000346050, 9606. ENSP00000346067, 9606. ENSP00000346088</p> <p>9606. ENSP00000347495, 9606. ENSP00000348849, 9606. ENSP00000350512</p> <p>9606. ENSP00000353575, 9606. ENSP00000353741, 9606. ENSP00000354125</p> <p>9606. ENSP00000354125, 9606. ENSP00000354125, 9606. ENSP00000354125</p> <p>MRPS34, MRPL28, EIF3D, EIF5, EIF3E, RPL18A, AIMP2, RPL19, RPS12, RARS, EIF2AK2, SARS, EIF3K, RPS16, EIF2S3, MRPL4, EIF3G, PTC3, EIF2S1, NARS, RPL35, AARS, EIF3J, MARS, RPL8, DARS, EIF4H, EIF2B2, RPS11, RPS27A, NHP2, GGCT, RPS3, DENR, FAR5B, MRPL17, EIF5B, EIF4A1, BDH2, APEH, ABCE1, RPS23, GFM2, GCN1L1, NDUF7, RPS9, MRPL13, QARS, RPL13, EEF2, MRPL38, RPL15, RPL38, RPL4, MRPL46, PABPC1, RPS15A, FARSA, RPL2, TUFM, KARS, CNP2, EIF4A2, EEF1G, EIF3C, EIF5A, LARP1, EEF1A1, RPS7, RPL7, RPS2, PPA2, RPS21, RPL3, RPL27A, RPL21, RPLP1, RPS17, RPS3A, RPSA, RPL22, WARS, RPS26, COP55, EIF2B3, ETF1, EIF3B, RPL12, RPL39, IARS2, EPRS, RPS27, EIF3A, CLM, RPL5, MCTS1, MRPS2, RPL7A, MRPL14, MRPS18A, PABPC4, PPA1, YARS, EIF3I, RPS4X, RPL10A, EIF6, RPL11, EIF2S2, IARS, VARS, RRBP1, EEF1E1, RPS6, CARS, GARS, RPL13A, EEF1B2, RPL24, LARS, RPL34, AIMP1, RPL14, RPS8, RPL23L, HAGH, LARP4, DD3X, RPS14, RPL31, RBM4, TARS, EIF4B, RPL23A, RPS18, EIF2B4, RPL17, GSPT1, RPL9, AARSD1, RPL6, MRPL55, EEF1D, RPL10, RPS24, EIF4G1, RPL32, EIF2A, RPL29, RPL35A, EIF1, RPL23, EIF4E, HARS, GNB2L1, RPL30, RPS20, EIF3F, EIF4G2, RPS25, FAU, RPS13, EIF3M, RPL18, NACA, RPLP0, RPL28, RPL26, RPL36, RPL27, RPS19, RPS28, RPS5, OPLAH, RPS10, EIF3L</p> |  |  |  |



|            |                                                                     |     |          |        |        |     |                                                                                                                                                                                                                                                                                                                                                                                                                                                                                                                                                                                                                                                                                                                                                                                                                                                                                                                                                                                                                                                                                                                                                                                                                                                                                                                                                                                                                                                                                                                                                                                                                                                                                                                                                                                                                                                                                                                                                                                                                                                                                                                                                                                     |                                                                                                                                                                                                                                                                                                                                                                                                                                                                                                                                                                                                                                                                                                                    |
|------------|---------------------------------------------------------------------|-----|----------|--------|--------|-----|-------------------------------------------------------------------------------------------------------------------------------------------------------------------------------------------------------------------------------------------------------------------------------------------------------------------------------------------------------------------------------------------------------------------------------------------------------------------------------------------------------------------------------------------------------------------------------------------------------------------------------------------------------------------------------------------------------------------------------------------------------------------------------------------------------------------------------------------------------------------------------------------------------------------------------------------------------------------------------------------------------------------------------------------------------------------------------------------------------------------------------------------------------------------------------------------------------------------------------------------------------------------------------------------------------------------------------------------------------------------------------------------------------------------------------------------------------------------------------------------------------------------------------------------------------------------------------------------------------------------------------------------------------------------------------------------------------------------------------------------------------------------------------------------------------------------------------------------------------------------------------------------------------------------------------------------------------------------------------------------------------------------------------------------------------------------------------------------------------------------------------------------------------------------------------------|--------------------------------------------------------------------------------------------------------------------------------------------------------------------------------------------------------------------------------------------------------------------------------------------------------------------------------------------------------------------------------------------------------------------------------------------------------------------------------------------------------------------------------------------------------------------------------------------------------------------------------------------------------------------------------------------------------------------|
| GO:0000184 | nuclear-transcribed mRNA catabolic process, nonsense-mediated decay | 88  | 0.607222 | bottom | 0.0021 | ks  | <p>9606. ENSP00000220849, 9606. ENSP00000222247, 9606. ENSP00000225430</p> <p>9606. ENSP00000230050, 9606. ENSP00000251453, 9606. ENSP00000259469</p> <p>9606. ENSP00000262584, 9606. ENSP00000269349, 9606. ENSP00000270625</p> <p>9606. ENSP00000272317, 9606. ENSP00000278572, 9606. ENSP00000296674</p> <p>9606. ENSP00000302896, 9606. ENSP00000307889, 9606. ENSP00000309334</p> <p>9606. ENSP00000309830, 9606. ENSP00000311430, 9606. ENSP00000313007</p> <p>9606. ENSP00000318646, 9606. ENSP00000319240, 9606. ENSP00000322419</p> <p>9606. ENSP00000324804, 9606. ENSP00000325074, 9606. ENSP00000326806</p> <p>9606. ENSP00000339095, 9606. ENSP00000339795, 9606. ENSP00000341885</p> <p>9606. ENSP00000345957, 9606. ENSP00000346001, 9606. ENSP00000346015</p> <p>9606. ENSP00000346027, 9606. ENSP00000346037, 9606. ENSP00000346046</p> <p>9606. ENSP00000346050, 9606. ENSP00000346067, 9606. ENSP00000346088</p> <p>9606. ENSP00000348849, 9606. ENSP00000353741, 9606. ENSP00000354739</p> <p>9606. ENSP00000355315, 9606. ENSP00000357555, 9606. ENSP00000359345</p> <p>9606. ENSP00000361076, 9606. ENSP00000362744, 9606. ENSP00000363018</p> <p>9606. ENSP00000363676, 9606. ENSP00000364289, 9606. ENSP00000364543</p> <p>9606. ENSP00000369757, 9606. ENSP00000375730, 9606. ENSP00000377640</p> <p>9606. ENSP00000378163, 9606. ENSP00000379506, 9606. ENSP00000379888</p> <p>9606. ENSP00000385958, 9606. ENSP00000386717, 9606. ENSP00000389103</p> <p>9606. ENSP00000393241, 9606. ENSP00000397798, 9606. ENSP00000398131</p> <p>9606. ENSP00000400467, 9606. ENSP00000403172, 9606. ENSP00000413436</p> <p>9606. ENSP00000414321, 9606. ENSP00000416255, 9606. ENSP00000416429</p> <p>9606. ENSP00000418447, 9606. ENSP00000418868, 9606. ENSP00000419117</p> <p>9606. ENSP00000420311, 9606. ENSP00000428085, 9606. ENSP00000429374</p> <p>9606. ENSP00000435096, 9606. ENSP00000435370, 9606. ENSP00000435777</p> <p>9606. ENSP00000447001, 9606. ENSP00000449328, 9606. ENSP00000452909</p> <p>9606. ENSP00000457723, 9606. ENSP00000463058, 9606. ENSP00000463784</p> <p>9606. ENSP00000464342, 9606. ENSP00000464813, 9606. ENSP00000470142</p> | EIF3E, RPL18A, RPL19, RPS12, RPS16, RPL35, RPL8, EIF4A3, RPS11, RPS27A, RPS3, RPS23, RPS9, RPL13, RPL15, RPL38, RPL4, PABPC1, RPS15A, MAGOHB, RPLP2, PPP2R1A, PPP2R2A, NCBP2, RPS7, RPL7, RPS2, RPS21, RPL3, RPL27A, RPL21, RPLP1, RPS17, RPS3A, RPSA, RPL22, RPS26, ETF1, RPL12, RPL39, RPS27, RPL5, RPL7A, RPS4X, RPL10A, RPL11, NCBP1, SKIV2L, RPS6, RPL13A, RPL24, RPL34, RPL4, RPS8, RPS14, RPL31, RPL23A, RPS18, RPL17, GSPT1, RPL9, RPL6, RPL10, RPS24, EIF4G1, RPL32, PPP2CA, RPL29, RPL35A, RPL23, RPL30, RPS20, RPS25, FAU, RPS13, RPL18, RPLP0, RPL28, RNPS1, RBM8A, RPL26, RPL36, RPL27, UPF1, RPS19, RPS28, RPS5, RPS10                                                                               |
| GO:0070613 | regulation of protein processing                                    | 14  | 2.89355  | top    | 0.0046 | afc | <p>9606. ENSP00000216181, 9606. ENSP00000217131, 9606. ENSP00000225698</p> <p>9606. ENSP00000234590, 9606. ENSP00000245907, 9606. ENSP00000315130</p> <p>9606. ENSP00000356399, 9606. ENSP00000362924, 9606. ENSP00000379157</p> <p>9606. ENSP00000379191, 9606. ENSP00000416561, 9606. ENSP00000457243</p> <p>9606. ENSP00000479488, 9606. ENSP00000481314</p>                                                                                                                                                                                                                                                                                                                                                                                                                                                                                                                                                                                                                                                                                                                                                                                                                                                                                                                                                                                                                                                                                                                                                                                                                                                                                                                                                                                                                                                                                                                                                                                                                                                                                                                                                                                                                     | MYH9, CTSZ, C1QBP, ENO1, C3, CLU, CFH, GSN, CAST, CD59, CFB, NOL3, PHB, SNX12                                                                                                                                                                                                                                                                                                                                                                                                                                                                                                                                                                                                                                      |
| GO:0034660 | ncRNA metabolic process                                             | 100 | 0.473094 | bottom | 0.005  | ks  | <p>9606. ENSP00000168216, 9606. ENSP00000206542, 9606. ENSP00000216038</p> <p>9606. ENSP00000221801, 9606. ENSP00000223029, 9606. ENSP00000231572</p> <p>9606. ENSP00000234677, 9606. ENSP00000244051, 9606. ENSP00000246868</p> <p>9606. ENSP00000251453, 9606. ENSP00000256854, 9606. ENSP00000259469</p> <p>9606. ENSP00000261167, 9606. ENSP00000261601, 9606. ENSP00000261700</p> <p>9606. ENSP00000261772, 9606. ENSP00000262027, 9606. ENSP00000262160</p> <p>9606. ENSP00000264161, 9606. ENSP00000264279, 9606. ENSP00000264670</p> <p>9606. ENSP00000269349, 9606. ENSP00000274606, 9606. ENSP00000281828</p> <p>9606. ENSP00000301396, 9606. ENSP00000302886, 9606. ENSP00000302896</p> <p>9606. ENSP00000306565, 9606. ENSP00000307567, 9606. ENSP00000310448</p> <p>9606. ENSP00000318176, 9606. ENSP00000320309, 9606. ENSP00000325448</p> <p>9606. ENSP00000326806, 9606. ENSP00000339095, 9606. ENSP00000339795</p> <p>9606. ENSP00000341885, 9606. ENSP00000343885, 9606. ENSP00000345957</p> <p>9606. ENSP00000346046, 9606. ENSP00000346067, 9606. ENSP00000346694</p> <p>9606. ENSP00000347495, 9606. ENSP00000349541, 9606. ENSP00000355889</p> <p>9606. ENSP00000355890, 9606. ENSP00000356476, 9606. ENSP00000356530</p> <p>9606. ENSP00000357459, 9606. ENSP00000357555, 9606. ENSP00000358563</p> <p>9606. ENSP00000359345, 9606. ENSP00000361076, 9606. ENSP00000361186</p> <p>9606. ENSP00000362329, 9606. ENSP00000362532, 9606. ENSP00000362576</p> <p>9606. ENSP00000363018, 9606. ENSP00000363574, 9606. ENSP00000363676</p> <p>9606. ENSP00000364289, 9606. ENSP00000364794, 9606. ENSP00000364815</p> <p>9606. ENSP00000365522, 9606. ENSP00000366396, 9606. ENSP00000366934</p> <p>9606. ENSP00000369038, 9606. ENSP00000369757, 9606. ENSP00000369897</p> <p>9606. ENSP00000370589, 9606. ENSP00000370625, 9606. ENSP00000370745</p> <p>9606. ENSP00000373918, 9606. ENSP00000377954, 9606. ENSP00000377969</p> <p>9606. ENSP00000378191, 9606. ENSP00000379506, 9606. ENSP00000379888</p> <p>9606. ENSP00000380033, 9606. ENSP00000381216, 9606. ENSP00000383949</p> <p>9606. ENSP00000385958, 9606. ENSP00000386636, 9606. ENSP00000387710</p> | HSD17B10, OSGEP, RTCB, FBL, AIMP2, RARS, SARS, MOCS3, SBDS, RPS16, NARS, RPL35, WBP11, USP14, C14orf166, AARS, MARS, SMAD2, DARS, NOP58, NSUN2, EIF4A3, NHP2, FARSB, PELP1, PA2G4, RPS9, ISG2O, QARS, SART1, PRKRA, FARSA, KARS, NCBP2, RPS7, RPL7, RPS2, PPA2, RPS21, RPS17, RPSA, HNRNPA2B1, WARS, PTRF, IARS2, EPRS, TRMT1L, RNASEL, ADAR, RPS27, DKC1, RPL5, RPL7A, TP53RK, PPA1, RPRD1B, YARS, RPL10A, EIF6, RPL11, NCBP1, IARS, VARS, C9orf64, XRN2, NOL9, EEF1E1, RPS6, CAR5, NOP56, POLR2B, DDX1, GARS, LARS, LARS2, F2F1, AIMP1, RPL14, RPS8, DDX17, KHSRP, NHP2L1, RPS14, SSB, TAR5, EXOSC6, AARSD1, EBNA1BP2, RPS24, CDKN2A, RPL35A, NUDT16, HARS, RAN, RPL26, RPL27, RPS19, RPS28, WDR18, POLR2A, SRRT |

|            |                                      |     |          |        |        |    |                                                                                                                                                                                                                                                                                                                                                                                                                                                                                                                                                                                                                                                                                                                                                                                                                                                                                                                                                                                                                                                                                                                                                                                                                                                                                                                                                                                                                                                                                                                                                                                                                                                                                                                                                                                                                                                                                                                                                                                                                                                                                                                                                                                     |                                                                                                                                                                                                                                                                                                                                                                                                                                                                                                                                                                                                                                                                                                                                                                                                                                                                                        |  |  |  |
|------------|--------------------------------------|-----|----------|--------|--------|----|-------------------------------------------------------------------------------------------------------------------------------------------------------------------------------------------------------------------------------------------------------------------------------------------------------------------------------------------------------------------------------------------------------------------------------------------------------------------------------------------------------------------------------------------------------------------------------------------------------------------------------------------------------------------------------------------------------------------------------------------------------------------------------------------------------------------------------------------------------------------------------------------------------------------------------------------------------------------------------------------------------------------------------------------------------------------------------------------------------------------------------------------------------------------------------------------------------------------------------------------------------------------------------------------------------------------------------------------------------------------------------------------------------------------------------------------------------------------------------------------------------------------------------------------------------------------------------------------------------------------------------------------------------------------------------------------------------------------------------------------------------------------------------------------------------------------------------------------------------------------------------------------------------------------------------------------------------------------------------------------------------------------------------------------------------------------------------------------------------------------------------------------------------------------------------------|----------------------------------------------------------------------------------------------------------------------------------------------------------------------------------------------------------------------------------------------------------------------------------------------------------------------------------------------------------------------------------------------------------------------------------------------------------------------------------------------------------------------------------------------------------------------------------------------------------------------------------------------------------------------------------------------------------------------------------------------------------------------------------------------------------------------------------------------------------------------------------------|--|--|--|
| GO:0043062 | extracellular structure organization | 34  | 1.41803  | top    | 0.0053 | ks | <p>9606. ENSP0000007722, 9606. ENSP00000200181, 9606. ENSP00000218388</p> <p>9606. ENSP00000260408, 9606. ENSP00000261769, 9606. ENSP00000264144</p> <p>9606. ENSP00000265131, 9606. ENSP00000279441, 9606. ENSP00000288235</p> <p>9606. ENSP00000296585, 9606. ENSP00000324532, 9606. ENSP00000325941</p> <p>9606. ENSP00000327801, 9606. ENSP00000342098, 9606. ENSP00000345344</p> <p>9606. ENSP00000346032, 9606. ENSP00000349436, 9606. ENSP00000352673</p> <p>9606. ENSP00000355361, 9606. ENSP00000356954, 9606. ENSP00000357980</p> <p>9606. ENSP00000357981, 9606. ENSP00000358983, 9606. ENSP00000361405</p> <p>9606. ENSP00000363827, 9606. ENSP00000365569, 9606. ENSP00000368646</p> <p>9606. ENSP00000368678, 9606. ENSP00000372221, 9606. ENSP00000375778</p> <p>9606. ENSP00000386896, 9606. ENSP00000416330, 9606. ENSP00000417138</p> <p>9606. ENSP00000434412</p>                                                                                                                                                                                                                                                                                                                                                                                                                                                                                                                                                                                                                                                                                                                                                                                                                                                                                                                                                                                                                                                                                                                                                                                                                                                                                                | <p>ITGA3, ITGB4, TIMP1, ADAM10, CDH1, LAMC2, TNC, MMP10, MYO1E</p> <p>, ITGA2, LAMA3, RIC8A, P4HB, SPINT1, CTSL, ANXA2, ADAM15, ELF3, C</p> <p>D47, CTGF, HTRA1, CTSS, NFKB2, MMP9, HSPG2, FLOT1, PRDX4, AGR</p> <p>N, SERPINB5, LAMB3, ITGA6, TGFB1, PLTP, SERPINH1</p>                                                                                                                                                                                                                                                                                                                                                                                                                                                                                                                                                                                                               |  |  |  |
| GO:0006413 | translational initiation             | 110 | 0.529674 | bottom | 0.0063 | ks | <p>9606. ENSP00000216190, 9606. ENSP00000216554, 9606. ENSP00000220849</p> <p>9606. ENSP00000222247, 9606. ENSP00000225430, 9606. ENSP00000230050</p> <p>9606. ENSP00000248342, 9606. ENSP00000251453, 9606. ENSP00000253039</p> <p>9606. ENSP00000253108, 9606. ENSP00000256383, 9606. ENSP00000259469</p> <p>9606. ENSP00000261868, 9606. ENSP00000262584, 9606. ENSP00000265753</p> <p>9606. ENSP00000266126, 9606. ENSP00000270625, 9606. ENSP00000272317</p> <p>9606. ENSP00000278572, 9606. ENSP00000280557, 9606. ENSP00000289371</p> <p>9606. ENSP00000293831, 9606. ENSP00000296577, 9606. ENSP00000296674</p> <p>9606. ENSP00000302896, 9606. ENSP00000307889, 9606. ENSP00000309334</p> <p>9606. ENSP00000309830, 9606. ENSP00000311430, 9606. ENSP00000313007</p> <p>9606. ENSP00000318646, 9606. ENSP00000322419, 9606. ENSP00000326384</p> <p>9606. ENSP00000332604, 9606. ENSP00000336721, 9606. ENSP00000339095</p> <p>9606. ENSP00000339795, 9606. ENSP00000341885, 9606. ENSP00000345957</p> <p>9606. ENSP00000346001, 9606. ENSP00000346015, 9606. ENSP00000346027</p> <p>9606. ENSP00000346037, 9606. ENSP00000346046, 9606. ENSP00000346050</p> <p>9606. ENSP00000346067, 9606. ENSP00000346088, 9606. ENSP00000348849</p> <p>9606. ENSP00000350512, 9606. ENSP00000353575, 9606. ENSP00000354129</p> <p>9606. ENSP00000354739, 9606. ENSP00000355315, 9606. ENSP00000357559</p> <p>9606. ENSP00000358140, 9606. ENSP00000359345, 9606. ENSP00000360365</p> <p>9606. ENSP00000361076, 9606. ENSP00000362688, 9606. ENSP00000362744</p> <p>9606. ENSP00000363018, 9606. ENSP00000363574, 9606. ENSP00000363676</p> <p>9606. ENSP00000364119, 9606. ENSP00000369757, 9606. ENSP00000375730</p> <p>9606. ENSP00000377640, 9606. ENSP00000378163, 9606. ENSP00000379506</p> <p>9606. ENSP00000379888, 9606. ENSP00000382840, 9606. ENSP00000385958</p> <p>9606. ENSP00000386717, 9606. ENSP00000386894, 9606. ENSP00000388806</p> <p>9606. ENSP00000389103, 9606. ENSP00000393241, 9606. ENSP00000394869</p> <p>9606. ENSP00000397798, 9606. ENSP00000400467, 9606. ENSP00000403172</p> <p>9606. ENSP00000413436, 9606. ENSP00000414321, 9606. ENSP00000416255</p> | <p>EIF3D, EIF5, EIF3E, RPL18A, RPL19, RPS12, EIF3K, RPS16, EIF2S3, EIF3G</p> <p>, EIF2S1, RPL35, EIF3J, RPL8, EIF4H, EIF2B2, RPS11, RPS27A, RPS3, DEN</p> <p>R, EIF5B, EIF4A1, ABCE1, RPS23, RPS9, RPL13, RPL15, RPL38, RPL4, PAR</p> <p>PC1, RPS15A, RPLP2, EIF4A2, EIF3C, LARP1, RPS7, RPL7, RPS21, R</p> <p>PL3, RPL27A, RPL21, RPLP1, RPS17, RPS3A, RPSA, RPL22, RPS26, COPS</p> <p>5, EIF2B3, EIF3B, RPL12, RPL39, RPS27, EIF3A, RPL5, MCTS1, RPL7A, EIF</p> <p>3I, RPS4X, RPL10A, EIF6, RPL11, EIF2S2, RPS6, RPL13A, RPL24, RPL34, R</p> <p>PL14, RPS8, DDX3X, RPS14, RPL31, RBM4, EIF4B, RPL23A, RPS18, EIF2</p> <p>B4, RPL17, RPL9, RPL6, RPL10, RPS24, EIF4G1, RPL32, EIF2A, RPL29, RP</p> <p>L35A, EIF1, RPL23, EIF4E, RPL30, RPS20, EIF3F, EIF4G2, RPS25, FAU, RP</p> <p>S13, EIF3M, RPL18, RPLP0, RPL28, RPL26, RPL36, RPL27, RPS19, RPS28</p> <p>, RPS5, RPS10, EIF3L</p> |  |  |  |
| GO:0042060 | wound healing                        | 62  | 1.19471  | top    | 0.0065 | ks | <p>9606. ENSP00000078429, 9606. ENSP00000161559, 9606. ENSP00000215832</p> <p>9606. ENSP00000218388, 9606. ENSP00000220763, 9606. ENSP00000220809</p> <p>9606. ENSP00000225698, 9606. ENSP00000229795, 9606. ENSP00000255194</p> <p>9606. ENSP00000262160, 9606. ENSP00000263025, 9606. ENSP00000263168</p> <p>9606. ENSP00000263277, 9606. ENSP00000265131, 9606. ENSP00000265563</p> <p>9606. ENSP00000278568, 9606. ENSP00000286548, 9606. ENSP00000296511</p> <p>9606. ENSP00000296585, 9606. ENSP00000311032, 9606. ENSP00000320171</p> <p>9606. ENSP00000328405, 9606. ENSP00000348461, 9606. ENSP00000349436</p> <p>9606. ENSP00000352208, 9606. ENSP00000352252, 9606. ENSP00000353590</p> <p>9606. ENSP00000354573, 9606. ENSP00000354947, 9606. ENSP00000357722</p> <p>9606. ENSP00000358866, 9606. ENSP00000360141, 9606. ENSP00000361850</p> <p>9606. ENSP00000361949, 9606. ENSP00000362924, 9606. ENSP00000366109</p> <p>9606. ENSP00000369129, 9606. ENSP00000370542, 9606. ENSP00000371958</p> <p>9606. ENSP00000376475, 9606. ENSP00000376506, 9606. ENSP00000376800</p> <p>9606. ENSP00000377055, 9606. ENSP00000377471, 9606. ENSP00000379191</p> <p>9606. ENSP00000379287, 9606. ENSP00000383118, 9606. ENSP00000391592</p> <p>9606. ENSP00000393840, 9606. ENSP00000400175, 9606. ENSP00000400717</p> <p>9606. ENSP00000401010, 9606. ENSP00000401645, 9606. ENSP00000407375</p> <p>9606. ENSP00000428924, 9606. ENSP00000430432, 9606. ENSP00000448035</p> <p>9606. ENSP00000458832, 9606. ENSP00000478026, 9606. ENSP00000479153</p> <p>9606. ENSP00000481878, 9606. ENSP00000484472</p>                                                                                                                                                                                                                                                                                                                                                                                                                                                                                                                                                                     | <p>GNA11, CEACAM1, MAPK1, TIMP1, CPQ, PLAT, C1QBP, MAPK14, AP3</p> <p>B1, SMAD2, MAPK3, CAPZA1, EHD2, TNC, PRKAR2A, PAK1, GNAQ, AN</p> <p>XAS, ITGA2, CASP3, PKM, DGKA, RAC1, ADAM15, MYOF, HIST1H3J, M</p> <p>YH10, MACF1, CAPZA2, S100A8, FLNA, GNAS, PLAU, PABPC4, GSN, AN</p> <p>XA1, DSP, SDC1, CD9, PRKAR1A, PDCD10, MTPN, PRCP, CORO1B, CD5</p> <p>9, YWHAZ, CDC42, PTPN6, BLOC1S3, RHOA, GNA13, CAPZB, SERPINB</p> <p>2, GPX1, LYN, HDAC2, NACA, ALOX15, ANXA8, EHD1, GNB1, EPPK1</p>                                                                                                                                                                                                                                                                                                                                                                                          |  |  |  |

|            |                                                   |     |          |        |        |    |                                                                                                                                                                                                                                                                                                                                                                                                                                                                                                                                                                                                                                                                                                                                                                                                                                                                                                                                                                                                                                                                                                                                                                                                                                                                                                                                                                                                                                                                                                                                                                                                                                                                                                                                                                                                                                                                                                                                                                                                                                                                                                                              |                                                                                                                                                                                                                                                                                                                                                                                                                                                                                                                                                                                                                                                                                                                                                         |  |  |  |
|------------|---------------------------------------------------|-----|----------|--------|--------|----|------------------------------------------------------------------------------------------------------------------------------------------------------------------------------------------------------------------------------------------------------------------------------------------------------------------------------------------------------------------------------------------------------------------------------------------------------------------------------------------------------------------------------------------------------------------------------------------------------------------------------------------------------------------------------------------------------------------------------------------------------------------------------------------------------------------------------------------------------------------------------------------------------------------------------------------------------------------------------------------------------------------------------------------------------------------------------------------------------------------------------------------------------------------------------------------------------------------------------------------------------------------------------------------------------------------------------------------------------------------------------------------------------------------------------------------------------------------------------------------------------------------------------------------------------------------------------------------------------------------------------------------------------------------------------------------------------------------------------------------------------------------------------------------------------------------------------------------------------------------------------------------------------------------------------------------------------------------------------------------------------------------------------------------------------------------------------------------------------------------------------|---------------------------------------------------------------------------------------------------------------------------------------------------------------------------------------------------------------------------------------------------------------------------------------------------------------------------------------------------------------------------------------------------------------------------------------------------------------------------------------------------------------------------------------------------------------------------------------------------------------------------------------------------------------------------------------------------------------------------------------------------------|--|--|--|
| GO:0090150 | establishment of protein localization to membrane | 104 | 0.467158 | bottom | 0.0099 | ks | <p>9606. ENSP0000054666, 9606. ENSP00000216034, 9606. ENSP00000217402<br/> 9606. ENSP00000222247, 9606. ENSP00000225430, 9606. ENSP00000230050<br/> 9606. ENSP00000251453, 9606. ENSP00000253861, 9606. ENSP00000259469<br/> 9606. ENSP00000260130, 9606. ENSP00000262584, 9606. ENSP00000264710<br/> 9606. ENSP00000267884, 9606. ENSP00000269228, 9606. ENSP00000270625<br/> 9606. ENSP00000272317, 9606. ENSP00000278572, 9606. ENSP00000280772<br/> 9606. ENSP00000293288, 9606. ENSP00000295797, 9606. ENSP00000296674<br/> 9606. ENSP00000299138, 9606. ENSP00000302896, 9606. ENSP00000302961<br/> 9606. ENSP00000307889, 9606. ENSP00000309334, 9606. ENSP00000309830<br/> 9606. ENSP00000311430, 9606. ENSP00000312066, 9606. ENSP00000318646<br/> 9606. ENSP00000318822, 9606. ENSP00000322419, 9606. ENSP00000333547<br/> 9606. ENSP00000335153, 9606. ENSP00000339095, 9606. ENSP00000339795<br/> 9606. ENSP00000341885, 9606. ENSP00000342181, 9606. ENSP00000345445<br/> 9606. ENSP00000345957, 9606. ENSP00000346001, 9606. ENSP00000346015<br/> 9606. ENSP00000346027, 9606. ENSP00000346037, 9606. ENSP00000346046<br/> 9606. ENSP00000346050, 9606. ENSP00000346067, 9606. ENSP00000346088<br/> 9606. ENSP00000348849, 9606. ENSP00000349259, 9606. ENSP00000352834<br/> 9606. ENSP00000354573, 9606. ENSP00000354739, 9606. ENSP00000355315<br/> 9606. ENSP00000356790, 9606. ENSP00000357555, 9606. ENSP00000359345<br/> 9606. ENSP00000361076, 9606. ENSP00000362744, 9606. ENSP00000363018<br/> 9606. ENSP00000363676, 9606. ENSP00000363921, 9606. ENSP00000365131<br/> 9606. ENSP00000365606, 9606. ENSP00000368022, 9606. ENSP00000369757<br/> 9606. ENSP00000373487, 9606. ENSP00000375730, 9606. ENSP00000377640<br/> 9606. ENSP00000378040, 9606. ENSP00000378163, 9606. ENSP00000379506<br/> 9606. ENSP00000379888, 9606. ENSP00000385958, 9606. ENSP00000386717<br/> 9606. ENSP00000389103, 9606. ENSP00000393241, 9606. ENSP00000397798<br/> 9606. ENSP00000400467, 9606. ENSP00000403172, 9606. ENSP00000413436<br/> 9606. ENSP00000414321, 9606. ENSP00000416429, 9606. ENSP00000418868</p> | <p>VAMP3, TOMM22, CHMP4B, RPL18A, RPL19, RPS12, RPS16, EXOC4, RPL35, SDCBP, RPL8, RAB10, SRP14, NPC1, RPS11, RPS27A, RPS3, ANK3, BAX, PRKCI, RPS23, VPS35, RPS9, HSPA4, RPL13, RPL15, RPL38, RPL4, SRP68, RPS15A, BID, RPLP2, RAB11B, HSP90AA1, RPS7, RPL7, RPS2, SRP72, SAMM50, RPS21, RPL3, RPL27A, RPL21, RPLP1, RPS17, RPS3A, RPSA, RPL22, RPS26, SPTBN1, MYO1C, MACF1, RPL12, RPL39, ATP1B1, RPS27, RPL5, RPL7A, RPS4X, RPL10A, RPL11, PARD3, BAG6, GRIPAP1, OPTN, RPS6, KRT18, RPL13A, RPL24, BAD, RPL34, RPL14, RPS8, RPS14, RPL31, RPL23A, RPS18, RPL17, RPL9, RPL6, RPL10, RPS24, RPL32, RPL29, RPL35A, RPL23, NDUFA13, RPL30, RPS20, RPS25, FAU, RPS13, RPL18, RPLP0, RPL28, RPL26, RPL36, RPL27, ASNA1, RPS19, RPS28, RPS5, CLIP1, RPS10</p> |  |  |  |
|------------|---------------------------------------------------|-----|----------|--------|--------|----|------------------------------------------------------------------------------------------------------------------------------------------------------------------------------------------------------------------------------------------------------------------------------------------------------------------------------------------------------------------------------------------------------------------------------------------------------------------------------------------------------------------------------------------------------------------------------------------------------------------------------------------------------------------------------------------------------------------------------------------------------------------------------------------------------------------------------------------------------------------------------------------------------------------------------------------------------------------------------------------------------------------------------------------------------------------------------------------------------------------------------------------------------------------------------------------------------------------------------------------------------------------------------------------------------------------------------------------------------------------------------------------------------------------------------------------------------------------------------------------------------------------------------------------------------------------------------------------------------------------------------------------------------------------------------------------------------------------------------------------------------------------------------------------------------------------------------------------------------------------------------------------------------------------------------------------------------------------------------------------------------------------------------------------------------------------------------------------------------------------------------|---------------------------------------------------------------------------------------------------------------------------------------------------------------------------------------------------------------------------------------------------------------------------------------------------------------------------------------------------------------------------------------------------------------------------------------------------------------------------------------------------------------------------------------------------------------------------------------------------------------------------------------------------------------------------------------------------------------------------------------------------------|--|--|--|

T = 72 h, IFN $\alpha$ 16: CoV-2 / mock

| #Term ID   | Term Description                          | Genes Mapped | Enrichment Score | Direction | False Discovery Rate | Method | Matching Proteins in Your Input (IDs)                                                                                                                                                                                                                                                                                                                                | Matching Proteins in Your Input (Labels)                                                           |
|------------|-------------------------------------------|--------------|------------------|-----------|----------------------|--------|----------------------------------------------------------------------------------------------------------------------------------------------------------------------------------------------------------------------------------------------------------------------------------------------------------------------------------------------------------------------|----------------------------------------------------------------------------------------------------|
| GO:0002673 | regulation of acute inflammatory response | 10           | 4.99106          | top       | 0.0000398            | afc    | 9606.ENSP00000225698,9606.ENSP00000245907,9606.ENSP00000315130,9606.ENSP00000356399,9606.ENSP00000379191,9606.ENSP00000381607,9606.ENSP00000415941,9606.ENSP00000416561,9606.ENSP00000418770,9606.ENSP00000479488                                                                                                                                                    | C1QBP,C3,CLU,CFH,CD59,GSTP1,C4B,CFB,PARK7,PHB                                                      |
| GO:0016266 | O-glycan processing                       | 8            | 5.4561           | top       | 0.0000398            | afc    | 9606.ENSP00000287590,9606.ENSP00000321874,9606.ENSP00000360776,9606.ENSP00000381008,9606.ENSP00000417498,9606.ENSP00000436812,9606.ENSP00000484824,9606.ENSP00000485028                                                                                                                                                                                              | B3GNT7,B3GNT3,B4GALT5,MUC16,MUC4,MUC5B,MUC1,MUC13                                                  |
| GO:0030449 | regulation of complement activation       | 8            | 5.49766          | top       | 0.0000398            | afc    | 9606.ENSP00000225698,9606.ENSP00000245907,9606.ENSP00000315130,9606.ENSP00000356399,9606.ENSP00000379191,9606.ENSP00000415941,9606.ENSP00000416561,9606.ENSP00000479488                                                                                                                                                                                              | C1QBP,C3,CLU,CFH,CD59,C4B,CFB,PHB                                                                  |
| GO:2000257 | regulation of protein activation cascade  | 8            | 5.49766          | top       | 0.0000398            | afc    | 9606.ENSP00000225698,9606.ENSP00000245907,9606.ENSP00000315130,9606.ENSP00000356399,9606.ENSP00000379191,9606.ENSP00000415941,9606.ENSP00000416561,9606.ENSP00000479488                                                                                                                                                                                              | C1QBP,C3,CLU,CFH,CD59,C4B,CFB,PHB                                                                  |
| GO:0006956 | complement activation                     | 6            | 6.45766          | top       | 0.0000531            | afc    | 9606.ENSP00000225698,9606.ENSP00000245907,9606.ENSP00000315130,9606.ENSP00000356399,9606.ENSP00000415941,9606.ENSP00000416561                                                                                                                                                                                                                                        | C1QBP,C3,CLU,CFH,C4B,CFB                                                                           |
| GO:0019730 | antimicrobial humoral response            | 17           | 3.4345           | top       | 0.0000531            | afc    | 9606.ENSP00000229239,9606.ENSP00000253354,9606.ENSP00000254301,9606.ENSP00000315130,9606.ENSP00000342082,9606.ENSP00000346251,9606.ENSP00000355315,9606.ENSP00000357722,9606.ENSP00000357727,9606.ENSP00000357905,9606.ENSP00000362108,9606.ENSP00000379873,9606.ENSP00000428085,9606.ENSP00000435370,9606.ENSP00000452780,9606.ENSP00000470972,9606.ENSP00000483599 | GAPDH,BPIFB1,LGALS3,CLU,SLPI,BPIFA1,RPL39,S100A8,S100A9,DMBT1,LCN2,HLA-A,RPL30,FAU,B2M,RPS19,SPON2 |
| GO:0002920 | regulation of humoral immune response     | 9            | 4.91396          | top       | 0.0000682            | afc    | 9606.ENSP00000225698,9606.ENSP00000245907,9606.ENSP00000315130,9606.ENSP00000356399,9606.ENSP00000379191,9606.ENSP00000391592,9606.ENSP00000415941,9606.ENSP00000416561,9606.ENSP00000479488                                                                                                                                                                         | C1QBP,C3,CLU,CFH,CD59,PTPN6,C4B,CFB,PHB                                                            |
| GO:0072376 | protein activation cascade                | 7            | 5.27166          | top       | 0.00034              | afc    | 9606.ENSP00000225698,9606.ENSP00000245907,9606.ENSP00000315130,9606.ENSP00000356399,9606.ENSP00000377055,9606.ENSP00000415941,9606.ENSP00000416561                                                                                                                                                                                                                   | C1QBP,C3,CLU,CFH,PRCP,C4B,CFB                                                                      |

|            |                                            |     |          |        |         |     |                                                                                                                                                                                                                                                                                                                                                                                                                                                                                                                                                                                                                                                                                                                                                                                                                                                                                                                                                                                                                                                                                                                                                                                                                                                                                                                                                                                                                                                                                                                                                                                                                                                                                                             |                                                                                                                                                                                                                                                                                                                                                                                                                                                                                                                                                                                                                                                                                                                                                                                                                                                                                                                                                                                                                                               |
|------------|--------------------------------------------|-----|----------|--------|---------|-----|-------------------------------------------------------------------------------------------------------------------------------------------------------------------------------------------------------------------------------------------------------------------------------------------------------------------------------------------------------------------------------------------------------------------------------------------------------------------------------------------------------------------------------------------------------------------------------------------------------------------------------------------------------------------------------------------------------------------------------------------------------------------------------------------------------------------------------------------------------------------------------------------------------------------------------------------------------------------------------------------------------------------------------------------------------------------------------------------------------------------------------------------------------------------------------------------------------------------------------------------------------------------------------------------------------------------------------------------------------------------------------------------------------------------------------------------------------------------------------------------------------------------------------------------------------------------------------------------------------------------------------------------------------------------------------------------------------------|-----------------------------------------------------------------------------------------------------------------------------------------------------------------------------------------------------------------------------------------------------------------------------------------------------------------------------------------------------------------------------------------------------------------------------------------------------------------------------------------------------------------------------------------------------------------------------------------------------------------------------------------------------------------------------------------------------------------------------------------------------------------------------------------------------------------------------------------------------------------------------------------------------------------------------------------------------------------------------------------------------------------------------------------------|
| GO:0006397 | mRNA processing                            | 158 | 0.947642 | bottom | 0.00036 | ks  | <p>9606.ENSP00000215793,9606.ENSP00000215829,9606.ENSP00000216727,9606.ENSP00000217109,9606.ENSP00000221419,9606.ENSP00000221494,9606.ENSP00000225698,9606.ENSP00000225792,9606.ENSP00000227524,9606.ENSP00000228284,9606.ENSP00000229390,9606.ENSP00000238112,9606.ENSP00000240185,9606.ENSP00000243563,9606.ENSP00000244020,9606.ENSP00000246194,9606.ENSP00000249299,9606.ENSP00000253363,9606.ENSP00000254108,9606.ENSP00000254193,9606.ENSP00000254301,9606.ENSP00000258962,9606.ENSP00000261167,9606.ENSP00000261531,9606.ENSP00000261973,9606.ENSP00000262710,9606.ENSP00000263579,9606.ENSP00000263694,9606.ENSP00000265866,9606.ENSP00000265872,9606.ENSP00000266079,9606.ENSP00000266679,9606.ENSP00000269349,9606.ENSP00000276079,9606.ENSP00000282007,9606.ENSP00000283179,9606.ENSP00000291552,9606.ENSP00000293677,9606.ENSP00000297071,9606.ENSP00000300291,9606.ENSP00000300413,9606.ENSP00000301740,9606.ENSP00000302160,9606.ENSP00000304903,9606.ENSP00000305556,9606.ENSP00000305790,9606.ENSP00000307863,9606.ENSP00000310448,9606.ENSP00000310670,9606.ENSP00000310723,9606.ENSP00000311677,9606.ENSP00000313007,9606.ENSP00000313199,9606.ENSP00000313829,9606.ENSP00000316042,9606.ENSP00000317123,9606.ENSP00000318861,9606.ENSP00000319169,9606.ENSP00000324122,9606.ENSP00000325376,9606.ENSP00000325377,9606.ENSP00000325905,9606.ENSP00000326806,9606.ENSP00000328848,9606.ENSP00000335321,9606.ENSP00000336741,9606.ENSP00000336752,9606.ENSP00000337632,9606.ENSP00000339245,9606.ENSP00000340796,9606.ENSP00000340823,9606.ENSP00000341826,9606.ENSP00000342374,9606.ENSP00000343966,9606.ENSP00000346634,9606.ENSP00000245907,9606.ENSP00000356399,9606.ENSP0000416561</p> | <p>SF3A1,SNRPD3,PABPN1,CSTF1,HNRNPL,SF3A2,C1QBP,DDX5,PRPF19,SART3,SRSF9,CPSF3,TARDBP,SNRPA,SRSF6,RALY,LSM8,RBM39,FUS,SNRPA1,LGALS3,SRSF1,WBP11,SNW1,RBM25,ACIN1,DPS,SNRNP40,HNRNPH3,CCAR1,PRPF6,CPSF6,EIF4A3,NONO,ZC3H13,HNRNPU,U2AFBP,RAVER1,TRA2A,NUDT21,SNRPD1,SRRM2,LSM3,CD2BP2,PCBP1,SF3B3,U2AF2,SART1,CCAR2,DDX23,PPP1R8,PABPC1,HNRNPD,KHDRBS1,HNRNPA0,SNRNP200,SF3B2,PRMT5,PRPF31,HNRNPM,WDR33,SRSF7,NCBP2,RBM10,SF3B1,DHX15,FIP1L1,SARNP,YTHDC1,ZNF326,GTF2F2,HNRNPA1,SNRPD2,PSPC1,THRAP3,HNRNPA2B1,CGI-74,SON,HNRNPH1,PTBP1,SFPQ,WTAP,PCBP2,CTNBL1,CDC73,DHX9,RNASEL,ADAR,SYNCRIP,RBM15,AHCYL1,FMR1,RBMX,SRSF11,CDC5L,YBX1,HNRNPH2,CSTF2,SF3A3,SRSF3,HNRNPR,NCBP1,LSM2,HNRNPK,XRN2,SF1,POLR2B,DDX1,RNMT,HNRNPUL1,SRSF2,HNRNPA3,GTF2F1,DDX39B,DDX17,SMU1,KHSRP,KDM1A,NHP2L1,ELAVL1,PRPF40A,RBM4,EFTUD2,STRAP,POLDIP3,HNRNPF,SNRPE,PNPT1,ESRP1,SNRPB,PTBP3,DDX46,TRA2B,U2SURP,SRSF10,ALYREF,LSM6,PLRG1,LUC7L3,HSPA8,CLNS1A,PUF60,CELF1,CHERP,HNRNPC,SRSF5,NOL3,RNPS1,PRPF8,RBM8A,DDX42,LSM4,SUPT5H,SNRNP70,POLR2A,SRRT,SAP18,CPSF1</p> |
| GO:0006957 | complement activation, alternative pathway | 3   | 8.45935  | top    | 0.00055 | afc | <p>9606.ENSP00000245907,9606.ENSP00000356399,9606.ENSP0000416561</p>                                                                                                                                                                                                                                                                                                                                                                                                                                                                                                                                                                                                                                                                                                                                                                                                                                                                                                                                                                                                                                                                                                                                                                                                                                                                                                                                                                                                                                                                                                                                                                                                                                        | C3,CFH,CFB                                                                                                                                                                                                                                                                                                                                                                                                                                                                                                                                                                                                                                                                                                                                                                                                                                                                                                                                                                                                                                    |

|            |                                |     |          |        |         |     |                                                                                                                                                                                                                                                                                                                                                                                                                                                                                                                                                                                                                                                                                                                                                                                                                                                                                                                                                                                                                                                                                                                                                                                                                                                                                                                                                                                                                                                                                                                                                                                                                                                                                                                                                                                                                                                                                                                                               |                                                                                                                                                                                                                                                                                                                                                                                                                                                                                                                                                                                                                                                                                                                                                                                                                                                                                                                                                                                                    |
|------------|--------------------------------|-----|----------|--------|---------|-----|-----------------------------------------------------------------------------------------------------------------------------------------------------------------------------------------------------------------------------------------------------------------------------------------------------------------------------------------------------------------------------------------------------------------------------------------------------------------------------------------------------------------------------------------------------------------------------------------------------------------------------------------------------------------------------------------------------------------------------------------------------------------------------------------------------------------------------------------------------------------------------------------------------------------------------------------------------------------------------------------------------------------------------------------------------------------------------------------------------------------------------------------------------------------------------------------------------------------------------------------------------------------------------------------------------------------------------------------------------------------------------------------------------------------------------------------------------------------------------------------------------------------------------------------------------------------------------------------------------------------------------------------------------------------------------------------------------------------------------------------------------------------------------------------------------------------------------------------------------------------------------------------------------------------------------------------------|----------------------------------------------------------------------------------------------------------------------------------------------------------------------------------------------------------------------------------------------------------------------------------------------------------------------------------------------------------------------------------------------------------------------------------------------------------------------------------------------------------------------------------------------------------------------------------------------------------------------------------------------------------------------------------------------------------------------------------------------------------------------------------------------------------------------------------------------------------------------------------------------------------------------------------------------------------------------------------------------------|
| GO:0008380 | RNA splicing                   | 151 | 0.983547 | bottom | 0.00055 | ks  | 9606. ENSP00000215793,9606. ENSP00000215829,9606. ENSP00000216038,9606. ENSP00000216727,9606. ENSP00000217109,9606. ENSP00000221419,9606. ENSP00000221494,9606. ENSP00000225698,9606. ENSP00000225792,9606. ENSP00000227524,9606. ENSP00000228284,9606. ENSP00000229390,9606. ENSP00000238112,9606. ENSP00000240185,9606. ENSP00000243563,9606. ENSP00000244020,9606. ENSP00000246194,9606. ENSP00000249299,9606. ENSP00000253363,9606. ENSP00000254108,9606. ENSP00000254193,9606. ENSP00000254301,9606. ENSP00000258962,9606. ENSP00000261167,9606. ENSP00000261531,9606. ENSP00000261700,9606. ENSP00000261973,9606. ENSP00000262710,9606. ENSP00000263579,9606. ENSP00000263694,9606. ENSP00000265866,9606. ENSP00000265872,9606. ENSP00000266079,9606. ENSP00000269349,9606. ENSP00000276079,9606. ENSP00000282007,9606. ENSP00000283179,9606. ENSP00000291552,9606. ENSP00000293677,9606. ENSP00000297071,9606. ENSP00000300291,9606. ENSP00000300413,9606. ENSP00000301740,9606. ENSP00000302160,9606. ENSP00000304903,9606. ENSP00000305556,9606. ENSP00000305790,9606. ENSP00000306117,9606. ENSP00000307863,9606. ENSP00000310448,9606. ENSP00000310670,9606. ENSP00000310723,9606. ENSP00000311677,9606. ENSP00000313007,9606. ENSP00000313199,9606. ENSP00000316042,9606. ENSP00000317123,9606. ENSP00000318861,9606. ENSP00000319169,9606. ENSP00000324122,9606. ENSP00000324804,9606. ENSP00000325376,9606. ENSP00000325377,9606. ENSP00000325905,9606. ENSP00000326806,9606. ENSP00000328848,9606. ENSP00000335321,9606. ENSP00000336741,9606. ENSP00000336752,9606. ENSP00000339245,9606. ENSP00000340796,9606. ENSP00000340823,9606. ENSP00000341826,9606. ENSP00000342374,9606. ENSP00000343966,9606. ENSP00000247020,9606. ENSP00000287590,9606. ENSP00000321874,9606. ENSP00000360776,9606. ENSP00000381008,9606. ENSP00000417498,9606. ENSP00000425809,9606. ENSP00000436812,9606. ENSP00000484824,9606. ENSP00000485028 | SF3A1,SNRPD3,RTCB,PABPN1,CSTF1,HNRNPL,SF3A2,C1QBP,DDX5,PRPF19,SART3,SRSF9,CPSF3,TARDBP,SNRPA,SRSF6,RALY,LSM8,RBM39,FUS,SNRPA1,LGALS3,SRSF1,WBP11,SNW1,C14orf16,6,RBM25,ACIN1,DCPS,SNRNP40,HNRNPH3,CCAR1,PRPF6,EIF4A3,NONO,ZC3H13,HNRNPU,U2AFBP,RAVER1,TRA2A,NUDT21,SNRPD1,SRRM2,LSM3,CD2BP2,PCBP1,SF3B3,DDX19A,U2AF2,SART1,CCAR2,DDX23,PPP1R8,PABPC1,HNRNPD,HNRNPA0,SNRNP200,SF3B2,PRMT5,PRPF31,PPP2R1A,HNRNPM,WDR33,SRSF7,NCBP2,RBM10,SF3B1,DHX15,FIP11L1,YTHDC1,ZNF326,UTF2F2,HNRNPA1,SNRPD2,PSPC1,THRAP3,HNRNPA2B1,CGI-74,SON,HNRNPH1,PTBP1,SFPQ,WTAP,PCBP2,CTNBL1,DHX9,SYNERIP,RBM15,FMR1,RBMX,SRSF11,CDC5L,YBX1,HNRNPH2,CSTF2,SF3A3,SRSF3,HNRNPR,NCBP1,LSM2,HNRNPK,SF1,POLR2B,DDX1,HNRNPU1,SRSF2,HNRNPA3,UTF2F1,DDX39B,DDX17,SMU1,KHSRP,KDM1A,NHP2L1,ELAVL1,PRPF40A,RBM4,EFTUD2,STRAP,HNRNPF,SNRPE,ESRP1,SNRNPB,PTBP3,DDX46,TRA2B,PPP2CA,U2SURP,SRSF10,ALYREF,LSM6,PLRG1,LUC7L3,HSPA8,CLNS1A,PUF60,CELF1,CHERP,HNRNPC,SRSF5,NOL3,RNPS1,PRPF8,RBM8A,DDX42,LSM4,SNRNP70,POLR2A,SRRT,SAP18,CPSF1 |
| GO:0006493 | protein O-linked glycosylation | 10  | 3.94918  | top    | 0.0014  | afc | 9606. ENSP00000247020,9606. ENSP00000287590,9606. ENSP00000321874,9606. ENSP00000360776,9606. ENSP00000381008,9606. ENSP00000417498,9606. ENSP00000425809,9606. ENSP00000436812,9606. ENSP00000484824,9606. ENSP00000485028                                                                                                                                                                                                                                                                                                                                                                                                                                                                                                                                                                                                                                                                                                                                                                                                                                                                                                                                                                                                                                                                                                                                                                                                                                                                                                                                                                                                                                                                                                                                                                                                                                                                                                                   | SDF2,B3GNT7,B3GNT3,B4GALT5,MUC16,MUC4,PGM3,MUC5B,MUC1,MUC13                                                                                                                                                                                                                                                                                                                                                                                                                                                                                                                                                                                                                                                                                                                                                                                                                                                                                                                                        |
| GO:0051181 | cofactor transport             | 7   | 4.62921  | top    | 0.0029  | afc | 9606. ENSP00000225665,9606. ENSP00000229729,9606. ENSP00000257264,9606. ENSP00000262613,9606. ENSP00000362108,9606. ENSP00000377284,9606. ENSP00000394863                                                                                                                                                                                                                                                                                                                                                                                                                                                                                                                                                                                                                                                                                                                                                                                                                                                                                                                                                                                                                                                                                                                                                                                                                                                                                                                                                                                                                                                                                                                                                                                                                                                                                                                                                                                     | SLC25A11,SLC44A4,TCN1,SLC9A3R1,LCN2,FOLR1,PPT1                                                                                                                                                                                                                                                                                                                                                                                                                                                                                                                                                                                                                                                                                                                                                                                                                                                                                                                                                     |



|            |                                                 |     |          |        |        |                                                                                                                                                                                                                                                                                                                                                                                                                                                                                                                                                                                                                                                                                                                                                                                                                                                                                                                                                                                                                                                                                                                                                                                                                                                                                                                                                                                                                                                                                                                                                                                                                                                                                                                                                                                                                                                                                                                                                                                                                                                                                                                                                                                                                                                                                                                                                                                                  |                                                                                                                                                                                                                                                                                                                                                                                                                                                                                                                                                                                                                                                                                                                                                                                                                                                                                                                                                                        |
|------------|-------------------------------------------------|-----|----------|--------|--------|--------------------------------------------------------------------------------------------------------------------------------------------------------------------------------------------------------------------------------------------------------------------------------------------------------------------------------------------------------------------------------------------------------------------------------------------------------------------------------------------------------------------------------------------------------------------------------------------------------------------------------------------------------------------------------------------------------------------------------------------------------------------------------------------------------------------------------------------------------------------------------------------------------------------------------------------------------------------------------------------------------------------------------------------------------------------------------------------------------------------------------------------------------------------------------------------------------------------------------------------------------------------------------------------------------------------------------------------------------------------------------------------------------------------------------------------------------------------------------------------------------------------------------------------------------------------------------------------------------------------------------------------------------------------------------------------------------------------------------------------------------------------------------------------------------------------------------------------------------------------------------------------------------------------------------------------------------------------------------------------------------------------------------------------------------------------------------------------------------------------------------------------------------------------------------------------------------------------------------------------------------------------------------------------------------------------------------------------------------------------------------------------------|------------------------------------------------------------------------------------------------------------------------------------------------------------------------------------------------------------------------------------------------------------------------------------------------------------------------------------------------------------------------------------------------------------------------------------------------------------------------------------------------------------------------------------------------------------------------------------------------------------------------------------------------------------------------------------------------------------------------------------------------------------------------------------------------------------------------------------------------------------------------------------------------------------------------------------------------------------------------|
| GO:000375  | RNA splicing, via transesterification reactions | 127 | 0.971936 | bottom | 0.0042 | ks<br>9606. ENSP00000215793, 9606. ENSP00000215829, 9606. ENSP00000216727, 9606. ENSP00000217109, 9606. ENSP00000221419, 9606. ENSP00000221494, 9606. ENSP00000225792, 9606. ENSP00000227524, 9606. ENSP00000228284, 9606. ENSP00000229390, 9606. ENSP00000238112, 9606. ENSP00000243563, 9606. ENSP00000244020, 9606. ENSP00000246194, 9606. ENSP00000249299, 9606. ENSP00000254108, 9606. ENSP00000254193, 9606. ENSP00000258962, 9606. ENSP00000261167, 9606. ENSP00000261531, 9606. ENSP00000263579, 9606. ENSP00000263694, 9606. ENSP00000265866, 9606. ENSP00000265872, 9606. ENSP00000266079, 9606. ENSP00000269349, 9606. ENSP00000276079, 9606. ENSP00000283179, 9606. ENSP00000291552, 9606. ENSP00000293677, 9606. ENSP00000297071, 9606. ENSP00000300291, 9606. ENSP00000300413, 9606. ENSP00000301740, 9606. ENSP00000302160, 9606. ENSP00000304903, 9606. ENSP00000305556, 9606. ENSP00000305790, 9606. ENSP00000307863, 9606. ENSP00000310448, 9606. ENSP00000310723, 9606. ENSP00000313007, 9606. ENSP00000313199, 9606. ENSP00000316042, 9606. ENSP00000317123, 9606. ENSP00000318861, 9606. ENSP00000319169, 9606. ENSP00000324122, 9606. ENSP00000325376, 9606. ENSP00000325377, 9606. ENSP00000325905, 9606. ENSP00000326806, 9606. ENSP00000335321, 9606. ENSP00000336741, 9606. ENSP00000336752, 9606. ENSP00000339245, 9606. ENSP00000340823, 9606. ENSP00000341826, 9606. ENSP00000342374, 9606. ENSP00000343966, 9606. ENSP00000346694, 9606. ENSP00000347005, 9606. ENSP00000349168, 9606. ENSP00000349428, 9606. ENSP00000349748, 9606. ENSP00000352438, 9606. ENSP00000355050, 9606. ENSP00000356520, 9606. ENSP00000358635, 9606. ENSP00000358799, 9606. ENSP00000359645, 9606. ENSP00000359988, 9606. ENSP00000360532, 9606. ENSP00000361626, 9606. ENSP00000361927, 9606. ENSP00000225698, 9606. ENSP00000229239, 9606. ENSP00000245907, 9606. ENSP00000253354, 9606. ENSP00000254301, 9606. ENSP00000315130, 9606. ENSP00000342082, 9606. ENSP00000346251, 9606. ENSP00000351314, 9606. ENSP00000353099, 9606. ENSP00000355315, 9606. ENSP00000356399, 9606. ENSP00000357722, 9606. ENSP00000357727, 9606. ENSP00000357905, 9606. ENSP00000362108, 9606. ENSP00000379873, 9606. ENSP00000405573, 9606. ENSP00000415941, 9606. ENSP00000416561, 9606. ENSP00000428085, 9606. ENSP00000435370, 9606. ENSP00000452780, 9606. ENSP00000470972, 9606. ENSP00000483599 | SF3A1, SNRPD3, PABPN1, CSTF1, HNRNPL, SF3A2, DDX5, PRPF19, SART3, SRSF9, CPSF3, SNRPA, SRSF6, RALY, LSM8, FUS, SNRPA1, SRSF1, WBP11, SNW1, DCPS, SNRNP40, HNRNPH3, CCAR1, PRPF6, EIF4A3, NONO, HNRNPU, U2AFBP, RAVR1, TRA2A, NUDT21, SNRPD1, SRRM2, LSM3, CD2BP2, PCBP1, SF3B3, U2AF2, SART1, DDX23, PABPC1, HNRNPD, HNRNPA0, SNRNP200, SF3B2, PRMT5, PRPF31, HNRNPM1, WDR33, SRSF7, NCBP2, SF3B1, DHX15, FIP1L1, YTHDC1, GTF2F2, HNRNPA1, SNRPD2, PSPC1, HNRNPA2B1, CGI-74, HNRNPH1, PTBP1, SFPQ, PCBP2, CTNBL1, DHX9, SYNCRIP, RBM15, RBMX, SRSF11, CDC5L, YBX1, HNRNPH2, CSTF2, SF3A3, SRSF3, HNRNPR, NCBP1, LSM2, HNRNPK, SF1, POLR2B, DDX1, HNRNPUL1, SRSF2, HNRNPA3, GTF2F1, DDX39B, DDX17, SMU1, KHSRP, KDM1A, NHP2L1, ELAVL1, PRPF40A, EFTUD2, STRAP, HNRNPF, SNRPE, SNRPB, DDX46, TRA2B, U2SURP, SRSF10, ALYREF, LSM6, PLRG1, LUC7L3, HSPA8, CLNS1A, PUF60, CELF1, CHERP, HNRNPC, SRSF5, NOL3, RNPS1, PRPF8, RBM8A, DDX42, LSM4, SNRNP70, POLR2A, SRRT, CPSF1 |
| GO:0006959 | humoral immune response                         | 25  | 3.83141  | top    | 0.0042 | ks<br>9606. ENSP00000225698, 9606. ENSP00000229239, 9606. ENSP00000245907, 9606. ENSP00000253354, 9606. ENSP00000254301, 9606. ENSP00000315130, 9606. ENSP00000342082, 9606. ENSP00000346251, 9606. ENSP00000351314, 9606. ENSP00000353099, 9606. ENSP00000355315, 9606. ENSP00000356399, 9606. ENSP00000357722, 9606. ENSP00000357727, 9606. ENSP00000357905, 9606. ENSP00000362108, 9606. ENSP00000379873, 9606. ENSP00000405573, 9606. ENSP00000415941, 9606. ENSP00000416561, 9606. ENSP00000428085, 9606. ENSP00000435370, 9606. ENSP00000452780, 9606. ENSP00000470972, 9606. ENSP00000483599                                                                                                                                                                                                                                                                                                                                                                                                                                                                                                                                                                                                                                                                                                                                                                                                                                                                                                                                                                                                                                                                                                                                                                                                                                                                                                                                                                                                                                                                                                                                                                                                                                                                                                                                                                                              | C1QBP, GAPDH, C3, BPIFB1, LGALS3, CLU, SLPI, BPIFA1, PSMB10, HLA-DRB1, RPL39, CFH, S100A8, S100A9, DMBT1, LCN2, HLA-A, GPI, C4B, CFB, RPL30, FAU, B2M, RPS19, SPON2                                                                                                                                                                                                                                                                                                                                                                                                                                                                                                                                                                                                                                                                                                                                                                                                    |



|            |                                |     |          |        |        |     |                                                                                                                                                                                                                                                                                                                                                                                                                                                                                                                                                                                                                                                                                                                                                                                                                                                                                                                                                                                                                                                                                                                                                                                                                                                                                                                                                                                                                                                                                                                                                                                                                                                                                                                                                                                                                                                                                                                                                                                            |                                                                                                                                                                                                                                                                                                                                                                                                                                                                                                                                                                                                                                                                                                                                                                                                                                                                                                                                                                        |
|------------|--------------------------------|-----|----------|--------|--------|-----|--------------------------------------------------------------------------------------------------------------------------------------------------------------------------------------------------------------------------------------------------------------------------------------------------------------------------------------------------------------------------------------------------------------------------------------------------------------------------------------------------------------------------------------------------------------------------------------------------------------------------------------------------------------------------------------------------------------------------------------------------------------------------------------------------------------------------------------------------------------------------------------------------------------------------------------------------------------------------------------------------------------------------------------------------------------------------------------------------------------------------------------------------------------------------------------------------------------------------------------------------------------------------------------------------------------------------------------------------------------------------------------------------------------------------------------------------------------------------------------------------------------------------------------------------------------------------------------------------------------------------------------------------------------------------------------------------------------------------------------------------------------------------------------------------------------------------------------------------------------------------------------------------------------------------------------------------------------------------------------------|------------------------------------------------------------------------------------------------------------------------------------------------------------------------------------------------------------------------------------------------------------------------------------------------------------------------------------------------------------------------------------------------------------------------------------------------------------------------------------------------------------------------------------------------------------------------------------------------------------------------------------------------------------------------------------------------------------------------------------------------------------------------------------------------------------------------------------------------------------------------------------------------------------------------------------------------------------------------|
| GO:000398  | mRNA splicing, via spliceosome | 126 | 0.966932 | bottom | 0.0054 | ks  | <p>9606. ENSP00000215793, 9606. ENSP00000215829, 9606. ENSP00000216727, 9606. ENSP00000217109, 9606. ENSP00000221419, 9606. ENSP00000221494, 9606. ENSP00000225792, 9606. ENSP00000227524, 9606. ENSP00000228284, 9606. ENSP00000229390, 9606. ENSP00000238112, 9606. ENSP00000243563, 9606. ENSP00000244020, 9606. ENSP00000246194, 9606. ENSP00000249299, 9606. ENSP00000254108, 9606. ENSP00000254193, 9606. ENSP00000258962, 9606. ENSP00000261167, 9606. ENSP00000261531, 9606. ENSP00000263579, 9606. ENSP00000263694, 9606. ENSP00000265866, 9606. ENSP00000265872, 9606. ENSP00000266079, 9606. ENSP00000269349, 9606. ENSP00000276079, 9606. ENSP00000283179, 9606. ENSP00000291552, 9606. ENSP00000293677, 9606. ENSP00000297071, 9606. ENSP00000300291, 9606. ENSP00000300413, 9606. ENSP00000301740, 9606. ENSP00000302160, 9606. ENSP00000304903, 9606. ENSP00000305556, 9606. ENSP00000305790, 9606. ENSP00000307863, 9606. ENSP00000310448, 9606. ENSP00000310723, 9606. ENSP00000313007, 9606. ENSP00000313199, 9606. ENSP00000316042, 9606. ENSP00000317123, 9606. ENSP00000318861, 9606. ENSP00000319169, 9606. ENSP00000324122, 9606. ENSP00000325376, 9606. ENSP00000325377, 9606. ENSP00000325905, 9606. ENSP00000326806, 9606. ENSP00000335321, 9606. ENSP00000336741, 9606. ENSP00000336752, 9606. ENSP00000339245, 9606. ENSP00000340823, 9606. ENSP00000341826, 9606. ENSP00000342374, 9606. ENSP00000343966, 9606. ENSP00000346694, 9606. ENSP00000347005, 9606. ENSP00000349168, 9606. ENSP00000349428, 9606. ENSP00000349748, 9606. ENSP00000352438, 9606. ENSP00000355050, 9606. ENSP00000356520, 9606. ENSP00000358635, 9606. ENSP00000358799, 9606. ENSP00000359645, 9606. ENSP00000359988, 9606. ENSP00000360532, 9606. ENSP00000361626, 9606. ENSP00000361927, 9606. ENSP00000342082, 9606. ENSP00000346251, 9606. ENSP00000355315, 9606. ENSP00000357905, 9606. ENSP00000379873, 9606. ENSP00000435370, 9606. ENSP00000452780, 9606. ENSP00000483599</p> | <p>SF3A1, SNRPD3, PABPN1, CSTF1, HNRNPL, SF3A2, DDX5, PRPF19, SART3, SRSF9, CPSF3, SNRPA, SRSF6, RALY, LSM8, FUS, SNRPA1, SRSF1, WBP11, SNW1, DCPS, SNRNP40, HNRNPH3, CCAR1, PRPF6, EIF4A3, NONO, HNRNPU, U2AFB1, RAVER1, TRA2A, NUDT21, SNRPD1, SRRM2, LSM3, CD2BP2, PCBP1, SF3B3, U2AF2, SART1, DDX23, PABPC1, HNRNPD, HNRNPA0, SNRNP200, SF3B2, PRMT5, PRPF31, HNRNPM1, WDR33, SRSF7, NCBP2, SF3B1, DHX15, FIP1L1, YTHDC1, GTF2F2, HNRNPA1, SNRPD2, PSPC1, HNRNPA2B1, CGI-74, HNRNPH1, PTBP1, SFPQ, PCBP2, CTNBL1, DHX9, SYNCRIP, RBM15, RBMX, SRSF11, CDC5L, YBX1, HNRNPH2, CSTF2, SF3A3, SRSF3, HNRNPR, NCBP1, LSM2, HNRNPK, SF1, POLR2B, DDX1, HNRNPU1, SRSF2, HNRNPA3, GTF2F1, DDX39B, DDX17, SMU1, KDM1A, NHP2L1, ELAVL1, PRPF40A, EFTUD2, STRAP, HNRNPF, SNRPE, SNRPB, DDX46, TRA2B, U2SURP, SRSF10, ALYREF, LSM6, PLRG1, LUC7L3, HSPA8, CLNS1A, PUF60, CELF1, CHERP, HNRNPC, SRSF5, NOL3, RNP51, PRPF8, RBM8A, DDX42, LSM4, SNRNP70, POLR2A, SRR1, CPSF1</p> |
| GO:0019731 | antibacterial humoral response | 8   | 3.96728  | top    | 0.0079 | afc | <p>SLPI, BPIFA1, RPL39, DMBT1, HLA-A, FAU, B2M, SPON2</p>                                                                                                                                                                                                                                                                                                                                                                                                                                                                                                                                                                                                                                                                                                                                                                                                                                                                                                                                                                                                                                                                                                                                                                                                                                                                                                                                                                                                                                                                                                                                                                                                                                                                                                                                                                                                                                                                                                                                  |                                                                                                                                                                                                                                                                                                                                                                                                                                                                                                                                                                                                                                                                                                                                                                                                                                                                                                                                                                        |

T = 72 h, IFN $\lambda$ 3: CoV-2 / mock

| #Term ID   | Term Description                           | Genes Mapped | Enrichment Score | Direction | False Discovery Rate | Method | Matching Proteins in Your Input (IDs)                                                                                                                                                        | Matching Proteins in Your Input (Labels)  |
|------------|--------------------------------------------|--------------|------------------|-----------|----------------------|--------|----------------------------------------------------------------------------------------------------------------------------------------------------------------------------------------------|-------------------------------------------|
| GO:0016266 | O-glycan processing                        | 6            | 6.63864          | top       | 0.00016              | afc    | 9606.ENSP00000287590,9606.ENSP00000360776,9606.ENSP00000381008,9606.ENSP00000417498,9606.ENSP00000436812,9606.ENSP00000484824                                                                | B3GNT7,B4GALT5,MUC16,MUC4,MUC5B,MUC1      |
| GO:0006493 | protein O-linked glycosylation             | 7            | 5.44046          | top       | 0.00082              | afc    | 9606.ENSP00000287590,9606.ENSP00000360776,9606.ENSP00000381008,9606.ENSP00000417498,9606.ENSP00000425809,9606.ENSP00000436812,9606.ENSP00000484824                                           | B3GNT7,B4GALT5,MUC16,MUC4,PGM3,MUC5B,MUC1 |
| GO:0030449 | regulation of complement activation        | 7            | 5.34925          | top       | 0.00082              | afc    | 9606.ENSP00000225698,9606.ENSP00000245907,9606.ENSP00000315130,9606.ENSP00000356399,9606.ENSP00000379191,9606.ENSP00000416561,9606.ENSP00000479488                                           | C1QBP,C3,CLU,CFH,CD59,CFB,PHB             |
| GO:2000257 | regulation of protein activation cascade   | 7            | 5.34925          | top       | 0.00082              | afc    | 9606.ENSP00000225698,9606.ENSP00000245907,9606.ENSP00000315130,9606.ENSP00000356399,9606.ENSP00000379191,9606.ENSP00000416561,9606.ENSP00000479488                                           | C1QBP,C3,CLU,CFH,CD59,CFB,PHB             |
| GO:0006957 | complement activation, alternative pathway | 3            | 8.57137          | top       | 0.0013               | afc    | 9606.ENSP00000245907,9606.ENSP00000356399,9606.ENSP00000416561                                                                                                                               | C3,CFH,CFB                                |
| GO:0002673 | regulation of acute inflammatory response  | 9            | 4.48606          | top       | 0.0025               | afc    | 9606.ENSP00000225698,9606.ENSP00000245907,9606.ENSP00000315130,9606.ENSP00000356399,9606.ENSP00000379191,9606.ENSP00000381607,9606.ENSP00000416561,9606.ENSP00000418770,9606.ENSP00000479488 | C1QBP,C3,CLU,CFH,CD59,GSTP1,CFB,PARK7,PHB |
| GO:0006956 | complement activation                      | 5            | 6.08964          | top       | 0.0025               | afc    | 9606.ENSP00000225698,9606.ENSP00000245907,9606.ENSP00000315130,9606.ENSP00000356399,9606.ENSP00000416561                                                                                     | C1QBP,C3,CLU,CFH,CFB                      |
| GO:0002920 | regulation of humoral immune response      | 8            | 4.56308          | top       | 0.0039               | afc    | 9606.ENSP00000225698,9606.ENSP00000245907,9606.ENSP00000315130,9606.ENSP00000356399,9606.ENSP00000379191,9606.ENSP00000391592,9606.ENSP00000416561,9606.ENSP00000479488                      | C1QBP,C3,CLU,CFH,CD59,PTPN6,CFB,PHB       |
| GO:0072376 | protein activation cascade                 | 6            | 5.18805          | top       | 0.0066               | afc    | 9606.ENSP00000225698,9606.ENSP00000245907,9606.ENSP00000315130,9606.ENSP00000356399,9606.ENSP00000377055,9606.ENSP00000416561                                                                | C1QBP,C3,CLU,CFH,PRCP,CFB                 |

**Supplementary Table 4: Primer sequences for Taqman PCR**

| <b>Primer</b>                           | <b>Sequence (5'-3')</b>             |
|-----------------------------------------|-------------------------------------|
| <i>GAPDH</i> fwd                        | ccatctccaggagcgaga                  |
| <i>GAPDH</i> rev                        | caggaggcattgctgatgac                |
| <i>GAPDH</i> probe                      | YAK-agtggggcgatgctggcgctgag-BBQ     |
| $\beta$ - <i>Actin</i> fwd              | cacccgccgagctcacat                  |
| $\beta$ - <i>Actin</i> rev              | caccatcacgccctggtgcct               |
| $\beta$ - <i>Actin</i> probe            | Cy5-gatatgccgctcgtcgtcgacaacggc-BBQ |
| <i>M-gene</i> fwd                       | tgtgacatcaaggacctgcc                |
| <i>M-gene</i> rev                       | ctgagtcacctgctacacgc                |
| <i>M-gene</i> probe<br>(PMID 32575728)  | FAM-tgttgctacatcacgaacgc-BHQ1       |
| <i>N-gene</i> fwd<br>(pWhSF-N-F9)       | acattggcaccgcaatc                   |
| <i>N-gene</i> rev<br>(pWhSF-N-R10)      | cgagaagaggcttgactgcc                |
| <i>N-gene</i> probe<br>(pWhSF-N-P11lna) | FAM-cct+caaggaa+caa+catt-BHQ1       |

(+ = LNA (locked nucleic acid) modified)

**Supplementary Table 5: Primer sequences for Sybr Green PCR**

| <b>Gene</b>     | <b>Forward Primer Sequence (5'-3')</b> | <b>Reverse Primer Sequence (5'-3')</b> |
|-----------------|----------------------------------------|----------------------------------------|
| <i>GAPDH</i>    | caaggtcatccatgacaacttg                 | gtccaccaccctgttgctgtag                 |
| <i>APOBEC3G</i> | ggttacctgcttcacctcct                   | atcatagatcgggcagtgga                   |
| <i>IDO1</i>     | caaaggtcatggagatgtcc                   | ccaccaatagagagaccagg                   |
| <i>IFITM3</i>   | ggtcttcgctggacacat                     | tgtccctagacttcacggagta                 |
| <i>ISG15</i>    | gagaggcagcgaactcatct                   | agggacacctggaattcggt                   |
| <i>Tetherin</i> | aagggtcttcaggatgtgga                   | ttgtccttgggccttctct                    |
